# Supplementary material for: Transcriptomic Profiling of Gametogenesis in Triploid Pacific Oysters Crassostrea gigas: Towards an Understanding of Partial Sterility Associated with Triploidy
Source: PLoS One. 2014 Nov 6;9(11):e112094. doi: 10.1371/journal.pone.0112094 (PMC4222980; doi:10.1371/journal.pone.0112094)
Supplement: File S5 — List of different genes between 2n, 3nα and 3nβ gonads. This file provides the list of genes that contributes towards the differences between 2n, 3nα and 3nβ gonads (Two-way ANOVA on all 2n and 3n StIII, and on male and female individuals (p<0.01, Bonferroni adjusted)). spot: Identity of the spot on the microarray; ID: Genbank accession number; Description: description as uploaded from Sigenae (http://www.sigenae.org); gameto: stage of gametogenesis; tissus: tissu specific of the gene; 2N Mean: mean of log normalized expression values of diploids; 2n StDev: standard deviation of log normalized expression values of diploids; 3Na Mean: mean of log normalized expression values of alpha triploids; 3Na StDev: Standard deviation of log normalized expression values of alpha triploids; 3Nb Mean: mean of log normalized expression values of beta triploids; 3Nb StDev: Standard deviation of log normalized expression values of beta triploids; F ratio; SS (groups): Sum of square between groups; SS (error): Sum of squares of error; df (groups): degrees of freedom for groups; df (error): degrees of freedom for error; raw p value; Adj p value: Adjusted p value. (XLS) [file pone.0112094.s005.xls]

## Sheet: anova St3 all
spot	ID	Description	gameto	tissus	2N F mean	2N F Stdev	2N M mean	2N M Stdev	3Na F mean	3Na F Stdev	3Nb F mean	3Nb F Stdev	3Na M mean	3Na M Stdev	3Nb M mean	3Nb M Stdev	F ratio	SS(Groups)	SS(Error)	df(Groups)	df(Error)	Raw p value	Adj p value
19713	AM854655	0	1	0	0.862346	0.0911606	1.23291	0.02704	0.941784	0.0768394	1.09704	0.0444618	1.15778	0.130225	1.237	0.0385648	18.1823	0.476731	0.0891463	5	17	2.74363e-06	0.00211259
26178	CU987921	0	1	0	0.0409454	0.035528	0.186448	0.0340026	0.033698	0.0947845	0.262208	0.0711213	0.0512908	0.0574874	-0.120993	0.025617	20.9189	0.356608	0.0579605	5	17	1.02223e-06	0.000928185
26921	CU988469	hypothetical protein BRAFLDRAFT_109857 [Branchiostoma floridae]	1	0	1.06498	0.104526	1.28626	0.0939146	1.46023	0.0453707	1.72244	0.0502036	1.5657	0.136476	1.15647	0.0787994	32.3707	1.22678	0.128853	5	17	4.11354e-08	5.67668e-05
22876	CU988867	0	1	0	0.82746	0.132024	0.968774	0.132339	1.2167	0.0332752	1.44166	0.0919704	1.26663	0.150756	0.75362	0.130363	21.1605	1.43125	0.229968	5	17	9.41822e-07	0.000872127
28691	CU989260	0	1	0	-0.0241809	0.144759	0.210057	0.101433	0.235465	0.0651012	0.491881	0.0850005	0.363865	0.0798905	-0.240755	0.101617	27.216	1.37572	0.171865	5	17	1.5079e-07	0.000182154
37182	CU989322	0	1	0	-0.327945	0.101418	-0.16707	0.199675	0.16198	0.0644688	0.457228	0.193587	0.123471	0.152462	-0.213663	0.105132	16.3899	1.71136	0.355012	5	17	5.60586e-06	0.00366063
29110	CU989352	0	1	0	0.240019	0.0895372	0.421523	0.118664	0.70841	0.0943372	0.735654	0.125068	0.529116	0.0482187	-0.0607216	0.201677	23.2175	1.82045	0.266589	5	17	4.8321e-07	0.00049674
18300	CU989944	0	1	visceral ganglion	0.0704124	0.10111	0.291517	0.137052	0.578121	0.0982251	0.616367	0.00653887	0.478742	0.0491266	0.12777	0.110842	22.9486	1.06493	0.157777	5	17	5.25716e-07	0.000535705
15654	CU990442	(sp:P04630) Calmodulin-like protein OS=Caenorhabditis elegans GN=cal-1 PE=2 SV=1	1	0	-0.467608	0.108179	-0.130169	0.0569218	0.229695	0.0737551	0.428468	0.15394	0.151491	0.0981751	-0.376468	0.165106	36.3619	2.49503	0.233297	5	17	1.69738e-08	2.56645e-05
308	CU990495	0	1	0	-0.0634484	0.0799824	0.122461	0.0638341	0.330353	0.0933715	0.457978	0.146229	0.247954	0.125671	0.0676449	0.0838958	13.8624	0.711145	0.174421	5	17	1.72e-05	0.0088408
13317	AM855077	0	1	0	1.34215	0.144591	1.63065	0.0420674	1.80692	0.084583	2.00383	0.10146	1.83839	0.0752142	1.48773	0.090217	25.5542	1.17328	0.156105	5	17	2.40017e-07	0.00027122
22989	CU991221	0	1	0	1.45319	0.0712786	1.53502	0.0657372	1.61201	0.118668	1.73843	0.0425179	1.70502	0.10877	1.26918	0.0937386	15.7408	0.582862	0.125898	5	17	7.37463e-06	0.00454277
35155	CU992116	0	1	0	0.300651	0.0866144	0.345809	0.184348	0.633685	0.0603479	0.773536	0.101563	0.567766	0.0316114	0.18797	0.0628702	18.8336	0.998103	0.180186	5	17	2.1463e-06	0.00173207
41231	CU992275	0	1	0	0.114183	0.169132	0.330905	0.121267	0.807914	0.105983	1.04125	0.057953	0.825841	0.2427	0.27917	0.0877268	29.2248	2.70416	0.314601	5	17	8.87528e-08	0.000113249
18665	AM855242	0	1	0	0.708558	0.109645	1.20803	0.0552739	1.18169	0.0214928	1.32023	0.113404	1.19529	0.114305	0.90329	0.0856463	26.8861	1.05438	0.133336	5	17	1.65035e-07	0.000197217
33008	CU992875	(sp:Q92743) Serine protease HTRA1 OS=Homo sapiens GN=HTRA1 PE=1 SV=1	1	0	0.333512	0.0482914	0.400529	0.0625273	0.849522	0.0801923	1.07298	0.12148	0.751442	0.097958	0.306487	0.132735	43.9804	1.99642	0.154337	5	17	3.90186e-09	6.64487e-06
31424	CU993043	(sp:P64922) Uncharacterized protein Mb2028c OS=Mycobacterium bovis GN=Mb2028c PE=4 SV=1	1	0	0.89844	0.0921662	0.915135	0.097515	1.09673	0.0389548	1.33181	0.114864	1.08841	0.0813514	0.815493	0.108041	16.1832	0.696827	0.146399	5	17	6.11159e-06	0.00392975
10580	AM855355	beta-lactamase [Streptosporangium roseum DSM 43021]	1	0	0.830721	0.128336	1.14508	0.107063	1.2125	0.0555915	1.34712	0.0948758	1.24394	0.057275	0.884933	0.121611	16.6953	0.839679	0.171001	5	17	4.94214e-06	0.00332112
39698	CU993463	0	1	0	0.970172	0.117076	1.00914	0.0598224	1.08578	0.0957426	1.32163	0.0377488	1.08228	0.118201	0.649379	0.0871327	24.105	0.952508	0.134351	5	17	3.67923e-07	0.000395149
31602	CU993580	(sp:P34641) Protein ced-11 OS=Caenorhabditis elegans GN=ced-11 PE=2 SV=1	1	0	0.470638	0.0513636	0.750649	0.0433542	0.302192	0.0984634	0.434655	0.0662863	0.440889	0.0978986	0.521175	0.0466511	18.2549	0.437675	0.0815174	5	17	2.66861e-06	0.00207618
37215	CU993930	hypothetical protein SS1G_08041 [Sclerotinia sclerotiorum 1980]	1	0	0.621731	0.132885	0.943007	0.0246338	1.32803	0.0792517	1.41065	0.153762	1.13901	0.0583894	0.75558	0.136941	32.2357	1.96868	0.207643	5	17	4.24566e-08	5.83778e-05
42263	AM855454	(sp:P25931) Neuropeptide Y receptor OS=Drosophila melanogaster GN=NepYr PE=2 SV=2	1	hemocyte	-0.259516	0.139371	-0.181927	0.0588659	0.130611	0.137504	0.161067	0.069186	0.0177084	0.0846746	-0.337041	0.121501	14.9647	0.873137	0.198378	5	17	1.03589e-05	0.00598742
43135	AM855494	0	1	visceral ganglion	-0.277422	0.061997	0.0206354	0.131951	-0.403221	0.104863	-0.198253	0.0760485	-0.313791	0.0307542	-0.578943	0.126544	16.7308	0.807189	0.164035	5	17	4.87073e-06	0.00328775
42134	CU994467	0	1	0	0.616284	0.110103	0.877155	0.0367237	1.01996	0.0342839	1.15929	0.0624835	0.998137	0.0369361	0.880919	0.0694398	31.2548	0.669652	0.0728471	5	17	5.36123e-08	7.22694e-05
34110	AM855614	0	1	0	0.488755	0.0436849	0.498315	0.0460192	0.703847	0.011596	0.718425	0.111628	0.60402	0.0831985	0.42242	0.0482732	14.2971	0.297292	0.0706992	5	17	1.40319e-05	0.0075632
27743	CU995932	0	1	0	0.625541	0.0367308	0.671153	0.0831875	0.773795	0.0782645	0.886141	0.0202673	0.859036	0.0460175	0.479496	0.0325489	29.7895	0.454112	0.0518297	5	17	7.69088e-08	9.92892e-05
21361	CU996040	0	1	0	0.786693	0.123056	0.61077	0.122556	0.797569	0.107116	0.926605	0.105196	0.637442	0.027885	0.316279	0.0286223	18.8293	0.89783	0.162121	5	17	2.14978e-06	0.00173272
18109	CU996182	0	1	0	-0.183566	0.261615	0.650987	0.110758	0.451371	0.157449	0.649208	0.061541	0.501075	0.0513394	0.836018	0.102301	23.3558	2.50408	0.364529	5	17	4.62836e-07	0.000479961
40341	CU996531	(sp:A3LYI0) Stress response protein NST1 OS=Pichia stipitis GN=NST1 PE=3 SV=2	1	visceral ganglion	0.231117	0.142245	0.531025	0.0651941	0.886762	0.132398	0.869135	0.0963751	0.703767	0.0561739	0.35586	0.128079	23.5581	1.45109	0.209428	5	17	4.34766e-07	0.0004552
17530	CU997352	0	1	0	-0.154705	0.112605	0.159289	0.151824	0.0640395	0.130524	0.260602	0.0882241	0.0274066	0.0375472	-0.293611	0.0827448	13.768	0.830173	0.205011	5	17	1.79889e-05	0.00917431
10901	CU997504	(sp:Q99NA2) Protein atonal homolog 8 OS=Mus musculus GN=Atoh8 PE=2 SV=1	1	0	0.631356	0.107296	0.50636	0.188336	0.624096	0.0356592	0.759753	0.0664412	0.465017	0.0629433	0.0920753	0.16698	14.5036	1.06463	0.249577	5	17	1.27602e-05	0.0070819
28377	CU997579	0	1	0	0.738128	0.0333327	1.00965	0.0367983	0.833468	0.0647547	0.857142	0.0540901	0.920425	0.0452859	0.98532	0.0722541	14.4181	0.205738	0.0485158	5	17	1.32701e-05	0.00729858
37774	CU997749	(sp:O15943) Neural-cadherin OS=Drosophila melanogaster GN=CadN PE=1 SV=2	1	0	0.671524	0.175874	0.866476	0.106779	1.1592	0.102796	1.33255	0.0502872	1.08091	0.0871716	0.745536	0.0874297	21.7318	1.30658	0.204418	5	17	7.78338e-07	0.000751875
26504	CU998071	0	1	0	0.571282	0.0956263	0.669917	0.0480262	1.00999	0.0642042	1.22116	0.116538	0.932778	0.0482913	0.502978	0.188261	26.8074	1.56471	0.198453	5	17	1.68651e-07	0.000200695
16766	AM856001	0	1	0	-0.192407	0.180673	0.0112601	0.173195	0.407759	0.140765	0.673024	0.138456	0.366563	0.0607255	-0.0912796	0.18872	18.218	2.24559	0.419092	5	17	2.70649e-06	0.00209482
18636	CU998619	(sp:Q2PFW9) RNA-binding protein Nova-1 OS=Macaca fascicularis GN=NOVA1 PE=2 SV=1	1	0	1.01906	0.0373401	1.08191	0.0594102	0.879827	0.031356	1.09311	0.0511164	0.866075	0.0784039	0.65147	0.0509679	41.9022	0.562566	0.0456473	5	17	5.68585e-09	9.37027e-06
35060	CU998647	hypothetical protein [Monosiga brevicollis MX1]	1	0	0.230605	0.162201	0.307798	0.0868395	0.454774	0.0538125	0.629367	0.0698771	0.427104	0.0259368	0.0133481	0.104989	18.9786	0.889207	0.159301	5	17	2.03408e-06	0.00165574
38706	CU998753	0	1	0	0.615424	0.101874	0.837604	0.139226	0.982157	0.0686726	1.164	0.167499	0.828326	0.0210603	0.579896	0.100394	15.1236	0.972923	0.218726	5	17	9.65194e-06	0.00566569
40863	AM856030	0	1	0	0.240059	0.149388	0.490069	0.0812231	0.581958	0.0657422	0.749124	0.050318	0.471154	0.051523	0.181212	0.158821	16.2621	0.900558	0.188285	5	17	5.91291e-06	0.00384339
13473	CU999072	0	1	0	0.191994	0.0754864	0.212632	0.0387967	0.143405	0.045644	0.302178	0.0491609	0.0305563	0.145652	-0.1259	0.00888362	19.8288	0.453591	0.0777764	5	17	1.49439e-06	0.00129563
2687	CU999082	0	1	0	0.685689	0.148136	0.993378	0.0504918	1.07361	0.0654436	1.27948	0.107609	1.32922	0.0846339	1.25522	0.116647	21.5439	1.11657	0.176214	5	17	8.28326e-07	0.000790223
36035	CU999155	(sp:P50131) Prostaglandin E2 receptor EP3 subtype OS=Sus scrofa GN=PTGER3 PE=2 SV=1	1	0	0.357983	0.153502	0.567019	0.0876659	0.70049	0.133723	0.865605	0.113473	0.642522	0.0827252	0.236428	0.112517	15.093	1.05511	0.237685	5	17	9.78384e-06	0.00572355
43288	AM856062	0	1	0	1.21243	0.0458004	1.34041	0.0631661	1.41257	0.0514715	1.61647	0.0898982	1.40672	0.0564785	1.099	0.0777552	28.8845	0.63693	0.0749731	5	17	9.68685e-08	0.000122054
31038	CU999587	0	1	0	0.633195	0.0711226	0.91889	0.0484807	0.557187	0.0854579	0.803211	0.0924715	0.584841	0.0993652	0.520063	0.0889738	14.6021	0.486528	0.113284	5	17	1.21988e-05	0.00681911
29551	CU999623	0	1	0	0.967929	0.107704	1.14864	0.123141	0.854091	0.103807	1.08977	0.0450468	0.862785	0.0244976	0.421489	0.121611	27.6678	1.3368	0.164275	5	17	1.33454e-07	0.000163615
5669	CU999643	0	1	0	1.61048	0.0645974	1.60613	0.0670549	1.61336	0.0247314	1.76884	0.0610616	1.58584	0.0649137	1.42042	0.0201181	17.1062	0.24487	0.0486699	5	17	4.18312e-06	0.00293237
42994	CU999851	0	1	0	0.310209	0.0884649	0.687304	0.0656861	0.549589	0.0872814	0.809746	0.0695284	0.559119	0.0244513	0.477369	0.0140186	26.5859	0.590865	0.0755641	5	17	1.79318e-07	0.000211954
36432	CX069299	"(sp:O78310) Superoxide dismutase [Cu-Zn], chloroplastic OS=Arabidopsis thaliana GN=SODCP PE=1 SV=2"	1	0	0.61736	0.140083	0.56662	0.0629013	0.802737	0.0645511	0.935755	0.0313991	0.810996	0.0796469	0.499704	0.0689807	16.8387	0.560432	0.11316	5	17	4.661e-06	0.0032021
34587	CX739578	calponin/transgelin [Schistosoma mansoni]	1	0	1.20825	0.0561864	1.27095	0.0652363	1.48537	0.0927229	1.59334	0.0553325	1.52319	0.0616994	1.18979	0.121224	18.6321	0.596858	0.108915	5	17	2.31398e-06	0.0018373
10648	DV736431	0	1	0	1.84615	0.0704687	2.01521	0.0713169	2.08696	0.056604	2.30238	0.0540298	2.18248	0.0923467	1.82637	0.0802715	27.2374	0.680229	0.0849119	5	17	1.49914e-07	0.000181246
24606	AM856178	(sp:Q05974) Ras-related protein Rab-1A OS=Lymnaea stagnalis GN=RAB1A PE=2 SV=1	1	0	-0.195778	0.123649	-0.0479349	0.05219	-0.0379079	0.0502067	0.157988	0.0690928	-0.014578	0.0609548	-0.226344	0.0495925	14.354	0.383046	0.0907312	5	17	1.36679e-05	0.00743536
20916	DV736776	0	1	0	0.838984	0.104745	0.749035	0.136323	0.859005	0.0368738	0.984865	0.074107	0.753259	0.0405989	0.37434	0.117237	19.0614	0.861972	0.153751	5	17	1.97296e-06	0.00161783
6715	EE677626	0	1	0	-0.0242209	0.080267	-0.067729	0.130044	0.673439	0.101699	0.803891	0.148379	0.505181	0.180129	-0.000937061	0.0638575	42.0689	3.02236	0.244266	5	17	5.51331e-09	9.12453e-06
38560	EE677631	0	1	0	0.217188	0.180556	0.543289	0.127955	0.741221	0.123071	0.866008	0.0837428	0.626054	0.128849	0.206953	0.122489	17.1075	1.46728	0.291612	5	17	4.18092e-06	0.002935
42744	EE677808	(sp:Q9VJS8) Zinc finger protein Elbow OS=Drosophila melanogaster GN=elB PE=1 SV=3	1	0	0.60472	0.0415556	0.655851	0.0981843	0.882219	0.117647	0.964084	0.0480687	0.762053	0.0630239	0.570236	0.0633955	16.5762	0.499997	0.102556	5	17	5.18987e-06	0.00345646
20072	EE677826	transmembrane domains-containing protein [Ixodes scapularis]	1	0	0.0848608	0.121484	0.428328	0.111338	0.509492	0.0886966	0.667161	0.0881057	0.497422	0.0215177	0.210216	0.0728255	21.2154	0.905958	0.145189	5	17	9.24529e-07	0.000860737
22612	AM856299	0	1	0	-0.109827	0.0609782	0.232016	0.0421161	0.0264602	0.0880403	0.238241	0.0725608	0.0456866	0.0520041	-0.0697804	0.125786	13.5893	0.43326	0.1084	5	17	1.95946e-05	0.00977773
15986	ES789553	0	1	0	-0.329138	0.0471644	-0.21626	0.121692	-0.0474412	0.0354231	0.081091	0.081726	-0.0733594	0.0402211	-0.440386	0.0894967	24.692	0.741969	0.102167	5	17	3.0867e-07	0.000337685
18916	ES789629	0	1	0	-0.0305478	0.0592108	0.179429	0.0552016	0.190871	0.0722344	0.359316	0.0809894	0.357343	0.117851	0.167772	0.0162671	16.0486	0.394427	0.0835622	5	17	6.46839e-06	0.0041333
28695	ES789714	0	1	mantle	0.0825438	0.227189	0.125651	0.250133	0.918787	0.146735	1.09152	0.232064	0.899902	0.148511	0.237821	0.110108	21.3045	4.06778	0.649179	5	17	8.97264e-07	0.000841634
9678	ES789928	"(sp:P13543) Myosin regulatory light chain, striated adductor muscle OS=Aequipecten irradians PE=1 SV=3"	1	0	0.362324	0.0169367	0.301059	0.0871436	0.625014	0.116145	0.820421	0.116951	0.657557	0.110366	0.268875	0.120775	19.534	0.995456	0.173265	5	17	1.66092e-06	0.00141012
8315	EW778597	(sp:P17140) Collagen alpha-2(IV) chain OS=Caenorhabditis elegans GN=let-2 PE=1 SV=2	1	0	0.187183	0.0796119	0.29399	0.0890527	0.0657323	0.0384131	0.160308	0.134155	0.0771189	0.0101213	-0.246061	0.133582	14.8891	0.678599	0.154962	5	17	1.07156e-05	0.00612932
2319	AM856415	0	1	0	0.12962	0.101241	0.131087	0.126105	0.453263	0.145073	0.521555	0.0441718	0.277872	0.0779045	-0.0287769	0.141984	13.7134	0.887607	0.220066	5	17	1.84628e-05	0.00936066
14930	EW779136	0	1	0	1.0448	0.0626955	1.00112	0.0858247	1.12836	0.056493	1.2912	0.10779	1.1359	0.0529037	0.758142	0.126439	16.211	0.628787	0.131878	5	17	6.04081e-06	0.00389028
35693	AM856426	(sp:Q5SPF7) Protein unc-93 homolog A OS=Danio rerio GN=unc93a PE=3 SV=1	1	0	-0.53353	0.0788292	-0.395853	0.086877	-0.331754	0.0950235	-0.0939921	0.0808209	-0.313456	0.05436	-0.587736	0.0936222	17.4752	0.617671	0.120175	5	17	3.61134e-06	0.00263989
11412	EW779441	0	1	0	-0.0726343	0.0716008	0.0379166	0.0640268	0.131759	0.0406334	0.335787	0.142173	0.25444	0.156469	-0.168651	0.103432	13.8722	0.711278	0.17433	5	17	1.712e-05	0.00883393
37485	EW779476	0	1	0	-0.0111622	0.0557978	0.0753083	0.0206692	-0.153269	0.135359	-0.00598187	0.0522856	-0.138148	0.0371708	-0.329397	0.0728517	15.2412	0.414536	0.0924745	5	17	9.16353e-06	0.0054523
31861	AM856448	0	1	0	0.820956	0.0759791	0.797384	0.103395	0.923073	0.0810999	1.27114	0.107128	0.948667	0.146789	0.651242	0.093621	17.1995	0.874843	0.172939	5	17	4.0296e-06	0.00286907
32790	FP000452	(sp:A2ASS6) Titin OS=Mus musculus GN=Ttn PE=1 SV=1	1	adductor muscle	0.873744	0.0806328	1.11826	0.109311	0.781834	0.107328	0.947761	0.116202	0.769833	0.0645953	0.446072	0.083828	21.371	1.00472	0.159845	5	17	8.77484e-07	0.000829222
33498	FP000846	0	1	0	0.667154	0.0541248	0.812372	0.0633383	0.848438	0.018788	1.02912	0.0443463	0.805016	0.0384725	0.473842	0.0348059	68.9513	0.69716	0.0343771	5	17	1.10614e-10	2.24436e-07
35404	FP001479	0	1	0	-0.423935	0.164963	0.324837	0.0582833	-0.351512	0.0371311	-0.277185	0.0540736	-0.0590446	0.126447	0.25453	0.106718	40.3069	2.02579	0.170881	5	17	7.68106e-09	1.2428e-05
6064	FP001902	0	1	0	0.148955	0.086414	0.371817	0.0463827	0.196	0.0222938	0.387829	0.0490074	0.184102	0.0559997	0.197867	0.0538412	13.7073	0.211742	0.052521	5	17	1.8517e-05	0.00936959
19970	FP001918	(sp:O73925) Potassium voltage-gated channel subfamily KQT member 1 OS=Squalus acanthias GN=KCNQ1 PE=2 SV=1	1	0	0.496381	0.0687509	0.6159	0.0293634	0.68846	0.0741903	0.784973	0.0462245	0.594154	0.0735231	0.273961	0.0764755	31.1218	0.622859	0.0680461	5	17	5.53617e-08	7.41847e-05
21799	FP001999	(sp:Q95ZJ1) Polypeptide N-acetylgalactosaminyltransferase 5 OS=Caenorhabditis elegans GN=gly-5 PE=1 SV=2	1	0	1.16567	0.0759513	1.42803	0.103253	1.21426	0.112917	1.40009	0.0703472	0.986581	0.0347891	0.752205	0.145669	25.9262	1.28461	0.168466	5	17	2.15817e-07	0.000248405
10475	FP002214	(sp:Q99836) Myeloid differentiation primary response protein MyD88 OS=Homo sapiens GN=MYD88 PE=1 SV=1	1	0	0.344845	0.126775	0.779783	0.0741645	0.624945	0.0814073	0.892148	0.0867993	0.560785	0.0394431	0.23594	0.0849577	32.2659	1.25235	0.131965	5	17	4.21571e-08	5.80082e-05
21712	FP002416	0	1	0	1.06638	0.0567152	1.20083	0.0383241	1.28926	0.0256813	1.39246	0.0307051	1.38733	0.0565174	1.22605	0.0344431	34.2495	0.290219	0.0288105	5	17	2.68075e-08	3.88709e-05
22459	FP002469	0	1	0	0.0897012	0.126201	0.395211	0.146807	0.735927	0.118794	0.900712	0.0916728	0.719101	0.0378355	0.335854	0.170389	22.97	1.82371	0.269945	5	17	5.2219e-07	0.000533678
13157	FP002471	(sp:Q8WZ42) Titin OS=Homo sapiens GN=TTN PE=1 SV=2	1	0	1.18825	0.0759935	1.42663	0.188668	1.09938	0.154574	1.37801	0.117596	1.13028	0.0797181	0.781483	0.0717723	13.6578	1.06628	0.265441	5	17	1.89607e-05	0.00953725
26994	FP002983	0	1	0	1.12527	0.143402	1.30271	0.0884738	1.52209	0.0903293	1.59827	0.0867978	1.44967	0.121269	1.04965	0.105761	16.7622	0.962462	0.195223	5	17	4.80863e-06	0.00326987
23032	FP003429	0	1	0	1.44638	0.116928	1.64126	0.0752102	1.55132	0.0613126	1.81349	0.046167	1.57251	0.0570312	1.24526	0.027995	29.2109	0.726101	0.0845145	5	17	8.90694e-08	0.000113563
12430	FP003517	(sp:O93297) Cytochrome P450 2K4 OS=Oncorhynchus mykiss GN=cyp2k4 PE=2 SV=1	1	0	0.084338	0.0922419	0.347399	0.15723	0.453274	0.0643819	0.754619	0.0194799	0.490922	0.108089	0.264236	0.102612	20.6564	1.02199	0.168217	5	17	1.11837e-06	0.00100541
13104	FP003926	hypothetical protein BRAFLDRAFT_82426 [Branchiostoma floridae]	1	0	1.79169	0.0699821	2.00955	0.0781239	2.27807	0.020517	2.41679	0.0608484	2.3309	0.086994	1.90774	0.0567836	60.3086	1.24488	0.070182	5	17	3.23246e-10	6.3033e-07
34639	FP004026	0	1	0	1.77364	0.045549	1.89821	0.0570672	2.15178	0.0495361	2.30428	0.0198999	2.1344	0.0994577	1.80457	0.0742866	51.1034	0.915093	0.0608828	5	17	1.20248e-09	2.1849e-06
41424	FP004061	0	1	0	1.30521	0.148448	1.59324	0.0452787	1.90771	0.110277	2.23468	0.129543	1.99564	0.125074	1.55208	0.0900396	35.8845	2.26597	0.214697	5	17	1.87806e-08	2.80206e-05
8695	FP004076	0	1	adductor muscle	1.03492	0.0344223	1.13167	0.116888	1.13829	0.0460039	1.29515	0.073419	1.06989	0.100576	0.747166	0.0736372	21.6168	0.658431	0.103561	5	17	8.08503e-07	0.000776163
16754	AM856782	(sp:P29172) Microtubule-associated protein tau OS=Bos taurus GN=MAPT PE=1 SV=3	1	0	0.439504	0.0357195	0.595722	0.0656675	0.588823	0.0334918	0.846021	0.0823572	0.825822	0.119098	0.469325	0.101323	19.0659	0.558775	0.0996455	5	17	1.96963e-06	0.00161707
28486	FP004236	0	1	0	0.500753	0.104141	0.867622	0.0553304	0.603821	0.0886568	0.744861	0.0352594	0.669188	0.127121	0.388213	0.104212	14.8885	0.586476	0.13393	5	17	1.07181e-05	0.00612006
37143	AM856815	0	1	0	0.830359	0.0519044	0.57903	0.111451	0.858718	0.163528	0.850777	0.0666735	0.602218	0.0206402	0.385821	0.0660146	16.428	0.73845	0.152832	5	17	5.51782e-06	0.0036252
6346	AM856831	hypothetical protein BRAFLDRAFT_69390 [Branchiostoma floridae]	1	0	0.545139	0.0585765	0.950249	0.142592	1.0603	0.050989	1.30816	0.0846439	1.17222	0.108782	0.837207	0.0863595	32.6218	1.40682	0.146625	5	17	3.87988e-08	5.38915e-05
10305	FP005411	0	1	0	1.29313	0.0757479	1.47394	0.103081	1.73936	0.102621	2.08576	0.103026	1.81141	0.157089	1.52122	0.0862664	28.9647	1.56926	0.184206	5	17	9.48832e-08	0.000120027
11156	FP005881	0	1	0	0.261667	0.162886	0.592827	0.0433956	0.800093	0.0494641	0.916531	0.108964	0.645607	0.107128	0.401342	0.0837479	23.3592	1.18307	0.172199	5	17	4.62356e-07	0.000479925
42679	FP005906	0	1	0	0.384571	0.0763734	0.56435	0.0143452	0.393958	0.0308595	0.701643	0.168525	0.489016	0.158808	0.022361	0.127742	17.4472	1.05489	0.20557	5	17	3.65154e-06	0.00266562
38671	FP006096	0	1	0	0.96295	0.0737325	0.904004	0.109512	1.06102	0.0785424	1.19489	0.0430882	0.897042	0.110688	0.643058	0.084239	19.0155	0.683198	0.122157	5	17	2.00654e-06	0.00163733
13153	FP006104	0	1	0	-0.0996015	0.0939484	0.0241686	0.0471765	-0.0310959	0.0238613	0.152881	0.072068	-0.0654972	0.0774091	-0.208318	0.0491664	14.386	0.294835	0.0696816	5	17	1.34679e-05	0.00738041
16989	AM856935	0	1	adductor muscle	0.459699	0.0811211	0.531112	0.0508392	0.631439	0.0416848	0.87716	0.0598098	0.683206	0.0641312	0.343631	0.0947407	29.6939	0.686394	0.0785933	5	17	7.87824e-08	0.000101472
23535	AM856936	0	1	0	1.73044	0.0564888	1.75865	0.0907759	2.09212	0.0649875	2.18126	0.0418835	2.07644	0.0368897	1.61954	0.0522672	57.4452	1.06686	0.0631439	5	17	4.76162e-10	9.0566e-07
18518	FP006133	0	1	0	0.306403	0.0348721	0.426868	0.0804029	0.21205	0.0563152	0.350685	0.0660208	0.192752	0.104882	-0.0467675	0.0756979	21.8434	0.544953	0.0848236	5	17	7.50242e-07	0.000727735
14815	FP006206	0	1	0	0.154179	0.0745444	0.245121	0.13242	0.592978	0.0993622	0.882702	0.0249137	0.663169	0.129093	0.377371	0.11962	28.576	1.48775	0.177014	5	17	1.04947e-07	0.000131184
25039	FP007042	0	1	0	1.3285	0.160028	1.60687	0.166302	1.75939	0.0568432	1.94998	0.154051	1.68019	0.0332943	1.26252	0.0651933	18.0967	1.36072	0.255652	5	17	2.83518e-06	0.00216892
7448	FP007207	0	1	0	1.00468	0.0918649	1.362	0.0720583	1.11494	0.0353944	1.28421	0.0345634	1.17755	0.0838368	1.32305	0.050692	18.133	0.373344	0.0700031	5	17	2.79588e-06	0.00214444
11345	FP007260	(sp:Q812A2) SLIT-ROBO Rho GTPase-activating protein 3 OS=Mus musculus GN=Srgap3 PE=1 SV=1	1	0	0.208735	0.0810378	0.309984	0.037195	0.0446508	0.0772594	0.233576	0.0915247	-0.00872398	0.0984857	-0.129311	0.0527575	19.6852	0.547932	0.0946381	5	17	1.57303e-06	0.00134966
37114	FP007371	0	1	0	0.641125	0.0768301	0.680604	0.123427	0.749883	0.0386701	0.805374	0.0595995	0.628254	0.13593	0.32923	0.0688125	14.4429	0.551012	0.129713	5	17	1.31198e-05	0.00726838
36039	FP007449	0	1	0	0.513713	0.00887182	0.793785	0.0394809	0.657705	0.0489604	0.803634	0.0584559	0.736456	0.0480924	0.690785	0.0540784	21.7116	0.228318	0.0357542	5	17	7.8355e-07	0.000755342
42265	FP007452	0	1	0	0.382553	0.0343196	0.733235	0.0718447	0.413883	0.0885041	0.529954	0.0755192	0.390059	0.0411955	0.499897	0.0537411	16.217	0.341917	0.0716853	5	17	6.02559e-06	0.00389855
5936	FP008012	0	1	0	0.530948	0.0613512	0.764423	0.127713	0.34586	0.0627018	0.629931	0.0950699	0.212224	0.0704571	0.0901358	0.0392988	38.249	1.27903	0.113695	5	17	1.15092e-08	1.79774e-05
19730	FP008184	0	1	0	0.633515	0.0543366	0.895565	0.0158573	0.663114	0.0553392	0.742302	0.0308515	0.927441	0.0187194	1.03177	0.0146084	73.4235	0.496592	0.0229955	5	17	6.66908e-11	1.38117e-07
14508	FP008198	0	1	0	0.00300813	0.0454959	0.440337	0.0414729	0.16159	0.11288	0.257939	0.0631587	0.303663	0.0387613	0.398952	0.115502	16.7726	0.51595	0.104589	5	17	4.78831e-06	0.00326084
41640	FP008357	0	1	0	1.38911	0.0472421	1.10296	0.0584238	1.39848	0.0459846	1.44932	0.0599371	1.29285	0.076137	0.936257	0.0715712	45.016	0.807873	0.0610176	5	17	3.25398e-09	5.63263e-06
6446	FP008634	(sp:Q6PFY8) Tripartite motif-containing protein 45 OS=Mus musculus GN=Trim45 PE=2 SV=1	1	0	1.0568	0.15187	1.38824	0.0209684	1.50524	0.0419045	1.69065	0.0716989	1.48237	0.0861802	1.13066	0.0556786	33.7508	1.14512	0.115357	5	17	2.99718e-08	4.28596e-05
37125	FP008825	0	1	hemocyte	0.967196	0.0735861	1.24772	0.118703	1.21202	0.073046	1.44599	0.103527	1.19851	0.144316	0.939876	0.0631572	15.1551	0.714508	0.160297	5	17	9.51833e-06	0.0056063
10152	FP009045	0	1	0	0.163028	0.157812	0.208386	0.0596357	0.589583	0.0566931	0.579284	0.134249	0.419448	0.0829389	0.0560795	0.136921	15.7169	1.01279	0.219094	5	17	7.45049e-06	0.0045746
14503	FP009047	0	1	0	0.15574	0.221225	0.426384	0.138641	0.635646	0.0155597	0.824369	0.0768835	0.498398	0.12967	0.172838	0.0754517	16.9142	1.36136	0.273652	5	17	4.52015e-06	0.0031189
31753	FP009204	0	1	0	1.21484	0.103209	1.59155	0.0645204	1.66243	0.0620813	1.83487	0.086076	1.70717	0.0714355	1.36029	0.078603	33.333	1.04877	0.106976	5	17	3.29463e-08	4.65531e-05
39423	FP009224	0	1	0	0.791317	0.069495	1.0508	0.0705179	1.01123	0.0600646	1.25624	0.0385185	1.02445	0.0124286	0.833972	0.0502858	36.1299	0.558699	0.0525762	5	17	1.78262e-08	2.67929e-05
23157	AM857191	(sp:Q99JW4) LIM and senescent cell antigen-like-containing domain protein 1 OS=Mus musculus GN=Lims1 PE=1 SV=3	1	0	-0.571592	0.132796	-0.301707	0.00880445	-0.494129	0.0389601	-0.420485	0.0560742	-0.642447	0.0278551	-0.677709	0.0671496	15.9967	0.386753	0.0822022	5	17	6.61199e-06	0.004192
41604	FP009375	(sp:Q24547) Syntaxin-1A OS=Drosophila melanogaster GN=Syx1A PE=1 SV=1	1	0	0.978078	0.126987	1.00503	0.119541	1.12059	0.0366699	1.36134	0.0485973	1.12691	0.124805	0.81841	0.0480173	16.0504	0.662956	0.140436	5	17	6.4634e-06	0.00413657
25327	FP009447	(sp:Q6P1G6) UPF0484 protein FAM167A OS=Mus musculus GN=Fam167a PE=2 SV=1	1	0	0.0564443	0.189278	0.331626	0.107329	0.489936	0.13383	0.797479	0.119387	0.493065	0.0694474	0.153755	0.116876	16.6567	1.41657	0.289154	5	17	5.0209e-06	0.00335396
23107	FP009690	(sp:Q24498) Ryanodine receptor 44F OS=Drosophila melanogaster GN=Rya-r44F PE=1 SV=3	1	0	1.17857	0.0229725	1.80966	0.0585089	1.37074	0.0948268	1.45492	0.0885335	1.59101	0.0415745	1.74348	0.121197	34.7463	1.12279	0.109867	5	17	2.40223e-08	3.52407e-05
25069	AM857249	(sp:Q6TFL4) Kelch-like protein 24 OS=Homo sapiens GN=KLHL24 PE=2 SV=1	1	0	0.0300782	0.114505	0.104972	0.0328318	0.326367	0.11321	0.508189	0.0477679	0.283176	0.0261235	-0.0674527	0.115235	23.7463	0.901414	0.129064	5	17	4.10337e-07	0.000432085
38940	AM857270	0	1	0	-0.19446	0.177799	0.257513	0.165899	0.390243	0.165161	0.586923	0.087651	0.2928	0.0693397	-0.0894495	0.122573	17.5552	1.7399	0.336975	5	17	3.49922e-06	0.00257193
18308	FP010137	0	1	0	0.453749	0.07224	0.708657	0.0533289	0.30913	0.147491	0.50078	0.0966497	0.257626	0.0564099	-0.0299671	0.110166	26.4745	1.24778	0.160246	5	17	1.84964e-07	0.000216778
29037	AM857271	0	1	0	-0.540343	0.145392	-0.43325	0.0515395	-0.45022	0.0623154	-0.102397	0.111344	-0.393797	0.0338088	-0.78052	0.102142	21.2955	0.963384	0.153812	5	17	8.99985e-07	0.000843286
3259	FP010274	0	1	0	0.400627	0.113977	0.619454	0.139268	0.7581	0.116821	0.991276	0.104616	0.694219	0.0625305	0.346369	0.0654365	20.0989	1.13263	0.1916	5	17	1.35802e-06	0.00118827
20345	FP010293	0	1	0	1.07667	0.0580836	1.21086	0.067753	1.23303	0.0663193	1.48133	0.0417339	1.33267	0.0600067	0.868905	0.105098	35.91	0.87294	0.0826508	5	17	1.86787e-08	2.79246e-05
21024	FP010395	0	1	0	0.603251	0.0595027	0.900371	0.0160793	0.980315	0.117164	1.08595	0.0525683	0.960277	0.0685178	0.559559	0.194955	16.9227	0.917216	0.184282	5	17	4.50477e-06	0.0031173
30664	FP010452	hypothetical protein BRAFLDRAFT_88507 [Branchiostoma floridae]	1	0	-0.900494	0.0648716	-0.622327	0.0381495	-0.640816	0.0603738	-0.543323	0.0489947	-0.73488	0.02839	-0.921349	0.149195	15.7707	0.480158	0.103517	5	17	7.2807e-06	0.00449947
26227	FP010666	0	1	0	0.382688	0.067858	0.462925	0.041558	0.61215	0.077433	0.836328	0.125328	0.699508	0.161619	0.299571	0.0576051	18.644	0.802245	0.146301	5	17	2.30373e-06	0.00183377
38534	FP010707	0	1	0	0.735392	0.0696009	0.787116	0.0760084	0.922935	0.0568628	1.1153	0.0530463	0.854511	0.0592021	0.463742	0.0280147	53.4693	0.933682	0.0593708	5	17	8.41031e-10	1.55507e-06
34006	FP010850	(sp:Q9ESN6) Tripartite motif-containing protein 2 OS=Mus musculus GN=Trim2 PE=1 SV=1	1	0	1.29975	0.074496	1.71687	0.039447	1.77997	0.0606777	1.97295	0.1217	1.82526	0.0631458	1.60426	0.0849952	33.4928	1.04855	0.106443	5	17	3.17712e-08	4.51151e-05
30295	FP010851	(sp:A2APV2) Formin-like protein 2 OS=Mus musculus GN=Fmnl2 PE=2 SV=2	1	0	-0.113504	0.0646541	0.317279	0.0489184	-0.103281	0.038677	0.00635402	0.0995367	-0.0871423	0.0303807	-0.0587866	0.0335098	30.6644	0.533422	0.0591446	5	17	6.18871e-08	8.20623e-05
37642	FP011079	0	1	0	1.09443	0.0465217	1.67916	0.0754655	1.07987	0.0799758	1.17417	0.0600032	1.12177	0.167391	1.4543	0.0888731	29.9889	1.17576	0.133302	5	17	7.31559e-08	9.49563e-05
1296	FP011335	0	1	0	0.772982	0.0613757	0.962065	0.0759585	1.16001	0.0945104	1.34849	0.0625565	1.1498	0.124834	0.776622	0.0992784	28.0439	1.0548	0.127882	5	17	1.20715e-07	0.000149325
31869	FP011515	0	1	0	0.369261	0.104434	0.628226	0.142309	0.757176	0.160401	0.968061	0.0555495	0.77743	0.0576184	0.294105	0.20182	14.4252	1.30994	0.308751	5	17	1.32269e-05	0.00731446
13799	FP011522	0	1	0	0.586491	0.0734859	0.803125	0.160797	0.913707	0.0599089	1.0231	0.0633723	0.90676	0.0651404	0.357469	0.0744133	29.084	1.21196	0.141681	5	17	9.20147e-08	0.000116767
36128	FP011637	hypothetical protein BRAFLDRAFT_82426 [Branchiostoma floridae]	1	0	1.69147	0.085625	1.91878	0.0292848	2.15484	0.029362	2.36275	0.0458525	2.25363	0.105615	1.87318	0.0675378	61.7436	1.26129	0.0694547	5	17	2.67931e-10	5.26752e-07
40070	FP011946	0	1	0	0.232641	0.151259	0.320942	0.162981	0.566369	0.0575855	0.717524	0.0421473	0.528729	0.0330066	0.220299	0.0281187	16.4456	0.813354	0.168155	5	17	5.47785e-06	0.0036099
17000	FP012188	0	1	0	0.680852	0.137352	0.882944	0.0623039	0.984422	0.090058	1.20786	0.126688	0.956931	0.107085	0.598323	0.0704497	18.4194	0.967268	0.178546	5	17	2.507e-06	0.00197301
30556	AJ130967	(sp:P12643) Bone morphogenetic protein 2 OS=Homo sapiens GN=BMP2 PE=1 SV=1	1	0	0.282136	0.141355	0.582788	0.121268	0.949267	0.0470023	1.08431	0.13213	0.80245	0.127475	0.403728	0.0870225	30.6092	1.96513	0.218283	5	17	6.27322e-08	8.31202e-05
14244	BQ426335	(sp:P21941) Cartilage matrix protein OS=Homo sapiens GN=MATN1 PE=1 SV=1	1	0	0.0281998	0.142463	0.467604	0.0658567	0.474693	0.078745	0.748224	0.105837	0.516359	0.168705	0.173701	0.123942	19.6444	1.32375	0.229112	5	17	1.59624e-06	0.00136319
10302	BQ426272	(sp:Q92038) Acyl-CoA desaturase OS=Cyprinus carpio PE=2 SV=2	1	0	1.60332	0.171421	2.08302	0.0326084	1.95095	0.0777569	2.08317	0.0865135	2.2774	0.0848035	2.17021	0.0735964	21.6304	1.03425	0.16257	5	17	8.04871e-07	0.000773481
11323	AM858770	(sp:O01761) Muscle M-line assembly protein unc-89 OS=Caenorhabditis elegans GN=unc-89 PE=1 SV=3	1	0	1.21777	0.0795188	1.19357	0.0270234	1.32507	0.0223424	1.47118	0.058136	1.31806	0.0730387	1.02513	0.125521	16.881	0.450488	0.0907329	5	17	4.58162e-06	0.00315215
23129	DW713853	(sp:O08584) Krueppel-like factor 6 OS=Mus musculus GN=Klf6 PE=2 SV=3	1	0	0.974414	0.19075	1.21885	0.115852	1.56278	0.0910023	1.72785	0.192236	1.57106	0.139926	1.07794	0.0118313	19.1365	1.82758	0.324709	5	17	1.91927e-06	0.0015834
38746	CB617351	0	1	0	0.0532234	0.0253022	0.187673	0.0352507	0.257992	0.142257	0.443335	0.0370554	0.355746	0.0382843	0.0191725	0.100983	17.5354	0.536393	0.104003	5	17	3.5267e-06	0.0025886
6051	AM853682	0	1	0	1.10467	0.078814	1.16264	0.0408799	1.16259	0.0535385	1.34372	0.018333	1.15962	0.0410584	0.93176	0.0555872	25.8842	0.349415	0.0458973	5	17	2.18413e-07	0.000250957
16426	CU682418	(sp:P12527) Arachidonate 5-lipoxygenase OS=Rattus norvegicus GN=Alox5 PE=1 SV=3	1	0	0.297753	0.111992	0.4533	0.116204	0.388584	0.0425135	0.614061	0.0855054	0.407549	0.0484306	-0.00440747	0.100449	20.5658	0.849572	0.140454	5	17	1.15387e-06	0.00103271
3640	AM866597	0	1	0	1.83804	0.0931497	1.71226	0.0634891	1.88633	0.0353047	2.00265	0.0402653	1.78269	0.0423683	1.5731	0.0278103	28.2598	0.437501	0.0526367	5	17	1.14018e-07	0.00014161
43015	EE677890	0	1	0	1.4247	0.0476286	1.55663	0.0253649	1.71455	0.0425434	1.85977	0.0456644	1.73392	0.080572	1.42892	0.0636778	46.1623	0.618703	0.0455694	5	17	2.67326e-09	4.68622e-06
19255	AM857895	0	1	0	1.10037	0.037249	0.890703	0.0287791	1.0608	0.0182176	1.05902	0.0465775	0.967039	0.0329609	0.805607	0.0483194	38.3402	0.263063	0.0233283	5	17	1.13001e-08	1.77185e-05
23287	AM857938	0	1	0	1.13937	0.141314	1.43883	0.162614	1.85645	0.138855	2.13266	0.220198	1.78255	0.243826	1.34862	0.0279621	19.8035	2.70137	0.46379	5	17	1.50792e-06	0.00130435
18036	AM854381	(sp:Q08094) Calponin-2 (Fragment) OS=Sus scrofa GN=CNN2 PE=2 SV=1	1	0	1.22493	0.0752948	1.26533	0.0426006	1.48421	0.114633	1.61285	0.0473871	1.53018	0.073714	1.16512	0.147505	15.5167	0.660608	0.144752	5	17	8.12366e-06	0.00493918
542	CU683682	0	1	0	-0.162518	0.0794155	-0.401794	0.13726	0.202824	0.127348	0.287089	0.210032	0.154471	0.0395892	-0.106135	0.0642017	16.9961	1.35936	0.271935	5	17	4.3729e-06	0.00303917
1947	BQ426244	0	1	0	1.18279	0.122243	1.27687	0.0708515	1.3462	0.0887967	1.55973	0.0292499	1.42984	0.0742339	1.06303	0.0597746	19.2364	0.610197	0.107851	5	17	1.85035e-06	0.00154319
15307	AM857675	0	1	0	1.88905	0.0160808	1.70183	0.0321313	1.98629	0.059051	2.09287	0.0343751	1.91061	0.0511477	1.57346	0.147737	27.6342	0.720037	0.0885903	5	17	1.34663e-07	0.000164962
26066	CX068932	0	1	0	1.68302	0.0152375	1.9687	0.0504172	1.7561	0.0769146	1.86475	0.0430122	1.96995	0.0434349	2.06463	0.0708851	27.5953	0.409605	0.0504672	5	17	1.3608e-07	0.000166562
12852	FP000163	0	1	0	0.25108	0.108176	0.495587	0.0911974	0.563765	0.141198	0.767538	0.0819225	0.558394	0.094505	0.191853	0.0800241	17.5951	0.916374	0.177076	5	17	3.44478e-06	0.0025388
27662	BQ426936	0	1	0	0.71369	0.194898	0.764739	0.063317	0.944001	0.070694	1.24399	0.115133	1.01588	0.131063	0.612801	0.0950657	14.7511	1.05084	0.24221	5	17	1.14021e-05	0.0064194
38792	EE677605	0	1	0	0.961829	0.12137	0.960392	0.116374	1.2395	0.0599661	1.37111	0.0748961	1.20492	0.029572	0.990284	0.0602422	16.3138	0.600124	0.125073	5	17	5.78633e-06	0.0037669
6900	AM860394	0	1	0	1.01453	0.0697094	1.08006	0.0524039	1.20463	0.0458476	1.40059	0.0443966	1.24087	0.0286341	0.930174	0.0421285	46.3288	0.572299	0.0420001	5	17	2.59896e-09	4.56897e-06
37541	CU685053	(sp:Q63340) Dual specificity protein phosphatase 7 (Fragment) OS=Rattus norvegicus GN=Dusp7 PE=2 SV=1	1	0	0.348232	0.0739389	0.465788	0.0660397	0.749536	0.0812882	0.851899	0.0456399	0.739737	0.113827	0.340309	0.122594	26.4264	0.983669	0.126558	5	17	1.87466e-07	0.000219147
12590	BQ426382	0	1	0	1.55673	0.0394714	1.24482	0.0797797	1.55653	0.0639703	1.56278	0.0564207	1.40043	0.0615327	1.06712	0.0688957	42.4556	0.84171	0.0674073	5	17	5.13505e-09	8.53959e-06
43876	EE677593	0	1	0	0.915534	0.0537619	0.904957	0.147047	0.942873	0.067611	1.23181	0.0191789	1.04751	0.0583129	0.609929	0.100366	22.1899	0.818274	0.125378	5	17	6.70019e-07	0.000659969
43487	AM855961	(sp:O16011) Protein muscleblind OS=Drosophila melanogaster GN=mbl PE=1 SV=2	1	0	0.433375	0.106616	0.698417	0.0874683	0.340245	0.0535957	0.633092	0.0298424	0.327608	0.0535801	0.0243241	0.130162	31.8086	1.1686	0.124911	5	17	4.69588e-08	6.37232e-05
1155	DV736722	0	1	0	0.736334	0.0748362	0.858936	0.045912	1.02244	0.0767051	1.24832	0.0776726	1.04348	0.151009	0.693244	0.170397	15.4844	0.872536	0.191588	5	17	8.23865e-06	0.00499262
11059	FP002429	B-box zinc finger family protein [Trichomonas vaginalis G3]	1	0	0.779551	0.109467	1.10795	0.0481085	1.20288	0.0966077	1.39058	0.0596216	1.18925	0.0536615	0.984538	0.0138865	33.5607	0.867579	0.0878935	5	17	3.12863e-08	4.44891e-05
476	AM857299	(sp:Q801P0) LIM domain transcription factor LMO4-B OS=Xenopus laevis GN=lmo4-B PE=2 SV=1	1	0	0.266927	0.146122	0.489574	0.0708493	0.539615	0.0139555	0.8538	0.0360094	0.613692	0.0466327	0.323377	0.111997	23.987	0.885878	0.125567	5	17	3.81313e-07	0.000407624
18684	CU685473	0	1	0	0.649498	0.115357	0.839349	0.085532	1.10449	0.0827934	1.25142	0.139412	1.13948	0.14784	0.791828	0.0484198	19.1103	1.07629	0.191487	5	17	1.93776e-06	0.00159671
12900	CU683452	"(sp:P24733) Myosin heavy chain, striated muscle OS=Aequipecten irradians PE=1 SV=1"	1	adductor muscle	0.758168	0.0689885	0.850089	0.0898017	0.692736	0.0110368	0.803351	0.105663	0.705821	0.0524088	0.384003	0.0984048	17.3718	0.54606	0.106875	5	17	3.76227e-06	0.00272388
20049	CU685408	0	1	0	0.821348	0.0408869	1.11178	0.0288463	1.02442	0.0837458	1.14518	0.047485	1.22372	0.0425253	1.18158	0.0506561	29.4702	0.404185	0.046631	5	17	8.33707e-08	0.000107131
38151	CU683195	0	1	mantle	-0.367142	0.144783	-0.259413	0.136295	0.220238	0.152856	0.281259	0.198145	0.152202	0.0268934	-0.182604	0.0955729	15.1639	1.49562	0.335344	5	17	9.48155e-06	0.0056036
13643	FP002713	0	1	0	1.55067	0.0512752	1.66272	0.0779442	1.75579	0.0800903	1.94741	0.123627	1.8632	0.10631	1.42767	0.0346468	21.0764	0.727831	0.117412	5	17	9.68965e-07	0.00088951
26371	CU986574	0	1	0	0.625757	0.0627888	0.93844	0.0373308	0.72028	0.0356783	0.769912	0.0156431	0.793149	0.062257	0.901816	0.0336748	28.6333	0.267088	0.0317148	5	17	1.03392e-07	0.000129447
23052	AM859173	(sp:Q1PRL4) Tripartite motif-containing protein 71 OS=Gallus gallus GN=TRIM71 PE=2 SV=1	1	0	0.166756	0.0298607	0.53847	0.118848	0.586735	0.0939893	0.757338	0.12205	0.575442	0.0658934	0.356256	0.0556932	21.3741	0.843835	0.134229	5	17	8.76571e-07	0.000829236
11003	AM857878	(sp:O43736) Integral membrane protein 2A OS=Homo sapiens GN=ITM2A PE=1 SV=2	1	0	1.24396	0.0975408	1.54641	0.0308438	1.43833	0.033486	1.62211	0.0423183	1.64793	0.0586554	1.60015	0.0508843	27.8542	0.448793	0.0547817	5	17	1.26964e-07	0.000156292
26022	AM856291	(sp:Q9BE45) NF-kappa-B inhibitor zeta OS=Bos taurus GN=NFKBIZ PE=2 SV=2	1	0	1.49901	0.0974832	1.78936	0.0258965	1.72457	0.0527258	1.94463	0.0756704	1.77995	0.0152526	1.73754	0.0627867	20.643	0.414868	0.0683306	5	17	1.12354e-06	0.00100894
24914	ES789805	0	1	0	1.32668	0.0570827	1.3273	0.0718771	1.31856	0.0468789	1.5099	0.0705663	1.39013	0.0168425	1.16019	0.024296	17.6592	0.255249	0.0491442	5	17	3.35928e-06	0.00248587
286	BQ427044	(sp:P34714) SPARC OS=Caenorhabditis elegans GN=ost-1 PE=1 SV=1	1	0	1.08271	0.0678851	1.1985	0.0770603	1.46285	0.160675	1.58808	0.183955	1.36493	0.11738	0.897051	0.137691	14.9342	1.29594	0.295041	5	17	1.05014e-05	0.0060383
3302	CU682512	0	1	0	0.58132	0.181221	0.798545	0.062615	0.863508	0.0387579	1.13938	0.0292957	0.91595	0.0875588	0.610361	0.0286016	21.3292	0.847861	0.135154	5	17	8.89847e-07	0.000836457
43262	CU989574	0	1	0	1.69371	0.185127	1.89235	0.0773819	1.86034	0.0360753	2.11936	0.0558115	1.86416	0.0922985	1.53736	0.113229	13.8882	0.774184	0.189529	5	17	1.69904e-05	0.00878403
8260	AM858220	hypothetical protein BRAFLDRAFT_69778 [Branchiostoma floridae]	1	0	1.6932	0.0748573	1.9557	0.0867093	2.19739	0.0287184	2.40062	0.0515218	2.27197	0.0842449	1.83149	0.0492135	69.7614	1.46221	0.0712644	5	17	1.00699e-10	2.04621e-07
26876	CU684445	(sp:Q9U943) Apolipophorins OS=Locusta migratoria PE=1 SV=2	1	digestive gland	0.379874	0.148304	0.779755	0.150092	1.18759	0.131183	1.22873	0.0744254	1.53756	0.127102	1.15497	0.141187	35.0821	3.03275	0.29392	5	17	2.23227e-08	3.30153e-05
30132	BQ426397	(sp:P57074) Transcription factor SOX-8 OS=Gallus gallus GN=SOX8 PE=2 SV=1	1	0	0.0176839	0.0938265	0.215988	0.0670678	0.211733	0.0946092	0.400948	0.0567741	0.152753	0.0569657	-0.129165	0.108309	19.1631	0.665689	0.11811	5	17	1.90064e-06	0.00157373
4855	BM986716	0	1	0	1.41404	0.0492043	1.41058	0.0513374	1.46595	0.0387769	1.57995	0.0356121	1.36244	0.079352	1.09521	0.0381078	43.8319	0.521284	0.0404355	5	17	4.00608e-09	6.79831e-06
20237	FP003034	0	1	0	0.50784	0.053305	0.633121	0.0397877	0.884294	0.075414	1.14555	0.0493534	0.906423	0.113945	0.556207	0.155504	30.0819	1.20464	0.136154	5	17	7.14769e-08	9.32059e-05
26538	BQ426874	0	1	0	0.751283	0.192074	1.01442	0.0865458	1.13186	0.131933	1.37306	0.129911	1.34033	0.16785	0.69215	0.0826581	17.0413	1.56801	0.312841	5	17	4.2938e-06	0.00299278
27908	CK172392	0	1	0	1.15323	0.0787657	0.896463	0.0411701	1.22544	0.0507587	1.23215	0.0303992	1.01944	0.0602672	0.814792	0.0893329	31.9787	0.615158	0.0654041	5	17	4.5105e-08	6.15232e-05
11993	AM863779	0	1	0	-0.0955224	0.19452	0.595685	0.100095	0.115614	0.134927	0.364732	0.0488755	0.389867	0.120301	0.625194	0.129649	18.5642	1.55461	0.284725	5	17	2.37375e-06	0.00187526
14758	AB289857	(sp:P97481) Endothelial PAS domain-containing protein 1 OS=Mus musculus GN=Epas1 PE=1 SV=2	1	0	1.46775	0.0219765	1.51101	0.0706319	1.61232	0.0685619	1.77196	0.0300774	1.69884	0.0692764	1.51543	0.020816	21.3331	0.276891	0.04413	5	17	8.88709e-07	0.000836275
4735	AM859336	0	1	0	-0.100695	0.0609459	-0.10285	0.0761779	0.0645679	0.0220983	0.269613	0.0472207	0.0208668	0.0758428	-0.0632425	0.095018	18.1893	0.402819	0.0752963	5	17	2.73635e-06	0.00211246
24033	AM859991	(sp:O35929) GTP-binding protein REM 1 OS=Mus musculus GN=Rem1 PE=1 SV=1	1	0	0.0379394	0.0119078	0.293447	0.0783353	0.180401	0.101098	0.46168	0.138956	0.332767	0.143215	-0.0267401	0.0711899	13.9712	0.67246	0.163648	5	17	1.63377e-05	0.00852829
32622	FP000851	0	1	0	0.0033397	0.0144828	0.255653	0.0255618	0.0169545	0.0912456	0.191602	0.110819	0.245832	0.083052	0.379139	0.0287175	17.962	0.426219	0.0806786	5	17	2.98612e-06	0.00226348
26101	AM860315	0	1	0	0.901105	0.0827776	0.807045	0.103974	1.09373	0.0563651	1.18991	0.0302051	1.03484	0.0638534	0.634122	0.0309707	36.6499	0.822344	0.0762886	5	17	1.5978e-08	2.43345e-05
23687	AM853883	0	1	0	0.410998	0.0793283	0.45989	0.0859866	0.512525	0.0678062	0.765209	0.0467966	0.520484	0.0476015	0.128543	0.065686	36.3418	0.843328	0.0788986	5	17	1.70458e-08	2.57222e-05
29753	BQ426556	(sp:Q5XFX0) Transgelin-2 OS=Rattus norvegicus GN=Tagln2 PE=1 SV=1	1	0	1.83575	0.0886518	1.83603	0.049214	1.98176	0.0533032	2.2142	0.0473218	2.1192	0.180227	1.73618	0.0831887	16.9193	0.655922	0.13181	5	17	4.5109e-06	0.00311704
13012	BQ426690	0	1	0	1.82074	0.057839	1.92127	0.0441743	2.10588	0.0549902	2.26584	0.0686438	2.01911	0.0636007	1.82436	0.0296268	41.205	0.603789	0.0498212	5	17	6.47614e-09	1.05691e-05
40510	CU999247	0	1	0	0.654834	0.121873	0.872945	0.0676154	0.870117	0.0276082	1.11482	0.0906798	0.819706	0.074912	0.537198	0.0577422	25.4288	0.796192	0.106456	5	17	2.4885e-07	0.000280454
15389	AM857168	(sp:Q8CDG5) UPF0474 protein C5orf41 homolog OS=Mus musculus PE=2 SV=1	1	0	1.08868	0.0732815	1.30076	0.0652283	1.59837	0.101911	1.70493	0.107454	1.55092	0.0919006	1.21358	0.0881825	29.3258	1.16347	0.134892	5	17	8.6493e-08	0.000110711
21275	EE677430	0	1	0	1.0058	0.104426	1.14833	0.0606995	1.23092	0.0902669	1.36282	0.0547927	1.35068	0.0547403	0.879027	0.0762679	23.7969	0.704543	0.100662	5	17	4.04046e-07	0.000426672
23707	AM855246	0	1	0	1.62369	0.0220471	1.32225	0.0931638	1.55627	0.013537	1.70923	0.0488799	1.5649	0.0898684	1.19582	0.029943	47.596	0.75673	0.0540566	5	17	2.1036e-09	3.73811e-06
36004	AM858772	hypothetical protein [Schistosoma mansoni]	1	0	0.997122	0.059411	1.09376	0.097993	1.27055	0.0889493	1.43559	0.0565866	1.30143	0.0938581	0.998632	0.050216	21.9897	0.633321	0.0979226	5	17	7.1513e-07	0.000697967
2604	CU683354	"(sp:P18091) Alpha-actinin, sarcomeric OS=Drosophila melanogaster GN=Actn PE=2 SV=2"	1	0	1.3901	0.0629196	1.32479	0.0302272	1.44273	0.0492668	1.59957	0.0633971	1.36632	0.0377007	1.10088	0.0479359	41.3575	0.531482	0.0436932	5	17	6.29335e-09	1.0277e-05
35800	AM856861	0	1	0	0.839854	0.0873624	0.944984	0.0659969	1.18545	0.0420955	1.32198	0.0594964	1.09819	0.203135	0.765287	0.0542031	21.4638	0.904262	0.143241	5	17	8.50709e-07	0.000809025
44611	AM855874	"(sp:P70085) Steroid 17-alpha-hydroxylase/17,20 lyase OS=Oryzias latipes GN=cyp17a1 PE=2 SV=1"	1	0	-0.333294	0.22071	-0.114278	0.0969268	0.442486	0.130813	0.482102	0.26465	0.237831	0.138368	-0.0630169	0.104808	14.4236	2.15091	0.507023	5	17	1.32368e-05	0.0073067
39977	EW777385	0	1	0	0.581231	0.070635	0.737502	0.100859	0.929785	0.066364	1.08727	0.0786229	0.964252	0.043799	0.570484	0.0889132	29.0565	0.895588	0.104796	5	17	9.26674e-08	0.000117502
36421	AM858919	0	1	0	1.30455	0.0167085	1.45288	0.231918	1.92794	0.138258	2.12236	0.151624	1.87351	0.10919	1.43396	0.0704874	22.3699	2.15318	0.327261	5	17	6.32151e-07	0.000628358
8999	FP005373	0	1	0	0.75766	0.0285509	1.09605	0.0292178	0.76834	0.0166578	0.943271	0.0481868	1.00816	0.0694344	1.12153	0.169136	15.4834	0.493048	0.108268	5	17	8.24199e-06	0.0049864
28128	DV736932	0	1	0	1.34443	0.0680305	1.49082	0.0474241	1.57092	0.0623532	1.74937	0.0526007	1.64971	0.0616224	1.48153	0.0642354	21.9679	0.391346	0.0605691	5	17	7.20242e-07	0.000700795
4464	ES789495	0	1	0	1.61988	0.0889799	1.97586	0.0482158	2.13719	0.0500696	2.31532	0.124672	2.17301	0.059248	1.87611	0.0619079	39.5401	1.20243	0.103396	5	17	8.91026e-09	1.42475e-05
37150	ES789407	0	1	0	0.766541	0.0774604	0.692838	0.0849315	0.932211	0.0882042	1.05761	0.0574542	0.913991	0.0687489	0.705447	0.0393833	16.4315	0.420402	0.0869893	5	17	5.50982e-06	0.00362546
17312	AM860643	0	1	0	1.41211	0.0638766	1.21694	0.0661272	1.34776	0.0679842	1.37468	0.0427375	1.1971	0.0340253	1.10588	0.0487135	17.6988	0.28182	0.0541386	5	17	3.30763e-06	0.00245757
20124	CU682808	0	1	0	0.965906	0.0936118	1.07029	0.0811341	1.21546	0.101573	1.46159	0.0768394	1.18473	0.0893474	0.953371	0.0557134	20.4733	0.722465	0.11998	5	17	1.19144e-06	0.00105919
3457	FP091046	(sp:Q8JGT9) Tigrin OS=Rhabdophis tigrinus tigrinus PE=1 SV=1	1	0	-0.393722	0.171074	-0.437515	0.301748	0.327729	0.169158	0.444571	0.161404	0.301017	0.0989896	-0.177489	0.148145	16.7313	3.00371	0.61039	5	17	4.8698e-06	0.00329198
34243	CD526865	0	1	0	0.241706	0.103615	0.451154	0.0653904	0.0770861	0.123874	0.319609	0.112838	0.0326248	0.0971068	-0.258412	0.0628964	26.3775	1.24125	0.159994	5	17	1.90042e-07	0.000220639
12867	AM853962	0	1	0	0.753732	0.0641985	0.946321	0.0486112	0.93706	0.037825	1.13032	0.0798095	1.04303	0.0254528	0.703392	0.0196768	39.2875	0.523582	0.0453116	5	17	9.36222e-09	1.49234e-05
14982	AM856687	(sp:Q9VUL9) Glycoprotein 3-alpha-L-fucosyltransferase A OS=Drosophila melanogaster GN=FucTA PE=1 SV=2	1	0	-0.325486	0.192926	0.222965	0.0428655	0.149627	0.156671	0.270367	0.0655006	0.0916395	0.0914255	-0.224873	0.113857	15.9179	1.21392	0.259289	5	17	6.83697e-06	0.00430729
24901	AM861741	0	1	0	0.75333	0.123795	0.909536	0.149285	1.06292	0.0473441	1.27665	0.0449056	1.10288	0.0645054	0.640232	0.105577	22.203	1.09297	0.167369	5	17	6.67172e-07	0.000658499
39025	CU683433	0	1	0	0.14853	0.0287995	0.395733	0.0497802	0.0113418	0.0646777	0.240444	0.0893076	0.229303	0.0283864	0.233206	0.0645777	17.8597	0.317914	0.060522	5	17	3.10666e-06	0.0023331
41357	CU684059	0	1	0	-0.003339	0.0261469	0.240126	0.0278139	-0.128278	0.0565195	-0.0448547	0.0613557	-0.0139781	0.0329154	0.110069	0.0553773	31.1131	0.335066	0.0366156	5	17	5.54786e-08	7.42859e-05
415	FP004975	0	1	0	0.390838	0.0847694	0.611634	0.110194	0.51235	0.0385795	0.725692	0.0456013	0.531966	0.0477885	0.229956	0.0442935	25.6307	0.59661	0.0791424	5	17	2.34806e-07	0.00026674
10625	AM859236	0	1	0	0.495137	0.0839784	0.781409	0.1025	0.570139	0.0179782	0.811301	0.0603935	0.655126	0.050212	0.444774	0.0564561	19.27	0.448832	0.0791921	5	17	1.8278e-06	0.00153352
25674	CU987894	0	1	0	1.44682	0.07026	1.31902	0.0917344	1.49587	0.0378787	1.61944	0.0884444	1.48523	0.0676798	1.22085	0.0514369	15.8303	0.395408	0.084925	5	17	7.09726e-06	0.0044003
35807	EW779302	(sp:Q8CAL5) Glypican-5 OS=Mus musculus GN=Gpc5 PE=2 SV=1	1	0	0.259862	0.137969	0.568105	0.0654341	0.71052	0.0676592	0.952793	0.0384936	0.687869	0.0613642	0.304912	0.0394704	46.4856	1.37179	0.100334	5	17	2.53114e-09	4.45227e-06
39598	EW777823	0	1	0	0.91804	0.0653662	1.25157	0.0320746	0.985251	0.0466447	1.10964	0.0706236	1.06826	0.0222625	1.17297	0.0264271	24.9033	0.296505	0.0404813	5	17	2.90017e-07	0.000320759
26470	AM860166	0	1	0	0.0955911	0.0976196	0.506812	0.0641919	0.709241	0.19298	0.826942	0.162804	0.608543	0.0950023	0.196688	0.176141	16.3957	1.65557	0.343318	5	17	5.59235e-06	0.00366299
16995	AM860276	(sp:Q91145) Collagen alpha-1(XII) chain (Fragment) OS=Notophthalmus viridescens PE=2 SV=1	1	0	0.958448	0.0822847	1.10995	0.115776	0.978624	0.0742413	1.25284	0.123779	1.12006	0.0685916	0.57526	0.0858639	23.6891	1.07682	0.154551	5	17	4.17593e-07	0.000438055
14925	AM860424	(sp:A2ASS6) Titin OS=Mus musculus GN=Ttn PE=1 SV=1	1	adductor muscle	0.485614	0.0880989	0.691808	0.149178	0.392165	0.141126	0.616054	0.100288	0.454448	0.0710714	0.0575839	0.106679	14.8404	0.978646	0.224212	5	17	1.09523e-05	0.00618807
10628	AM860661	0	1	0	0.449183	0.0181605	0.87758	0.0551767	0.563561	0.106692	0.737498	0.0581295	0.535991	0.120655	0.511538	0.0665599	18.1881	0.51791	0.0968157	5	17	2.73758e-06	0.00211068
28441	AM861051	B-box zinc finger family protein [Brugia malayi]	1	0	-0.334827	0.0403826	-0.00950104	0.0933031	-0.0176535	0.0358435	0.0271817	0.114165	0.0395245	0.0847699	-0.247563	0.0987302	14.1783	0.490314	0.117579	5	17	1.48278e-05	0.0078884
4647	AM861607	0	1	0	1.30424	0.0387035	1.46007	0.0224357	1.45441	0.0414625	1.61959	0.0231284	1.5722	0.0961557	1.37817	0.0207108	27.5385	0.263598	0.0325448	5	17	1.38179e-07	0.000168855
11327	AM861625	0	1	0	-0.140386	0.130154	0.0694051	0.0887839	0.232418	0.0852285	0.4467	0.0875024	0.172294	0.110468	-0.180757	0.122957	20.0873	1.11657	0.188991	5	17	1.36357e-06	0.00119176
25998	AM862081	0	1	0	0.293349	0.0660226	0.427865	0.0726444	0.295408	0.074072	0.470552	0.0698466	0.283744	0.0303274	-0.0314531	0.0603984	28.9624	0.62003	0.0727876	5	17	9.49407e-08	0.000120005
11684	AM862532	0	1	mantle	0.943658	0.122322	1.21971	0.189019	1.50239	0.120136	1.74446	0.0479676	1.42252	0.167264	0.953759	0.114718	22.9659	2.01092	0.297708	5	17	5.2286e-07	0.000533317
24519	AM862546	0	1	0	0.419683	0.196001	0.616727	0.105095	0.809653	0.0515207	0.966551	0.109273	0.729443	0.0782228	0.289198	0.102654	18.0584	1.25357	0.236021	5	17	2.87719e-06	0.0021953
6663	AM862751	0	1	0	-0.0824856	0.254007	-0.0759711	0.215761	0.611585	0.137562	0.625678	0.111659	0.562145	0.0223663	0.229006	0.1152	15.8998	2.18951	0.468204	5	17	6.88992e-06	0.00431309
28436	AM863048	0	1	0	0.743751	0.187763	1.06348	0.0355489	1.13499	0.0447915	1.34617	0.0813944	1.23803	0.106308	0.90287	0.0921342	17.4814	0.943578	0.183519	5	17	3.6026e-06	0.0026371
40537	AM863180	0	1	0	1.07188	0.0564934	0.816499	0.0703428	0.941102	0.0387387	1.02435	0.0453971	0.944784	0.0600566	0.658036	0.0771857	25.6139	0.453441	0.0601901	5	17	2.35943e-07	0.000267795
17334	AM853579	(sp:Q1ECW2) Neuronal PAS domain-containing protein 4 OS=Danio rerio GN=npas4 PE=2 SV=1	1	0	0.00348189	0.101656	0.109645	0.0385257	0.252981	0.0855325	0.363196	0.0223949	0.382221	0.105259	-0.0414143	0.0916091	19.7205	0.616218	0.106242	5	17	1.5533e-06	0.00133583
11471	AM863726	0	1	0	-0.931908	0.10795	-0.108816	0.0629902	-0.735006	0.1236	-0.717692	0.0549418	-0.360503	0.13372	-0.0338527	0.0932588	55.9479	2.69214	0.163603	5	17	5.87305e-10	1.10531e-06
21824	AM864797	0	1	0	0.413706	0.0267956	0.55043	0.0729526	0.486603	0.0862348	0.728502	0.133095	0.62994	0.121935	0.184544	0.0593079	17.7081	0.697187	0.133862	5	17	3.29558e-06	0.00245191
15501	AM865375	0	1	0	0.43727	0.0604124	0.636072	0.190222	0.851511	0.114857	1.03788	0.0993505	0.679411	0.0576138	0.238545	0.157925	20.4554	1.6253	0.27015	5	17	1.19884e-06	0.00106337
7386	AM865407	(sp:Q8N474) Secreted frizzled-related protein 1 OS=Homo sapiens GN=SFRP1 PE=1 SV=1	1	0	0.431937	0.105525	0.566174	0.0620234	0.776861	0.0976409	1.03653	0.0820515	0.851325	0.0548622	0.403521	0.151968	24.8503	1.23556	0.169048	5	17	2.94575e-07	0.000324621
20651	AM865427	(sp:Q28658) Small proline-rich protein 3 OS=Oryctolagus cuniculus GN=SPRR3 PE=2 SV=1	1	0	-0.0571494	0.175665	0.0376656	0.292185	0.760293	0.119831	0.862956	0.225549	0.743489	0.0809342	0.287103	0.0973572	18.1468	3.12724	0.585922	5	17	2.78114e-06	0.00213591
21331	AM865577	0	1	0	0.279952	0.0445794	0.590436	0.0811287	0.0910761	0.115746	0.196504	0.0481853	0.226466	0.072762	0.297579	0.11086	15.9881	0.565806	0.120323	5	17	6.63599e-06	0.00420058
13275	AM865987	0	1	0	1.88962	0.0595224	2.09936	0.0582602	1.95717	0.0531519	2.20302	0.070873	1.9633	0.022114	1.69349	0.0635307	36.4904	0.616498	0.0574424	5	17	1.65212e-08	2.50626e-05
13877	AM866185	0	1	0	0.279558	0.0812595	0.681779	0.0663934	0.433751	0.0736237	0.581404	0.0425104	0.454344	0.0294607	0.313909	0.0599888	23.9662	0.474024	0.0672481	5	17	3.83729e-07	0.000409439
36008	AM866731	0	1	0	0.902365	0.0231894	1.03107	0.0501837	1.38205	0.107734	1.54557	0.0349058	1.48276	0.172949	1.1185	0.0379002	40.1405	1.31963	0.111776	5	17	7.9308e-09	1.28162e-05
39384	AM866919	0	1	0	0.0178236	0.0981053	0.601335	0.0580896	0.173428	0.114937	0.331393	0.0648397	0.492004	0.00242308	0.648624	0.0449439	42.8262	1.22574	0.0973125	5	17	4.79951e-09	8.03918e-06
37958	AM867542	0	1	0	1.12001	0.0694073	1.33698	0.0887037	1.46706	0.103253	1.60293	0.0844363	1.58577	0.0685027	1.45408	0.0673378	18.3442	0.617326	0.114418	5	17	2.57946e-06	0.00201713
6395	AM867786	hypothetical protein BRAFLDRAFT_69764 [Branchiostoma floridae]	1	0	0.942768	0.122913	1.22872	0.11009	1.39866	0.0486222	1.61616	0.0630675	1.37777	0.0477224	1.02383	0.0899919	32.9474	1.25546	0.129558	5	17	3.59865e-08	5.0453e-05
20065	AM867888	0	1	0	0.68139	0.113997	0.723592	0.0710526	0.852722	0.0856311	1.12251	0.1112	0.87583	0.0449833	0.549299	0.028529	22.0201	0.775333	0.119715	5	17	7.0807e-07	0.000691784
32969	AM868303	0	1	0	0.14148	0.123719	0.347162	0.0830847	0.429111	0.0566975	0.534081	0.0519179	0.337476	0.117057	-0.00363881	0.0769905	20.1533	0.767876	0.129546	5	17	1.33228e-06	0.00116974
25826	AM853964	0	1	0	0.308913	0.0241496	0.40493	0.0482961	0.295699	0.0773117	0.448617	0.0722499	0.353582	0.136943	-0.000276654	0.0607803	18.773	0.502055	0.0909279	5	17	2.19528e-06	0.00176062
37517	AM853979	(sp:P50132) G-protein coupled receptor 4 OS=Sus scrofa GN=GPR4 PE=3 SV=1	1	0	-0.662996	0.030021	-0.487784	0.104073	-0.0366829	0.0616274	0.0830735	0.0908148	-0.125643	0.0588264	-0.437968	0.165378	35.9366	1.69435	0.160304	5	17	1.85735e-08	2.78046e-05
38823	AM869153	0	1	0	1.47623	0.122054	1.73833	0.0384533	1.99305	0.0857046	2.19291	0.089123	2.0048	0.036648	1.64103	0.0502838	45.2684	1.40151	0.105264	5	17	3.11492e-09	5.40439e-06
7071	AM869380	(sp:Q05793) Basement membrane-specific heparan sulfate proteoglycan core protein OS=Mus musculus GN=Hspg2 PE=1 SV=1	1	0	0.166087	0.0986806	0.218846	0.0884113	0.0547711	0.0474422	0.264834	0.036829	0.16795	0.108688	-0.184003	0.0383811	19.4556	0.523757	0.0915302	5	17	1.70861e-06	0.00144378
24815	BQ426348	(sp:Q90837) Transcriptional regulator Erg OS=Gallus gallus GN=ERG PE=2 SV=1	1	0	1.19194	0.155033	1.44651	0.168519	1.61739	0.0871511	1.81894	0.11926	1.55	0.0539908	1.13198	0.112995	17.2849	1.35682	0.26689	5	17	3.89448e-06	0.00279624
40268	BQ426535	0	1	0	0.0556671	0.165308	0.316979	0.0957708	0.370088	0.061846	0.652588	0.113847	0.35806	0.178524	0.0197381	0.103216	14.3683	1.07998	0.255557	5	17	1.35778e-05	0.0074135
36347	BQ426630	(sp:Q8NFW1) Collagen alpha-1(XXII) chain OS=Homo sapiens GN=COL22A1 PE=1 SV=1	1	0	0.483297	0.0466523	0.810026	0.153063	0.755871	0.0871327	1.10071	0.144468	0.773569	0.0912462	0.430048	0.062183	21.1733	1.18605	0.190456	5	17	9.37756e-07	0.000870237
23466	BQ426746	0	1	0	0.2116	0.0784867	0.368097	0.0975	0.213316	0.0483513	0.41412	0.0629909	0.280473	0.109918	-0.0691649	0.104739	16.0207	0.579529	0.122991	5	17	6.54512e-06	0.0041627
28100	BQ426811	0	1	0	0.776327	0.202135	1.03119	0.100037	1.06119	0.0446511	1.41928	0.0819102	1.14442	0.125412	0.6477	0.125946	19.5207	1.47984	0.257751	5	17	1.66891e-06	0.00141356
13640	BQ427065	0	1	0	-0.356457	0.128178	-0.300575	0.0445981	-0.470608	0.0405018	-0.314522	0.0465373	-0.518263	0.0490758	-0.673166	0.0993302	13.7147	0.407773	0.101091	5	17	1.84519e-05	0.00937356
5032	CU683161	(sp:A2ASS6) Titin OS=Mus musculus GN=Ttn PE=1 SV=1	1	adductor muscle	0.430199	0.143342	0.76953	0.14361	0.328785	0.149137	0.619045	0.0974987	0.401492	0.0673627	0.0502343	0.0974266	16.2354	1.22389	0.256307	5	17	5.97933e-06	0.00388059
35091	CU683217	0	1	0	1.10947	0.0473853	1.2389	0.0286657	1.0938	0.0155131	1.25846	0.0592345	1.32451	0.0469955	1.40956	0.0431586	32.4845	0.290971	0.0304546	5	17	4.00571e-08	5.53989e-05
10738	CU683219	hypothetical protein BRAFLDRAFT_69764 [Branchiostoma floridae]	1	0	0.823472	0.177692	1.19838	0.0700099	1.20908	0.0473772	1.45249	0.133877	1.22346	0.144987	0.983484	0.0670806	14.2101	0.942349	0.225473	5	17	1.46099e-05	0.00780168
11322	CU683266	(sp:Q9H6T0) Epithelial splicing regulatory protein 2 OS=Homo sapiens GN=ESRP2 PE=1 SV=1	1	0	0.75663	0.0762949	0.420421	0.112062	0.689888	0.0157403	0.655308	0.0708673	0.31913	0.117654	-0.0255715	0.171584	31.2637	1.71909	0.186955	5	17	5.34967e-08	7.21671e-05
38459	CU683480	0	1	0	0.627435	0.0683833	1.25916	0.115935	0.809073	0.0926955	0.978542	0.118214	0.928529	0.0699406	1.02007	0.139943	16.0316	0.898659	0.190589	5	17	6.51491e-06	0.00415651
4334	CU684113	(sp:P22488) Non-neuronal cytoplasmic intermediate filament protein OS=Helix aspersa PE=3 SV=2	1	0	-0.59755	0.0455754	-0.632423	0.0415605	-0.45456	0.0692236	-0.218545	0.0303347	-0.364784	0.0568087	-0.51588	0.151291	15.2842	0.466036	0.103671	5	17	8.99204e-06	0.00536825
13649	CU684277	0	1	0	0.485263	0.046825	0.264106	0.0821709	0.342018	0.098763	0.329377	0.0791146	0.0917852	0.115853	-0.193587	0.0460649	35.5312	1.12951	0.108083	5	17	2.02564e-08	3.00606e-05
29879	CU684312	0	1	0	0.657731	0.0497976	1.11726	0.0543447	0.727786	0.12171	0.843497	0.0252782	0.842275	0.04645	0.551845	0.135343	21.2008	0.760268	0.121925	5	17	9.29091e-07	0.000864054
35357	CU684487	0	1	0	0.531759	0.0694478	0.99849	0.11014	0.898335	0.0499641	1.08212	0.0377735	0.939437	0.0862889	0.789308	0.0790644	26.3932	0.747361	0.0962759	5	17	1.89214e-07	0.000220434
26890	CU684580	0	1	0	0.0519566	0.0747754	0.152705	0.0349933	0.304323	0.0647448	0.538823	0.0165687	0.321141	0.0515346	-0.0237787	0.120813	34.2067	0.834504	0.0829461	5	17	2.70639e-08	3.92157e-05
18226	CU685305	0	1	0	-0.527663	0.0584895	-0.49957	0.0316859	-0.128818	0.071645	-0.0588965	0.156544	-0.149175	0.105438	-0.546341	0.187411	14.9746	1.01208	0.229794	5	17	1.03134e-05	0.00597148
3170	CU685937	0	1	0	0.0272753	0.037526	0.313287	0.171375	0.685283	0.092329	0.679786	0.0934269	0.478268	0.254918	0.1078	0.186664	14.1263	1.57297	0.378589	5	17	1.51914e-05	0.00806661
16863	CU685952	0	1	adductor muscle	-0.0604542	0.0492589	0.0642509	0.0309496	0.148149	0.0341076	0.219984	0.0361913	0.24681	0.120341	-0.170293	0.0834461	25.5755	0.50719	0.0674258	5	17	2.38558e-07	0.00026981
41921	CU685964	0	1	0	1.44921	0.0748706	1.15919	0.163633	1.08604	0.105537	1.05265	0.0721423	1.00374	0.081213	0.850882	0.0332683	16.4508	0.787136	0.162683	5	17	5.46589e-06	0.00360749
16932	CU686207	"(sp:P24733) Myosin heavy chain, striated muscle OS=Aequipecten irradians PE=1 SV=1"	1	adductor muscle	0.369059	0.0817883	0.507327	0.087965	0.249059	0.114329	0.320229	0.0947936	0.276005	0.049423	-0.0748087	0.146967	14.2659	0.751627	0.179136	5	17	1.42362e-05	0.00765909
43989	CU686296	0	1	0	-0.144981	0.0444698	-0.0438243	0.102263	-0.295047	0.0181994	-0.0726225	0.0865201	-0.229821	0.0255791	-0.603209	0.0889272	33.3159	0.84063	0.0857892	5	17	3.30749e-08	4.67018e-05
16189	CU686310	0	1	0	1.50831	0.0435673	1.51924	0.0280289	1.62295	0.136642	1.76741	0.0205306	1.71389	0.0400998	1.2508	0.0833114	25.0543	0.658538	0.089367	5	17	2.77453e-07	0.000309082
28582	CU984440	0	2	female gonad	1.88235	0.0935453	1.00501	0.0602351	1.65657	0.177111	1.22359	0.0774739	0.905124	0.0651614	0.936148	0.12167	54.2898	3.22787	0.202152	5	17	7.45522e-10	1.38593e-06
28606	CU984485	0	2	0	1.0798	0.0257241	0.567662	0.0789136	0.977914	0.102021	0.796423	0.0977537	0.754824	0.0557405	0.649649	0.0969166	22.2217	0.751302	0.114952	5	17	6.63143e-07	0.000655185
32716	CU986652	0	2	0	1.90338	0.0789756	0.715946	0.114528	1.70321	0.106842	1.0934	0.112837	0.952996	0.0940825	0.393379	0.0646308	140.913	6.66179	0.160738	5	17	3.22964e-13	7.67362e-10
7850	CU986933	(sp:O02670) G protein-activated inward rectifier potassium channel 4 OS=Sus scrofa GN=KCNJ5 PE=2 SV=1	2	0	0.0936972	0.188944	-0.744759	0.159568	-0.0147983	0.171762	-0.133995	0.0991768	-0.283164	0.0832849	-0.663824	0.104621	23.1948	2.37548	0.348209	5	17	4.86643e-07	0.000499295
4317	CU987231	0	2	0	1.36575	0.0702988	0.729193	0.0746315	1.1721	0.116103	1.00901	0.125659	0.785489	0.0532046	0.598274	0.0905984	38.0308	1.6737	0.149631	5	17	1.20273e-08	1.87506e-05
26322	CU987976	0	2	0	0.68412	0.107269	-0.0677733	0.0200238	0.170097	0.114808	-0.0447789	0.00998555	-0.216516	0.0510039	-0.343614	0.0621177	95.3061	2.58849	0.0923432	5	17	8.03102e-12	1.77646e-08
1921	CU988374	0	2	0	2.29724	0.0943353	1.67631	0.0235384	2.11421	0.0915396	1.86393	0.0355354	1.67546	0.060173	1.58531	0.0229038	80.006	1.55545	0.0661017	5	17	3.33201e-11	7.0572e-08
34825	CU988703	0	2	0	1.61516	0.150693	0.905352	0.0961579	1.37461	0.0279268	1.10834	0.223186	0.866222	0.0975049	0.721922	0.12472	24.4053	2.24902	0.313319	5	17	3.36159e-07	0.000365741
20746	CU989582	0	2	0	0.982722	0.230643	-0.471054	0.155872	0.723915	0.260093	0.338204	0.15344	-0.223419	0.244189	-0.208228	0.259224	27.2569	6.62906	0.826902	5	17	1.49119e-07	0.000180434
31047	CU989766	0	2	0	1.9076	0.0524422	1.387	0.0643206	1.65681	0.0730003	1.36189	0.0688721	1.27613	0.0511868	1.24223	0.0273609	75.5914	1.29762	0.0583653	5	17	5.27322e-11	1.10263e-07
41956	AM855116	(sp:Q14678) KN motif and ankyrin repeat domain-containing protein 1 OS=Homo sapiens GN=KANK1 PE=1 SV=3	2	0	0.902051	0.0238113	0.403504	0.0366172	0.70015	0.112461	0.632318	0.0490379	0.409232	0.0452366	0.267708	0.0582571	56.1153	1.07534	0.0651545	5	17	5.73548e-10	1.08056e-06
20926	CU991507	0	2	0	2.04041	0.0632711	0.998582	0.198939	1.90822	0.0863705	1.42715	0.0689898	1.06648	0.134531	0.676944	0.0826025	86.7744	5.71857	0.224065	5	17	1.72394e-11	3.72372e-08
5361	CU991562	hypothetical protein BRAFLDRAFT_66994 [Branchiostoma floridae]	2	0	1.31808	0.162304	0.631403	0.093897	1.06557	0.0403474	1.13611	0.0411629	0.848069	0.0454833	0.373107	0.0978252	55.916	2.43878	0.148291	5	17	5.8997e-10	1.10973e-06
34356	AM855190	(sp:Q6PWT7) Copper chaperone for superoxide dismutase OS=Sus scrofa GN=CCS PE=2 SV=1	2	0	1.10508	0.0671938	0.522627	0.047431	0.880989	0.116846	0.841126	0.0347404	0.652301	0.142814	0.569152	0.0396229	29.7584	0.966055	0.110375	5	17	7.75125e-08	9.99136e-05
16449	AM855197	(sp:Q28181) Cyclic nucleotide-gated cation channel beta-1 OS=Bos taurus GN=CNGB1 PE=1 SV=1	2	0	1.31981	0.0790936	0.228617	0.126858	1.18732	0.121206	0.836589	0.0671377	0.519905	0.0769009	0.0935679	0.0341081	121.894	5.01771	0.139959	5	17	1.06815e-12	2.48451e-09
22246	CU992097	0	2	0	1.05224	0.0988309	0.309419	0.088056	0.824469	0.104552	0.526159	0.0891867	0.404411	0.01544	0.219486	0.0590426	57.7529	2.04097	0.120155	5	17	4.5636e-10	8.70734e-07
31441	CU992574	0	2	0	1.6874	0.0954332	0.67245	0.159545	1.25115	0.249785	0.868325	0.144871	0.747226	0.0644596	0.45269	0.192327	28.6356	3.98463	0.473108	5	17	1.03329e-07	0.000129471
11253	CU993226	0	2	0	1.43639	0.107756	0.646172	0.0624243	1.18781	0.13558	1.00524	0.165392	0.696065	0.0500239	0.466574	0.160485	33.9341	2.65489	0.266004	5	17	2.8763e-08	4.12749e-05
4063	CU993516	0	2	0	1.35545	0.0943245	0.289289	0.0721565	1.06084	0.076895	0.804677	0.135189	0.512941	0.0600052	0.168091	0.0824353	100.081	4.19355	0.142465	5	17	5.38691e-12	1.20721e-08
14297	CU994132	0	2	0	1.6133	0.0844381	1.08217	0.0297055	1.30272	0.0692017	1.07537	0.0507445	0.978576	0.11675	1.10646	0.136232	27.0036	1.02508	0.129067	5	17	1.59795e-07	0.000191434
1327	CU994191	(sp:O88576) Sodium-dependent neutral amino acid transporter B(0)AT3 OS=Mus musculus GN=Slc6a18 PE=2 SV=1	2	0	1.34436	0.157232	-0.170951	0.102746	1.03058	0.216008	0.567832	0.0669237	0.0715143	0.0866501	-0.299868	0.0677326	104.137	8.82195	0.28803	5	17	3.89178e-12	8.7993e-09
38707	CU995084	0	2	female gonad	1.29528	0.0575837	-0.829806	0.258392	1.16839	0.115207	0.25964	0.165486	-0.492137	0.166981	-0.902571	0.185779	130.816	18.9116	0.491528	5	17	5.96745e-13	1.40414e-09
25266	CU995221	0	2	0	0.561299	0.0560666	-0.0295916	0.0805971	0.30098	0.074828	0.225601	0.0862273	0.0460248	0.0363402	-0.177108	0.0811286	51.8297	1.37818	0.090408	5	17	1.07575e-09	1.96324e-06
30559	CU995224	0	2	0	1.68775	0.11772	1.04028	0.0343916	1.52669	0.100194	1.37396	0.0396281	1.4637	0.0737007	1.18455	0.140931	24.8704	1.10014	0.150398	5	17	2.92835e-07	0.000323583
4818	CU995345	0	2	0	1.46124	0.0714988	0.682174	0.0786283	1.24709	0.0881001	0.836654	0.0847215	0.7481	0.0691821	0.565267	0.150917	53.0385	2.44292	0.156602	5	17	8.96613e-10	1.64977e-06
24307	CU995679	0	2	0	1.51422	0.0277072	1.11979	0.0553757	1.35255	0.0212824	1.2789	0.0159182	1.12532	0.0696436	0.948668	0.0298779	103.397	0.790683	0.026	5	17	4.12581e-12	9.31608e-09
10232	CU995837	(sp:Q14315) Filamin-C OS=Homo sapiens GN=FLNC PE=1 SV=3	2	0	1.35277	0.179748	0.00862068	0.103771	1.05071	0.131507	0.386908	0.0998274	0.298499	0.13193	-0.332419	0.18974	76.9581	8.00875	0.353826	5	17	4.56244e-11	9.572e-08
39194	CU996437	(sp:Q9WTY2) GTP-binding protein REM 2 OS=Rattus norvegicus GN=Rem2 PE=1 SV=1	2	0	0.39518	0.0855968	-0.73221	0.095624	0.188706	0.0712124	-0.220373	0.0565331	-0.22043	0.0856981	-0.490407	0.0937702	102.743	3.48361	0.115281	5	17	4.34586e-12	9.8086e-09
40605	AM855824	0	2	female gonad	-0.0020814	0.0953063	-0.730625	0.103793	-0.164937	0.0512316	-0.362265	0.0380644	-0.51521	0.0538192	-0.733633	0.0875394	60.1062	1.77794	0.100572	5	17	3.32029e-10	6.46461e-07
29638	CU997456	0	2	0	1.32396	0.0910503	0.471048	0.203414	1.23506	0.0919306	0.96864	0.0974915	0.752606	0.035549	0.393181	0.0541265	47.3405	2.98226	0.214186	5	17	2.19433e-09	3.89054e-06
24302	AM855890	0	2	0	0.885708	0.0877724	0.0702926	0.152934	0.604884	0.0734671	0.0671824	0.201038	0.101469	0.0562498	0.0424398	0.0717633	34.4068	2.55518	0.252497	5	17	2.58887e-08	3.76163e-05
41180	CU998140	0	2	0	1.37842	0.0645465	0.541539	0.0734731	1.3861	0.0788228	1.12257	0.123845	0.718508	0.0265589	0.30688	0.133422	93.4432	4.07195	0.148161	5	17	9.43423e-12	2.0727e-08
45007	CU998374	0	2	0	1.2876	0.14729	0.434343	0.13433	0.964217	0.120638	0.710287	0.0820302	0.448232	0.0895651	0.37177	0.137239	34.0489	2.55978	0.255611	5	17	2.80333e-08	4.0424e-05
5399	AM856027	(sp:Q6IE24) Inactive ubiquitin carboxyl-terminal hydrolase 54 OS=Rattus norvegicus GN=Usp54 PE=2 SV=2	2	0	0.296599	0.0582876	-0.368359	0.156088	0.191544	0.113294	-0.000505817	0.0852537	-0.236824	0.0416198	-0.46195	0.0900118	37.2	1.87493	0.171364	5	17	1.42523e-08	2.18488e-05
43084	CU999369	0	2	0	1.55166	0.0936002	0.948642	0.0450508	1.35626	0.0618342	1.1867	0.0232368	1.0255	0.0483161	0.952859	0.0409094	72.0548	1.16881	0.0551516	5	17	7.76141e-11	1.59963e-07
44563	CX739658	0	2	0	1.23423	0.0528565	0.3964	0.0617525	1.0646	0.0536291	0.896736	0.0146995	0.719599	0.0802831	0.461612	0.0551152	146.42	2.20068	0.0511018	5	17	2.35145e-13	5.61762e-10
860	DV736483	0	2	0	1.26709	0.0443001	0.594714	0.169836	0.985606	0.0897266	0.772445	0.0720276	0.575492	0.0342254	0.650947	0.0527495	33.681	1.41487	0.142827	5	17	3.0447e-08	4.34783e-05
7194	DV736530	0	2	0	1.25101	0.0438935	0.330502	0.116488	0.886103	0.24064	0.650222	0.170236	0.247309	0.154304	0.172356	0.102563	30.165	3.42754	0.386329	5	17	7.00115e-08	9.1435e-05
1430	DV736739	0	2	0	1.49627	0.119839	0.838674	0.136217	1.37924	0.05916	1.44395	0.113991	1.0547	0.0680373	0.636634	0.123954	41.8199	2.50406	0.203583	5	17	5.77333e-09	9.49135e-06
1367	DV736865	0	2	0	1.1899	0.0900378	0.335475	0.0447933	0.846387	0.176829	0.526764	0.161103	0.23235	0.149397	0.146799	0.114046	37.2088	3.12626	0.285666	5	17	1.42266e-08	2.18236e-05
3972	EE677865	0	2	0	2.43219	0.0601056	1.80211	0.052141	2.27621	0.0845797	2.0558	0.0489159	1.91762	0.0465632	1.70737	0.0396581	93.1474	1.55304	0.0566881	5	17	9.68137e-12	2.12409e-08
6467	ES789601	(sp:P31661) Sodium- and chloride-dependent creatine transporter 1 OS=Oryctolagus cuniculus GN=SLC6A8 PE=2 SV=1	2	visceral ganglion	0.810853	0.108758	0.193253	0.0926177	0.544791	0.0546169	0.394693	0.0903344	0.359992	0.0602475	0.239924	0.0777061	28.9243	1.02106	0.120023	5	17	9.58771e-08	0.000121093
8793	ES789831	(sp:Q6DHB5) Lipoma HMGIC fusion partner-like 3 protein OS=Danio rerio GN=lhfpl3 PE=2 SV=1	2	0	1.18657	0.0698871	-0.294514	0.081363	0.959801	0.046439	0.218779	0.0194221	-0.0588461	0.0828248	-0.315323	0.0926588	342.798	8.22621	0.0815907	5	17	2.22045e-16	5.50671e-13
38488	EW777944	0	2	0	1.7405	0.0990327	1.15485	0.0548819	1.55823	0.0544272	1.38573	0.0324281	1.23665	0.0362367	1.14012	0.0239727	70.7323	1.14109	0.0548505	5	17	9.01e-11	1.84074e-07
30774	EW778397	(sp:P35224) Catenin beta OS=Urechis caupo PE=2 SV=1	2	female gonad	1.25152	0.0860469	0.425019	0.0385022	1.07061	0.080197	0.685175	0.0444735	0.524857	0.0682046	0.353695	0.090505	104.045	2.62454	0.085765	5	17	3.91998e-12	8.85914e-09
7393	EW779003	(sp:O35177) Enhancer of filamentation 1 OS=Mus musculus GN=Nedd9 PE=1 SV=2	2	0	0.823311	0.052681	0.310455	0.0781833	0.598696	0.0776649	0.432632	0.0779061	0.405877	0.138094	0.203117	0.0950401	25.7135	0.969588	0.128205	5	17	2.29304e-07	0.000261177
15368	EW779053	(sp:Q80TB7) Zinc finger SWIM domain-containing protein 6 (Fragment) OS=Mus musculus GN=Zswim6 PE=2 SV=2	2	0	0.951654	0.0453623	0.61574	0.066492	0.620866	0.0258036	0.621524	0.0253432	0.504647	0.0416183	0.342404	0.0597375	71.3321	0.787401	0.037531	5	17	8.41788e-11	1.72651e-07
6507	EX956437	(sp:Q62901) Arginine-glutamic acid dipeptide repeats protein OS=Rattus norvegicus GN=Rere PE=2 SV=2	2	female gonad	1.17982	0.093258	0.463929	0.105014	0.917342	0.102496	0.547934	0.102827	0.28552	0.0129415	0.31967	0.0472585	63.5014	2.41766	0.129447	5	17	2.14079e-10	4.24733e-07
10268	FP000141	(sp:Q62901) Arginine-glutamic acid dipeptide repeats protein OS=Rattus norvegicus GN=Rere PE=2 SV=2	2	female gonad	1.77706	0.0441809	1.17173	0.0293694	1.51175	0.0945913	1.19336	0.0653326	0.946786	0.0224479	0.879527	0.0469095	137.048	2.24519	0.0557004	5	17	4.06342e-13	9.61811e-10
15788	FP002612	(sp:A2AJN7) Sodium bicarbonate transporter-like protein 11 OS=Mus musculus GN=Slc4a11 PE=2 SV=1	2	female gonad	0.750232	0.0456835	-0.210237	0.0817987	0.378194	0.116876	-0.0555334	0.0791786	-0.190644	0.20084	-0.443832	0.0733111	71.6863	3.8567	0.182919	5	17	8.0887e-11	1.66223e-07
26230	FP002666	0	2	0	1.62625	0.049768	1.23229	0.0214869	1.60277	0.0904323	1.59958	0.0374765	1.41786	0.0216214	1.10307	0.0658782	64.2007	0.97279	0.0515179	5	17	1.96113e-10	3.9046e-07
16112	AM856674	0	2	0	1.47575	0.0245016	1.00875	0.0210676	1.35996	0.0989138	1.39609	0.0201289	1.10774	0.0452939	0.809006	0.0612734	93.0897	1.3434	0.0490662	5	17	9.73033e-12	2.13386e-08
17553	AM856679	0	2	0	0.899886	0.0732527	-0.145168	0.116686	0.442012	0.179989	-0.0240809	0.137427	-0.195757	0.103564	-0.465515	0.0935132	64.0687	4.87067	0.258477	5	17	1.99372e-10	3.9675e-07
10443	FP004695	0	2	0	0.774838	0.051854	0.223875	0.0324796	0.489449	0.0951739	0.284067	0.06262	0.126893	0.10297	0.240876	0.10891	34.0553	1.07134	0.10696	5	17	2.79931e-08	4.04221e-05
3656	FP006365	0	2	0	1.22765	0.0583737	0.232466	0.193976	1.17693	0.131662	0.792942	0.0825457	0.423449	0.0830233	0.158415	0.0978953	61.7674	4.32526	0.238085	5	17	2.67108e-10	5.25401e-07
44233	FP006462	(sp:Q8TCT6) Signal peptide peptidase-like 3 OS=Homo sapiens GN=SPPL3 PE=2 SV=1	2	female gonad	0.754575	0.130966	0.131486	0.0948831	0.478906	0.0964943	0.185155	0.0762558	0.0255331	0.052179	0.11367	0.0465887	37.169	1.48457	0.1358	5	17	1.43439e-08	2.19749e-05
4504	FP006477	0	2	0	2.19021	0.0326705	1.65443	0.0148238	2.02815	0.171259	1.93295	0.0697823	1.77398	0.0753095	1.49659	0.103435	29.1997	1.28735	0.149899	5	17	8.93244e-08	0.000113799
37007	AM857000	(sp:Q1LYM3) Protein spire homolog 1 OS=Danio rerio GN=spire1 PE=2 SV=1	2	0	0.278281	0.0773033	-0.276686	0.0842241	0.0925338	0.0650393	-0.064504	0.035171	-0.253137	0.0864459	-0.429128	0.122084	39.9405	1.35409	0.115269	5	17	8.24306e-09	1.32796e-05
42437	FP006966	0	2	female gonad	1.84046	0.0114295	1.16998	0.0252079	1.49637	0.0698815	1.24546	0.0478386	1.10172	0.0819815	1.10063	0.051499	124.087	1.65008	0.0452124	5	17	9.22373e-13	2.1519e-09
4231	FP007253	0	2	0	1.31383	0.0536396	0.519576	0.120545	1.01852	0.111678	0.766466	0.0160396	0.495733	0.0896129	0.194459	0.0359947	98.2966	3.19061	0.11036	5	17	6.24023e-12	1.39282e-08
29570	FP007730	0	2	0	1.40399	0.0207594	0.927087	0.0907736	1.25402	0.0961231	1.06998	0.0554828	0.911899	0.0139967	0.966301	0.0690092	33.5027	0.765094	0.077645	5	17	3.16997e-08	4.50453e-05
4854	FP008026	(sp:Q8TBZ3) WD repeat-containing protein 20 OS=Homo sapiens GN=WDR20 PE=1 SV=2	2	female gonad	0.745937	0.0820948	0.223635	0.0213331	0.504714	0.105253	0.285399	0.0118344	0.0928905	0.0210285	0.14063	0.0975478	47.2143	1.17578	0.08467	5	17	2.24073e-09	3.9661e-06
40500	FP008324	(sp:Q92038) Acyl-CoA desaturase OS=Cyprinus carpio PE=2 SV=2	2	0	0.78682	0.133869	-0.114805	0.08284	0.202485	0.178817	0.180167	0.0537797	0.545313	0.252347	0.265676	0.164135	16.8356	1.91694	0.387132	5	17	4.66694e-06	0.00320152
12686	FP011634	(sp:Q8BTM8) Filamin-A OS=Mus musculus GN=Flna PE=1 SV=4	2	0	0.740924	0.10378	-0.305822	0.0943468	0.34669	0.160463	-0.234935	0.157898	-0.381996	0.114841	-0.780181	0.189014	58.7635	5.95605	0.344611	5	17	3.97516e-10	7.62435e-07
39766	AJ535669	(sp:Q25410) Putative molluscan insulin-related peptide(s) receptor OS=Lymnaea stagnalis PE=2 SV=1	2	0	0.846538	0.0493106	0.261558	0.0375571	0.513069	0.0615124	0.248991	0.0559148	0.00531161	0.0384688	0.0175636	0.0395541	166.379	1.953	0.0399102	5	17	8.14904e-14	1.97614e-10
30791	EF687775	(sp:Q9PWF7) Catalase OS=Rana rugosa GN=cat PE=2 SV=3	2	0	2.12546	0.128864	1.37574	0.166776	2.04047	0.0899832	1.85224	0.0694993	1.56408	0.104999	1.21304	0.172247	32.4863	2.70494	0.283098	5	17	4.00411e-08	5.54169e-05
40552	AM858272	fras1 related extracellular matrix protein [Schistosoma mansoni]	2	0	1.9114	0.163281	0.993413	0.134048	1.80472	0.0988717	1.50775	0.110779	1.13061	0.100925	0.699111	0.125437	57.6174	4.53495	0.267607	5	17	4.64962e-10	8.86682e-07
15257	AM854218	0	2	0	1.85852	0.16814	0.922302	0.16648	1.74987	0.100874	1.43754	0.11061	1.06228	0.127024	0.548091	0.0957638	58.974	5.11639	0.294973	5	17	3.86355e-10	7.44892e-07
43725	AM854612	0	2	0	1.40377	0.0436761	0.574426	0.0966425	1.03035	0.126906	0.871962	0.0877824	0.665879	0.17319	0.505591	0.184177	28.5143	2.23861	0.266927	5	17	1.06652e-07	0.000133101
18496	AM853616	0	2	0	1.86968	0.0969814	1.36807	0.0278294	1.77824	0.0792038	1.50143	0.0250501	1.42761	0.0328007	1.43339	0.0230549	52.5593	0.850042	0.0549882	5	17	9.633e-10	1.76765e-06
32970	EW777683	(sp:Q00944) Focal adhesion kinase 1 OS=Gallus gallus GN=PTK2 PE=1 SV=2	2	0	1.9074	0.0934596	1.38692	0.0573293	1.8105	0.0998536	1.50749	0.030412	1.39205	0.0657054	1.37016	0.0495791	43.7703	1.09116	0.0847596	5	17	4.05023e-09	6.86513e-06
7603	AM859477	0	2	0	1.33076	0.0714449	0.231936	0.160861	1.18432	0.062739	0.911545	0.0355749	0.576747	0.0384016	0.228311	0.0982205	107.982	4.46025	0.140439	5	17	2.89146e-12	6.58097e-09
43022	AJ565554	0	2	female gonad	1.43691	0.0841278	0.616819	0.0679405	1.20128	0.136233	0.959623	0.1141	0.834949	0.0233219	0.651659	0.144361	35.8666	2.04041	0.193423	5	17	1.88525e-08	2.80903e-05
3235	AM857969	0	2	0	1.61364	0.0490375	0.153179	0.209343	1.23952	0.122942	0.632159	0.126964	0.104373	0.0860876	-0.208942	0.0961563	122.43	9.9007	0.274951	5	17	1.03029e-12	2.39954e-09
40549	AM860658	0	2	0	1.18812	0.066689	0.634172	0.0107133	1.1026	0.0992147	0.928924	0.0703513	0.774737	0.054615	0.655709	0.0554695	49.3361	1.06307	0.0732614	5	17	1.58659e-09	2.8511e-06
34868	CB617417	0	2	0	1.78321	0.0608402	1.45001	0.0408721	1.71892	0.0362371	1.57735	0.0254178	1.52436	0.0123575	1.44351	0.0410519	48.8612	0.393117	0.027355	5	17	1.71198e-09	3.06787e-06
29541	AM857414	0	2	0	1.025	0.132441	-0.0374246	0.114728	0.661593	0.175017	0.374145	0.123015	0.00226695	0.143133	-0.262088	0.150097	46.5952	4.63159	0.337962	5	17	2.48487e-09	4.37833e-06
43930	AM863659	0	2	0	2.15746	0.0864082	1.41781	0.0571273	2.04403	0.041629	1.77823	0.0339069	1.59465	0.0315366	1.57024	0.057574	106.244	1.64901	0.0527711	5	17	3.30269e-12	7.50702e-09
14907	AM859013	0	2	female gonad	1.93436	0.0791361	1.25568	0.0567438	1.7125	0.148587	1.41159	0.0799586	1.16464	0.0146228	0.955851	0.129223	53.0697	2.56584	0.164385	5	17	8.92456e-10	1.64301e-06
42254	AM855431	0	2	0	1.33737	0.0761873	-0.0433702	0.241087	1.13504	0.0936131	0.51734	0.110094	-0.0121623	0.0207856	-0.289509	0.153679	92.1998	8.8444	0.32615	5	17	1.05229e-11	2.30452e-08
10055	AM858004	0	2	0	1.53578	0.0150367	0.923356	0.0452068	1.28446	0.11527	1.13226	0.0127813	0.989728	0.0631575	0.784307	0.0627321	73.9292	1.45564	0.0669446	5	17	6.30992e-11	1.30994e-07
14971	AM864060	0	2	0	0.918164	0.099447	-0.130507	0.189762	0.811381	0.163669	0.490738	0.22831	0.0667143	0.0240317	-0.395262	0.0431311	49.5762	5.55797	0.381173	5	17	1.52715e-09	2.74734e-06
42421	AM862948	(sp:Q6P1R4) tRNA-dihydrouridine synthase 1-like OS=Homo sapiens GN=DUS1L PE=1 SV=1	2	0	0.604077	0.0413263	-0.154167	0.0539488	0.375607	0.09266	0.0369906	0.0334752	-0.0583586	0.071076	-0.0527211	0.0926518	74.9447	1.73764	0.0788311	5	17	5.65207e-11	1.17902e-07
21239	DW713987	0	2	0	1.91541	0.0587483	1.36752	0.100608	1.70918	0.0968106	1.60545	0.084204	1.48949	0.0177764	1.20555	0.0496306	43.8807	1.26647	0.0981295	5	17	3.97152e-09	6.75159e-06
28620	AM854246	(sp:P33450) Cadherin-related tumor suppressor OS=Drosophila melanogaster GN=ft PE=1 SV=3	2	0	0.851917	0.0974897	-0.166965	0.0606887	0.500934	0.0395849	0.18336	0.0571638	-0.0293261	0.0361086	-0.479234	0.120059	154.826	4.54988	0.0999161	5	17	1.48104e-13	3.55597e-10
39594	CU990929	0	2	0	1.44929	0.109872	0.695653	0.150108	1.31566	0.127114	1.04106	0.129486	0.827142	0.0397881	0.722661	0.0648825	30.7387	1.97434	0.218382	5	17	6.07722e-08	8.07055e-05
2814	CU684507	0	2	0	1.71015	0.111113	0.928933	0.162835	1.58515	0.0983605	1.37109	0.151538	1.08518	0.0493434	0.735568	0.0656486	42.5333	2.90601	0.232299	5	17	5.06255e-09	8.42915e-06
32326	CU991449	0	2	female gonad	1.59983	0.0541061	1.02054	0.0222249	1.45144	0.134732	1.10863	0.0360444	0.961675	0.0857399	0.959652	0.0439795	55.5063	1.455	0.0891249	5	17	6.2542e-10	1.17141e-06
1375	AM864773	0	2	0	0.633075	0.142617	-1.14887	0.131152	0.263731	0.229195	-0.418339	0.175056	-1.21363	0.206452	-0.828686	0.261883	57.2018	10.9884	0.653139	5	17	4.92509e-10	9.34782e-07
17424	AM863929	(sp:Q9CUS9) Signal peptide peptidase-like 3 OS=Mus musculus GN=Sppl3 PE=2 SV=2	2	0	0.570294	0.0903488	0.161792	0.0756628	0.386212	0.0851768	0.234305	0.0537425	0.237702	0.0679347	0.180893	0.0441041	18.8766	0.483901	0.0871591	5	17	2.11236e-06	0.0017089
36949	AM855576	(sp:Q9XZV3) Guanine nucleotide-binding protein G(o) subunit alpha OS=Geodia cydonium PE=2 SV=3	2	0	0.397498	0.0988252	-0.280883	0.0786501	0.220964	0.0859101	0.0150167	0.0238266	-0.250182	0.0845028	-0.354923	0.148764	40.3951	1.81035	0.152375	5	17	7.55227e-09	1.22347e-05
34694	FP001896	0	2	0	1.52904	0.158275	0.897803	0.0640286	1.48618	0.0682774	1.46674	0.105279	1.19233	0.0494272	0.951457	0.131015	28.1889	1.58413	0.191069	5	17	1.1617e-07	0.000144167
28491	AM858949	(sp:Q9NZR2) Low-density lipoprotein receptor-related protein 1B OS=Homo sapiens GN=LRP1B PE=1 SV=2	2	0	0.544862	0.0512237	-0.158663	0.108761	0.620103	0.145699	0.511602	0.109623	0.445043	0.0748914	0.112426	0.0986968	33.9816	1.83436	0.183535	5	17	2.84586e-08	4.09234e-05
9869	AM857931	0	2	0	1.61697	0.0432406	0.925794	0.135501	1.48695	0.140624	1.09345	0.0915114	0.977529	0.121236	0.96194	0.0451835	32.7747	1.7415	0.18066	5	17	3.74481e-08	5.22776e-05
38612	AM867467	0	2	0	0.731772	0.0530742	-0.0174435	0.104111	0.428496	0.088231	0.219821	0.0265313	0.00178104	0.0706409	-0.174045	0.0742273	80.7379	2.20707	0.092943	5	17	3.09505e-11	6.5615e-08
29745	AM863688	0	2	0	1.59489	0.0464894	1.27403	0.0405076	1.41989	0.0482259	1.46641	0.0208108	1.29616	0.000282715	1.15205	0.02386	78.3029	0.492639	0.0213909	5	17	3.96599e-11	8.34842e-08
12907	AM858052	(sp:Q5R9S6) Tetraspanin-8 OS=Pongo abelii GN=TSPAN8 PE=2 SV=1	2	0	0.773419	0.206768	-0.310663	0.145897	0.646246	0.134545	0.132974	0.131011	-0.173663	0.0955372	-0.358024	0.131901	43.6398	4.72804	0.368364	5	17	4.14554e-09	6.99767e-06
33278	AM858171	0	2	0	2.26407	0.0571886	1.36121	0.0645186	2.06857	0.0645391	1.64231	0.0812076	1.5218	0.0101747	1.38486	0.046111	154.294	2.7757	0.0611652	5	17	1.52434e-13	3.65688e-10
36956	AM856075	PREDICTED: similar to ENSANGP00000007666 [Nasonia vitripennis]	2	0	1.91435	0.0512637	0.718382	0.117809	1.71278	0.103154	1.07208	0.105006	0.937301	0.094566	0.40541	0.126503	126.668	6.72145	0.180416	5	17	7.78488e-13	1.82166e-09
21000	AM866616	0	2	0	1.80828	0.0787536	0.743096	0.108854	1.73331	0.120194	1.29768	0.111544	0.912914	0.0674243	0.507266	0.0664734	122.155	5.64671	0.157168	5	17	1.0496e-12	2.44348e-09
32368	AM858033	0	2	0	1.22399	0.0570094	0.884285	0.0459045	1.10791	0.0574725	1.02303	0.0771902	0.942575	0.0309864	0.896614	0.0490821	22.4256	0.349599	0.0530036	5	17	6.20932e-07	0.000617827
24223	BQ427204	0	2	0	1.28498	0.144378	0.508291	0.0913755	0.950848	0.0511472	0.723759	0.0911749	0.593201	0.0317922	0.490674	0.0998937	41.954	1.87964	0.152328	5	17	5.63163e-09	9.29219e-06
19916	AM859639	0	2	0	0.94784	0.142047	0.0925912	0.207018	0.941458	0.118117	0.449185	0.0808932	0.221678	0.177634	0.177854	0.0955161	28.8757	2.89661	0.341065	5	17	9.70904e-08	0.000122237
30221	AM858058	0	2	0	1.48741	0.0409761	0.446838	0.123022	1.28223	0.109554	0.935262	0.075901	0.712197	0.0621015	0.129585	0.156146	95.4318	5.18103	0.184587	5	17	7.94509e-12	1.75904e-08
34075	AJ565602	(sp:Q9Y5Z4) Heme-binding protein 2 OS=Homo sapiens GN=HEBP2 PE=1 SV=1	2	0	1.39602	0.140403	0.37346	0.116468	1.20414	0.0647749	0.718759	0.177257	0.560489	0.19213	0.410669	0.143215	35.8126	3.60275	0.34204	5	17	1.9071e-08	2.83967e-05
35747	AM865978	0	2	female gonad	2.01445	0.0616075	1.35978	0.0509761	1.84103	0.0962225	1.42236	0.0260034	1.20348	0.0389703	1.20118	0.0301595	138.981	2.23813	0.0547531	5	17	3.61933e-13	8.5778e-10
2864	ES789819	0	2	0	1.92379	0.0431769	0.769808	0.0949508	1.6267	0.20994	1.07242	0.087449	0.975914	0.0863818	0.678958	0.0943077	72.0175	4.85931	0.229412	5	17	7.79389e-11	1.60554e-07
40444	ES789678	(sp:Q94887) Neurexin-4 OS=Drosophila melanogaster GN=Nrx-IV PE=1 SV=2	2	0	1.46018	0.076998	0.630671	0.092629	1.3127	0.147807	1.08669	0.147793	0.729863	0.0308977	0.257662	0.141619	58.8025	4.09321	0.236673	5	17	3.95421e-10	7.59209e-07
24694	EW777531	0	2	0	1.98998	0.0389587	1.62014	0.0250022	1.91199	0.088264	1.75897	0.0413565	1.70836	0.0760237	1.66246	0.0705589	23.2818	0.420622	0.0614262	5	17	4.73616e-07	0.000488298
12238	AM856273	0	2	0	1.6838	0.0844504	0.91519	0.123939	1.45811	0.0969033	1.19452	0.0220917	0.878942	0.0735652	0.611273	0.0886402	80.7574	3.1236	0.131508	5	17	3.089e-11	6.55485e-08
28764	FP008862	(sp:Q8VEB1) G protein-coupled receptor kinase 5 OS=Mus musculus GN=Grk5 PE=1 SV=2	2	0	2.09402	0.0325104	1.58309	0.0581426	1.98634	0.0450244	1.76737	0.0511325	1.6849	0.0780408	1.43976	0.0649979	78.5573	1.2036	0.0520926	5	17	3.86325e-11	8.13988e-08
38730	AM858598	0	2	0	0.93651	0.050975	0.148773	0.0538814	0.561302	0.12077	0.282962	0.115683	0.176902	0.119214	0.0862992	0.105358	43.8216	2.08969	0.162133	5	17	4.01345e-09	6.80681e-06
21593	AM853848	0	2	0	1.88894	0.0345873	1.49009	0.0441238	1.70534	0.100848	1.52973	0.0417813	1.41799	0.026588	1.41266	0.070629	37.4374	0.677798	0.0615565	5	17	1.3573e-08	2.09567e-05
40026	AM858716	0	2	0	1.7961	0.131212	1.27172	0.0566205	1.63023	0.0914967	1.34042	0.0483907	1.29145	0.0144491	1.35845	0.0194975	31.9582	0.892621	0.0949652	5	17	4.53243e-08	6.1777e-05
34329	AM864743	0	2	0	2.16069	0.0628916	1.24304	0.090512	1.96128	0.0989806	1.55288	0.0679519	1.14714	0.0542844	0.875307	0.101849	140.032	4.8064	0.1167	5	17	3.40172e-13	8.07229e-10
702	CU685531	(sp:Q60755) Calcitonin receptor OS=Mus musculus GN=Calcr PE=2 SV=1	2	0	0.14252	0.101912	-0.406456	0.018478	-0.105153	0.104744	-0.0970898	0.102331	-0.304422	0.0369605	-0.458301	0.1095	25.5906	1.01771	0.135214	5	17	2.37525e-07	0.000268878
24899	AM858526	0	2	0	0.55671	0.101356	-0.0669285	0.0825609	0.20654	0.0506553	0.0722454	0.101343	-0.108371	0.123663	-0.216874	0.0386096	41.3599	1.51856	0.124834	5	17	6.29045e-09	1.02786e-05
39160	FP006823	"(sp:Q9MYM7) Beta-1,3-galactosyltransferase 1 OS=Pongo pygmaeus GN=B3GALT1 PE=3 SV=1"	2	0	1.82601	0.183844	0.723793	0.107066	1.68127	0.16041	1.20411	0.122072	0.809017	0.0305731	0.704715	0.159395	48.8542	4.82469	0.335773	5	17	1.71389e-09	3.06958e-06
43403	DV736846	0	2	0	1.91884	0.0217131	0.803688	0.13149	1.7036	0.0837303	1.25492	0.025499	0.965295	0.0226103	0.641138	0.0897306	171.649	5.12138	0.101443	5	17	6.29496e-14	1.53156e-10
43761	AM858539	(sp:Q9XZV3) Guanine nucleotide-binding protein G(o) subunit alpha OS=Geodia cydonium PE=2 SV=3	2	0	1.08638	0.0418281	0.421231	0.0284875	1.03545	0.113133	0.801686	0.0367261	0.584943	0.128915	0.344647	0.161079	40.8513	1.93689	0.161205	5	17	6.92355e-09	1.12508e-05
24662	CU986561	0	2	0	1.49077	0.0338491	1.11354	0.0540723	1.28318	0.0748057	1.18212	0.0296434	1.03781	0.0254435	1.0921	0.0719994	36.5678	0.521404	0.0484791	5	17	1.62549e-08	2.46912e-05
18055	AM863040	0	2	0	0.358856	0.0648029	-0.301079	0.0507666	0.0219938	0.136899	-0.144888	0.0440596	-0.399501	0.0478208	-0.410913	0.107109	47.6032	1.69928	0.121369	5	17	2.10113e-09	3.7358e-06
42140	CU683253	0	2	0	1.29179	0.0429648	0.645035	0.0357427	1.2618	0.219908	0.93923	0.0786072	0.823041	0.119021	0.853284	0.055628	20.9809	1.29959	0.210602	5	17	1.00088e-06	0.000913806
41859	AM860217	0	2	female gonad	1.31499	0.10423	0.637415	0.0171869	1.1862	0.094871	0.82602	0.0307733	0.605098	0.0403638	0.686226	0.0790049	69.9279	1.75445	0.085304	5	17	9.87862e-11	2.00931e-07
14690	CU997135	0	2	0	1.68502	0.10888	1.17478	0.0612287	1.69062	0.0244127	1.67692	0.110373	1.53837	0.103092	1.34726	0.11899	21.0301	0.920855	0.148878	5	17	9.843e-07	0.000901619
18739	DV736298	(sp:Q9PU85) Serine/threonine-protein kinase Pim-3 OS=Coturnix coturnix japonica GN=PIM3 PE=2 SV=1	2	0	2.36264	0.146436	1.81116	0.0386268	2.31262	0.0864893	2.12248	0.0752913	1.9229	0.0526334	1.76583	0.031045	37.4982	1.28692	0.116686	5	17	1.34048e-08	2.07238e-05
25471	AM857418	0	2	female gonad	1.0885	0.109306	0.168751	0.0603312	0.935659	0.0406742	0.677978	0.110312	0.588341	0.0947883	0.0715975	0.0587338	95.9057	3.28761	0.116551	5	17	7.63023e-12	1.69238e-08
38929	ES789635	(sp:P16257) Translocator protein OS=Rattus norvegicus GN=Tspo PE=1 SV=1	2	0	2.22127	0.0596463	1.66042	0.0478559	2.10503	0.0540756	2.04468	0.0948239	1.91027	0.149574	1.77119	0.0680583	27.1573	0.894044	0.111931	5	17	1.53221e-07	0.000184631
42491	EE677428	0	2	0	2.00227	0.0446676	1.26633	0.056311	1.81003	0.0561897	1.56	0.0485366	1.40119	0.0826347	1.14294	0.05218	134.812	2.1357	0.0538628	5	17	4.65517e-13	1.09955e-09
37679	AM857575	0	2	0	1.86163	0.0720965	1.28071	0.0433846	1.71013	0.0596073	1.41342	0.0216258	1.33828	0.0299081	1.2073	0.0611749	97.4786	1.32796	0.0463186	5	17	6.6811e-12	1.48788e-08
9229	AM859164	0	2	0	1.72454	0.0791602	1.31086	0.0236672	1.50449	0.0783223	1.27661	0.0676671	1.09606	0.10887	1.08096	0.071709	43.2075	1.16598	0.0917508	5	17	4.47972e-09	7.5304e-06
35719	AM858883	(sp:Q8LAD0) Pyridoxal biosynthesis protein PDX2 OS=Arabidopsis thaliana GN=PDX2 PE=1 SV=1	2	0	1.42777	0.175315	0.417521	0.111359	1.16776	0.164644	0.882028	0.119617	0.435675	0.078243	0.30741	0.141464	42.7144	4.09476	0.325937	5	17	4.89806e-09	8.17976e-06
37647	CU998657	0	2	0	1.16462	0.0879643	-0.139672	0.0840753	0.947561	0.147113	0.386121	0.236103	0.22155	0.109445	-0.224294	0.0959372	65.8776	6.35812	0.328148	5	17	1.59513e-10	3.20461e-07
43803	AM858866	0	2	0	1.27871	0.00866277	0.112337	0.112958	0.976512	0.079301	0.635479	0.0868458	0.451649	0.0773973	0.0121198	0.139035	109.003	4.80795	0.149969	5	17	2.67675e-12	6.11637e-09
24932	AM853888	0	2	female gonad	2.01601	0.0309551	1.16039	0.068986	1.77794	0.0758491	1.40945	0.0600212	1.25069	0.040667	1.05	0.0935373	127.896	2.81274	0.074774	5	17	7.18869e-13	1.68575e-09
22089	CX068871	(sp:Q9V8R9) Protein 4.1 homolog OS=Drosophila melanogaster GN=cora PE=1 SV=1	2	0	2.46288	0.0534744	1.99016	0.0485042	2.37092	0.0531241	2.16405	0.0568031	2.08452	0.0311306	2.02783	0.0496002	57.5595	0.729677	0.0431016	5	17	4.68696e-10	8.93335e-07
44773	AM860870	0	2	0	1.159	0.0774436	0.575915	0.121974	0.977944	0.0973735	0.866857	0.0486099	0.664513	0.0259791	0.313911	0.0631572	55.8459	1.83102	0.111476	5	17	5.95878e-10	1.11787e-06
3035	CU988540	0	2	0	1.54922	0.0945459	0.862712	0.0649054	1.31613	0.0762458	1.13019	0.0443656	0.998358	0.115941	0.846735	0.0360778	54.4549	1.49895	0.0935896	5	17	7.27796e-10	1.35516e-06
193	EE677469	0	2	0	1.66753	0.0313833	0.540854	0.101662	1.41055	0.0707612	1.12179	0.091197	0.780592	0.125238	0.36623	0.198699	77.6194	5.10795	0.223746	5	17	4.25743e-11	8.9406e-08
14640	CU987207	0	2	0	1.20471	0.0573697	0.622505	0.0547049	0.890289	0.0613391	0.748015	0.0526466	0.5438	0.0211197	0.433479	0.0537543	106.151	1.49907	0.0480148	5	17	3.32645e-12	7.55769e-09
5621	AM861714	0	2	female gonad	2.07317	0.0603754	1.05527	0.026225	1.95235	0.0852879	1.57183	0.0569583	1.50722	0.121291	1.16601	0.0576539	134.369	3.31766	0.0839484	5	17	4.78395e-13	1.12901e-09
1493	AM859084	0	2	0	0.846916	0.0827789	0.11573	0.0776093	0.495022	0.0744073	0.25725	0.0390284	0.178082	0.0126378	0.0685284	0.0854511	71.4973	1.72499	0.0820307	5	17	8.26251e-11	1.69547e-07
13432	AM859142	(sp:Q9CUS9) Signal peptide peptidase-like 3 OS=Mus musculus GN=Sppl3 PE=2 SV=2	2	female gonad	1.3358	0.108693	0.662594	0.0548522	1.04857	0.141659	0.690752	0.103214	0.556045	0.0557438	0.552524	0.094083	38.8217	1.93422	0.169399	5	17	1.02643e-08	1.62176e-05
10798	AM859368	0	2	0	0.908211	0.0347684	0.117718	0.0469938	0.482811	0.0917471	0.221609	0.0535482	0.14291	0.0730562	0.185417	0.134864	57.0775	1.83564	0.109346	5	17	5.01095e-10	9.50075e-07
21974	CU990154	0	2	0	1.5881	0.141271	0.308872	0.0603462	1.33911	0.237644	0.830229	0.159076	0.312798	0.145884	0.481201	0.283793	32.3453	5.71102	0.600318	5	17	4.13803e-08	5.7022e-05
29371	CU989254	0	2	female gonad	1.63096	0.0670926	0.855996	0.0806688	1.46173	0.129326	1.13831	0.0546714	0.853596	0.0989574	0.794865	0.101344	57.7764	2.42264	0.142566	5	17	4.54881e-10	8.68823e-07
14620	AM859201	0	2	0	1.64611	0.0372641	0.868678	0.0208723	1.43967	0.11055	1.06618	0.0471523	0.917969	0.0232059	0.799658	0.0327764	147.878	2.30981	0.0531068	5	17	2.16605e-13	5.17685e-10
36483	CU683094	0	2	0	1.47542	0.0616951	0.901398	0.035499	1.34544	0.0425015	1.13133	0.0493781	1.06925	0.0509312	0.877173	0.0681129	82.2452	1.13787	0.0470392	5	17	2.6641e-11	5.68253e-08
25850	AM859457	0	2	female gonad	1.9234	0.0341633	1.01387	0.0269023	1.66903	0.113754	1.15555	0.0548366	0.903868	0.0463339	0.877564	0.0785209	163.862	3.67745	0.076304	5	17	9.24816e-14	2.23805e-10
38572	AM862166	0	2	0	1.91355	0.0751244	0.35252	0.145106	1.81661	0.137186	1.01763	0.0817848	0.520167	0.1605	0.0304296	0.225737	113.94	12.0983	0.361017	5	17	1.86073e-12	4.27783e-09
43029	AM859808	0	2	female gonad	1.43366	0.0958738	0.778905	0.038063	1.32566	0.131605	1.00756	0.0714154	0.852721	0.0189727	0.933744	0.0587222	41.9451	1.36009	0.110247	5	17	5.64091e-09	9.30186e-06
38332	AM860109	"(sp:Q5F2L1) Alpha-(1,3)-fucosyltransferase 10 OS=Rattus norvegicus GN=Fut10 PE=2 SV=1"	2	0	0.635498	0.113805	-0.164142	0.0367649	0.444805	0.171702	0.0849208	0.066234	0.0928475	0.113595	0.00948418	0.163348	23.8729	1.75796	0.250371	5	17	3.94778e-07	0.000418465
40570	AM860155	0	2	0	1.37943	0.105872	0.672556	0.0306367	1.09396	0.0625494	0.802291	0.0321023	0.682235	0.024514	0.658992	0.0887988	75.3614	1.68741	0.0761288	5	17	5.40458e-11	1.12848e-07
24528	AM860181	0	2	0	1.13275	0.0823433	-0.0823255	0.119106	1.02148	0.117553	0.548297	0.100423	0.192498	0.0641973	-0.326651	0.106766	133.257	6.93918	0.17705	5	17	5.12368e-13	1.20816e-09
8664	AM860216	0	2	0	1.41843	0.0689853	0.869257	0.0390927	1.16242	0.0554815	1.05902	0.0191068	0.863112	0.0124316	0.669507	0.0824079	93.8917	1.37727	0.0498738	5	17	9.07296e-12	1.99514e-08
904	AM860341	0	2	0	0.437008	0.148889	-1.20781	0.259062	0.350619	0.350347	-0.187535	0.19947	-0.719086	0.124728	-0.78621	0.211924	31.9424	8.65533	0.921288	5	17	4.54937e-08	6.19625e-05
8696	AM860787	0	2	female gonad	0.721865	0.111601	0.0329422	0.0745456	0.580761	0.129543	0.0321427	0.0853241	-0.133748	0.143204	-0.252322	0.092353	53.4892	3.0335	0.192822	5	17	8.38558e-10	1.55133e-06
16968	AM860923	0	2	0	0.829264	0.162623	-0.259617	0.122232	0.623826	0.0471534	0.305543	0.0836488	-0.0135574	0.0757737	-0.408125	0.146809	71.6604	4.8047	0.227964	5	17	8.11233e-11	1.66627e-07
10944	AM860993	(sp:Q7LFX5) Carbohydrate sulfotransferase 15 OS=Homo sapiens GN=CHST15 PE=1 SV=1	2	0	1.34134	0.116418	0.320326	0.178011	0.959486	0.112142	0.776217	0.0665484	0.463421	0.0668426	0.0546642	0.162794	53.2877	4.31284	0.275179	5	17	8.63976e-10	1.59231e-06
34411	AM861120	0	2	0	-0.0997252	0.17093	-1.54729	0.395317	-0.577301	0.271822	-0.924237	0.132981	-0.991892	0.088256	-1.20962	0.245426	16.7496	5.0617	1.02747	5	17	4.83337e-06	0.00327703
25828	AM861177	0	2	0	1.32847	0.0949225	0.775307	0.0437692	1.12219	0.0656721	0.855712	0.0197679	0.715864	0.0811152	0.623006	0.0289121	76.494	1.4074	0.062556	5	17	4.791e-11	1.00419e-07
28977	AM861178	(sp:Q6DC77) Membrane progestin receptor gamma-B OS=Danio rerio GN=paqr5b PE=2 SV=1	2	0	0.278578	0.05672	-0.728788	0.0499609	-0.143593	0.108213	-0.409939	0.0514878	-0.61709	0.0654822	-0.701974	0.092851	108.892	3.03177	0.0946627	5	17	2.69917e-12	6.16491e-09
27703	AM861388	0	2	0	1.07887	0.0378107	0.224105	0.0359821	0.846783	0.0873488	0.453675	0.10824	0.604181	0.131322	0.487654	0.0636986	55.9085	1.85606	0.112874	5	17	5.90601e-10	1.11033e-06
5675	AM861576	0	2	0	0.953239	0.0657413	-0.101642	0.0605539	0.583508	0.0180244	0.289294	0.0822371	0.0644038	0.0528195	-0.257259	0.0572341	227.216	4.05223	0.0606366	5	17	6.10623e-15	1.50152e-11
7931	AM861660	PREDICTED: similar to GH24606 [Ciona intestinalis]	2	0	0.835758	0.22476	-0.29958	0.048993	0.720158	0.114817	0.263132	0.139703	0.318815	0.266004	-0.191699	0.09067	34.1457	4.24844	0.423031	5	17	2.74341e-08	3.97246e-05
7316	AM861751	0	2	0	1.2926	0.0782938	0.827075	0.0591996	1.1831	0.0825828	1.02687	0.0746108	0.957523	0.060834	0.82796	0.0933367	24.3009	0.711877	0.0996004	5	17	3.4684e-07	0.000375975
21053	AM861766	0	2	0	0.897602	0.0322839	0.0785161	0.122748	0.671626	0.0895193	0.398952	0.0415226	0.176279	0.0769031	-0.157305	0.0845017	93.2175	3.03756	0.110791	5	17	9.62208e-12	2.11205e-08
41583	AM861820	(sp:P43249) G protein-coupled receptor kinase 5 OS=Bos taurus GN=GRK5 PE=2 SV=1	2	0	0.918036	0.0183321	0.417072	0.0770725	0.71545	0.0299102	0.561643	0.0372328	0.419278	0.0816908	0.170525	0.0896578	72.5315	1.34682	0.0631338	5	17	7.35978e-11	1.51979e-07
37659	AM861931	0	2	female gonad	0.20653	0.10135	-0.458977	0.0843309	-0.0647716	0.0553626	-0.234398	0.119792	-0.402197	0.10359	-0.591334	0.150914	29.4516	1.68207	0.194184	5	17	8.37656e-08	0.000107555
29603	AM862126	0	2	female gonad	1.05356	0.161887	-0.00707433	0.114675	0.930971	0.119194	0.614574	0.0703766	0.301776	0.028948	-0.124469	0.160488	62.8511	4.70456	0.254498	5	17	2.32447e-10	4.59548e-07
19352	AM862134	0	2	0	0.685796	0.173215	-0.203446	0.0813422	0.306689	0.0359023	-0.026484	0.0765824	-0.139631	0.0111657	-0.420032	0.00754561	81.3139	3.15073	0.131742	5	17	2.92179e-11	6.21464e-08
40348	AM862663	(sp:Q4R684) Archaemetzincin-2 OS=Macaca fascicularis GN=AMZ2 PE=2 SV=2	2	0	0.940826	0.134533	0.149991	0.10233	0.729866	0.0808708	0.520243	0.0728741	0.215419	0.162098	0.163073	0.153775	29.8227	2.14685	0.244756	5	17	7.62678e-08	9.8538e-05
19828	AM862743	0	2	female gonad	1.82432	0.0609258	0.849815	0.0435103	1.66118	0.11702	1.11108	0.0697107	0.902175	0.100211	0.739565	0.0755636	125.387	4.04516	0.109689	5	17	8.46434e-13	1.97812e-09
41840	AM862805	(sp:Q16760) Diacylglycerol kinase delta OS=Homo sapiens GN=DGKD PE=1 SV=4	2	0	0.917728	0.0601752	0.46965	0.0353407	0.589508	0.0785439	0.400397	0.065002	0.346545	0.0203571	0.419591	0.0771488	44.6593	0.846922	0.0644779	5	17	3.4625e-09	5.96242e-06
25433	AM863366	0	2	0	1.40264	0.0223232	1.0032	0.0732609	1.34744	0.0705651	1.24413	0.0445349	1.0393	0.0242393	0.811171	0.0495575	74.3547	1.02845	0.0470278	5	17	6.02434e-11	1.25366e-07
30818	AM863802	0	2	0	0.586608	0.0627254	-0.272288	0.151778	0.444915	0.105774	0.0978278	0.110805	-0.0688927	0.0734248	-0.389417	0.0511433	60.0919	3.00353	0.169939	5	17	3.32656e-10	6.47349e-07
327	AM863991	0	2	0	0.421452	0.0949255	-0.107768	0.105193	0.0192159	0.0430481	0.0707401	0.0967048	-0.0464311	0.0750118	-0.131145	0.11465	19.1583	0.814402	0.144531	5	17	1.90399e-06	0.0015746
30499	AM864064	0	2	0	0.893971	0.0387878	-0.217762	0.108447	0.611748	0.0948866	0.234141	0.0681258	-0.0359818	0.0792912	-0.362272	0.0713815	148.372	4.73875	0.10859	5	17	2.1072e-13	5.03832e-10
11532	AM864077	0	2	0	0.859545	0.0590512	-0.237681	0.148016	0.6472	0.0473066	0.280579	0.0909424	0.00577352	0.0346788	-0.435499	0.190819	78.4319	5.06009	0.219354	5	17	3.91351e-11	8.24186e-08
575	AM864180	0	2	0	0.608248	0.0351763	-0.582798	0.0980641	0.297037	0.285366	0.0533754	0.132595	0.411144	0.232948	0.14642	0.202236	20.101	3.3157	0.560835	5	17	1.35699e-06	0.00118873
43602	AM864268	0	2	0	0.741214	0.0594942	-0.193498	0.0363627	0.458556	0.0577376	0.128605	0.0472619	-0.000399639	0.134211	-0.152748	0.072603	109.508	2.67734	0.0831261	5	17	2.57716e-12	5.89654e-09
31236	AM864470	(sp:Q6ZVD7) Storkhead-box protein 1 OS=Homo sapiens GN=STOX1 PE=1 SV=2	2	female gonad	1.24267	0.0798702	0.0607688	0.115769	0.990642	0.094871	0.426837	0.0948396	0.0186258	0.035093	-0.0279759	0.0556635	156.365	5.75279	0.125088	5	17	1.36446e-13	3.28017e-10
26811	AM864980	0	2	0	0.558805	0.143443	-0.838961	0.12545	0.18269	0.108691	-0.464066	0.128799	-0.545594	0.420433	-1.06265	0.183582	39.7918	7.59304	0.648785	5	17	8.48408e-09	1.35915e-05
5509	AM865872	0	2	female gonad	1.49079	0.0537372	0.337875	0.0811114	1.23456	0.082362	0.827628	0.0527045	0.551317	0.218536	0.0730226	0.0487461	123.171	5.78647	0.159729	5	17	9.80327e-13	2.28514e-09
2783	AM866108	0	2	0	0.298842	0.0911872	-0.407615	0.120854	0.02567	0.132334	-0.147781	0.0322245	-0.294692	0.115162	-0.453064	0.0770984	32.7104	1.6237	0.168772	5	17	3.80098e-08	5.29096e-05
6134	AM866112	0	2	0	0.129372	0.144395	-0.989996	0.150702	-0.329657	0.120666	-0.315821	0.102541	-0.614334	0.157046	-0.923354	0.133875	39.0891	3.55255	0.309003	5	17	9.73511e-09	1.54399e-05
32647	AM866216	0	2	0	0.631358	0.0342105	-0.304888	0.0678651	0.197185	0.174844	0.0260361	0.0969445	-0.132125	0.118371	-0.148747	0.0760993	40.9945	2.20201	0.18263	5	17	6.73838e-09	1.09634e-05
44066	AM866550	0	2	female gonad	1.2045	0.110261	0.163301	0.0690806	0.919938	0.0704813	0.528366	0.140195	0.397736	0.160868	0.225336	0.0620363	60.2415	3.33026	0.187958	5	17	3.26128e-10	6.35296e-07
37015	AM866934	(sp:Q4I1B1) Vacuolar protein 8 OS=Gibberella zeae GN=VAC8 PE=3 SV=3	2	female gonad	0.596401	0.0464354	-0.0403842	0.0728957	0.581013	0.0693312	0.0854394	0.0834945	-0.102326	0.187273	-0.0826765	0.101607	44.5479	2.08142	0.158859	5	17	3.53059e-09	6.06556e-06
32445	AM867303	0	2	0	1.04559	0.0497753	0.205841	0.0893151	0.848103	0.0681203	0.604225	0.0372057	0.362234	0.0193259	-0.00802144	0.075109	159.505	3.14831	0.0671093	5	17	1.15685e-13	2.78801e-10
16536	AM867309	0	2	0	1.4832	0.150425	0.783153	0.0564919	1.32327	0.142856	0.983533	0.0741816	0.777392	0.0319858	0.632917	0.0415879	46.6327	2.22772	0.162424	5	17	2.46927e-09	4.35332e-06
29789	AM867405	0	2	female gonad	0.677318	0.0684449	-0.150264	0.0568359	0.339883	0.123501	-0.0570301	0.0702419	-0.118988	0.0749018	-0.0971914	0.0573179	71.3125	2.21029	0.105381	5	17	8.43658e-11	1.7295e-07
35788	AM867576	PREDICTED: similar to CG16854-PA [Apis mellifera]	2	0	0.366978	0.067058	-0.533793	0.225383	0.246551	0.0750268	0.0351186	0.026792	-0.166687	0.0147955	-0.463385	0.192923	31.0534	2.71278	0.297019	5	17	5.62876e-08	7.52565e-05
40644	AM868192	0	2	0	1.14026	0.0748814	0.500799	0.0538558	0.912628	0.0322079	0.748409	0.0866068	0.639827	0.0419388	0.597935	0.0438603	61.2849	1.08918	0.0604262	5	17	2.84371e-10	5.58504e-07
7088	AM868218	0	2	0	1.54877	0.0459466	0.684772	0.172285	1.2587	0.0591978	1.07854	0.055715	0.880842	0.0230581	0.656272	0.096613	56.4769	2.39646	0.144271	5	17	5.45028e-10	1.02956e-06
9103	AM868501	"(sp:P20801) Troponin C, skeletal muscle OS=Mus musculus GN=Tnnc2 PE=1 SV=2"	2	0	0.606899	0.148463	-0.0197169	0.134141	0.359586	0.0689613	0.424417	0.185999	0.0167266	0.122262	-0.275326	0.0514377	26.6339	2.162	0.275993	5	17	1.76944e-07	0.000209325
33938	AM868565	"(sp:P20801) Troponin C, skeletal muscle OS=Mus musculus GN=Tnnc2 PE=1 SV=2"	2	0	1.3815	0.119217	0.698782	0.12135	1.28524	0.0893036	1.34518	0.0778359	0.907857	0.101282	0.424429	0.10218	58.2119	3.09472	0.180754	5	17	4.28503e-10	8.19726e-07
27130	AM868678	0	2	0	1.65504	0.036686	0.686095	0.0966247	1.4405	0.0462678	1.12146	0.0864826	0.826365	0.117885	0.428353	0.122157	109.923	4.31505	0.133467	5	17	2.49833e-12	5.71869e-09
10096	AM868810	(sp:Q8TDM6) Disks large homolog 5 OS=Homo sapiens GN=DLG5 PE=1 SV=4	2	0	1.04711	0.0687655	0.423917	0.0870954	0.781836	0.115444	0.518248	0.075703	0.283884	0.0612715	0.141048	0.0729755	62.2022	2.15151	0.117603	5	17	2.52551e-10	4.97778e-07
27850	AM868912	0	2	0	1.20782	0.0321571	0.734142	0.0845971	0.954749	0.0436014	0.868867	0.0470032	0.740821	0.0263721	0.620556	0.0575087	60.3218	0.855435	0.0482161	5	17	3.22683e-10	6.29554e-07
39078	AM869049	0	2	0	0.844956	0.0257807	0.0950492	0.0699315	0.813072	0.113186	0.567925	0.054852	0.418506	0.0959802	0.0737252	0.0657064	80.8137	2.26994	0.0955009	5	17	3.0716e-11	6.521e-08
37098	AM869309	(sp:Q6YHK3) CD109 antigen OS=Homo sapiens GN=CD109 PE=1 SV=2	2	0	0.663049	0.0571355	-0.197911	0.100581	0.452317	0.0966248	0.163289	0.0441058	-0.190338	0.0955359	-0.393131	0.104369	91.4663	3.3606	0.124921	5	17	1.12306e-11	2.45613e-08
27808	AM869424	0	2	0	1.08463	0.0610692	0.450297	0.0527507	0.873093	0.0693769	0.616153	0.0272845	0.521529	0.0693233	0.508606	0.124681	45.0156	1.22411	0.0924564	5	17	3.25419e-09	5.62975e-06
32388	AM869532	0	2	0	1.758	0.0528453	1.21177	0.0515626	1.61331	0.0356036	1.44449	0.0319401	1.36825	0.0635829	1.16959	0.0283971	104.733	1.03877	0.0337221	5	17	3.71392e-12	8.41574e-09
27529	BQ426712	0	2	female gonad	2.0196	0.085633	1.0055	0.0409411	1.8819	0.149122	1.35829	0.0704675	1.07373	0.0276131	1.02536	0.104168	94.6592	3.97331	0.142715	5	17	8.48999e-12	1.87204e-08
30819	AM854075	0	2	0	0.687931	0.0813068	0.233048	0.0250135	0.469254	0.0500657	0.452835	0.0209291	0.3515	0.0249688	0.137476	0.0357708	71.9554	0.754025	0.0356288	5	17	7.84818e-11	1.61594e-07
37317	CU683023	0	2	0	1.23618	0.0606627	0.818588	0.0212969	1.02372	0.0762517	0.875888	0.16962	0.800244	0.0449403	0.831821	0.0559623	14.679	0.559488	0.129591	5	17	1.17801e-05	0.00662044
40950	CU683118	(sp:O55192) Sodium-dependent noradrenaline transporter OS=Mus musculus GN=Slc6a2 PE=2 SV=1	2	female gonad	0.665891	0.0427315	-0.534425	0.109922	0.416554	0.0831637	-0.204755	0.0653295	-0.424667	0.0192576	-0.488079	0.0785334	184.255	5.12243	0.0945228	5	17	3.4861e-14	8.49911e-11
6712	CU683250	0	2	0	1.48688	0.0751693	0.654582	0.0365111	1.18325	0.149111	0.993072	0.12626	0.785246	0.0650929	0.477649	0.067027	58.2411	2.69673	0.15743	5	17	4.26795e-10	8.16886e-07
4290	CU683290	0	2	0	-0.123428	0.139134	-1.19602	0.250737	-0.478419	0.0933314	-1.08774	0.0702509	-1.13328	0.0242447	-0.753524	0.242011	25.8858	3.53648	0.464504	5	17	2.18314e-07	0.000251061
37746	CU683708	(sp:Q04721) Neurogenic locus notch homolog protein 2 OS=Homo sapiens GN=NOTCH2 PE=1 SV=3	2	0	0.667733	0.0615807	0.20651	0.0636036	0.543981	0.0449373	0.278918	0.0271782	0.289708	0.100925	0.209754	0.0380988	44.3885	0.737804	0.0565131	5	17	3.63074e-09	6.21945e-06
188	AM854310	0	2	0	1.46096	0.0549166	0.938815	0.0728154	1.19111	0.139742	1.12247	0.0256805	0.869074	0.111115	0.506048	0.154113	39.1252	2.08815	0.181461	5	17	9.66601e-09	1.53496e-05
1886	CU684658	0	2	0	0.302437	0.080644	0.0107859	0.055478	0.0107629	0.0558504	-0.136059	0.0701128	-0.158675	0.0496564	-0.192091	0.0465018	34.5686	0.653425	0.0642678	5	17	2.49798e-08	3.65454e-05
23465	CU685275	0	2	female gonad	1.31378	0.0584578	0.715928	0.034341	0.86087	0.0928636	0.676705	0.0180224	0.704941	0.093668	0.654485	0.0825468	54.3062	1.25582	0.0786246	5	17	7.4374e-10	1.38336e-06
27610	CU685377	0	2	0	1.51544	0.090747	0.654611	0.0310499	1.35274	0.111093	0.936536	0.0678561	0.740539	0.0393647	0.286511	0.0543458	156.161	4.15182	0.0903952	5	17	1.3789e-13	3.31349e-10
29880	CU685916	0	2	0	1.5566	0.0295571	1.05838	0.0376376	1.33039	0.104894	1.17147	0.0579981	1.00943	0.0584564	0.913545	0.0562848	55.8133	1.0885	0.0663084	5	17	5.98642e-10	1.12245e-06
23658	CU984228	0	2	0	1.14936	0.0501145	0.543012	0.0669162	0.904988	0.136309	0.572353	0.0945738	0.408993	0.108927	0.350615	0.0741551	43.8603	1.85462	0.143768	5	17	3.98592e-09	6.77207e-06
43539	CU984315	0	2	0	1.37426	0.0312689	0.906321	0.087223	1.06523	0.0869046	0.96112	0.0899294	0.86922	0.0731668	0.675531	0.0714721	37.2551	1.08158	0.0987074	5	17	1.40913e-08	2.16583e-05
209	CU986455	0	3	0	0.456073	0.150874	-0.994798	0.0973711	0.118943	0.241104	-0.517321	0.039435	-0.616294	0.159458	-0.57152	0.19643	43.5107	5.6615	0.442399	5	17	4.24232e-09	7.14831e-06
30813	AM854593	0	3	female gonad	1.80957	0.112544	1.37839	0.05494	1.81339	0.103332	1.35414	0.0696951	1.37316	0.117427	1.46179	0.0908833	21.8934	0.940231	0.146016	5	17	7.38035e-07	0.000716632
3825	CU986831	(sp:Q32KN0) Zinc finger protein 572 OS=Bos taurus GN=ZNF572 PE=2 SV=1	3	0	0.891631	0.124907	0.0631098	0.126448	0.547824	0.103831	0.426301	0.0898094	0.275312	0.0576842	0.27721	0.051381	32.9798	1.6091	0.165887	5	17	3.57192e-08	5.0114e-05
14095	CU986845	0	3	female gonad	1.641	0.115726	0.93607	0.123206	1.47896	0.0925174	0.981017	0.0453304	1.04292	0.00389042	1.1733	0.0354791	45.6796	1.63057	0.121366	5	17	2.90236e-09	5.07042e-06
28814	CU987305	0	3	0	1.73328	0.0882771	1.38263	0.032108	1.51833	0.0813837	1.18289	0.0483903	1.20042	0.133674	1.29594	0.0394647	30.8883	0.851933	0.0937758	5	17	5.85922e-08	7.80448e-05
41404	CU987953	0	3	0	1.48417	0.0461644	1.01381	0.0192696	1.28279	0.109704	1.04479	0.0631113	1.08914	0.0660639	1.1029	0.050898	30.3564	0.643395	0.072062	5	17	6.67652e-08	8.79298e-05
6422	CU987966	0	3	female gonad	2.20165	0.126295	1.48587	0.0673874	2.07078	0.113324	1.48747	0.10379	1.40369	0.0206224	1.66154	0.0358573	53.7466	2.1661	0.137027	5	17	8.07304e-10	1.49674e-06
34600	CU988229	(sp:Q505G8) Zinc finger protein 827 OS=Mus musculus GN=Znf827 PE=2 SV=2	3	0	0.998385	0.0569066	0.494763	0.055399	0.870182	0.0572466	0.648955	0.0175972	0.581323	0.00798383	0.758922	0.0599553	57.284	0.683939	0.0405941	5	17	4.86919e-10	9.24659e-07
31677	CU988384	0	3	0	1.45955	0.0385818	1.14159	0.0513195	1.30405	0.14834	0.947608	0.106755	0.951555	0.0941467	1.0918	0.0765377	17.7635	0.772566	0.147872	5	17	3.22516e-06	0.00240919
23532	CU988677	0	3	0	2.00492	0.0672646	1.71574	0.016973	1.87941	0.0378083	1.67405	0.0278424	1.62011	0.0600908	1.65306	0.039113	45.3624	0.438457	0.0328631	5	17	3.06481e-09	5.32357e-06
9756	CU988731	0	3	0	1.24578	0.119532	0.508789	0.0392037	1.00315	0.176472	0.504098	0.0668771	0.337631	0.0410987	0.312291	0.0660758	56.2742	2.82688	0.170796	5	17	5.60814e-10	1.05826e-06
5652	CU989261	0	3	0	0.0844854	0.182158	-0.57309	0.182247	-0.379453	0.125196	-0.397725	0.0426296	-0.674614	0.0610504	-0.546145	0.023515	17.8871	1.3719	0.260773	5	17	3.07389e-06	0.00231157
28592	CU989320	0	3	female gonad	1.89433	0.0580537	1.33126	0.0348085	1.74713	0.123169	1.44838	0.0562567	1.2885	0.0395828	1.37798	0.0294796	53.4421	1.17089	0.0744924	5	17	8.44434e-10	1.55967e-06
5964	CU989923	0	3	0	1.77757	0.0513774	1.22683	0.0737831	1.62282	0.136602	1.28558	0.0936082	1.14509	0.117585	1.16078	0.037395	33.3051	1.35538	0.138366	5	17	3.31562e-08	4.67835e-05
30061	AM855015	(sp:P53992) Protein transport protein Sec24C OS=Homo sapiens GN=SEC24C PE=1 SV=3	3	0	1.78201	0.0690808	1.45892	0.0331051	1.51559	0.0431381	1.38161	0.036627	1.44012	0.0475691	1.54494	0.0344525	37.32	0.387449	0.0352982	5	17	1.39042e-08	2.14264e-05
12917	CU990759	(sp:Q96MN5) Uncharacterized protein C1orf83 OS=Homo sapiens GN=C1orf83 PE=1 SV=1	3	0	1.43658	0.102466	0.679735	0.10757	1.10035	0.200918	0.893664	0.0616036	0.676174	0.11114	0.933613	0.16987	17.1426	1.56287	0.309973	5	17	4.1225e-06	0.00291049
41862	CU991111	0	3	0	0.395076	0.124073	-1.14361	0.170349	-0.453491	0.211421	-0.945862	0.147412	-1.15147	0.0763261	-1.12404	0.373771	32.9225	7.39101	0.76329	5	17	3.61928e-08	5.06337e-05
43538	CU991230	0	3	0	1.09051	0.10362	0.427548	0.109458	0.80498	0.0369158	0.387332	0.0966237	0.234197	0.0768664	0.301938	0.0388847	62.3806	2.13936	0.116604	5	17	2.46838e-10	4.86765e-07
24593	CU991401	(sp:O11780) Transforming growth factor-beta-induced protein ig-h3 OS=Sus scrofa GN=TGFBI PE=1 SV=1	3	female gonad	1.97276	0.0888636	0.982896	0.127983	1.91873	0.0595113	1.05837	0.174466	0.776626	0.0662304	0.846325	0.0964726	90.2575	5.61357	0.211463	5	17	1.2516e-11	2.72849e-08
1250	CU991407	0	3	0	1.38534	0.180063	0.576119	0.113225	1.00575	0.148507	0.6392	0.0830011	0.627778	0.0716002	0.788859	0.0481717	26.7149	1.88398	0.239773	5	17	1.73017e-07	0.000205026
16194	AM237787	0	3	female gonad	1.68505	0.0600873	1.03917	0.0119208	1.4266	0.10501	0.921735	0.0607291	0.882662	0.0440832	1.00765	0.0296375	109.396	1.99245	0.0619248	5	17	2.59881e-12	5.94348e-09
40122	CU992292	0	3	0	1.50398	0.139323	1.18729	0.0627229	1.27957	0.0551603	1.04938	0.0866391	1.20925	0.0576575	1.40473	0.0236065	16.211	0.524486	0.110002	5	17	6.04061e-06	0.00390224
41066	CU992538	0	3	0	1.13346	0.0937025	0.29325	0.125182	0.946363	0.0958708	0.333278	0.101193	0.0914884	0.10604	0.232262	0.044153	73.5206	3.45943	0.159983	5	17	6.59842e-11	1.36785e-07
12235	CU993275	0	3	female gonad	1.75875	0.042547	1.10522	0.0820176	1.39606	0.0869436	1.04643	0.0124168	1.08217	0.0439209	1.21451	0.087028	65.2259	1.44516	0.0753312	5	17	1.72745e-10	3.46526e-07
42634	CU993381	(sp:Q9NZS9) Bifunctional apoptosis regulator OS=Homo sapiens GN=BFAR PE=1 SV=1	3	0	0.640477	0.139117	0.180617	0.0307854	0.533844	0.0986023	0.28741	0.102022	0.250084	0.0865865	0.277866	0.0622513	14.8853	0.647582	0.147916	5	17	1.07337e-05	0.00611821
26868	CU993488	0	3	0	1.80525	0.0652824	1.5692	0.0683858	1.76031	0.0795605	1.45982	0.0395247	1.55177	0.0718914	1.58604	0.0290421	18.6184	0.346952	0.0633585	5	17	2.32587e-06	0.00184209
42734	CU993877	0	3	0	1.36622	0.147959	0.616409	0.0516341	1.06204	0.114546	0.781342	0.0840454	0.541272	0.0530943	0.720376	0.0989141	36.8314	1.83309	0.169217	5	17	1.53841e-08	2.34608e-05
26884	AM855471	0	3	female gonad	2.22913	0.0648994	1.61846	0.0196489	2.12653	0.0871036	1.70534	0.0310281	1.58725	0.0424324	1.57693	0.0638161	102.075	1.65908	0.0552619	5	17	4.584e-12	1.03278e-08
17453	CU994233	(sp:Q9BYJ9) YTH domain family protein 1 OS=Homo sapiens GN=YTHDF1 PE=1 SV=1	3	0	0.27576	0.0753765	-0.197517	0.0158581	-0.0790787	0.066941	-0.195169	0.00556011	-0.262291	0.0369442	0.0217772	0.105294	37.8843	0.750168	0.0673253	5	17	1.23898e-08	1.92661e-05
25762	CU994857	0	3	0	1.73082	0.0823293	1.10621	0.0306479	1.44498	0.0674775	1.10562	0.049924	1.14825	0.077249	1.22407	0.067104	59.4836	1.21999	0.0697327	5	17	3.60762e-10	6.99878e-07
1009	CU995652	0	3	0	1.59934	0.0482674	1.42564	0.0737936	1.37957	0.0435092	1.21523	0.0390434	1.35553	0.0482803	1.53195	0.0360031	29.5093	0.365644	0.0421287	5	17	8.25476e-08	0.000106156
10229	CU995895	0	3	0	1.62802	0.0470483	1.24268	0.0521811	1.32125	0.119243	1.01232	0.0483921	0.978919	0.10144	1.15619	0.101824	31.248	1.06773	0.116176	5	17	5.36994e-08	7.22794e-05
35829	CU996722	(sp:Q6ZUK4) Transmembrane protein 26 OS=Homo sapiens GN=TMEM26 PE=1 SV=1	3	0	0.578625	0.153662	0.0232239	0.0400903	0.561932	0.169584	0.218203	0.0786816	0.0903198	0.0102605	0.16086	0.0374196	20.5631	1.11838	0.184917	5	17	1.15495e-06	0.00103253
26539	CU996826	"(sp:Q923Z3) Protein MTO1 homolog, mitochondrial OS=Mus musculus GN=Mto1 PE=2 SV=1"	3	female gonad	1.17803	0.118956	0.547105	0.092484	0.886044	0.0270677	0.350678	0.0660311	0.257531	0.00391042	0.498009	0.0720522	78.5956	2.28841	0.0989952	5	17	3.84806e-11	8.11555e-08
6118	CU996984	(sp:P25183) Regulator of chromosome condensation OS=Xenopus laevis GN=rcc1 PE=2 SV=1	3	female gonad	1.12676	0.0645573	0.318857	0.113719	0.875584	0.0584912	0.32812	0.0382236	0.242578	0.0612126	0.354547	0.0902328	90.3702	2.60123	0.0978659	5	17	1.23894e-11	2.70337e-08
35688	CU997057	0	3	0	2.23601	0.0451564	1.93439	0.0671824	2.12282	0.0161792	1.82975	0.0315523	1.84069	0.0692559	2.05153	0.0499044	42.061	0.500943	0.0404937	5	17	5.52134e-09	9.13229e-06
33379	CU997418	(sp:Q5ZIE8) Activating transcription factor 7-interacting protein 1 OS=Gallus gallus GN=ATF7IP PE=2 SV=1	3	female gonad	1.9345	0.117668	1.34364	0.00694656	1.68424	0.0528923	1.17489	0.12518	1.07261	0.177687	1.38633	0.0517556	39.3985	1.94983	0.168266	5	17	9.16048e-09	1.4611e-05
40720	CU997764	(sp:Q58CR3) Ligatin OS=Bos taurus GN=LGTN PE=2 SV=1	3	0	1.43722	0.0594126	1.19029	0.0683105	1.2519	0.0549412	1.005	0.039025	1.09393	0.0338263	1.38209	0.0848292	29.0451	0.530411	0.0620895	5	17	9.29389e-08	0.000117661
29538	CU997843	0	3	0	1.77013	0.0529738	0.909075	0.0391031	1.71055	0.0615555	1.26638	0.073553	1.13468	0.064178	1.01093	0.0444567	160.724	2.58907	0.05477	5	17	1.0858e-13	2.61786e-10
37385	CU998076	0	3	0	0.526656	0.108598	-0.305677	0.0935014	0.289049	0.26288	0.0375976	0.152388	-0.26997	0.0516881	-0.514899	0.13254	26.4207	3.08216	0.396635	5	17	1.87765e-07	0.000219122
42711	CU998200	0	3	0	1.47015	0.0684442	1.09898	0.0368254	1.17913	0.0321264	0.919762	0.0620914	0.909726	0.0974228	1.11802	0.0734663	39.9575	0.798665	0.0679588	5	17	8.21604e-09	1.32443e-05
32585	CU998901	(sp:Q9JJT9) Phosphorylated adapter RNA export protein OS=Mus musculus GN=Phax PE=1 SV=1	3	0	1.42271	0.0278401	0.972793	0.0521001	1.16752	0.0590719	0.88802	0.0293206	0.963688	0.0819831	1.00986	0.0386307	61.8381	0.753615	0.0414355	5	17	2.64678e-10	5.21152e-07
39633	CU999150	0	3	0	1.93392	0.0868874	1.54737	0.0920777	1.86911	0.108635	1.50318	0.0514537	1.4533	0.0819699	1.58685	0.158648	14.5819	0.773594	0.180376	5	17	1.23119e-05	0.00685774
6957	CU999287	0	3	0	2.0294	0.0267393	1.6634	0.0291025	1.74151	0.0763607	1.42897	0.00810793	1.50458	0.0531649	1.69613	0.0350594	91.0607	0.849447	0.0317164	5	17	1.16447e-11	2.54436e-08
3879	CU999660	(sp:Q8CG46) Structural maintenance of chromosomes protein 5 OS=Mus musculus GN=Smc5 PE=2 SV=1	3	female gonad	1.73549	0.032646	1.17936	0.0563838	1.53375	0.129034	1.04237	0.0376765	1.01802	0.103919	1.27268	0.0451669	55.3314	1.54051	0.0946611	5	17	6.41272e-10	1.19982e-06
21159	CX068842	0	3	0	1.97474	0.0483107	1.57595	0.0417492	1.71509	0.0503504	1.37206	0.0242442	1.51217	0.046388	1.66504	0.0580122	77.997	0.82584	0.0359995	5	17	4.09356e-11	8.60875e-08
28925	CX068864	0	3	0	1.21901	0.0217053	0.743821	0.0410155	1.17901	0.0700806	0.887561	0.0618233	0.900565	0.0403181	0.990831	0.0404027	55.0766	0.661058	0.0408086	5	17	6.65183e-10	1.24256e-06
33787	CX739615	0	3	0	1.44875	0.105443	1.07558	0.0203964	1.20846	0.142976	0.878566	0.0474419	0.892475	0.119884	1.06935	0.014202	22.2648	0.8646	0.132031	5	17	6.53959e-07	0.000648073
31883	DV736469	0	3	female gonad	1.71118	0.0559427	1.16665	0.0683561	1.39266	0.0823042	1.03448	0.02938	0.956873	0.0713486	1.22472	0.076151	64.5786	1.40356	0.0738961	5	17	1.87111e-10	3.74221e-07
30046	DV736867	0	3	female gonad	2.31425	0.0740321	1.45516	0.113141	2.18994	0.0542207	1.54861	0.0732319	1.43002	0.0815624	1.54069	0.0445563	104.31	3.03769	0.0990137	5	17	3.83915e-12	8.688e-09
21149	EE677686	0	3	0	2.12462	0.0738108	1.73655	0.0583767	1.99398	0.041004	1.79558	0.0599379	1.72888	0.0250398	1.85668	0.0740492	26.7511	0.472811	0.0600931	5	17	1.71296e-07	0.000203328
27221	ES789154	(sp:Q5R8K4) Zinc finger protein 207 OS=Pongo abelii GN=ZNF207 PE=2 SV=1	3	0	1.82138	0.0718757	1.42167	0.0599895	1.68942	0.0557889	1.38947	0.025506	1.45283	0.0214137	1.61168	0.053626	41.5765	0.576296	0.0471277	5	17	6.04077e-09	9.90686e-06
41893	ES789581	0	3	0	1.2509	0.0757888	0.678518	0.0679596	0.91925	0.0897628	0.666024	0.121845	0.71914	0.0592676	0.683617	0.0912518	27.3845	1.06158	0.131804	5	17	1.44048e-07	0.00017545
43060	ES789885	hypothetical protein BRAFLDRAFT_127065 [Branchiostoma floridae]	3	0	1.90682	0.0690454	0.932234	0.123929	1.87408	0.0694097	1.01265	0.13744	0.732226	0.0862346	0.894289	0.0781045	107.838	5.22295	0.164674	5	17	2.92333e-12	6.65057e-09
13706	EW778120	0	3	0	1.47211	0.0603505	1.26055	0.125844	1.22008	0.0736575	0.892558	0.0923436	0.996136	0.0546789	1.27782	0.0820297	22.5524	0.838826	0.126462	5	17	5.96196e-07	0.0005956
25845	EW778366	0	3	0	0.695444	0.0974341	0.270266	0.0288559	0.343552	0.0498929	-0.00900673	0.0561597	0.138857	0.0737572	0.319182	0.0395818	58.7982	1.09794	0.0634883	5	17	3.9565e-10	7.59252e-07
25410	EW779300	(sp:Q6P9L4) Ubiquitin carboxyl-terminal hydrolase 49 OS=Mus musculus GN=Usp49 PE=2 SV=1	3	female gonad	1.42376	0.145967	0.800269	0.115787	1.0603	0.131181	0.557793	0.0631617	0.578128	0.0286784	0.898615	0.0565859	38.3549	2.01909	0.178984	5	17	1.12669e-08	1.76778e-05
43129	FP000189	(sp:O11780) Transforming growth factor-beta-induced protein ig-h3 OS=Sus scrofa GN=TGFBI PE=1 SV=1	3	0	1.59737	0.11381	0.492632	0.112794	1.65109	0.0695026	0.786927	0.13692	0.488638	0.0938176	0.629213	0.105723	96.2955	5.63313	0.198895	5	17	7.38165e-12	1.6402e-08
44340	FP000451	0	3	0	0.737438	0.0502409	-0.134817	0.118856	0.530475	0.0799711	0.364769	0.0633561	0.276884	0.0879592	0.246953	0.129361	40.0012	1.72779	0.146858	5	17	8.14688e-09	1.31491e-05
8139	FP000492	0	3	0	-0.0266884	0.0983707	-0.48311	0.0682614	-0.253521	0.0256262	-0.289674	0.0700953	-0.297393	0.0951892	-0.563022	0.148017	16.8065	0.709674	0.143569	5	17	4.72248e-06	0.0032349
4650	FP001184	(sp:Q6NSM8) Serine/threonine-protein kinase SIK3 homolog OS=Danio rerio GN=zgc:66101 PE=2 SV=1	3	0	1.55823	0.0609968	1.43429	0.0462331	1.37697	0.0682079	1.20349	0.0264901	1.24768	0.0281371	1.48442	0.0461583	29.194	0.357297	0.0416117	5	17	8.94555e-08	0.000113877
23018	FP001572	0	3	0	1.39411	0.0308444	0.730655	0.0912491	1.07976	0.0555453	0.648955	0.0749974	0.63495	0.0977058	0.847433	0.133379	45.5687	1.69443	0.126426	5	17	2.95804e-09	5.14995e-06
35540	FP001699	0	3	0	1.48973	0.0663015	1.06121	0.0458375	1.27652	0.0854195	0.896796	0.0772438	1.0112	0.0906173	1.19506	0.0886493	30.0221	0.87664	0.0992793	5	17	7.25512e-08	9.45343e-05
15464	FP001741	0	3	0	1.93887	0.107475	1.60825	0.00910167	1.73727	0.0738926	1.54824	0.0090433	1.61289	0.0536946	1.75617	0.0683098	18.8191	0.394603	0.071292	5	17	2.15793e-06	0.00173713
3573	FP002000	(sp:Q6AXZ4) Cep57-related protein OS=Rattus norvegicus GN=Cep57r PE=2 SV=1	3	0	1.80769	0.123134	1.57307	0.00843463	1.5544	0.150068	0.96607	0.0882986	1.50904	0.0341273	1.85534	0.0697958	44.4779	2.00927	0.153594	5	17	3.57419e-09	6.13331e-06
18847	FP002061	(sp:Q6TQE1) Zinc finger CCCH domain-containing protein 18 OS=Rattus norvegicus GN=Zc3h18 PE=1 SV=1	3	0	1.53265	0.131649	1.03372	0.0311434	1.14224	0.130739	0.786885	0.0546674	0.855154	0.0534556	1.0129	0.0467809	36.1387	1.35444	0.127428	5	17	1.7793e-08	2.67785e-05
15312	FP002353	(sp:Q8IY18) Structural maintenance of chromosomes protein 5 OS=Homo sapiens GN=SMC5 PE=1 SV=2	3	female gonad	1.80391	0.0871258	1.19362	0.152903	1.73182	0.097232	1.19257	0.0174154	1.17609	0.156987	1.51399	0.0598788	29.6268	1.5879	0.182229	5	17	8.01282e-08	0.000103125
30407	FP003532	(sp:Q6YGZ5) Aryl hydrocarbon receptor nuclear translocator-like protein 1 OS=Tyto alba GN=ARNTL PE=2 SV=1	3	female gonad	1.58221	0.101265	0.720016	0.0550763	1.37281	0.0709755	0.669198	0.024177	0.470002	0.125862	0.658475	0.122092	98.6793	3.86394	0.133132	5	17	6.04516e-12	1.3517e-08
22369	FP003616	(sp:Q8AY29) Ceramide glucosyltransferase-A OS=Xenopus laevis GN=ugcg-A PE=1 SV=1	3	0	1.87459	0.0773155	1.58123	0.0632916	1.63706	0.0841426	1.33846	0.0685868	1.27635	0.0422521	1.50054	0.0284125	41.4271	0.868691	0.0712952	5	17	6.21185e-09	1.01564e-05
31004	FP003625	0	3	0	2.2633	0.173256	1.37705	0.188046	2.02622	0.0683937	1.44595	0.185483	1.34262	0.205983	1.3487	0.0403534	26.8337	3.18156	0.403124	5	17	1.67435e-07	0.000199749
14788	FP003696	0	3	0	0.991482	0.0713544	0.445369	0.0568021	0.684686	0.0441042	0.540928	0.102257	0.609675	0.125638	0.55102	0.0638397	23.3383	0.727299	0.105955	5	17	4.6536e-07	0.000482113
2145	FP003977	0	3	0	2.23613	0.0836817	1.97447	0.0249122	2.12251	0.0402384	1.99075	0.0514159	1.95066	0.0564456	1.96678	0.0404832	18.321	0.252974	0.0469468	5	17	2.60234e-06	0.00202723
2637	AM856777	(sp:Q86VS8) Protein Hook homolog 3 OS=Homo sapiens GN=HOOK3 PE=1 SV=2	3	0	0.931914	0.0756083	0.561539	0.0818922	0.561571	0.0829372	0.30226	0.0420135	0.280743	0.0585582	0.455166	0.0115933	51.6282	1.06994	0.0704613	5	17	1.10935e-09	2.02235e-06
31518	FP004272	(sp:Q9Y5W8) Sorting nexin-13 OS=Homo sapiens GN=SNX13 PE=1 SV=4	3	female gonad	0.674035	0.0340021	0.166485	0.0880953	0.344615	0.0988766	0.00378404	0.0723389	0.0516717	0.0819555	0.131979	0.056919	42.7963	1.19492	0.094932	5	17	4.8257e-09	8.07822e-06
20713	AM856791	conserved hypothetical protein [Culex quinquefasciatus]	3	0	1.45505	0.0755314	0.828306	0.0383035	1.22768	0.116209	0.793871	0.0698429	0.78606	0.094413	0.9903	0.0289683	50.7698	1.44857	0.0970094	5	17	1.26619e-09	2.29561e-06
42554	FP004536	(sp:A2BIL7) Tyrosine-protein kinase BAZ1B OS=Danio rerio GN=baz1b PE=1 SV=2	3	female gonad	1.11254	0.0693378	0.449954	0.0763014	0.99559	0.09149	0.59263	0.029677	0.453074	0.0614491	0.513055	0.0238016	81.3731	1.64885	0.0688939	5	17	2.90462e-11	6.18394e-08
16914	FP004794	(sp:Q8CD19) LanC-like protein 3 OS=Mus musculus GN=Lancl3 PE=2 SV=2	3	0	0.745025	0.0726686	0.231079	0.0456986	0.197179	0.156452	-0.063778	0.0671847	-0.0702061	0.174262	0.0276747	0.0622613	33.8279	1.80525	0.181444	5	17	2.94564e-08	4.22111e-05
19612	FP005449	0	3	0	1.23934	0.227686	0.452152	0.134598	0.666443	0.0662511	0.41761	0.155334	0.314039	0.0450398	0.249689	0.133013	24.9239	2.58446	0.35256	5	17	2.88268e-07	0.000319401
1911	FP005482	0	3	0	2.26797	0.0762082	1.99917	0.0817246	2.12277	0.0862057	1.83958	0.0954029	1.9484	0.0706365	2.18835	0.0212035	17.2912	0.500361	0.098387	5	17	3.8848e-06	0.00279317
30198	FP005723	0	3	0	2.04808	0.0429418	1.53702	0.0384331	1.8685	0.044733	1.5923	0.0471469	1.56862	0.0182071	1.51833	0.109843	53.3669	0.933834	0.0594944	5	17	8.53884e-10	1.57542e-06
23728	AM856975	0	3	0	0.227363	0.0900806	-0.437628	0.0436229	-0.300659	0.189355	-0.451967	0.0775277	-0.45382	0.0726715	-0.448864	0.199596	17.1316	1.4397	0.285728	5	17	4.14074e-06	0.00291508
29861	FP008058	(sp:A2AJK6) Chromodomain-helicase-DNA-binding protein 7 OS=Mus musculus GN=Chd7 PE=2 SV=1	3	0	2.16112	0.0526015	1.85603	0.0641095	1.98841	0.0490722	1.72062	0.0445622	1.75974	0.0252682	1.83053	0.0726778	34.519	0.517131	0.0509356	5	17	2.52546e-08	3.69222e-05
6924	FP008073	0	3	0	1.94979	0.0940609	1.45435	0.119962	1.75106	0.0841362	1.51257	0.047522	1.41302	0.0804404	1.55072	0.068632	21.9714	0.806472	0.124799	5	17	7.1943e-07	0.000700724
877	FP009879	0	3	0	0.991603	0.133552	0.688781	0.0855886	0.56368	0.124438	0.283202	0.0470645	0.263593	0.113335	0.57178	0.0835426	26.7405	1.37801	0.175212	5	17	1.71797e-07	0.000203751
2813	FP010060	0	3	0	1.66676	0.198506	0.986576	0.0614383	1.35451	0.163592	1.06491	0.0899892	0.986541	0.0871109	0.78459	0.177031	19.6618	1.98535	0.343316	5	17	1.58629e-06	0.00135786
42361	FP010213	0	3	female gonad	1.34712	0.0674944	1.0219	0.0668698	1.24466	0.0830368	1.01197	0.0366405	0.947182	0.0387221	1.12932	0.0875011	19.3765	0.443165	0.0777622	5	17	1.75829e-06	0.00148048
22321	FP010698	"PREDICTED: similar to cytochrome P450, family 3, subfamily A, polypeptide 65 [Ciona intestinalis]"	3	0	0.688228	0.0663993	0.199155	0.0729991	0.427566	0.0607106	0.28816	0.0940874	0.232512	0.0174969	0.226416	0.0438973	32.0596	0.690423	0.073221	5	17	4.42518e-08	6.05364e-05
27260	FP010798	0	3	0	-0.240856	0.080147	-0.450016	0.0651194	-0.57524	0.105168	-0.714285	0.0786413	-0.634982	0.0431712	-0.334998	0.13562	15.3433	0.64366	0.142632	5	17	8.76178e-06	0.0052483
24220	FP011223	(sp:A7YWD2) Importin-13 OS=Bos taurus GN=IPO13 PE=2 SV=1	3	0	1.77211	0.0472466	1.46143	0.0601882	1.54712	0.0575155	1.27886	0.0133881	1.3768	0.0670566	1.47328	0.0813366	33.036	0.552541	0.0568665	5	17	3.52609e-08	4.95063e-05
2102	AM857424	(sp:Q5ZJI0) Protein-tyrosine sulfotransferase 2 OS=Gallus gallus GN=TPST2 PE=2 SV=1	3	female gonad	0.818107	0.0323574	0.184023	0.0866815	0.428305	0.0541303	0.0771568	0.0349578	-0.0101764	0.0243733	0.11894	0.0539295	127.642	1.80395	0.0480518	5	17	7.30749e-13	1.71141e-09
21172	AY713399	(sp:P54145) Putative ammonium transporter 1 OS=Caenorhabditis elegans GN=amt-1 PE=2 SV=1	3	0	1.00408	0.104942	-0.473409	0.351272	0.827022	0.150568	-0.0838227	0.152631	-0.463664	0.119334	-0.601965	0.064866	56.7298	9.71447	0.582219	5	17	5.26021e-10	9.94705e-07
6946	AM857527	(sp:Q6PFK1) Zinc finger protein 598 OS=Danio rerio GN=znf598 PE=1 SV=2	3	0	1.02608	0.0769727	0.55187	0.0459789	0.772167	0.0795674	0.473297	0.0500744	0.443595	0.0727497	0.627138	0.0578654	43.7658	0.917305	0.071262	5	17	4.05351e-09	6.86665e-06
20055	AM858106	0	3	0	1.49351	0.0752818	1.12181	0.113808	1.36401	0.0820233	1.0203	0.0842644	1.08082	0.068668	1.24911	0.0693824	17.9629	0.640409	0.121216	5	17	2.98508e-06	0.00226568
36291	AM863056	0	3	female gonad	2.05195	0.0371006	1.20188	0.055927	1.82969	0.104946	1.2579	0.0647599	1.16104	0.0626353	1.2577	0.0317068	136.3	2.8061	0.0699978	5	17	4.25215e-13	1.00606e-09
12039	CU987771	(sp:B3CP03) Chaperone protein dnaJ OS=Wolbachia pipientis subsp. Culex pipiens (strain wPip) GN=dnaJ PE=3 SV=1	3	female gonad	1.64941	0.0237822	1.01036	0.0888758	1.45157	0.0856459	1.01929	0.0123523	0.936948	0.0574199	1.11412	0.0215576	95.6481	1.57102	0.0558451	5	17	7.79965e-12	1.7284e-08
40688	AM857926	(sp:Q80W71) Pleckstrin homology domain-containing family A member 8 OS=Mus musculus GN=Plekha8 PE=2 SV=2	3	0	0.973694	0.0994869	0.573129	0.0545957	0.762153	0.11736	0.6304	0.0532464	0.533286	0.0230489	0.739354	0.0963247	14.092	0.486417	0.117359	5	17	1.54372e-05	0.00815082
26676	AM856101	0	3	female gonad	1.99522	0.105956	1.58726	0.0288779	1.7026	0.108639	1.34757	0.0627842	1.34365	0.0442088	1.63251	0.051288	39.9978	1.12011	0.0952147	5	17	8.15213e-09	1.31494e-05
36702	AM858149	(sp:Q9WV89) Syntaxin-binding protein 4 OS=Mus musculus GN=Stxbp4 PE=1 SV=1	3	0	0.883624	0.0968431	0.24978	0.0746073	0.569834	0.100721	0.317467	0.0574983	0.252199	0.0073676	0.179227	0.0518164	51.844	1.42343	0.0933504	5	17	1.07342e-09	1.96006e-06
15861	AM863724	0	3	0	0.864604	0.0941468	0.176474	0.0381347	0.682111	0.144601	0.258181	0.170928	0.267327	0.0323161	0.170509	0.0847156	28.5942	1.72364	0.20495	5	17	1.04451e-07	0.000130668
24401	AM865015	(sp:Q9NXS3) Kelch-like protein 28 OS=Homo sapiens GN=KLHL28 PE=2 SV=2	3	0	0.82934	0.0494226	0.553355	0.0796763	0.606188	0.0909464	0.338454	0.0401418	0.386488	0.0646828	0.533133	0.0594391	26.5266	0.585046	0.0749873	5	17	1.823e-07	0.000214567
39790	BQ426942	0	3	0	2.30957	0.0738024	1.9202	0.0395365	2.17818	0.0645217	1.9241	0.0916293	1.86844	0.0106678	2.01279	0.0397024	30.4016	0.569254	0.0636632	5	17	6.60234e-08	8.71509e-05
36209	AM854458	(sp:Q4R6Y6) snRNA-activating protein complex subunit 3 OS=Macaca fascicularis GN=SNAPC3 PE=2 SV=1	3	0	0.732544	0.0687869	0.334946	0.129041	0.556795	0.0549324	0.362181	0.041105	0.419035	0.0460084	0.646634	0.0808148	17.1897	0.516185	0.102098	5	17	4.04546e-06	0.00287632
37925	AM861996	(sp:B2GUV7) Eukaryotic translation initiation factor 5B OS=Rattus norvegicus GN=Eif5b PE=1 SV=1	3	0	1.65881	0.037898	1.39569	0.0426595	1.53901	0.0518855	1.18045	0.0952367	1.37295	0.0304419	1.53636	0.0786405	28.887	0.556169	0.0654611	5	17	9.6806e-08	0.000122072
9808	AM859722	(sp:Q9H8W5) Tripartite motif-containing protein 45 OS=Homo sapiens GN=TRIM45 PE=1 SV=2	3	0	0.247571	0.191128	-1.51014	0.228944	-0.438302	0.286293	-0.898856	0.244086	-1.34036	0.236878	-1.32577	0.433374	22.0714	8.87481	1.36712	5	17	6.96325e-07	0.000681702
13349	AM860152	0	3	0	1.07622	0.0609218	0.0311554	0.0921841	0.54515	0.198701	0.100364	0.170877	-0.134543	0.040105	-0.135615	0.111321	52.7805	4.39422	0.283065	5	17	9.31848e-10	1.71087e-06
44139	AM864483	(sp:Q9H4L7) SWI/SNF-related matrix-associated actin-dependent regulator of chromatin subfamily A containing DEAD/H box 1 OS=Homo sapiens GN=SMARCAD1 PE=1 SV=1	3	0	1.44782	0.061719	0.786263	0.127695	1.19527	0.133194	0.746002	0.0835777	0.676251	0.158804	0.97981	0.057276	29.7792	1.70619	0.194802	5	17	7.7107e-08	9.94681e-05
7685	ES789658	0	3	0	2.05289	0.0514798	1.70336	0.175769	1.92254	0.0848135	1.56795	0.0417018	1.5378	0.106975	1.76295	0.0338647	16.7178	0.756037	0.153759	5	17	4.89663e-06	0.00330033
1482	AM861011	(sp:Q6P6X9) Nucleoporin NUP53 OS=Danio rerio GN=nup35 PE=1 SV=1	3	0	2.05745	0.0582571	1.39262	0.0878213	1.87442	0.161534	1.36905	0.0633653	1.21507	0.082407	1.38872	0.0787577	46.1902	2.11707	0.155834	5	17	2.66063e-09	4.66675e-06
21430	AM858915	(sp:O75925) E3 SUMO-protein ligase PIAS1 OS=Homo sapiens GN=PIAS1 PE=1 SV=2	3	0	0.600191	0.0571099	0.296805	0.0401068	0.228036	0.0510018	-0.123835	0.0114518	-0.154592	0.0862983	0.180653	0.0533295	108.433	1.4745	0.0462342	5	17	2.79432e-12	6.37105e-09
40079	AM865151	(sp:A8CG34) Nuclear envelope pore membrane protein POM 121C OS=Homo sapiens GN=POM121C PE=1 SV=2	3	female gonad	1.83351	0.0300832	1.41827	0.0668536	1.53223	0.0438771	1.0535	0.0705226	1.20505	0.0156867	1.3512	0.079325	86.2595	1.42553	0.0561887	5	17	1.8094e-11	3.90649e-08
13596	AM861928	"(sp:Q9Y2C4) Nuclease EXOG, mitochondrial OS=Homo sapiens GN=ENDOGL1 PE=1 SV=2"	3	0	0.552716	0.0869928	-0.22808	0.128607	0.238576	0.0688879	-0.0493798	0.0741563	-0.177142	0.0185858	-0.193743	0.190117	30.2436	1.88739	0.212181	5	17	6.86581e-08	9.00107e-05
13172	AM861832	0	3	0	0.960708	0.0373279	0.544929	0.0139637	0.622846	0.0949421	0.34322	0.0707281	0.51496	0.0912005	0.598796	0.0657244	36.4914	0.820075	0.0764086	5	17	1.65177e-08	2.50739e-05
33888	CU984132	0	3	female gonad	1.32739	0.132091	0.653261	0.0397912	1.19653	0.105608	0.739097	0.0587036	0.683063	0.126849	0.667372	0.0994153	37.2497	1.78276	0.162723	5	17	1.41072e-08	2.16686e-05
21385	AM854790	(sp:Q5F3Z9) Zinc finger CCCH domain-containing protein 14 OS=Gallus gallus GN=ZC3H14 PE=2 SV=1	3	0	0.996681	0.0307052	0.546415	0.0500155	0.87982	0.0778441	0.636301	0.0364625	0.618184	0.0530352	0.683027	0.0178817	51.3648	0.590475	0.0390854	5	17	1.15505e-09	2.10334e-06
31906	AM857863	(sp:P47442) DnaJ-like protein MG200 OS=Mycoplasma genitalium GN=MG200 PE=4 SV=1	3	0	1.38462	0.0728343	1.09783	0.0353017	1.07562	0.0290941	0.970186	0.0211416	0.94014	0.0676067	1.10603	0.0521953	39.1629	0.470505	0.0408478	5	17	9.59456e-09	1.52554e-05
28795	DV736602	0	3	0	2.10563	0.0634057	1.83053	0.0218652	2.02964	0.0421835	1.9163	0.0123479	1.85256	0.0367661	1.78769	0.0746724	26.4642	0.301398	0.0387223	5	17	1.855e-07	0.000217221
4373	AM862715	0	3	0	1.47477	0.139486	0.730483	0.0828633	1.14305	0.143977	0.75651	0.0419231	0.711469	0.0440506	0.897	0.0614102	37.2625	1.77132	0.161624	5	17	1.40698e-08	2.16535e-05
9984	AM857892	0	3	0	1.98811	0.0550839	1.62117	0.0790756	1.72193	0.106881	1.41284	0.0848086	1.40227	0.0417848	1.67005	0.0732805	29.345	0.891671	0.103312	5	17	8.6071e-08	0.000110257
34995	AM857428	0	3	0	1.37771	0.0685497	0.910131	0.0641642	0.93288	0.140508	0.930635	0.0382543	0.827502	0.116215	0.858552	0.0322688	22.6175	0.799603	0.120201	5	17	5.83926e-07	0.000586846
35320	AM853943	0	3	female gonad	0.518558	0.0593806	-0.0357725	0.0148342	0.15308	0.119898	-0.17649	0.0918911	-0.198918	0.102402	0.139134	0.120037	32.0104	1.35475	0.143896	5	17	4.47685e-08	6.11986e-05
33781	DV736650	0	3	female gonad	1.65622	0.0542358	1.07428	0.0612587	1.46883	0.0713849	1.13863	0.026632	1.10668	0.0890575	1.04617	0.0278189	76.4512	1.25204	0.0556818	5	17	4.81274e-11	1.00827e-07
5623	AM857917	(sp:P46060) Ran GTPase-activating protein 1 OS=Homo sapiens GN=RANGAP1 PE=1 SV=1	3	female gonad	0.818733	0.0924778	0.389976	0.0966471	0.663343	0.108333	0.222671	0.0828136	0.244716	0.168553	0.480254	0.0127007	21.5456	1.05678	0.166765	5	17	8.27835e-07	0.000790582
40375	AM858892	(sp:Q4R7X8) Zinc finger protein 322A OS=Macaca fascicularis GN=ZNF322A PE=2 SV=1	3	0	1.44593	0.0610507	0.644332	0.0687346	1.24037	0.11727	0.776139	0.0863325	0.625754	0.0616584	0.719762	0.0654085	72.2146	2.32381	0.10941	5	17	7.62412e-11	1.57286e-07
27044	AM857933	(sp:Q4G0N4) UPF0465 protein C5orf33 OS=Homo sapiens GN=C5orf33 PE=1 SV=2	3	female gonad	0.710279	0.0877551	0.110129	0.0985924	0.377453	0.111431	0.0223239	0.0627099	-0.0746731	0.033954	0.186098	0.121959	34.9836	1.52528	0.14824	5	17	2.28071e-08	3.36405e-05
39681	AM861438	0	3	0	2.26101	0.031552	1.95859	0.0678314	2.11528	0.0641632	1.8162	0.038034	1.85608	0.105207	1.93333	0.0523247	29.146	0.547182	0.0638309	5	17	9.05615e-08	0.000115013
10641	ES789173	(sp:P82198) Transforming growth factor-beta-induced protein ig-h3 OS=Mus musculus GN=Tgfbi PE=2 SV=1	3	0	1.72843	0.135106	0.664915	0.111927	1.76964	0.0601659	0.906657	0.151472	0.631466	0.0958837	0.804673	0.0665611	88.2436	5.28717	0.203713	5	17	1.50393e-11	3.26503e-08
7113	AM860347	0	3	female gonad	1.48078	0.021643	0.608946	0.0393708	1.18357	0.101007	0.695812	0.0338173	0.491831	0.079075	0.781341	0.0899135	120.796	2.73043	0.0768524	5	17	1.15086e-12	2.66999e-09
6000	AM854101	"(sp:Q6PDU1) Splicing factor, arginine/serine-rich 2 OS=Rattus norvegicus GN=Sfrs2 PE=1 SV=3"	3	0	2.10561	0.100133	1.75559	0.0615081	1.9072	0.0770293	1.56905	0.013562	1.59193	0.0999665	1.79819	0.0148746	32.5656	0.770389	0.0804322	5	17	3.93085e-08	5.45209e-05
34143	AM855073	0	3	female gonad	1.73615	0.050888	1.32421	0.0372994	1.57342	0.0985234	1.26792	0.0246601	1.25561	0.0178267	1.39141	0.0648862	42.6343	0.704139	0.0561537	5	17	4.97006e-09	8.28508e-06
21773	DW713990	0	3	female gonad	2.26739	0.100605	1.81698	0.0235996	2.0471	0.082712	1.56713	0.0988394	1.72957	0.0733999	1.89145	0.0580545	39.1671	1.18368	0.102752	5	17	9.58655e-09	1.52522e-05
13452	AM857825	(sp:Q09472) Histone acetyltransferase p300 OS=Homo sapiens GN=EP300 PE=1 SV=2	3	0	1.30307	0.0228157	0.978831	0.0348426	1.08547	0.0831387	0.742344	0.0657942	0.868301	0.0521609	1.03968	0.0602705	44.3263	0.720505	0.0552656	5	17	3.67069e-09	6.28055e-06
1951	AM859620	(sp:Q6DRM0) Tryptophan-rich protein OS=Danio rerio GN=wrb PE=2 SV=1	3	female gonad	1.63047	0.117628	0.934895	0.121738	1.34189	0.0549991	0.871942	0.100903	1.02086	0.103124	1.29368	0.0483757	36.7249	1.66211	0.153878	5	17	1.57295e-08	2.39717e-05
21354	AM864028	(sp:Q8R409) Protein HEXIM1 OS=Mus musculus GN=Hexim1 PE=1 SV=1	3	female gonad	2.34143	0.0670989	1.76683	0.0564596	2.34047	0.0300061	1.7627	0.0429582	1.90776	0.146927	1.95367	0.122565	39.8272	1.40038	0.119549	5	17	8.426e-09	1.35322e-05
11210	AM854424	(sp:Q9CY50) Translocon-associated protein subunit alpha OS=Mus musculus GN=Ssr1 PE=1 SV=1	3	0	1.61997	0.0702695	1.3276	0.0700048	1.39599	0.0336167	1.30875	0.0485399	1.28179	0.0479139	1.39658	0.0453851	19.3474	0.28876	0.050745	5	17	1.77699e-06	0.00149445
11560	AM858302	0	3	0	1.44964	0.0489545	0.928045	0.116548	1.16516	0.139593	0.965673	0.0367596	0.919008	0.0398482	1.00388	0.0453723	23.3013	0.821057	0.119804	5	17	4.70753e-07	0.000486287
38010	AM861245	(sp:Q5RD67) Solute carrier family 25 member 44 OS=Pongo abelii GN=SLC25A44 PE=2 SV=2	3	0	0.923842	0.116996	0.114085	0.0845605	0.525013	0.0594589	0.407104	0.144717	0.304775	0.19821	0.436251	0.0730813	21.2629	1.4418	0.230548	5	17	9.09896e-07	0.000850753
34596	AM865625	0	3	0	1.67131	0.0638221	1.25019	0.112314	1.49142	0.0882756	1.25172	0.0780837	1.28683	0.0315445	1.51374	0.0512498	19.7329	0.589678	0.101602	5	17	1.54638e-06	0.00133298
5770	AM862673	(sp:Q9UBB5) Methyl-CpG-binding domain protein 2 OS=Homo sapiens GN=MBD2 PE=1 SV=1	3	0	1.60752	0.0857599	1.11562	0.0356846	1.42793	0.080879	1.21559	0.0490941	1.15527	0.0145224	1.26373	0.0528848	37.3405	0.67599	0.0615516	5	17	1.38459e-08	2.13503e-05
31421	CU685516	(sp:Q5RBN9) Transcriptional adapter 2-beta OS=Pongo abelii GN=TADA2B PE=2 SV=1	3	0	1.32942	0.0444898	0.827193	0.0490202	1.1559	0.0407329	0.936066	0.0365406	0.91443	0.0593569	1.06754	0.0668466	52.95	0.663153	0.042582	5	17	9.08523e-10	1.66987e-06
31789	AM867572	(sp:O43193) Motilin receptor OS=Homo sapiens GN=MLNR PE=2 SV=1	3	0	1.74425	0.16196	-0.016559	0.0911269	1.50865	0.204163	0.861273	0.210583	0.115182	0.0584034	0.14069	0.109729	95.3724	11.3502	0.404632	5	17	7.9855e-12	1.76719e-08
39812	AM863906	0	3	female gonad	1.62796	0.0647632	1.1207	0.0959986	1.45348	0.108038	1.13636	0.0174283	1.06162	0.0413516	1.31822	0.0766741	32.5832	0.931633	0.0972143	5	17	3.91481e-08	5.43376e-05
42855	AM866509	"(sp:Q6XPS3) Phosphatidylinositol-3,4,5-trisphosphate 3-phosphatase TPTE2 OS=Homo sapiens GN=TPTE2 PE=1 SV=2"	3	0	1.35489	0.0504428	0.463976	0.0733358	1.05434	0.144708	0.632286	0.0511133	0.448138	0.136004	0.484753	0.0962354	59.1857	2.77137	0.159205	5	17	3.75482e-10	7.25807e-07
40666	CU998593	(sp:Q3TXT3) SOSS complex subunit C OS=Mus musculus GN=Ssbip1 PE=2 SV=1	3	0	1.61451	0.07735	1.33832	0.047543	1.50199	0.0217437	1.34805	0.0213998	1.35457	0.0174182	1.65044	0.115609	19.2604	0.386486	0.0682256	5	17	1.83421e-06	0.00153707
26089	CU685443	0	3	0	0.137684	0.0765802	-0.37179	0.0594679	-0.0257788	0.102035	-0.400114	0.0677677	-0.410457	0.0531882	-0.237918	0.11525	28.4163	0.992228	0.11872	5	17	1.09424e-07	0.000136233
37427	AM860924	0	3	female gonad	1.44156	0.0482272	0.499975	0.0168073	1.20332	0.0716971	0.729159	0.0952405	0.513396	0.0816108	0.674	0.141654	79.8036	2.90995	0.123977	5	17	3.40108e-11	7.19668e-08
789	AM853822	0	3	0	0.36886	0.10397	-0.270024	0.0995314	-0.0291443	0.0813656	-0.0916902	0.0619283	-0.160045	0.0833266	-0.0273964	0.0575705	27.0268	0.932784	0.117345	5	17	1.58784e-07	0.00019054
29207	AM861940	0	3	0	0.889826	0.0358806	0.434329	0.1117	0.676243	0.0583776	0.309693	0.0388336	0.394017	0.0389979	0.603678	0.0957676	35.0684	0.89318	0.0865967	5	17	2.23894e-08	3.30692e-05
5201	AM858358	0	3	female gonad	0.952312	0.0316048	0.401381	0.0485585	0.68493	0.114792	0.253723	0.08203	0.290964	0.0863741	0.447198	0.0582252	49.2412	1.37413	0.0948805	5	17	1.61081e-09	2.88978e-06
37600	AM868059	0	3	0	1.57749	0.0355989	0.969214	0.041814	1.45479	0.0580881	1.14374	0.0789934	1.01502	0.102035	1.09151	0.0391826	64.353	1.19844	0.0633178	5	17	1.92429e-10	3.84089e-07
26460	AM853813	0	3	0	2.19681	0.0691745	1.91308	0.0710935	2.21274	0.0401604	2.0014	0.0545577	1.9887	0.0217755	2.07894	0.0607969	17.4064	0.28323	0.0553236	5	17	3.71105e-06	0.00269422
26765	CU993359	0	3	0	1.88751	0.0535154	1.18851	0.0623063	1.64792	0.153808	1.21525	0.044259	1.08241	0.0971684	1.25341	0.0620186	50.6377	1.89902	0.127507	5	17	1.29247e-09	2.34066e-06
9841	AM863890	0	3	0	2.00467	0.0685367	1.33979	0.0335459	1.72689	0.0900313	1.34661	0.0367821	1.20202	0.0171603	1.35958	0.0592402	105.335	1.7647	0.0569607	5	17	3.54361e-12	8.03691e-09
43763	AM861216	(sp:Q9I9M5) Frizzled-1 OS=Xenopus laevis GN=fzd1 PE=2 SV=1	3	0	1.91584	0.0504106	1.38625	0.0938337	1.77607	0.0832982	1.50011	0.0333639	1.41009	0.00989043	1.45311	0.0388564	50.342	0.931598	0.0629183	5	17	1.35351e-09	2.4485e-06
3772	AM858663	(sp:Q5VYJ5) MAM and LDL-receptor class A domain-containing protein C10orf112 OS=Homo sapiens GN=C10orf112 PE=2 SV=3	3	0	1.06966	0.126788	-0.920725	0.128006	0.747091	0.217501	-0.255296	0.176317	-0.917706	0.175303	-0.897788	0.0946214	125.938	15.5898	0.420887	5	17	8.16458e-13	1.90888e-09
33361	AM861096	hypothetical protein [Trichomonas vaginalis G3]	3	0	1.20813	0.175866	0.147674	0.334312	0.921619	0.31151	0.0894667	0.241102	-0.547331	0.287019	-0.92085	0.248472	35.2688	12.8997	1.24356	5	17	2.14363e-08	3.17687e-05
19566	AM854615	(sp:P61801) Aprataxin OS=Xenopus tropicalis GN=aptx PE=2 SV=1	3	female gonad	1.21639	0.0706081	0.854871	0.06069	0.987482	0.100305	0.587701	0.111362	0.581774	0.0742921	0.803368	0.106078	27.3696	1.11241	0.13819	5	17	1.44628e-07	0.000175868
10854	AM856223	0	3	female gonad	1.10268	0.0403951	0.276665	0.045421	0.786834	0.133402	0.390661	0.0243336	0.185426	0.0943923	0.283508	0.0787878	82.9736	2.50609	0.102692	5	17	2.48023e-11	5.30273e-08
7475	AM858733	(sp:Q689Z5) Protein strawberry notch homolog 1 OS=Mus musculus GN=Sbno1 PE=1 SV=2	3	0	1.81198	0.026172	1.28085	0.110577	1.58608	0.131799	1.07569	0.0602132	0.96182	0.0287257	1.24183	0.0940316	49.5778	1.8942	0.129902	5	17	1.52674e-09	2.74813e-06
35203	AM869101	0	3	0	1.95263	0.0159015	1.55933	0.0338197	1.6418	0.0451358	1.373	0.0270395	1.38103	0.0896605	1.51114	0.0861434	58.9524	0.881426	0.0508351	5	17	3.87484e-10	7.46682e-07
25231	AM858728	(sp:Q5ZML4) Cysteine and histidine-rich domain-containing protein 1 OS=Gallus gallus GN=CHORDC1 PE=2 SV=1	3	0	0.974479	0.0532956	0.590525	0.082734	0.759486	0.0491875	0.602022	0.0222217	0.565826	0.0248933	0.735706	0.130242	17.3288	0.458317	0.089924	5	17	3.82703e-06	0.00276311
6011	AM856183	(sp:Q68CP9) AT-rich interactive domain-containing protein 2 OS=Homo sapiens GN=ARID2 PE=1 SV=2	3	0	1.4103	0.0636292	1.20384	0.0331502	1.13563	0.0859732	0.957131	0.0452012	0.948327	0.110781	1.13658	0.0361826	26.0181	0.552648	0.072219	5	17	2.10269e-07	0.00024286
29489	AM859179	(sp:Q8CHU3) Epsin-2 OS=Mus musculus GN=Epn2 PE=1 SV=1	3	0	1.33659	0.0288396	0.692988	0.0292814	1.12379	0.0828635	0.802085	0.0271805	0.654535	0.036138	0.680548	0.023436	163.357	1.54432	0.0321425	5	17	9.49241e-14	2.29431e-10
26892	AM861833	(sp:O12947) Protein-S-isoprenylcysteine O-methyltransferase OS=Xenopus laevis GN=icmt PE=2 SV=1	3	female gonad	0.99769	0.0855034	0.44639	0.0691721	0.77167	0.119903	0.387031	0.0461192	0.296169	0.0227681	0.444563	0.057708	48.3611	1.37723	0.0968253	5	17	1.85611e-09	3.31315e-06
33225	AM861629	(sp:Q60809) CCR4-NOT transcription complex subunit 7 OS=Mus musculus GN=Cnot7 PE=1 SV=1	3	female gonad	1.19917	0.0747133	0.313716	0.0574361	1.09915	0.0830384	0.583376	0.0332601	0.390088	0.0957519	0.490374	0.0540492	120.155	2.74762	0.0777486	5	17	1.20237e-12	2.7883e-09
38134	EW777982	0	3	0	1.68412	0.0931808	1.2885	0.0381008	1.55966	0.100029	1.26538	0.0174696	1.12341	0.0190848	1.19868	0.0891523	35.9237	0.907699	0.0859091	5	17	1.86243e-08	2.78619e-05
34807	AM857764	hypothetical protein BRAFLDRAFT_75428 [Branchiostoma floridae]	3	0	0.888584	0.146245	-0.0602629	0.151865	0.853394	0.148789	0.279486	0.119539	0.286219	0.0334777	0.3624	0.257044	20.6228	2.68759	0.443091	5	17	1.1314e-06	0.00101486
13049	AM859904	0	3	female gonad	1.74378	0.0331363	1.0451	0.045181	1.52577	0.0755402	1.08943	0.0493685	0.981971	0.0890548	0.944068	0.0585258	120.901	2.13305	0.0599861	5	17	1.14264e-12	2.65321e-09
25655	AM858524	0	3	0	1.52573	0.0400342	0.789302	0.0258475	1.36099	0.0993463	1.05128	0.0404631	0.870947	0.0293146	0.810247	0.0863007	97.4197	1.87377	0.0653955	5	17	6.71418e-12	1.49391e-08
30495	CU987402	(sp:O75061) Putative tyrosine-protein phosphatase auxilin OS=Homo sapiens GN=DNAJC6 PE=1 SV=3	3	female gonad	1.49761	0.119699	1.11169	0.0197037	1.33874	0.0818504	1.09818	0.0332493	1.03644	0.0698708	1.16746	0.045103	23.7454	0.582669	0.0834297	5	17	4.10451e-07	0.000431794
22568	EE677621	(sp:Q7ZY86) Transmembrane protein 168 OS=Xenopus laevis GN=tmem168 PE=2 SV=1	3	female gonad	1.5549	0.11115	1.12265	0.0283328	1.37663	0.116721	0.951658	0.0428231	1.02218	0.0954427	1.16339	0.0128005	32.4721	0.998559	0.104555	5	17	4.01738e-08	5.55201e-05
32712	AM860111	0	3	0	1.62047	0.0770438	1.30604	0.0184531	1.49727	0.0873897	1.29185	0.00947974	1.23841	0.0433462	1.3418	0.0623392	23.8862	0.403434	0.0574255	5	17	3.93185e-07	0.000417169
21947	AM863435	(sp:P25183) Regulator of chromosome condensation OS=Xenopus laevis GN=rcc1 PE=2 SV=1	3	female gonad	1.62653	0.0211296	0.838594	0.0750298	1.44437	0.0635787	0.821301	0.0361217	0.629651	0.106256	0.844428	0.0252229	175.832	3.03869	0.058758	5	17	5.15143e-14	1.25437e-10
30172	AM859407	0	3	0	1.05234	0.015307	0.716708	0.0682276	0.776316	0.0478245	0.413911	0.039869	0.557732	0.039556	0.774682	0.0322567	96.1171	0.92015	0.0325489	5	17	7.49434e-12	1.66299e-08
6704	AM861462	(sp:Q9D328) Transmembrane protein 35 OS=Mus musculus GN=Tmem35 PE=2 SV=1	3	0	1.06925	0.0572646	0.426006	0.187703	0.769063	0.0900137	0.617629	0.0534686	0.861451	0.0482955	1.07962	0.0576318	27.3245	1.31036	0.163049	5	17	1.46409e-07	0.000177302
10016	CB617331	0	3	0	1.5743	0.0470814	1.17396	0.0123201	1.29647	0.0740225	1.09126	0.092023	1.18581	0.0288892	1.27546	0.0225599	36.4666	0.559269	0.0521441	5	17	1.6604e-08	2.51717e-05
44729	AM858975	(sp:Q32KN0) Zinc finger protein 572 OS=Bos taurus GN=ZNF572 PE=2 SV=1	3	0	1.65783	0.0364483	1.35773	0.046481	1.47577	0.0385924	1.41178	0.0179869	1.371	0.0343986	1.49887	0.0256614	39.9026	0.237627	0.0202476	5	17	8.30367e-09	1.33606e-05
25528	AM859326	0	3	0	2.25258	0.0793047	1.79949	0.0525801	2.14553	0.0656376	1.86998	0.0141665	1.79407	0.0277106	1.8086	0.0424453	56.2683	0.78824	0.0476292	5	17	5.61276e-10	1.05857e-06
35738	AM864680	(sp:Q08876) Protein suppressor of hairy wing OS=Drosophila virilis GN=su(Hw) PE=2 SV=1	3	0	1.51476	0.080206	1.03126	0.0444082	1.30337	0.0914039	1.04408	0.0855955	0.989365	0.161788	1.06604	0.0541209	21.0955	0.827669	0.133397	5	17	9.62734e-07	0.000884753
14835	AM858464	(sp:P49366) Deoxyhypusine synthase OS=Homo sapiens GN=DHPS PE=1 SV=1	3	0	0.721866	0.0944093	0.365392	0.0625803	0.423963	0.0690654	0.30131	0.035185	0.275041	0.0785146	0.306848	0.0265592	25.9481	0.541533	0.0709575	5	17	2.14484e-07	0.0002473
5153	CU996055	0	3	0	1.8343	0.0764341	1.23653	0.0682036	1.59692	0.0947653	1.39429	0.0851296	1.29404	0.0442184	1.25076	0.0424635	41.8521	1.1015	0.0894842	5	17	5.73895e-09	9.44058e-06
27364	AM863559	0	3	0	0.72406	0.113972	0.425964	0.076426	0.393636	0.0366469	0.15822	0.0426558	0.238448	0.0986086	0.423139	0.0565715	26.3756	0.737178	0.0950274	5	17	1.90146e-07	0.000220569
32989	AM865122	0	3	0	2.02253	0.0854446	1.59871	0.0290625	1.91769	0.0909986	1.5706	0.0441701	1.51287	0.0544038	1.66576	0.0585901	38.6341	0.810741	0.0713494	5	17	1.06547e-08	1.67919e-05
13277	AM860854	(sp:Q13415) Origin recognition complex subunit 1 OS=Homo sapiens GN=ORC1L PE=1 SV=2	3	0	1.90385	0.110889	1.02094	0.0464722	1.74246	0.108415	1.17433	0.0868699	0.943538	0.187373	1.18378	0.097192	51.133	3.0052	0.199825	5	17	1.19699e-09	2.17732e-06
31817	CX069100	0	3	0	1.98882	0.0623097	1.58115	0.0526334	1.90336	0.119966	1.63591	0.0404532	1.55066	0.0825032	1.63166	0.0495415	24.675	0.646049	0.0890199	5	17	3.10228e-07	0.000339079
11500	AM861960	(sp:B1WC97) BTB/POZ domain-containing protein KCTD7 OS=Rattus norvegicus GN=Kctd7 PE=2 SV=1	3	0	0.339012	0.0524021	0.0627801	0.0551993	-0.0794218	0.0605641	-0.211598	0.0636965	-0.168901	0.0240631	0.13256	0.0533861	55.8886	0.826212	0.0502629	5	17	5.92272e-10	1.11229e-06
24248	AM858989	(sp:Q9H1A3) Methyltransferase-like protein 9 OS=Homo sapiens GN=METTL9 PE=2 SV=1	3	0	0.652814	0.130032	-0.175773	0.0817627	0.218808	0.0867649	-0.0614296	0.141517	-0.137745	0.124217	-0.0213105	0.0660855	32.9445	1.91279	0.197407	5	17	3.601e-08	5.045e-05
10136	AM862155	0	3	female gonad	1.27264	0.166771	0.66572	0.052894	0.984708	0.218973	0.598137	0.131748	0.543097	0.109986	0.632023	0.0342862	16.9737	1.57492	0.315472	5	17	4.4127e-06	0.00306241
11068	FP089900	0	3	0	1.63437	0.0811002	1.38965	0.041172	1.48758	0.0805593	1.4285	0.018052	1.27064	0.0592827	1.27919	0.0567362	19.3331	0.35226	0.06195	5	17	1.78625e-06	0.00150045
31359	AM859137	0	3	0	1.30384	0.160444	0.28022	0.0964871	1.12064	0.0226081	0.479309	0.206374	0.449873	0.00673372	0.498412	0.0980948	44.0929	3.41614	0.263418	5	17	3.82492e-09	6.52914e-06
33640	CU990335	0	3	0	1.94888	0.0523679	1.73315	0.0196186	1.79573	0.0262922	1.56366	0.0445412	1.60833	0.10472	1.6616	0.0243598	31.5642	0.381743	0.0411201	5	17	4.97734e-08	6.73932e-05
12496	AM859160	0	3	female gonad	1.20928	0.0677061	0.815748	0.137482	0.925125	0.142978	0.455651	0.0746903	1.07356	0.10556	1.26885	0.0345876	34.5714	1.77326	0.174395	5	17	2.49641e-08	3.65475e-05
43408	ES789956	0	3	0	1.34078	0.0734763	0.802342	0.0395989	1.11439	0.0505286	0.94445	0.0496885	0.777497	0.142508	0.943149	0.118108	24.3044	0.846593	0.118432	5	17	3.46482e-07	0.000375933
20469	AM859169	(sp:B0BLT4) Glycolipid transfer protein OS=Xenopus tropicalis GN=gltp PE=2 SV=1	3	0	0.941005	0.0431518	0.599595	0.0812325	0.682779	0.0443026	0.530272	0.0447907	0.539776	0.0499352	0.715082	0.150463	13.9169	0.451045	0.110194	5	17	1.67618e-05	0.00871615
9319	CU986447	0	3	0	1.70935	0.131352	1.25592	0.0438881	1.54727	0.103099	1.25518	0.0414318	1.14069	0.046083	1.24677	0.0195853	30.934	0.909588	0.0999741	5	17	5.79436e-08	7.72389e-05
10878	CU990298	0	3	0	1.17471	0.0547639	0.511374	0.0470617	0.799672	0.156292	0.436785	0.091921	0.51413	0.0197551	0.510599	0.0990432	37.1368	1.5781	0.144481	5	17	1.44395e-08	2.20925e-05
11947	ES789192	0	3	0	1.60425	0.0353173	1.02674	0.064504	1.36333	0.0570448	1.04787	0.05254	0.955286	0.119538	0.87382	0.00809348	82.4317	1.52846	0.0630433	5	17	2.61561e-11	5.58432e-08
6330	AM868402	(sp:P97302) Transcription regulator protein BACH1 OS=Mus musculus GN=Bach1 PE=1 SV=1	3	0	0.710767	0.124591	0.371532	0.106426	0.402557	0.0732771	0.0935707	0.0748614	0.265681	0.0242797	0.523035	0.0433454	24.8698	0.879844	0.120285	5	17	2.92884e-07	0.000323344
33543	AM857416	conserved hypothetical protein [Culex quinquefasciatus]	3	0	0.728816	0.0636862	-0.234704	0.0789055	0.463471	0.0936993	-0.0950489	0.0875628	-0.280804	0.0905013	-0.116414	0.108726	85.7951	3.33165	0.132031	5	17	1.89053e-11	4.07599e-08
16322	AM859344	0	3	0	0.795531	0.249798	-0.616018	0.0874141	0.554804	0.193458	0.0187884	0.0822075	-0.72164	0.0301689	-0.69104	0.134234	73.3211	8.59475	0.39855	5	17	6.74461e-11	1.39546e-07
34131	AM859533	0	3	0	1.31186	0.0373414	0.695372	0.0344715	1.09344	0.104076	0.77617	0.0374049	0.615659	0.0401576	0.626581	0.0385668	102.27	1.56798	0.0521282	5	17	4.51306e-12	1.01769e-08
28258	AM859569	0	3	0	0.50723	0.253626	-0.968025	0.218421	0.261419	0.250336	-0.633109	0.233411	-1.29772	0.0444908	-1.67449	0.83715	17.6404	14.4961	2.79397	5	17	3.38407e-06	0.00250083
29510	AM859765	0	3	female gonad	0.957686	0.140906	0.0952493	0.0730495	0.78934	0.121067	0.317544	0.0483915	-0.075584	0.105745	-0.0574796	0.104971	69.4939	3.71977	0.18199	5	17	1.03858e-10	2.10832e-07
6731	AM859956	0	3	0	0.831012	0.126631	0.392604	0.0485899	0.494177	0.151601	0.285098	0.0552678	0.301084	0.0926474	0.553568	0.112677	14.3077	0.793479	0.188557	5	17	1.39631e-05	0.00754007
38974	AM860033	0	3	0	1.1346	0.0882928	0.504366	0.039009	0.717261	0.0753931	0.431624	0.0461593	0.331197	0.0380866	0.425669	0.0480261	93.6639	1.68642	0.0612171	5	17	9.25449e-12	2.03414e-08
8005	AM860035	(sp:Q3UR70) Transforming growth factor-beta receptor-associated protein 1 OS=Mus musculus GN=Tgfbrap1 PE=2 SV=1	3	0	0.53661	0.0814021	0.237272	0.0592546	0.165214	0.147006	0.163894	0.0416287	0.0474576	0.0276328	0.11007	0.0708807	16.3903	0.564224	0.117042	5	17	5.6049e-06	0.00366561
42010	AM860225	0	3	0	1.34197	0.0492978	0.723337	0.12625	1.13661	0.0636446	0.638904	0.0315287	0.809953	0.0723736	0.914737	0.127013	36.9563	1.40342	0.129115	5	17	1.49897e-08	2.28892e-05
3751	AM860339	0	3	0	1.09943	0.0815748	0.7526	0.0866335	0.786872	0.122966	0.535307	0.0370549	0.656087	0.0980477	0.846966	0.0946481	17.5904	0.714283	0.138062	5	17	3.45114e-06	0.00254004
24238	AM860446	0	3	female gonad	1.18725	0.0801342	0.299447	0.153106	0.701377	0.134886	0.550305	0.0715703	0.36739	0.0625366	0.466041	0.0572408	38.8616	2.02526	0.17719	5	17	1.01834e-08	1.61e-05
40413	AM860468	0	3	female gonad	0.731411	0.0510372	0.318168	0.0302028	0.449683	0.0494698	0.131958	0.0682421	0.247243	0.102336	0.507581	0.0627351	46.2657	0.879268	0.0646162	5	17	2.62687e-09	4.61541e-06
37809	AJ565672	(sp:Q8MJK1) Protein chibby homolog 1 OS=Bos taurus GN=CBY1 PE=2 SV=1	3	0	1.68262	0.0530316	1.32123	0.0610791	1.4477	0.163531	1.08574	0.0618577	1.40673	0.0946835	1.43865	0.049532	18.7712	0.754302	0.136626	5	17	2.19676e-06	0.00175961
35140	AM860667	(sp:Q5BKU9) Uncharacterized protein C17orf90 OS=Homo sapiens GN=C17orf90 PE=2 SV=1	3	0	1.23634	0.0555405	0.768724	0.0810704	0.60687	0.227788	0.237994	0.173308	0.657239	0.184877	0.717101	0.16066	16.686	2.06383	0.420535	5	17	4.96098e-06	0.00332385
18758	AM860670	0	3	female gonad	1.38855	0.036562	0.737959	0.00985666	1.09409	0.0502831	0.775829	0.0502229	0.694117	0.0311706	0.754156	0.029877	208.721	1.47793	0.0240751	5	17	1.23235e-14	3.02295e-11
6851	AM860878	0	3	female gonad	1.20553	0.125869	0.279384	0.144367	1.11904	0.186293	0.441027	0.108021	0.200796	0.142134	0.221811	0.0681296	45.9973	4.10599	0.303504	5	17	2.74923e-09	4.8084e-06
37687	AM860896	0	3	female gonad	1.95605	0.0333951	1.01442	0.0381847	1.72939	0.104964	1.22345	0.0700257	1.0259	0.118607	1.03781	0.0304144	128.443	3.26372	0.0863934	5	17	6.94e-13	1.62812e-09
25162	AM861119	(sp:Q8C8R3) Ankyrin-2 OS=Mus musculus GN=Ank2 PE=1 SV=2	3	0	0.110193	0.104515	-0.63959	0.0891441	-0.0988552	0.0854025	-0.220892	0.122529	-0.332949	0.0697151	-0.279181	0.0682262	28.6945	1.24244	0.147216	5	17	1.0176e-07	0.000127708
20806	AM861173	(sp:O43639) Cytoplasmic protein NCK2 OS=Homo sapiens GN=NCK2 PE=1 SV=2	3	0	1.29143	0.094389	1.03964	0.0593898	1.04579	0.0716183	0.839783	0.0647285	0.904992	0.032441	1.10198	0.0254359	23.7022	0.48319	0.069312	5	17	4.15925e-07	0.000437137
35379	AM861678	(sp:Q91W53) Golgin subfamily A member 7 OS=Mus musculus GN=Golga7 PE=2 SV=1	3	0	0.676564	0.052975	0.126266	0.0274244	0.517212	0.0974859	0.262874	0.0870613	0.194189	0.149278	0.292265	0.0785257	23.261	0.855125	0.124992	5	17	4.767e-07	0.000491001
32985	AM861855	(sp:Q7ZTY7) Vesicle transport protein USE1 OS=Danio rerio GN=use1 PE=2 SV=1	3	0	1.33101	0.0837248	0.365182	0.14548	1.11668	0.0833517	0.57706	0.0593765	0.341255	0.0674751	0.481272	0.0282887	89.8032	3.36627	0.127449	5	17	1.30409e-11	2.83509e-08
19703	AM861911	0	3	0	0.994019	0.120631	-0.568011	0.067744	0.84412	0.15917	0.0156902	0.143673	-0.499785	0.0683555	-0.413362	0.0936891	137.667	9.35454	0.231033	5	17	3.91576e-13	9.27643e-10
30299	AM862033	(sp:Q8CG85) MAM domain-containing protein 2 OS=Mus musculus GN=Mamdc2 PE=1 SV=1	3	0	2.15594	0.093381	0.193193	0.12743	1.89346	0.176957	0.88623	0.193829	0.085094	0.176365	-0.1115	0.132807	157.165	18.3351	0.396648	5	17	1.30784e-13	3.14536e-10
14630	AM862117	0	3	0	1.17835	0.147971	-1.44394	0.107765	0.856577	0.191127	-0.0451551	0.179392	-1.14645	0.124138	-0.961823	0.262874	145.714	23.3481	0.544788	5	17	2.44804e-13	5.84348e-10
38283	AM862358	0	3	female gonad	1.27545	0.0207161	0.527941	0.0366266	0.909097	0.0455363	0.477391	0.0489932	0.253699	0.072998	0.550806	0.0490582	231.845	2.49651	0.0366112	5	17	5.10703e-15	1.25786e-11
38301	AM862477	0	3	0	1.07878	0.0753327	0.75649	0.0121427	0.959073	0.0421407	0.715627	0.0736146	0.747693	0.0469817	0.81356	0.109394	17.1722	0.400859	0.0793681	5	17	4.07396e-06	0.00289251
43031	AM862632	0	3	0	0.768293	0.0840498	0.228738	0.03614	0.500306	0.119772	0.304184	0.0666397	0.462162	0.0417027	0.594654	0.0333134	29.4104	0.763609	0.0882774	5	17	8.46491e-08	0.000108605
31126	AM862650	(sp:Q6V7V2) Rhotekin OS=Rattus norvegicus GN=Rtkn PE=2 SV=1	3	female gonad	0.438873	0.123445	-0.442231	0.10703	0.24034	0.0788116	-0.380608	0.086107	-0.633143	0.0558992	-0.318502	0.0320398	87.7044	3.36086	0.130289	5	17	1.5808e-11	3.42402e-08
20250	AM862870	0	3	female gonad	1.18297	0.0977061	0.628225	0.138102	0.978318	0.122538	0.494613	0.0651262	0.483278	0.0323163	0.682704	0.0680678	32.1631	1.50992	0.159615	5	17	4.31865e-08	5.92519e-05
15952	AM863103	0	3	0	1.32206	0.0453328	0.980102	0.0806082	1.21539	0.0362613	1.00281	0.0894272	1.02969	0.0639723	1.0922	0.0882353	14.3119	0.35837	0.0851359	5	17	1.39362e-05	0.00753947
19129	AM863122	0	3	female gonad	0.639639	0.0885684	0.0922723	0.046967	0.217035	0.0896834	-0.183842	0.090146	-0.227062	0.0684239	-0.0526138	0.0708239	64.5047	1.95546	0.103071	5	17	1.88834e-10	3.77479e-07
10979	AM863151	0	3	female gonad	1.83678	0.0606032	0.99747	0.0489456	1.53943	0.100135	1.02644	0.072607	0.915704	0.111075	1.08367	0.0576329	89.9751	2.61302	0.0987413	5	17	1.28394e-11	2.79514e-08
21446	AM863376	0	3	0	1.04144	0.0350643	0.483725	0.0619911	0.735637	0.0774576	0.490448	0.0557935	0.3925	0.0631335	0.38098	0.0360982	79.6862	1.27582	0.0544359	5	17	3.44184e-11	7.27948e-08
65	AM863520	(sp:Q5R416) Catenin alpha-2 OS=Pongo abelii GN=CTNNA2 PE=2 SV=3	3	0	1.57427	0.0629423	1.16934	0.0242892	1.43423	0.0734523	1.22812	0.0552517	1.1917	0.0208552	1.29233	0.0538773	34.1433	0.48782	0.0485772	5	17	2.74489e-08	3.97186e-05
24268	AM863643	0	3	0	0.356197	0.0736063	-0.234633	0.0492067	-0.0574003	0.159307	-0.320218	0.0555354	-0.236917	0.182098	-0.239804	0.0956435	20.6997	1.23388	0.202668	5	17	1.10183e-06	0.000991646
2804	AM863846	0	3	female gonad	0.187209	0.0862014	-0.67195	0.0935228	-0.10788	0.0702365	-0.359492	0.133388	-0.485295	0.124805	-0.690282	0.238335	24.804	2.32189	0.318272	5	17	2.98621e-07	0.000328484
40613	AM864133	(sp:Q9UBB5) Methyl-CpG-binding domain protein 2 OS=Homo sapiens GN=MBD2 PE=1 SV=1	3	0	1.63142	0.0828879	1.15713	0.0557006	1.53887	0.0699224	1.31351	0.0219083	1.22416	0.0388132	1.36731	0.0463465	39.4416	0.643632	0.0554832	5	17	9.08348e-09	1.45154e-05
33075	AM864316	0	3	0	1.52565	0.0542855	0.993755	0.0631376	1.37498	0.0426278	1.21267	0.0790972	1.087	0.0399856	1.101	0.058336	45.6451	0.784387	0.0584273	5	17	2.91957e-09	5.09172e-06
32333	AM864465	0	3	female gonad	1.44798	0.0426035	0.815372	0.0298258	1.24655	0.0998776	0.829481	0.038006	0.833974	0.086043	0.815479	0.0620917	75.0168	1.51681	0.0687468	5	17	5.60834e-11	1.17046e-07
32515	AM864621	0	3	0	2.00895	0.0561241	1.2728	0.095256	1.8693	0.0520616	1.39834	0.0242186	1.31996	0.036797	1.44034	0.0334101	119.761	1.85343	0.0526184	5	17	1.23523e-12	2.8608e-09
41267	AM864763	0	3	0	2.19002	0.0573653	1.50646	0.0358656	2.04758	0.105015	1.41576	0.0535493	1.39798	0.0504507	1.68223	0.071656	97.7438	2.18235	0.0759127	5	17	6.53444e-12	1.45587e-08
20604	AM865149	0	3	female gonad	2.26048	0.0215319	1.61668	0.110179	2.06199	0.103961	1.49394	0.0842253	1.51524	0.113374	1.65153	0.119064	41.5382	1.95169	0.15975	5	17	6.08416e-09	9.95977e-06
37662	AM865234	0	3	female gonad	1.96759	0.0567611	1.39332	0.0557435	1.86864	0.0870752	1.2787	0.0520135	1.34193	0.0294476	1.62576	0.0454339	94.9177	1.61296	0.057777	5	17	8.30314e-12	1.83416e-08
31393	AM865251	(sp:Q2THX0) Probable palmitoyltransferase ZDHHC8 OS=Pan troglodytes GN=ZDHHC8 PE=2 SV=1	3	female gonad	0.685695	0.0929055	-0.088221	0.0826463	0.378586	0.095674	-0.130826	0.0201495	-0.112959	0.0666587	0.0478018	0.070907	73.693	2.14651	0.0990342	5	17	6.47489e-11	1.34354e-07
42817	AM865393	(sp:B4HQ29) F-box/SPRY domain-containing protein 1 OS=Drosophila sechellia GN=Fsn PE=3 SV=1	3	0	0.752941	0.10301	0.291202	0.0452666	0.689212	0.0782576	0.410628	0.0254446	0.314924	0.043573	0.406755	0.100238	27.1895	0.737601	0.0922358	5	17	1.51882e-07	0.000183322
12818	AM865563	(sp:Q6VFT6) Forkhead box protein L2 OS=Sus scrofa GN=FOXL2 PE=4 SV=1	3	0	0.845614	0.182793	-0.826123	0.111854	0.60729	0.179271	-0.328804	0.177867	-1.33294	0.0733543	-1.56683	0.117321	170.09	19.0678	0.381152	5	17	6.78346e-14	1.64838e-10
26278	AM865727	0	3	0	1.39144	0.0525948	0.755982	0.0964346	1.1477	0.114797	0.533201	0.143118	0.787276	0.107304	0.874681	0.0568273	37.2929	1.86352	0.169897	5	17	1.3982e-08	2.15323e-05
1948	AM865775	(sp:Q9NWS1) UPF0419 protein C12orf48 OS=Homo sapiens GN=C12orf48 PE=2 SV=2	3	0	1.0719	0.225769	0.36945	0.111512	1.00779	0.118648	0.450519	0.0879328	0.397082	0.0731866	0.601818	0.0896481	22.2	1.89661	0.290471	5	17	6.67832e-07	0.000658482
18708	AM865888	0	3	0	0.193811	0.14804	-0.338179	0.0915579	-0.180928	0.0931045	-0.45522	0.0906287	-0.427084	0.01722	-0.199043	0.131668	19.2255	1.0978	0.194145	5	17	1.85769e-06	0.00154746
16441	AM865969	(sp:O61366) Serine-enriched protein OS=Drosophila melanogaster GN=gprs PE=4 SV=3	3	0	0.56023	0.0980881	-1.13459	0.0837741	0.280339	0.158019	-0.648173	0.159665	-0.99631	0.108141	-0.97165	0.188782	104.864	10.2277	0.331611	5	17	3.67628e-12	8.33413e-09
11204	AM866052	hypothetical protein TRIADDRAFT_56859 [Trichoplax adhaerens]	3	female gonad	0.404774	0.045332	0.045441	0.0426064	0.0259419	0.070358	-0.165173	0.0508696	-0.257967	0.010079	0.0114491	0.0836292	59.155	0.964044	0.0554095	5	17	3.77039e-10	7.28439e-07
5921	AM866109	0	3	female gonad	0.88706	0.0864265	0.499804	0.0569111	0.529328	0.175535	0.11104	0.104195	0.263603	0.203206	0.431709	0.0163122	19.2394	1.361	0.240516	5	17	1.84829e-06	0.00154332
10534	AM866238	(sp:Q80Z37) E3 ubiquitin-protein ligase Topors OS=Mus musculus GN=Topors PE=1 SV=1	3	female gonad	0.199854	0.0253431	-0.168136	0.0193399	-0.153564	0.0981742	-0.43554	0.0453297	-0.455921	0.0756757	-0.247228	0.104278	44.6507	1.07954	0.082203	5	17	3.46767e-09	5.96785e-06
37644	AM866253	(sp:Q9UBD5) Origin recognition complex subunit 3 OS=Homo sapiens GN=ORC3L PE=1 SV=1	3	0	0.212562	0.0563396	-0.143589	0.0668679	0.0666384	0.0351485	-0.0403728	0.031286	-0.0330969	0.103965	0.0188044	0.0475948	16.8057	0.286647	0.0579923	5	17	4.72409e-06	0.00323128
1667	AM866463	0	3	female gonad	1.30385	0.114065	-0.398034	0.0834683	0.936048	0.143918	0.0632399	0.160121	-0.302745	0.214864	-0.301864	0.293844	63.4871	10.2766	0.550353	5	17	2.14465e-10	4.25285e-07
16828	AM866611	0	3	0	0.976375	0.0316095	0.613624	0.047487	0.520482	0.0243578	0.39034	0.0800148	0.457359	0.0696803	0.468152	0.0539548	61.2234	0.885823	0.0491935	5	17	2.86657e-10	5.62134e-07
39267	AM866851	0	3	0	1.77094	0.0510367	1.50139	0.036826	1.63878	0.050303	1.45419	0.0522672	1.42942	0.0889814	1.47927	0.0399039	23.7019	0.33658	0.0482818	5	17	4.15958e-07	0.000436756
32249	AM866866	0	3	female gonad	1.47409	0.101867	0.945481	0.066124	1.28047	0.0264883	0.898313	0.0572354	1.03821	0.0262449	1.20426	0.0732243	44.2071	0.957519	0.0736435	5	17	3.74859e-09	6.40634e-06
14442	AM866984	0	3	0	1.13211	0.0587268	0.406712	0.0675004	0.892053	0.114771	0.554571	0.0507238	0.32948	0.101966	0.154403	0.0654549	85.648	2.64245	0.104898	5	17	1.91708e-11	4.12939e-08
18128	AM866993	0	3	0	1.08008	0.150138	0.435146	0.106807	0.782279	0.0225382	0.471218	0.13258	0.561818	0.0452194	0.506564	0.0685	23.9357	1.22684	0.17427	5	17	3.87305e-07	0.000412867
34178	AM867229	(sp:A6NNP5) UPF0594 protein C13orf38 OS=Homo sapiens GN=C13orf38 PE=3 SV=3	3	0	0.692042	0.147126	-0.602735	0.167346	0.506074	0.264445	-0.057068	0.159447	-0.325893	0.183594	-0.286843	0.0640736	33.3828	5.05402	0.514746	5	17	3.25751e-08	4.61263e-05
23959	AM867237	conserved hypothetical protein [Pediculus humanus corporis]	3	female gonad	0.169401	0.0647251	-0.415458	0.0944725	0.312168	0.0660551	0.14427	0.12667	0.00545849	0.0778455	-0.325545	0.0848745	42.8781	1.69369	0.1343	5	17	4.75449e-09	7.96852e-06
6329	AM867260	(sp:B4F7A7) Centrosomal protein of 57 kDa OS=Rattus norvegicus GN=Cep57 PE=1 SV=2	3	female gonad	1.25109	0.152861	0.850355	0.127103	0.963553	0.153329	0.422406	0.108776	0.95643	0.116018	1.2303	0.022314	24.5973	1.83036	0.253004	5	17	3.17465e-07	0.000346036
35884	AM867308	(sp:Q5ZKN1) Cell division protein kinase 9 OS=Gallus gallus GN=CDK9 PE=2 SV=1	3	0	1.11647	0.0699293	0.719953	0.0383062	0.980433	0.0498391	0.933333	0.046625	0.962491	0.100736	0.935147	0.0313957	19.7229	0.326579	0.0562985	5	17	1.55196e-06	0.00133623
4885	AM867657	(sp:Q9NXV2) BTB/POZ domain-containing protein KCTD5 OS=Homo sapiens GN=KCTD5 PE=1 SV=1	3	female gonad	0.958657	0.0661297	0.658465	0.0725203	0.635206	0.0852177	0.327018	0.0321708	0.315709	0.0712335	0.563029	0.105044	37.6894	1.07569	0.0970389	5	17	1.2891e-08	1.9981e-05
20411	AM867751	0	3	0	1.04273	0.0536126	0.678892	0.0757695	0.775999	0.0454831	0.548526	0.165347	0.558584	0.134482	0.849731	0.035792	14.9552	0.677756	0.154085	5	17	1.04029e-05	0.00600246
14655	AM867830	0	3	0	0.357994	0.106397	0.122192	0.0684299	0.148271	0.07603	-0.075321	0.0725349	-0.0317169	0.0202136	0.162126	0.0464188	17.6327	0.458534	0.0884159	5	17	3.3943e-06	0.00250499
1758	AM868009	(sp:Q8VBV4) F-box/WD repeat-containing protein 7 OS=Mus musculus GN=Fbxw7 PE=1 SV=1	3	0	0.48471	0.101329	0.0601102	0.0396638	0.1696	0.0564624	0.0455701	0.0578831	0.0186479	0.0766954	0.0608983	0.0626513	26.2998	0.608588	0.0786774	5	17	1.94227e-07	0.000225109
952	AM868156	(sp:Q5R633) Zinc finger and BTB domain-containing protein 48 OS=Pongo abelii GN=ZBTB48 PE=2 SV=1	3	0	0.349074	0.0392215	0.0699797	0.0988227	-0.0666005	0.0784606	-0.1172	0.0404588	-0.0570984	0.0684858	0.102354	0.0441643	26.7655	0.570922	0.0725238	5	17	1.70615e-07	0.000202861
21639	AM868210	0	3	0	2.3927	0.0498182	1.91503	0.0407339	2.26561	0.111768	1.83403	0.0675293	1.88507	0.0131343	2.00438	0.0796268	41.1576	1.00408	0.0829464	5	17	6.53419e-09	1.06573e-05
27794	AM868521	0	3	0	1.40971	0.112934	1.1371	0.0929956	1.01292	0.123951	0.77287	0.0993745	1.01148	0.126411	1.15834	0.0773714	15.7737	0.880747	0.189843	5	17	7.27105e-06	0.00450078
40602	AM868708	0	3	0	0.549384	0.0426849	0.0169587	0.0914136	0.381433	0.0943989	0.156358	0.0349124	0.0827045	0.0616213	0.138214	0.0618893	34.0613	0.80155	0.0800107	5	17	2.79557e-08	4.0396e-05
30927	AM868779	(sp:A3KG59) Peptidase M20 domain-containing protein 2 OS=Mus musculus GN=Pm20d2 PE=2 SV=1	3	0	0.78569	0.0938314	0.0997667	0.0870782	0.231611	0.0829043	-0.153359	0.060993	0.00777751	0.0224759	0.350103	0.194579	36.4583	2.09672	0.195534	5	17	1.66329e-08	2.51821e-05
12094	AM868958	0	3	0	1.50657	0.0981038	1.21068	0.0184808	1.17934	0.0284191	1.0561	0.0734585	1.04008	0.0492974	1.10354	0.140444	17.2823	0.57206	0.112543	5	17	3.89853e-06	0.00279524
25989	AM869140	0	3	0	1.57423	0.132614	1.14221	0.0880076	1.45583	0.131666	1.04094	0.0569898	1.25332	0.111727	1.32883	0.0774778	14.5959	0.775823	0.180722	5	17	1.22334e-05	0.00682623
22243	AM869157	0	3	0	1.49914	0.105857	0.694573	0.167098	1.22111	0.140764	0.618724	0.11834	0.527703	0.0695233	0.676413	0.08063	40.3877	2.94605	0.24801	5	17	7.56302e-09	1.22445e-05
25551	AM853992	0	3	0	0.904205	0.0205572	0.407674	0.039282	0.674608	0.0619737	0.438754	0.0521314	0.342903	0.0654396	0.35306	0.15657	30.5354	0.967069	0.10768	5	17	6.38813e-08	8.44511e-05
24234	AM869240	0	3	0	1.59056	0.089913	1.17661	0.0905144	1.1624	0.0996618	0.749157	0.09462	0.995533	0.0534179	1.15948	0.0744339	39.7399	1.49394	0.127816	5	17	8.57002e-09	1.37206e-05
29217	AM869301	(sp:Q96KN7) X-linked retinitis pigmentosa GTPase regulator-interacting protein 1 OS=Homo sapiens GN=RPGRIP1 PE=1 SV=1	3	0	1.56991	0.0740123	1.21085	0.0302867	1.38402	0.0882456	0.984259	0.0147678	1.10564	0.0872755	1.3106	0.0467203	43.9431	0.83988	0.0649838	5	17	3.92775e-09	6.68504e-06
31886	AM854024	0	3	0	0.578421	0.0975462	0.438704	0.0615485	0.28442	0.0104862	0.193407	0.0581887	0.54379	0.0907725	0.661184	0.133022	18.2498	0.643905	0.119962	5	17	2.67383e-06	0.00207757
43418	BQ426356	0	3	0	1.47515	0.1274	1.1113	0.131892	1.20792	0.0885982	0.979597	0.0235784	1.0108	0.0748591	1.20732	0.0771345	13.554	0.618511	0.155153	5	17	1.99311e-05	0.00990575
1469	BQ426411	0	3	0	2.49567	0.0651169	2.16662	0.0193245	2.32502	0.110488	2.10993	0.0854261	2.24489	0.0436217	2.32069	0.0372277	15.7281	0.371553	0.08032	5	17	7.41492e-06	0.00456018
11178	CU682294	0	3	0	1.06974	0.132531	0.721753	0.0441058	0.785187	0.0995026	0.604313	0.0480535	0.629428	0.0492782	0.674491	0.0416568	18.3615	0.568242	0.105222	5	17	2.56264e-06	0.00200655
3435	CU683559	(sp:Q8IY18) Structural maintenance of chromosomes protein 5 OS=Homo sapiens GN=SMC5 PE=1 SV=2	3	female gonad	0.285595	0.0740942	-0.0919346	0.0508374	0.0761097	0.0809785	-0.172774	0.04474	-0.205785	0.0264712	0.0332237	0.039664	38.4593	0.633694	0.0560218	5	17	1.10335e-08	1.73447e-05
36559	CU685529	0	3	0	0.5513	0.0652334	0.0189537	0.0587558	0.198359	0.0502498	0.0239191	0.0488382	0.00672973	0.0276811	0.161203	0.11593	35.893	0.84143	0.0797054	5	17	1.87468e-08	2.7989e-05
18189	CU686088	0	3	female gonad	1.837	0.0783316	1.37135	0.110829	1.6837	0.0636367	1.36285	0.0395217	1.3722	0.094436	1.53361	0.0239781	28.1343	0.758408	0.0916527	5	17	1.17859e-07	0.000146145
5133	CU984254	0	3	0	-0.208089	0.0281913	-0.517574	0.0350973	-0.140142	0.0973167	-0.161138	0.0576415	-0.190075	0.0646857	-0.39676	0.0313709	27.9574	0.458664	0.0557799	5	17	1.23521e-07	0.000152302
37472	CU986324	(sp:Q7SZ59) Ras-like protein family member 12 OS=Danio rerio GN=RASL12 PE=2 SV=1	4	female gonad	1.60691	0.177327	0.633608	0.058321	1.42338	0.351697	0.41872	0.196935	0.34708	0.173961	0.400895	0.0788123	30.8489	6.08923	0.671121	5	17	5.91572e-08	7.8679e-05
37412	CU987512	0	4	0	2.49183	0.0632364	0.497372	0.0775569	2.2596	0.310529	1.13159	0.351391	0.869348	0.288101	0.333095	0.135929	60.9826	16.3431	0.911188	5	17	2.95817e-10	5.79209e-07
39536	CU987950	0	4	female gonad	1.98146	0.148714	-0.281649	0.0702129	1.69057	0.342289	0.438587	0.397875	0.0743618	0.375578	-0.293927	0.106763	54.4959	19.6161	1.22385	5	17	7.23474e-10	1.34856e-06
4685	CU987956	(sp:P91753) Mitotic apparatus protein p62 OS=Lytechinus pictus PE=2 SV=1	4	0	2.49761	0.0666204	1.01112	0.175123	2.4458	0.0935712	2.0498	0.0832823	1.77204	0.149902	0.79219	0.299836	75.5932	10.3838	0.46704	5	17	5.27222e-11	1.10295e-07
32963	CU988313	0	4	0	1.10039	0.0977019	0.217022	0.17998	0.62834	0.092244	0.236858	0.0973898	0.0625869	0.100444	0.142641	0.111362	43.2061	3.014	0.237179	5	17	4.48083e-09	7.5278e-06
34128	CU988662	(sp:P60323) Nanos homolog 3 OS=Homo sapiens GN=NANOS3 PE=2 SV=1	4	0	1.90086	0.0986562	-0.609818	0.127444	1.76365	0.110994	0.882294	0.163895	-0.164743	0.169959	-0.717568	0.161331	276.761	26.9698	0.331323	5	17	1.22125e-15	3.02258e-12
36011	CU989082	0	4	female gonad	2.32259	0.0677561	0.242742	0.0537859	2.05135	0.324799	0.9164	0.406271	0.511705	0.303191	0.112779	0.0392832	58.3507	17.5495	1.02258	5	17	4.20457e-10	8.05596e-07
8327	CU989217	(sp:Q499P8) UPF0420 protein C16orf58 homolog OS=Rattus norvegicus PE=2 SV=1	4	female gonad	1.40924	0.103587	-0.158757	0.0751567	1.0246	0.37667	0.0457306	0.191082	-0.0839091	0.151214	-0.0944465	0.128228	45.3071	9.05309	0.679375	5	17	3.09417e-09	5.37147e-06
24345	CU989281	0	4	0	1.73175	0.0458343	1.52087	0.0184504	1.53283	0.0813211	1.32845	0.0578044	1.35858	0.121555	1.58784	0.0887577	15.9182	0.423106	0.0903719	5	17	6.83596e-06	0.00431349
17317	CU989296	(sp:Q9M2Z4) Membrane steroid-binding protein 2 OS=Arabidopsis thaliana GN=MSBP2 PE=1 SV=1	4	female gonad	1.38416	0.201497	-0.0170538	0.0365096	1.19616	0.374725	0.132501	0.210387	0.0712215	0.183263	0.101694	0.0995529	34.4086	7.86085	0.77675	5	17	2.58782e-08	3.76269e-05
27858	CU989426	0	4	0	2.26559	0.0392835	2.00563	0.0370844	2.12766	0.0320479	1.94275	0.0289815	2.00737	0.0159892	2.11221	0.0573619	36.325	0.264305	0.0247388	5	17	1.71064e-08	2.57964e-05
15696	CU989553	0	4	0	1.17266	0.080053	0.849812	0.0364555	0.821462	0.0648573	0.894134	0.063297	0.860845	0.048986	0.794792	0.0472935	21.8291	0.381115	0.0593606	5	17	7.53779e-07	0.000730412
15235	CU990029	0	4	0	2.15265	0.0791289	1.80895	0.0769436	2.0227	0.0475627	1.89336	0.0561461	1.85631	0.0633777	1.87518	0.0339044	17.1078	0.323393	0.0642709	5	17	4.18044e-06	0.00293885
2520	CU990395	(sp:Q9UHN6) Transmembrane protein 2 OS=Homo sapiens GN=TMEM2 PE=1 SV=1	4	0	1.7401	0.132295	0.18436	0.332294	1.25185	0.305345	0.26213	0.228224	-0.0090492	0.202762	-0.162869	0.297979	33.3632	11.4644	1.16833	5	17	3.27208e-08	4.62999e-05
20204	CU990610	(sp:Q9HBW1) Leucine-rich repeat-containing protein 4 OS=Homo sapiens GN=LRRC4 PE=1 SV=2	4	female gonad	1.62518	0.108392	0.540841	0.0838415	1.4033	0.328731	0.596646	0.0786075	0.574249	0.118826	0.611811	0.0487895	36.3965	4.65066	0.434444	5	17	1.68506e-08	2.54949e-05
14970	CU990625	(sp:B7QIN3) UPF0608 protein ISCW013552 OS=Ixodes scapularis GN=ISCW013552 PE=3 SV=1	4	female gonad	1.49936	0.204497	0.703729	0.0456309	1.28315	0.330153	0.56023	0.042266	0.542606	0.12589	0.723862	0.0410049	21.3671	3.1473	0.500807	5	17	8.78623e-07	0.000828542
15873	CU990685	0	4	0	1.55143	0.0526583	1.03915	0.0482294	1.17556	0.0908807	1.03197	0.0736407	1.07824	0.0704524	1.11715	0.0212047	38.3736	0.76318	0.0676197	5	17	1.12246e-08	1.76226e-05
6254	CU991090	(sp:Q1JQ19) DEP domain-containing protein 7 OS=Danio rerio GN=depdc7 PE=2 SV=1	4	female gonad	1.89343	0.171501	-0.00619154	0.0527457	1.51009	0.370379	0.451905	0.303497	0.201124	0.225134	0.142482	0.126622	45.6651	12.5435	0.933927	5	17	2.90955e-09	5.07717e-06
20423	CU991121	0	4	female gonad	2.07808	0.0733942	-0.237618	0.0683606	1.7246	0.353102	0.474631	0.502845	0.0817777	0.403563	-0.387545	0.0702759	48.2307	21.3254	1.50332	5	17	1.8959e-09	3.38228e-06
21407	CU991962	0	4	0	0.834225	0.130798	0.0663616	0.144431	0.996623	0.0632468	0.930864	0.0726932	0.903112	0.274851	-0.110509	0.155499	43.9065	4.71846	0.365384	5	17	3.95336e-09	6.72467e-06
7130	CU992468	(sp:P18102) Protein tailless OS=Drosophila melanogaster GN=tll PE=1 SV=1	4	female gonad	0.830732	0.159764	-0.528123	0.150264	0.185089	0.220683	-0.147425	0.15715	-0.33745	0.166892	-0.921234	0.44557	24.6094	7.35247	1.01581	5	17	3.16322e-07	0.000345424
21866	CU993231	0	4	female gonad	0.591503	0.187533	-0.176544	0.0455312	0.470671	0.353834	-0.238535	0.0369779	-0.270313	0.0661583	-0.122518	0.0935519	18.3752	2.84509	0.526433	5	17	2.54935e-06	0.00199869
19736	CU993910	0	4	female gonad	1.94712	0.0882536	-0.0634018	0.020797	1.53665	0.351618	0.380257	0.402969	0.0387776	0.297889	-0.0663607	0.0591898	48.8212	15.3745	1.07071	5	17	1.72304e-09	3.08423e-06
4060	AM855485	0	4	0	1.68472	0.168052	0.707812	0.134294	1.03552	0.110185	0.973412	0.10619	0.815398	0.0413668	0.532427	0.00944573	50.6935	3.17238	0.212771	5	17	1.28131e-09	2.32174e-06
41624	AM855747	(sp:Q5R4R4) Protein LSM14 homolog A OS=Pongo abelii GN=LSM14A PE=2 SV=1	4	0	1.79825	0.0499209	1.47468	0.0764249	1.6626	0.0744383	1.43645	0.0405215	1.46647	0.0703767	1.58675	0.0504078	20.3223	0.382994	0.0640763	5	17	1.25569e-06	0.00110752
41022	AM855907	0	4	0	1.77362	0.059984	1.24089	0.0297237	1.80328	0.084753	1.59071	0.0597084	1.49655	0.152664	1.31883	0.107256	28.5549	1.06504	0.126813	5	17	1.05527e-07	0.000131803
9762	CU998383	0	4	female gonad	1.05307	0.138116	-0.426781	0.0975614	0.735036	0.409241	-0.165829	0.107646	-0.238545	0.158335	-0.411401	0.133093	37.5851	8.02841	0.726261	5	17	1.31684e-08	2.03847e-05
43588	CU998635	0	4	0	1.40661	0.0964677	1.07313	0.0671267	1.40242	0.0205308	1.19116	0.020796	1.15374	0.0172804	1.2459	0.0389854	24.7538	0.357872	0.0491548	5	17	3.03081e-07	0.00033248
6611	CU999373	hypothetical protein BRAFLDRAFT_82913 [Branchiostoma floridae]	4	female gonad	0.350473	0.165793	-0.83081	0.0977775	0.221021	0.428051	-0.690931	0.095499	-0.809951	0.125494	-0.826728	0.0816008	28.0586	6.10407	0.739659	5	17	1.20244e-07	0.000148862
28806	CX068763	0	4	female gonad	0.00807268	0.0711421	-0.388207	0.0345328	-0.206917	0.0236632	-0.401496	0.0555635	-0.445281	0.0566554	-0.354086	0.108849	26.5679	0.560011	0.071667	5	17	1.80219e-07	0.000212478
6496	DV736667	0	4	female gonad	1.49674	0.243569	0.610116	0.188696	1.37043	0.243166	0.805843	0.054295	0.547096	0.0390472	0.441874	0.013736	27.8884	3.89325	0.474643	5	17	1.2581e-07	0.000154998
41559	ES789152	0	4	0	0.844711	0.195023	-1.12445	0.0698768	0.449286	0.209803	-0.288602	0.0899031	-0.897858	0.17151	-1.217	0.415892	57.4805	14.5862	0.862781	5	17	4.73843e-10	9.02197e-07
40415	ES789818	0	4	female gonad	-0.164424	0.0514531	-0.779112	0.125136	-0.49804	0.0461756	-0.894765	0.0353007	-1.0571	0.129827	-0.825254	0.104656	49.8323	1.92914	0.131623	5	17	1.46646e-09	2.64402e-06
29771	AM856370	(sp:Q8NFP4) MAM domain-containing glycosylphosphatidylinositol anchor protein 1 OS=Homo sapiens GN=MDGA1 PE=1 SV=1	4	female gonad	1.53918	0.201906	-0.235678	0.131989	0.978883	0.361226	0.154929	0.127888	0.028077	0.172275	-0.472778	0.273901	44.5312	11.7812	0.899502	5	17	3.54096e-09	6.07983e-06
15552	EW779006	0	4	female gonad	1.80772	0.0571724	0.790389	0.130496	1.49343	0.0500051	1.16257	0.0623117	0.967041	0.0756149	0.71956	0.0503593	122.032	3.5564	0.0990867	5	17	1.05826e-12	2.46258e-09
38606	FP000062	0	4	0	1.74731	0.328341	0.708248	0.0613606	0.920456	0.311186	0.892172	0.131576	0.709542	0.0613074	0.700193	0.0358582	15.8781	3.21551	0.688541	5	17	6.95384e-06	0.00433224
34105	FP000752	0	4	female gonad	2.30052	0.048171	1.32013	0.0425748	2.09843	0.0727625	1.72388	0.0427646	1.60379	0.0763524	1.34202	0.039402	214.907	3.16581	0.0500857	5	17	9.65894e-15	2.37224e-11
4969	FP000833	(sp:P11602) Lipoprotein lipase OS=Gallus gallus GN=LPL PE=1 SV=1	4	0	2.36993	0.107759	-0.1812	0.0489366	2.02954	0.326288	0.853412	0.283641	0.402757	0.385893	-0.183434	0.144192	84.2713	23.8678	0.962969	5	17	2.18672e-11	4.69707e-08
4144	AM856518	(sp:Q2YDC9) Programmed cell death protein 2 OS=Bos taurus GN=PDCD2 PE=2 SV=1	4	female gonad	0.312386	0.0774028	-0.0675424	0.0329729	0.0127393	0.073475	-0.108221	0.0935864	-0.118656	0.0627458	-0.0349297	0.0544325	21.2425	0.502753	0.080469	5	17	9.16157e-07	0.00085569
5860	FP001053	0	4	0	1.1611	0.0758978	0.835001	0.081838	0.919884	0.0392402	0.964937	0.0760368	0.907478	0.0169341	0.847177	0.0368562	14.9509	0.28137	0.0639866	5	17	1.04229e-05	0.0060036
4007	FP001859	0	4	0	1.92983	0.151826	0.306441	0.140158	0.917374	0.246803	0.55462	0.281555	0.477341	0.34177	0.419775	0.254013	25.2885	7.25797	0.975822	5	17	2.59161e-07	0.000290001
30785	FP002787	(sp:Q8BGN2) UPF0462 protein C4orf33 homolog OS=Mus musculus GN=D3Ertd751e PE=2 SV=1	4	0	0.969958	0.090566	0.546613	0.0332162	0.949749	0.0580009	0.966759	0.0443752	0.840054	0.0775325	0.592638	0.139571	22.2331	0.74794	0.114379	5	17	6.60711e-07	0.000653444
14801	FP003042	(sp:P35611) Alpha-adducin OS=Homo sapiens GN=ADD1 PE=1 SV=2	4	female gonad	2.00379	0.0879483	0.893051	0.0263767	1.83012	0.284043	1.14205	0.0686437	0.940231	0.171178	0.994093	0.080808	43.7139	4.6242	0.359663	5	17	4.09113e-09	6.92628e-06
34843	FP003515	0	4	0	1.96896	0.104057	1.6904	0.0371007	1.75473	0.0249297	1.61345	0.0549167	1.61736	0.0317831	1.8063	0.0837159	16.6673	0.345947	0.0705706	5	17	4.99916e-06	0.00334444
11951	FP003526	0	4	0	1.63449	0.323372	0.427342	0.340297	0.876731	0.25428	0.303766	0.288094	0.176166	0.307555	0.171919	0.284285	13.9983	6.32276	1.53572	5	17	1.61311e-05	0.00846883
12095	FP003867	0	4	0	2.13314	0.33313	0.60507	0.14235	1.72554	0.345598	1.43012	0.119703	1.08657	0.12391	1.07835	0.126446	22.4374	5.76568	0.873691	5	17	6.18589e-07	0.000616734
19269	FP003956	0	4	female gonad	2.0408	0.122619	1.20627	0.0604387	1.91138	0.128643	1.4052	0.0373587	1.21814	0.064071	1.33292	0.0424761	70.2999	2.554	0.123522	5	17	9.46584e-11	1.93103e-07
12405	FP004546	0	4	0	2.2145	0.208994	0.778	0.0707022	1.47629	0.330376	1.09125	0.19499	0.917381	0.33964	0.711961	0.217483	22.563	6.3717	0.960147	5	17	5.94185e-07	0.000594185
25292	FP004996	0	4	0	2.25036	0.200513	0.889018	0.114862	1.78155	0.411108	1.24984	0.0945033	1.00201	0.156692	0.654676	0.0689159	32.1021	7.15095	0.75737	5	17	4.38105e-08	6.00204e-05
13856	FP005218	(sp:P33005) Anosmin-1 OS=Gallus gallus GN=KAL1 PE=2 SV=2	4	female gonad	1.8935	0.04008	0.153307	0.149644	1.52883	0.201258	0.727141	0.1008	0.364289	0.172298	0.268058	0.112567	108.563	10.2618	0.321382	5	17	2.76701e-12	6.31431e-09
5117	FP006202	0	4	0	1.44904	0.10756	1.02065	0.022748	1.34805	0.0901608	1.09408	0.0379061	0.887335	0.0260983	0.806502	0.0139205	62.8459	1.2366	0.066901	5	17	2.32603e-10	4.59624e-07
31821	FP006373	0	4	0	1.561	0.0802972	1.03177	0.14739	1.15618	0.0466188	0.895354	0.139192	1.05498	0.189099	1.18382	0.0540925	15.1552	1.02276	0.229452	5	17	9.518e-06	0.00561562
21730	FP007041	0	4	female gonad	1.16949	0.0763916	0.50605	0.118957	0.711854	0.117313	0.502955	0.10792	0.375404	0.067951	0.322839	0.0376865	42.6471	1.8775	0.149682	5	17	4.95846e-09	8.27071e-06
30383	FP007046	(sp:Q6NVR9) ATPase family AAA domain-containing protein 3 OS=Xenopus tropicalis GN=atad3 PE=2 SV=1	4	0	1.25429	0.0534713	0.793315	0.0605159	0.952261	0.041155	0.613774	0.0387285	0.567035	0.0733822	0.794766	0.0390692	90.33	1.1821	0.0444941	5	17	1.24344e-11	2.71194e-08
43740	AM857075	(sp:Q17RR3) Pancreatic lipase-related protein 3 OS=Homo sapiens GN=PNLIPRP3 PE=2 SV=2	4	0	2.50434	0.0710648	0.265466	0.086087	2.45794	0.114748	1.51777	0.304722	1.04537	0.412824	0.217286	0.0469295	99.0049	20.468	0.702906	5	17	5.88452e-12	1.31637e-08
27777	FP007720	0	4	0	1.88264	0.032932	1.51155	0.0328589	1.70009	0.0536069	1.50312	0.0134007	1.48166	0.0343511	1.55316	0.0437447	68.2175	0.476585	0.0237533	5	17	1.20545e-10	2.43863e-07
17630	FP008205	(sp:Q6NRQ2) Nucleolar complex protein 4 homolog A OS=Xenopus laevis GN=noc4l-A PE=2 SV=1	4	0	1.74568	0.0661425	1.36808	0.0749731	1.51783	0.0398965	1.46407	0.0363089	1.39835	0.110879	1.31788	0.0234368	24.2213	0.462726	0.0649538	5	17	3.55239e-07	0.000384014
2430	FP008277	0	4	0	1.67379	0.119908	1.08186	0.148864	1.2811	0.0969364	0.972665	0.0418834	0.880811	0.140666	1.06476	0.147407	21.2178	1.54658	0.247829	5	17	9.23808e-07	0.000860989
40277	FP010320	0	4	0	1.68653	0.13928	0.0993414	0.0755353	1.75881	0.11097	1.6401	0.0730194	1.81042	0.366029	0.591807	0.113937	81.069	10.3757	0.435151	5	17	2.99411e-11	6.36247e-08
45076	FP010348	0	4	0	1.0396	0.150342	-0.0483794	0.0404105	0.569175	0.240371	0.222662	0.119748	0.0986484	0.0814107	-0.128754	0.112813	38.3857	3.84417	0.340496	5	17	1.11974e-08	1.75911e-05
1843	FP010673	0	4	0	1.4099	0.0687233	0.896763	0.0611757	1.15662	0.105041	0.890801	0.0699554	0.79628	0.0281125	0.789193	0.0667592	44.8575	1.16272	0.0881295	5	17	3.34485e-09	5.77656e-06
24809	FP011985	(sp:O60583) Cyclin-T2 OS=Homo sapiens GN=CCNT2 PE=1 SV=2	4	0	2.08621	0.0172888	1.74661	0.052987	1.7678	0.057907	1.63291	0.0775851	1.56534	0.0222682	1.6167	0.0924627	36.1161	0.680654	0.0640774	5	17	1.78787e-08	2.68538e-05
5585	FP012002	(sp:Q01112) Cell division control protein 42 homolog OS=Schizosaccharomyces pombe GN=cdc42 PE=1 SV=1	4	female gonad	0.405542	0.168902	-0.425246	0.146706	0.401993	0.367862	-0.22398	0.0562349	-0.29582	0.11967	-0.38056	0.0611854	16.4692	2.93288	0.60548	5	17	5.42438e-06	0.00359094
17372	FP089743	0	4	0	2.50451	0.070397	0.772442	0.112627	2.49952	0.0373596	1.69555	0.378524	1.16726	0.404371	-0.377772	0.190297	90.0658	24.4402	0.922621	5	17	1.27346e-11	2.77359e-08
42088	FP089778	0	4	female gonad	0.959402	0.0441587	-0.0659089	0.278961	0.816327	0.107501	0.482435	0.131494	0.196999	0.0748371	-0.125672	0.302908	22.5683	4.06435	0.61231	5	17	5.93169e-07	0.000594356
21130	FP089789	0	4	0	2.10301	0.041036	1.64057	0.0422143	1.80313	0.0540235	1.64841	0.103532	1.59134	0.0513708	1.52492	0.0509198	45.5157	0.861679	0.064367	5	17	2.98505e-09	5.191e-06
38564	FP089790	0	4	0	0.0418012	0.0790809	-0.768822	0.148328	0.0983824	0.04057	-0.0140451	0.0460789	-0.591201	0.032397	-0.696634	0.11754	77.6772	3.18976	0.139619	5	17	4.23191e-11	8.89125e-08
17440	FP089813	(sp:P06857) Pancreatic lipase-related protein 1 OS=Canis familiaris GN=PNLIPRP1 PE=1 SV=2	4	female gonad	0.693256	0.21151	-0.921057	0.215215	0.381345	0.279038	-0.312056	0.210855	-0.52146	0.271904	-0.653454	0.309062	24.6925	7.80392	1.07455	5	17	3.08623e-07	0.000337942
7000	FP089841	0	4	0	2.50283	0.0687664	-0.214195	0.104502	2.50134	0.0217187	2.23124	0.078881	0.151669	0.338969	-0.665818	0.234527	315.898	42.91	0.461839	5	17	3.33067e-16	8.25673e-13
14600	FP089884	(sp:P05690) Vitellogenin-2 OS=Caenorhabditis elegans GN=vit-2 PE=1 SV=5	4	0	1.79992	0.124241	-1.13428	0.161831	1.3488	0.154251	0.729861	0.19459	-1.09114	0.389974	-2.19788	0.840363	62.6538	50.356	2.73264	5	17	2.38364e-10	4.70291e-07
42951	FP089925	(sp:O35161) Cadherin EGF LAG seven-pass G-type receptor 1 OS=Mus musculus GN=Celsr1 PE=2 SV=2	4	female gonad	0.758652	0.135877	-0.368986	0.0714074	0.110821	0.113996	-0.587767	0.0422618	-0.58764	0.0412217	-0.623858	0.21031	80.5271	5.94758	0.251118	5	17	3.1613e-11	6.6988e-08
7135	DV736924	0	4	0	1.90894	0.16565	-0.269554	0.0952362	1.95942	0.100182	1.84758	0.155176	2.16037	0.0961287	0.143215	0.293322	151.741	21.8004	0.488472	5	17	1.74971e-13	4.19231e-10
14133	CX069168	(sp:P05690) Vitellogenin-2 OS=Caenorhabditis elegans GN=vit-2 PE=1 SV=5	4	0	2.06134	0.142435	-1.01977	0.0493633	1.85557	0.165933	1.46129	0.145599	-0.576347	0.284227	-1.21903	0.23579	283.866	45.3128	0.542732	5	17	8.88178e-16	2.19913e-12
6328	AY551096	"(sp:Q4R502) Isocitrate dehydrogenase [NADP], mitochondrial OS=Macaca fascicularis GN=IDH2 PE=2 SV=1"	4	0	2.37442	0.0520784	1.83835	0.0846689	2.25496	0.0779433	2.10849	0.0520799	1.97494	0.0463886	1.93306	0.0287204	44.6675	0.824822	0.0627837	5	17	3.45749e-09	5.95726e-06
16466	AM857524	(sp:Q91XQ5) Carbohydrate sulfotransferase 15 OS=Mus musculus GN=Chst15 PE=2 SV=1	4	0	0.956935	0.112516	-0.0897503	0.21114	0.628964	0.108313	-0.066509	0.169839	-0.265399	0.0882988	-0.518479	0.148767	56.4104	6.22901	0.375439	5	17	5.50153e-10	1.03869e-06
40368	CU984027	(sp:P15308) Protein B4 OS=Xenopus laevis GN=b4 PE=1 SV=1	4	0	2.50361	0.0698997	-0.014816	0.160659	2.49877	0.0235601	1.57304	0.103738	0.402489	0.21761	-0.0929331	0.0892989	397.253	28.5875	0.244673	5	17	1.11022e-16	2.75446e-13
27018	AM860997	"Toxoplasma gondii ME49 hypothetical protein, mRNA"	4	0	2.50469	0.0718458	0.628257	0.165799	2.45458	0.124436	1.71242	0.294118	1.19508	0.453089	-0.0389946	0.126197	80.8462	20.5035	0.862278	5	17	3.06161e-11	6.50285e-08
14727	AM863513	0	4	0	1.50999	0.0323511	0.141449	0.289195	1.20819	0.0939187	0.602728	0.0680408	0.315572	0.153096	-0.0624455	0.0640155	73.1506	7.60686	0.353562	5	17	6.87238e-11	1.42052e-07
15699	AM857755	0	4	0	1.37796	0.0966769	0.808143	0.0676459	1.27997	0.080937	1.10204	0.0805251	0.889362	0.164771	0.511731	0.0621881	47.8165	2.06418	0.146774	5	17	2.02868e-09	3.61511e-06
27763	CU681562	0	4	female gonad	2.22862	0.0638968	1.21576	0.0635813	2.06171	0.0310951	1.65118	0.0959052	1.44638	0.0465917	1.22311	0.0650915	171.342	3.62451	0.0719226	5	17	6.38378e-14	1.55254e-10
43883	AM865152	0	4	female gonad	1.55762	0.1565	-0.510017	0.071533	1.04411	0.430857	0.00712348	0.213488	-0.189155	0.231457	-0.646716	0.285247	47.0604	15.6921	1.13372	5	17	2.29881e-09	4.062e-06
11913	AM857802	(sp:P18142) cAMP-regulated D2 protein OS=Dictyostelium discoideum GN=D2 PE=2 SV=3	4	0	1.39991	0.293017	-0.42729	0.454457	0.640228	0.285422	0.159925	0.293275	-0.203539	0.321413	0.185852	0.143018	17.1381	8.30477	1.64757	5	17	4.12999e-06	0.00291164
38194	BQ426231	0	4	0	1.26264	0.0834153	0.913036	0.0171226	1.13695	0.109932	1.10708	0.0460855	0.909015	0.0524723	0.890557	0.115248	14.2236	0.459063	0.109734	5	17	1.45184e-05	0.00776733
37623	CU991832	PREDICTED: hypothetical protein [Strongylocentrotus purpuratus]	4	0	1.77339	0.12758	0.713571	0.43201	1.50538	0.0901794	0.965298	0.134743	0.730768	0.183201	0.174509	0.103057	28.9044	6.68696	0.78658	5	17	9.63709e-08	0.00012162
28569	AM864378	0	4	0	2.40447	0.0610056	0.504369	0.711694	2.27788	0.111725	1.33259	0.0945701	0.529146	0.343923	0.0635184	0.160566	33.7854	18.9683	1.90888	5	17	2.97394e-08	4.2557e-05
7275	AM860211	(sp:Q6VFT5) Forkhead box protein L2 OS=Oryctolagus cuniculus GN=FOXL2 PE=4 SV=1	4	female gonad	1.45812	0.0994438	-0.0556985	0.190206	1.48857	0.0990315	1.3418	0.143647	1.65151	0.155126	0.596639	0.189962	75.534	8.57339	0.385913	5	17	5.30566e-11	1.10835e-07
16951	AM857861	0	4	0	2.27044	0.09338	-0.0418068	0.0236711	2.15303	0.131248	0.951865	0.234491	0.290779	0.262842	-0.122783	0.0535417	196.435	22.6045	0.39125	5	17	2.04281e-14	4.99467e-11
1763	FP089838	0	4	0	2.50306	0.0689576	0.0194422	0.126452	2.21772	0.328367	1.00899	0.374685	0.46021	0.406421	-0.754003	0.0468082	94.7579	31.8779	1.14381	5	17	8.41804e-12	1.8587e-08
37891	EW779447	(sp:Q9XSK2) CD63 antigen OS=Bos taurus GN=CD63 PE=2 SV=4	4	female gonad	2.33159	0.120587	0.100252	0.0639641	2.09889	0.339334	0.847108	0.421915	0.463607	0.387854	-0.173774	0.0619063	58.862	21.6013	1.24774	5	17	3.92246e-10	7.53898e-07
34994	AM865990	0	4	female gonad	1.47595	0.0785497	0.590225	0.0537228	0.985938	0.225098	0.709616	0.10213	0.399072	0.16456	0.426647	0.157125	32.1804	3.20566	0.338692	5	17	4.30118e-08	5.90982e-05
7104	AM857574	(sp:P55043) GTP-binding protein RAD OS=Rattus norvegicus GN=Rrad PE=2 SV=2	4	adductor muscle	1.28192	0.138502	-0.39577	0.127852	1.05067	0.220332	0.64116	0.232938	0.741754	0.712931	-0.165294	0.177252	19.8044	8.88754	1.5258	5	17	1.5074e-06	0.00130541
43	AM857422	hypothetical protein BRAFLDRAFT_127145 [Branchiostoma floridae]	4	0	0.213737	0.163257	-0.725639	0.141369	-0.28107	0.0934274	-0.687028	0.125035	-0.757265	0.17506	-0.60783	0.206453	23.5419	2.78461	0.402162	5	17	4.36938e-07	0.000457037
7880	AM857978	(sp:O70273) ETS homologous factor OS=Mus musculus GN=Ehf PE=2 SV=1	4	female gonad	0.619473	0.127572	-0.0382367	0.0249871	0.0966877	0.0618311	-0.228757	0.0623735	-0.306089	0.0362185	-0.248003	0.0602364	90.0769	2.31408	0.0873464	5	17	1.27218e-11	2.77209e-08
32807	AM855991	(sp:O08918) Cyclin-G2 OS=Mus musculus GN=Ccng2 PE=2 SV=3	4	female gonad	1.13659	0.276131	-0.463744	0.0996689	1.14368	0.366735	0.00756512	0.30899	-0.145557	0.199187	-0.333766	0.0939409	33.6749	10.442	1.05428	5	17	3.04889e-08	4.35077e-05
29273	AM868677	(sp:P35224) Catenin beta OS=Urechis caupo PE=2 SV=1	4	0	2.50327	0.0706614	1.73457	0.0340757	2.44161	0.060392	2.06635	0.0224326	1.86398	0.0153396	1.55803	0.0381188	275.961	2.90113	0.0357436	5	17	1.22125e-15	3.02258e-12
36436	AM859885	(sp:Q28J76) Uncharacterized protein CXorf39 homolog OS=Xenopus tropicalis GN=TNeu080p02.1 PE=2 SV=1	4	female gonad	1.37151	0.0177153	0.982847	0.0399667	1.15986	0.0875844	0.870824	0.0256893	0.796272	0.0367126	1.05443	0.110085	39.0492	0.801407	0.0697782	5	17	9.81211e-09	1.55522e-05
19398	AM857104	(sp:P82890) Low molecular weight phosphotyrosine protein phosphatase 1 OS=Drosophila melanogaster GN=primo-1 PE=2 SV=1	4	0	1.43931	0.0826887	1.12625	0.0574324	1.31469	0.097196	1.11557	0.062664	1.08323	0.0245471	1.2852	0.0445086	16.4525	0.37588	0.0776774	5	17	5.46198e-06	0.00361037
39968	AM867928	(sp:Q61103) Zinc finger protein ubi-d4 OS=Mus musculus GN=Dpf2 PE=1 SV=1	4	female gonad	1.3568	0.278548	0.241974	0.0395287	1.37214	0.342787	0.427505	0.187464	0.302452	0.150222	0.238205	0.0998317	26.3808	5.97778	0.770425	5	17	1.89867e-07	0.000220816
36261	EE677697	"(sp:Q7QC84) Probable methylmalonate-semialdehyde dehydrogenase [acylating], mitochondrial OS=Anopheles gambiae GN=AGAP002499 PE=3 SV=2"	4	0	2.26976	0.0836946	1.71522	0.0619114	2.17333	0.0980035	2.08374	0.0591033	2.01506	0.0576866	1.75622	0.0657795	37.257	1.00203	0.0914434	5	17	1.40857e-08	2.16638e-05
41025	CU994694	(sp:P60323) Nanos homolog 3 OS=Homo sapiens GN=NANOS3 PE=2 SV=1	4	0	2.09441	0.0480319	-0.703281	0.0533255	1.96485	0.0959752	1.11001	0.141465	-0.199113	0.269475	-0.77092	0.0444099	449.897	33.6459	0.254272	5	17	0	0
3852	BQ426946	(sp:P60755) MAM domain-containing glycosylphosphatidylinositol anchor protein 2 OS=Mus musculus GN=Mdga2 PE=2 SV=1	4	0	2.50316	0.0699042	0.773562	0.137766	2.25889	0.322451	1.2581	0.236521	0.960445	0.331829	0.577121	0.403301	34.4334	12.7558	1.25952	5	17	2.57364e-08	3.74721e-05
24394	AM865539	0	4	0	1.88775	0.0823216	1.15168	0.0824543	1.57441	0.0729676	1.27622	0.0818794	1.23156	0.0428746	1.20723	0.0549182	61.3037	1.61439	0.0895367	5	17	2.83674e-10	5.57419e-07
9867	AM859157	0	4	0	2.38963	0.0790562	1.75837	0.085176	2.11704	0.118833	1.76915	0.0752074	1.83697	0.0368571	1.85008	0.110807	30.2191	1.23897	0.139399	5	17	6.90764e-08	9.0421e-05
11208	FP089774	0	4	0	2.5049	0.0707865	0.291948	0.0967206	2.35564	0.311085	1.2629	0.376911	0.766451	0.463699	-0.567163	0.144812	76.9935	28.3642	1.25255	5	17	4.5455e-11	9.541e-08
5674	AB084783	(sp:P18948) Vitellogenin-6 OS=Caenorhabditis elegans GN=vit-6 PE=1 SV=5	4	0	2.50513	0.0710314	0.0775459	0.150676	2.5066	0.0247991	2.37992	0.0484055	0.431789	0.25445	-0.273835	0.189383	355.723	34.4432	0.329208	5	17	1.11022e-16	2.75446e-13
23054	AM858435	0	4	female gonad	2.49563	0.0646031	1.84697	0.0445171	2.43653	0.0984803	1.90466	0.0635615	1.66807	0.0804157	1.54919	0.0641002	120.809	3.01814	0.0849412	5	17	1.14986e-12	2.66882e-09
25257	AM858441	0	4	0	1.23149	0.188044	0.562207	0.022734	0.915953	0.135208	0.556509	0.100643	0.547088	0.0765005	0.521517	0.028659	27.1222	1.65151	0.207031	5	17	1.54694e-07	0.000186251
33459	AM237660	(sp:P91753) Mitotic apparatus protein p62 OS=Lytechinus pictus PE=2 SV=1	4	0	2.50506	0.0709632	1.31796	0.208565	2.50567	0.0243124	2.28892	0.0487459	2.099	0.129838	1.14091	0.259557	62.7144	7.19985	0.390333	5	17	2.3653e-10	4.67147e-07
17298	AM858504	0	4	female gonad	2.14548	0.0398486	1.11199	0.0786706	1.99949	0.091129	1.4191	0.136241	1.23883	0.152813	1.11958	0.100733	76.4126	4.06952	0.181074	5	17	4.83242e-11	1.01191e-07
43030	AM860516	0	4	0	0.851014	0.0956964	0.361298	0.042364	0.580307	0.0294441	0.667265	0.0989021	0.428991	0.0574488	0.34588	0.0963403	26.491	0.77329	0.0992483	5	17	1.84118e-07	0.000216155
2146	AM866826	0	4	0	1.24235	0.122152	0.883537	0.0357754	0.930013	0.0893475	0.855636	0.0308253	0.704148	0.0169602	0.709097	0.0464335	30.5888	0.741742	0.0824458	5	17	6.30464e-08	8.34735e-05
45040	FP002862	0	4	0	1.89059	0.336798	0.76786	0.119391	1.10927	0.217498	1.06633	0.195783	0.74124	0.071276	0.808129	0.0952955	18.3807	3.66195	0.677375	5	17	2.54402e-06	0.00199706
15534	AM855592	"(sp:Q17M80) Probable methylmalonate-semialdehyde dehydrogenase [acylating], mitochondrial OS=Aedes aegypti GN=AAEL001134 PE=3 SV=1"	4	0	1.41843	0.104093	0.889089	0.0556808	1.18828	0.104091	1.08956	0.0799885	1.03201	0.0824862	0.808114	0.0336347	29.3068	0.952536	0.110508	5	17	8.69133e-08	0.000111075
29540	AM237774	0	4	0	1.2805	0.102068	0.607469	0.0567905	1.02275	0.0643906	0.974466	0.0379157	0.817829	0.00204356	0.557311	0.0512754	76.9416	1.48398	0.0655762	5	17	4.57033e-11	9.58399e-08
1313	AM864323	0	4	0	0.27773	0.133929	-0.258313	0.0886773	-0.167255	0.0853861	-0.0651147	0.0851908	-0.242666	0.112472	-0.346477	0.0971439	19.0526	0.978728	0.174657	5	17	1.97935e-06	0.00162109
8911	AM862974	(sp:P56839) Phosphoenolpyruvate phosphomutase OS=Mytilus edulis PE=1 SV=3	4	0	1.03151	0.167904	0.636027	0.132385	0.543304	0.135772	0.359441	0.104979	0.24535	0.125612	0.146391	0.115232	22.7287	1.98481	0.296909	5	17	5.6361e-07	0.000570373
21821	AM865235	0	4	0	2.17901	0.0530331	-0.336568	0.0993829	1.79949	0.134278	0.783969	0.0551349	-0.00998211	0.118095	-0.536275	0.167705	406.366	25.5231	0.213548	5	17	0	0
17811	BQ426950	0	4	0	1.8243	0.0685687	1.49933	0.0776443	1.63272	0.0504947	1.4943	0.00842896	1.47328	0.0454064	1.53303	0.0270653	25.5319	0.348242	0.0463743	5	17	2.41563e-07	0.000272725
1328	EW778474	(sp:P42929) Heat shock protein beta-1 OS=Canis familiaris GN=HSPB1 PE=2 SV=1	4	0	1.57036	0.0825076	0.634843	0.0429194	1.05972	0.161667	0.838441	0.0545732	0.80298	0.10344	0.447493	0.121034	57.9154	3.04294	0.17864	5	17	4.46273e-10	8.52828e-07
9058	AJ563467	(sp:Q24800) Severin OS=Echinococcus granulosus GN=AG8 PE=2 SV=3	4	0	1.37663	0.326271	0.212622	0.184226	0.721895	0.193006	0.313716	0.102835	0.0670153	0.156094	-0.0207634	0.216575	24.1365	5.35333	0.7541	5	17	3.64441e-07	0.000392502
15871	AM857623	0	4	0	1.31525	0.175085	0.103668	0.126598	1.08592	0.327469	0.922707	0.192174	0.561929	0.285922	0.184013	0.0415679	22.2597	4.85282	0.741233	5	17	6.55055e-07	0.000648504
1567	DV736337	(sp:A3KPQ7) Transmembrane protein 2 OS=Danio rerio GN=tmem2 PE=3 SV=1	4	0	2.14158	0.0948299	0.527203	0.334279	1.6435	0.259416	0.660009	0.218691	0.352437	0.188648	0.175679	0.318053	38.0847	12.1224	1.08222	5	17	1.18968e-08	1.8571e-05
7292	AM860498	(sp:Q4R6T7) IQ and ubiquitin-like domain-containing protein OS=Macaca fascicularis GN=IQUB PE=2 SV=2	4	female gonad	0.954153	0.353185	-0.33192	0.0559678	0.994491	0.388839	0.116133	0.145322	-0.0586145	0.157903	-0.302044	0.147444	23.8671	7.12955	1.01565	5	17	3.95478e-07	0.000418811
15211	CU991496	(sp:P16889) Late histone H2B.L3 OS=Strongylocentrotus purpuratus PE=1 SV=3	4	0	2.50513	0.0710308	0.66801	0.254876	2.50559	0.0240913	1.95578	0.0964351	1.43953	0.349008	0.43912	0.174715	94.6595	16.0044	0.574851	5	17	8.48976e-12	1.87284e-08
15795	AM860128	0	4	0	1.64736	0.0915401	0.917881	0.0333128	1.33696	0.173786	1.23779	0.149722	1.14881	0.213926	0.961371	0.0634186	16.7998	1.43252	0.289917	5	17	4.73535e-06	0.00323424
33915	AM858509	0	4	0	0.0511867	0.0745751	-0.731735	0.142389	-0.322099	0.0446588	-0.401668	0.0677852	-0.45107	0.0850637	-0.596212	0.13023	30.0958	1.43953	0.162627	5	17	7.12302e-08	9.29554e-05
40719	CX068843	0	4	female gonad	2.20506	0.556707	0.415781	0.228433	2.01314	0.52849	1.07676	0.195059	0.689674	0.326615	0.276192	0.132837	19.6095	13.2921	2.30465	5	17	1.61636e-06	0.00137714
11396	AM863383	0	4	0	1.80787	0.102454	1.41489	0.0289309	1.59697	0.0733806	1.37674	0.0693246	1.43011	0.0590918	1.49293	0.0708832	19.9492	0.508296	0.0866305	5	17	1.43181e-06	0.00124424
31918	AM859023	0	4	0	2.50512	0.0710325	0.611049	0.162332	2.5066	0.0248051	2.17857	0.132156	1.00302	0.173843	0.352915	0.130776	248.886	19.0459	0.260183	5	17	2.88658e-15	7.12119e-12
6514	CU987036	(sp:Q78PB6) Nuclear distribution protein nudE-like 1 OS=Rattus norvegicus GN=Ndel1 PE=1 SV=1	4	female gonad	1.88969	0.211226	-0.00552739	0.0625785	1.75694	0.376075	0.568574	0.398609	0.198465	0.269404	-0.0965841	0.0618245	43.6415	15.4438	1.20319	5	17	4.14432e-09	6.99976e-06
27525	AM859957	0	4	0	2.39215	0.0845951	1.04114	0.0319084	1.81027	0.300581	1.43731	0.174217	1.21294	0.224207	1.00745	0.209279	31.0224	5.64385	0.618556	5	17	5.67122e-08	7.57108e-05
36375	AM867748	0	4	0	1.71517	0.15415	-0.503431	0.037192	1.15938	0.328966	-0.0203549	0.226423	-0.313354	0.122222	-0.527032	0.0671944	101.371	17.8091	0.597316	5	17	4.8509e-12	1.09097e-08
31997	AM867755	0	4	0	1.49402	0.114989	1.12502	0.147779	1.16501	0.1275	0.95269	0.083274	0.834492	0.0921497	0.789064	0.0935517	20.346	1.30451	0.217995	5	17	1.24535e-06	0.00109965
19271	DV736482	(sp:Q8TCA0) Leucine-rich repeat-containing protein 20 OS=Homo sapiens GN=LRRC20 PE=2 SV=1	4	0	1.63474	0.114784	0.827756	0.0304404	1.22143	0.0721978	1.16247	0.0828204	0.863761	0.138105	0.72551	0.129124	45.6	2.23556	0.166686	5	17	2.94221e-09	5.12533e-06
37610	AM862260	0	4	0	1.98513	0.0781554	-0.215256	0.044861	1.91239	0.0893217	1.34138	0.24279	0.964978	0.756596	-0.202617	0.339415	38.3374	19.3449	1.71562	5	17	1.13064e-08	1.77059e-05
32806	AM858715	0	4	0	2.36891	0.0477596	-0.55193	0.073953	2.05384	0.127441	1.21852	0.0691502	0.130726	0.285871	-0.667185	0.045438	452.909	34.0957	0.255957	5	17	0	0
23561	AM859393	0	4	0	0.795956	0.0393759	0.584277	0.0129361	0.537877	0.0498764	0.448235	0.0484232	0.420008	0.105547	0.437691	0.0651459	24.1657	0.388521	0.0546632	5	17	3.61248e-07	0.000389786
26109	AM859658	0	4	0	1.48256	0.0945764	0.75865	0.05699	1.1993	0.0556605	0.879694	0.0896459	0.697549	0.126896	0.747735	0.0940368	49.9945	1.89267	0.128715	5	17	1.4294e-09	2.58006e-06
14733	AM860121	(sp:Q810T2) G2/mitotic-specific cyclin-B3 OS=Mus musculus GN=Ccnb3 PE=2 SV=2	4	0	1.49433	0.0524975	0.117817	0.230888	1.04232	0.0997826	0.516469	0.116795	0.148648	0.317328	-0.197199	0.222975	46.1409	8.00052	0.589536	5	17	2.68296e-09	4.70054e-06
9327	AM860522	0	4	0	2.26755	0.0299148	-0.656064	0.135235	1.88297	0.156203	1.06218	0.0799157	-0.0563654	0.242805	-0.888779	0.563765	97.4616	35.009	1.22131	5	17	6.69054e-12	1.48931e-08
2730	AM860547	(sp:Q05733) Histidine decarboxylase OS=Drosophila melanogaster GN=Hdc PE=1 SV=2	4	visceral ganglion	0.498243	0.0971762	-0.189471	0.0562755	0.175982	0.0618866	0.0685979	0.0744031	0.0588256	0.0999283	-0.0434608	0.0470933	39.8109	1.0837	0.0925524	5	17	8.45271e-09	1.35581e-05
17462	AM860952	(sp:O75897) Sulfotransferase 1C4 OS=Homo sapiens GN=SULT1C4 PE=1 SV=2	4	0	0.890193	0.302709	-0.105712	0.145958	0.683633	0.14396	0.134204	0.121723	-0.164392	0.0303646	-0.336159	0.0893685	34.4909	4.7804	0.471236	5	17	2.54114e-08	3.70752e-05
24867	AM861118	PREDICTED: coiled-coil domain containing 45 [Taeniopygia guttata]	4	0	1.29803	0.0553149	-0.764159	0.129719	0.851283	0.156008	0.133047	0.078021	-0.0421349	0.325306	-0.946392	0.271197	89.9495	15.4297	0.583228	5	17	1.28693e-11	2.80035e-08
31244	AM861162	hydrolase [gamma proteobacterium NOR5-3]	4	female gonad	2.10489	0.0554455	0.0131799	0.17828	1.87404	0.132687	0.769445	0.0656295	0.142333	0.178771	-0.075571	0.0657787	250.91	18.2435	0.247212	5	17	2.66454e-15	6.57607e-12
36615	AM861291	(sp:P21783) Neurogenic locus notch protein homolog OS=Xenopus laevis GN=notch1 PE=1 SV=3	4	0	1.7746	0.0876567	-0.700799	0.0848029	1.53066	0.111053	0.30678	0.233759	-0.297281	0.212343	-0.634395	0.147708	197.039	23.2498	0.401185	5	17	1.9984e-14	4.88809e-11
40569	AM861806	0	4	0	-0.192077	0.0961765	-0.692207	0.0741285	-0.648573	0.0786857	-0.784643	0.108667	-0.862268	0.0294669	-0.793062	0.0540282	35.498	1.13519	0.108729	5	17	2.04016e-08	3.02556e-05
12315	AM862314	(sp:P17892) Pancreatic lipase-related protein 2 OS=Mus musculus GN=Pnliprp2 PE=2 SV=1	4	0	2.15015	0.0698186	-0.617214	0.103115	1.81045	0.299938	0.594299	0.282263	0.130786	0.473912	-0.829131	0.1579	95.0888	30.1882	1.07941	5	17	8.18201e-12	1.80822e-08
24427	AM862423	(sp:Q27972) Chondroadherin OS=Bos taurus GN=CHAD PE=1 SV=1	4	0	0.711859	0.149776	-0.0534859	0.0721497	0.176432	0.233719	-0.0813448	0.181425	-0.201422	0.224721	-0.294773	0.197698	15.6365	2.59284	0.563786	5	17	7.713e-06	0.00471264
18384	AM862874	0	4	0	1.5162	0.0803277	0.593576	0.0383755	1.32627	0.10724	0.680368	0.104176	0.850486	0.168057	0.914544	0.160767	40.1106	2.65272	0.224859	5	17	7.97663e-09	1.28823e-05
9383	AM863199	0	4	female gonad	1.61932	0.0941265	0.551815	0.108103	1.30828	0.0899726	0.728611	0.0434136	0.493878	0.0513005	0.527052	0.142574	94.5035	4.38672	0.157823	5	17	8.60478e-12	1.89477e-08
9973	AM863247	(sp:Q7QH73) Chorion peroxidase OS=Anopheles gambiae GN=pxt PE=2 SV=3	4	0	1.17349	0.314441	-0.572171	0.0476208	0.884867	0.126786	-0.10812	0.148627	-0.282449	0.279734	-0.617068	0.170594	59.3404	11.5492	0.661727	5	17	3.67758e-10	7.12346e-07
28607	AM863445	0	4	0	1.30773	0.134084	0.657174	0.0798888	0.936986	0.0759288	0.900439	0.0219857	0.893931	0.137687	0.848347	0.0742886	20.9679	0.902234	0.146299	5	17	1.0053e-06	0.000916835
5375	AM863478	0	4	0	1.35678	0.0755773	1.04751	0.0389027	0.988764	0.0230998	0.800474	0.0535747	0.837517	0.0922973	1.02806	0.0632113	42.0518	0.753372	0.0609121	5	17	5.53072e-09	9.14228e-06
24195	AM863501	axis inhibitor 1 [Saccoglossus kowalevskii]	4	female gonad	0.87644	0.0617076	0.19927	0.0713465	0.534482	0.0610159	0.168715	0.0383342	0.0863813	0.036668	0.198918	0.0947	83.5597	1.76618	0.0718652	5	17	2.34255e-11	5.02008e-08
21926	AM863555	0	4	0	0.494381	0.205656	-0.971717	0.0984617	0.127231	0.252271	-0.375338	0.19868	-0.577221	0.144596	-0.905886	0.334914	27.0051	6.70068	0.843629	5	17	1.5973e-07	0.000191516
8310	AM863784	0	4	0	2.22915	0.0771531	1.00189	0.149226	1.92384	0.110086	0.661365	0.29235	0.666937	0.173105	0.739022	0.0876451	68.9418	9.33556	0.460401	5	17	1.10736e-10	2.24573e-07
38757	AM863960	(sp:P33450) Cadherin-related tumor suppressor OS=Drosophila melanogaster GN=ft PE=1 SV=3	4	female gonad	1.15414	0.141882	-0.0586443	0.0843782	0.708673	0.102303	-0.0879396	0.0910196	-0.170633	0.0773482	-0.217086	0.0874775	124.845	6.34964	0.172925	5	17	8.77187e-13	2.04823e-09
16270	AM864306	0	4	0	2.04908	0.0182539	1.44659	0.0516402	1.93375	0.0587709	1.75165	0.0396927	1.60902	0.060588	1.2289	0.0646828	144.455	1.86864	0.0439818	5	17	2.63012e-13	6.27283e-10
2562	AM864561	0	4	0	0.49726	0.230755	-1.03561	0.258704	0.134602	0.180127	-0.438121	0.183698	-0.589686	0.163691	-0.746345	0.128423	33.491	6.52251	0.662165	5	17	3.17846e-08	4.51023e-05
44021	AM864788	(sp:Q9JK72) Copper chaperone for superoxide dismutase OS=Rattus norvegicus GN=Ccs PE=1 SV=1	4	0	1.25904	0.0445623	0.622015	0.0351452	0.980152	0.0670753	0.905185	0.0296196	0.709376	0.0630362	0.670932	0.0511226	93.22	1.14002	0.0415799	5	17	9.62008e-12	2.11257e-08
8217	AM864938	0	4	0	0.787156	0.0949858	-0.0380764	0.285359	-0.105484	0.0930207	-0.370831	0.0783267	-0.663088	0.0727808	-0.553744	0.104216	49.2906	5.20302	0.358897	5	17	1.59815e-09	2.87028e-06
41409	AM865339	0	4	0	0.817993	0.129861	-0.0317979	0.136832	0.394634	0.104552	0.120764	0.0592008	-0.0239947	0.064239	-0.191302	0.130024	43.588	2.6799	0.209041	5	17	4.18412e-09	7.05443e-06
1451	AM865639	0	4	0	1.37299	0.100644	0.811534	0.0527133	0.956051	0.0788753	0.797531	0.02845	0.775256	0.0772949	0.827162	0.0581671	42.674	1.02813	0.0819154	5	17	4.93426e-09	8.23529e-06
31406	AM865748	0	4	0	1.04931	0.221474	-0.402305	0.199921	0.665796	0.270732	0.0301373	0.238037	-0.157917	0.147011	-0.46901	0.124545	33.6316	7.38598	0.746689	5	17	3.07888e-08	4.38741e-05
28079	AM866382	(sp:P12276) Fatty acid synthase OS=Gallus gallus GN=FASN PE=1 SV=5	4	0	1.76511	0.111534	0.535578	0.25404	0.988327	0.301175	0.566074	0.159598	0.93134	0.423016	0.455272	0.274972	13.9514	4.77701	1.16418	5	17	1.64914e-05	0.00859201
42016	AM866525	Hypothetical protein CBG03513 [Caenorhabditis briggsae]	4	0	1.25101	0.155989	0.604336	0.16352	0.79908	0.34174	0.0907622	0.128014	-0.0498542	0.114007	0.240381	0.216485	21.2708	4.50021	0.719329	5	17	9.07474e-07	0.000849395
15474	AM866691	0	4	0	2.4914	0.0609264	0.112765	0.0914811	2.25477	0.286212	1.09328	0.0667763	0.209325	0.598638	-1.02055	0.257332	101.88	36.2801	1.21077	5	17	4.6565e-12	1.04864e-08
39731	AM867243	0	4	0	1.77729	0.0397426	1.03946	0.0999325	1.49576	0.0507498	1.2763	0.0931925	1.28336	0.157845	0.842952	0.120693	45.5433	2.17013	0.162009	5	17	2.97094e-09	5.16943e-06
9197	AM867258	(sp:O95834) Echinoderm microtubule-associated protein-like 2 OS=Homo sapiens GN=EML2 PE=1 SV=1	4	0	0.909891	0.0530491	0.530499	0.0601222	0.723876	0.0885548	0.663022	0.0377083	0.537665	0.0362737	0.453964	0.0553932	31.1305	0.539428	0.058915	5	17	5.52457e-08	7.40845e-05
15173	AM867417	0	4	0	2.15676	0.0609459	-0.531508	0.0846866	2.02425	0.0889997	1.1738	0.142811	-0.0981182	0.255892	-0.73198	0.0771505	415.783	32.5808	0.266425	5	17	0	0
39502	AM867601	0	4	0	0.64145	0.18383	-0.824533	0.285394	0.0578676	0.25291	-0.557169	0.305768	-1.02542	0.254564	-0.73471	0.152652	25.4238	7.60931	1.01762	5	17	2.49209e-07	0.000280361
39134	AM868002	PREDICTED: hypothetical protein [Strongylocentrotus purpuratus]	4	0	0.368615	0.107058	-0.453834	0.133119	0.0941773	0.0808705	-0.0218429	0.0677717	-0.225606	0.0708808	-0.493506	0.117907	43.5903	2.21413	0.1727	5	17	4.18236e-09	7.05564e-06
29033	AM868083	(sp:P51637) Caveolin-3 OS=Mus musculus GN=Cav3 PE=1 SV=1	4	female gonad	2.21853	0.135504	0.422509	0.113611	1.70771	0.288182	0.799309	0.199021	0.560367	0.159412	0.385847	0.123189	70.0389	11.4973	0.558132	5	17	9.75341e-11	1.98482e-07
30529	AM868099	0	4	0	1.64437	0.0580124	1.06421	0.0385203	1.71269	0.0747021	1.52885	0.0424436	1.48587	0.107761	1.1216	0.0728307	65.7601	1.46667	0.0758312	5	17	1.61812e-10	3.24919e-07
5215	AM868368	0	4	female gonad	1.74974	0.260349	0.133058	0.167435	0.840181	0.172423	0.391178	0.104614	0.158299	0.371298	-0.344634	0.0369135	51.7931	10.5	0.689283	5	17	1.08177e-09	1.97315e-06
1891	AM868373	(sp:O35678) Monoglyceride lipase OS=Mus musculus GN=Mgll PE=1 SV=1	4	0	0.395989	0.0875206	-0.848604	0.159894	0.0623459	0.25165	-0.362718	0.131428	-0.698745	0.0864141	-0.622639	0.162307	35.5622	4.55453	0.435446	5	17	2.0122e-08	2.98812e-05
23789	AM868375	0	4	0	0.888574	0.14521	-1.19584	0.400291	0.301528	0.179445	-0.104971	0.104845	-0.149404	0.21789	-1.12712	0.364982	38.325	13.1672	1.16812	5	17	1.13348e-08	1.77389e-05
14240	AM868454	0	4	0	2.06159	0.0738815	-0.0318929	0.101374	1.87852	0.0487664	1.30232	0.269482	1.02822	0.766354	-0.206371	0.332029	34.5124	18.0432	1.77753	5	17	2.5291e-08	3.69501e-05
42105	AM868529	0	4	0	0.750423	0.159191	-0.0290035	0.124365	0.937477	0.0607538	0.868219	0.0739	0.798033	0.265516	-0.303361	0.225477	42.3598	5.52421	0.443399	5	17	5.2259e-09	8.66977e-06
39471	AM868901	0	4	0	0.56484	0.0466826	-0.728231	0.217607	0.201223	0.128634	0.324573	0.219283	-0.116191	0.0746159	-0.324972	0.170333	34.2727	4.44203	0.440668	5	17	2.66696e-08	3.86976e-05
38619	CU681768	0	4	0	2.50431	0.0708429	0.358414	0.108474	2.50661	0.0248072	2.42308	0.0618926	0.860128	0.326762	0.0762565	0.215182	212.722	26.0366	0.41615	5	17	1.05471e-14	2.58932e-11
37203	CU683293	0	4	female gonad	1.04232	0.0563849	0.411281	0.0757467	0.799545	0.0785106	0.431806	0.0550042	0.310409	0.0801171	0.275913	0.0417162	85.6603	1.82348	0.0723768	5	17	1.91484e-11	4.12647e-08
16749	CU683775	0	4	0	0.451251	0.102855	-0.359665	0.117386	0.367304	0.0966405	-0.0940597	0.0774161	-0.283971	0.1163	-0.211567	0.207359	28.7389	2.32546	0.275117	5	17	1.00591e-07	0.000126342
15158	CU684866	(sp:P58295) Sodium- and chloride-dependent glycine transporter 2 OS=Rattus norvegicus GN=Slc6a5 PE=2 SV=1	4	0	0.615852	0.320577	-0.31972	0.0394547	0.106093	0.204567	-0.303732	0.171325	-0.285407	0.0367013	-0.624332	0.159474	21.126	3.76271	0.605569	5	17	9.52857e-07	0.000879487
14411	CU686151	"(sp:Q5RFA3) Alanine--glyoxylate aminotransferase 2, mitochondrial OS=Pongo abelii GN=AGXT2 PE=2 SV=1"	4	0	0.895857	0.04445	0.472573	0.0897414	0.831954	0.0412536	0.692434	0.0235131	0.611087	0.081947	0.419544	0.0427498	44.1147	0.723551	0.0557654	5	17	3.81024e-09	6.50789e-06
37324	CU986522	(sp:A2BFC9) Uncharacterized protein FLJ46082 homolog OS=Danio rerio GN=si:ch211-215c18.4 PE=4 SV=1	5	0	0.136994	0.125305	1.19506	0.169949	0.423419	0.13984	0.353433	0.242987	1.36002	0.205065	1.34788	0.183853	36.0091	5.87854	0.555054	5	17	1.8289e-08	2.74517e-05
10585	CU986736	(sp:Q9NQC8) UPF0360 protein C11orf60 OS=Homo sapiens GN=C11orf60 PE=2 SV=1	5	0	1.83651	0.031267	2.30504	0.0446235	1.78528	0.0498555	1.76185	0.0783821	2.12314	0.108627	2.33142	0.0640646	65.7068	1.36645	0.070707	5	17	1.62868e-10	3.26875e-07
6085	CU987259	0	5	0	-0.284214	0.0752785	0.236485	0.0515526	-0.454337	0.0339404	-0.486221	0.0636971	-0.318721	0.051187	-0.332944	0.0901825	66.4495	1.37277	0.0702402	5	17	1.48831e-10	2.99447e-07
24910	CU987581	0	5	male gonad	0.433976	0.0410914	1.57973	0.0784338	0.30129	0.0750304	0.423154	0.132112	0.663524	0.349119	0.583459	0.219212	30.7681	4.35006	0.4807	5	17	6.03362e-08	8.01868e-05
34711	CU987688	(sp:P09480) Neuronal acetylcholine receptor subunit alpha-2 OS=Gallus gallus GN=CHRNA2 PE=2 SV=1	5	0	0.273267	0.050205	0.669889	0.045461	0.218355	0.0531417	0.195525	0.0607674	0.274248	0.0483396	0.299051	0.088497	33.7029	0.609433	0.0614805	5	17	3.0297e-08	4.32945e-05
1462	CU987737	(sp:Q3SZR5) UPF0573 protein C2orf70 homolog OS=Bos taurus PE=2 SV=1	5	0	0.517536	0.0815585	1.57567	0.110713	0.492909	0.1332	0.590888	0.124842	1.36334	0.0999625	1.46494	0.119302	80.7456	5.21033	0.219394	5	17	3.09266e-11	6.55953e-08
36100	CU987810	0	5	0	0.925632	0.0825861	2.00162	0.0210424	1.16465	0.0735014	1.26475	0.0503903	1.46468	0.0981561	1.50565	0.0630712	119.251	2.6943	0.0768178	5	17	1.27942e-12	2.95802e-09
2489	CU988181	0	5	0	1.20488	0.106261	1.73082	0.0537261	0.977944	0.0820997	0.91052	0.079027	1.52841	0.109391	1.70965	0.0762837	71.9058	2.59879	0.122881	5	17	7.89193e-11	1.62337e-07
6388	CU988530	PREDICTED: similar to coiled-coil domain containing 108 [Strongylocentrotus purpuratus]	5	0	0.804223	0.0710319	1.72648	0.0665421	0.862455	0.0906798	0.975016	0.0400577	1.39832	0.026268	1.58538	0.0348997	167.378	3.09829	0.0629365	5	17	7.76046e-14	1.88269e-10
35625	AM854817	(sp:Q95J53) BTB/POZ domain-containing protein 16 OS=Macaca fascicularis GN=BTBD16 PE=2 SV=1	5	male gonad	0.0986478	0.105813	1.23328	0.0769215	0.236737	0.107134	0.311697	0.0887366	0.46222	0.181254	0.543792	0.0559591	59.3142	3.21859	0.184496	5	17	3.69051e-10	7.14483e-07
5580	CU988970	0	5	0	1.01478	0.0459407	1.92999	0.158218	1.03442	0.135381	1.10783	0.0425516	1.70751	0.0745571	1.86901	0.0587005	77.7127	3.73252	0.163301	5	17	4.21627e-11	8.8626e-08
13766	CU989634	0	5	male gonad	0.939406	0.0236527	2.04799	0.114431	0.848392	0.0510862	1.00786	0.0511001	1.73949	0.039843	1.94063	0.057465	286.519	5.87419	0.0697064	5	17	8.88178e-16	2.19913e-12
28960	CU989658	(sp:Q9D180) Uncharacterized protein ENSP00000361571 homolog OS=Mus musculus PE=2 SV=2	5	0	1.36133	0.142692	2.23025	0.0514819	1.48046	0.0981079	1.42444	0.0805725	2.17358	0.0916587	2.22147	0.068249	82.8878	3.612	0.148162	5	17	2.50113e-11	5.34242e-08
42635	CU990254	(sp:Q9JLI7) Sperm-associated antigen 6 OS=Mus musculus GN=Spag6 PE=1 SV=1	5	0	0.610116	0.0628959	1.6843	0.0510943	0.775981	0.0430848	0.884417	0.027865	1.55435	0.0715428	1.70445	0.090805	262.901	4.83825	0.0625712	5	17	1.77636e-15	4.39115e-12
6802	CU990822	(sp:Q4R8T1) EF-hand calcium-binding domain-containing protein 6 (Fragment) OS=Macaca fascicularis GN=EFCAB6 PE=2 SV=2	5	0	0.32675	0.182394	1.46941	0.0374578	0.430059	0.157866	0.59575	0.0807793	0.792304	0.0701578	0.919516	0.0934515	49.482	3.4113	0.234397	5	17	1.55017e-09	2.7872e-06
23070	CU991208	0	5	0	0.976573	0.0497307	1.88363	0.0980089	0.952965	0.0524717	1.04008	0.131595	1.42656	0.160663	1.50615	0.0506809	60.0092	2.74946	0.155779	5	17	3.3633e-10	6.53826e-07
36513	CU991647	(sp:A7RHB3) UPF0732 protein v1g81173 OS=Nematostella vectensis GN=v1g81173 PE=3 SV=2	5	0	0.337166	0.185895	1.5361	0.138104	0.536097	0.0708184	0.665496	0.0627944	1.51346	0.0784422	1.701	0.050669	113.794	6.9539	0.207772	5	17	1.88038e-12	4.32112e-09
27228	CU991768	0	5	0	-0.305009	0.0103193	0.39705	0.0577547	-0.437771	0.103762	-0.383336	0.0971667	-0.211339	0.0364287	-0.259015	0.0604508	74.1729	1.84488	0.0845671	5	17	6.14457e-11	1.27623e-07
33392	CU991891	0	5	male gonad	0.731761	0.0710631	1.86186	0.0339552	0.638845	0.0354224	0.741243	0.0737924	1.51776	0.109481	1.62859	0.0863431	229.899	5.75063	0.0850467	5	17	5.55112e-15	1.36613e-11
18605	AM855219	(sp:A3KPP4) Solute carrier family 25 member 35 OS=Danio rerio GN=slc25a35 PE=3 SV=1	5	male gonad	0.244885	0.0586118	0.850986	0.0617296	0.11088	0.0405296	0.16151	0.0539026	0.926437	0.059795	1.14419	0.0663244	240.722	3.9457	0.0557297	5	17	3.77476e-15	9.30478e-12
36321	CU992276	0	5	0	-0.477746	0.0783732	0.54792	0.125617	-0.151476	0.154015	-0.00275765	0.124739	0.212872	0.261417	0.257618	0.170247	21.1213	2.52982	0.407237	5	17	9.54358e-07	0.000879918
17244	CU992617	(sp:Q0VFN8) Uncharacterized protein C9orf117 homolog OS=Xenopus tropicalis PE=2 SV=1	5	0	-0.291692	0.120461	0.705457	0.126602	-0.334709	0.177521	-0.251621	0.101853	0.261284	0.133712	0.57878	0.0874996	53.2763	4.32488	0.276006	5	17	8.65441e-10	1.59414e-06
21827	CU992930	(sp:Q9DAK2) Parkin coregulated gene protein homolog OS=Mus musculus GN=Pacrg PE=2 SV=1	5	0	1.0257	0.0688096	2.17731	0.069506	1.17219	0.0608516	1.14443	0.0559436	2.04838	0.145376	2.15604	0.0488156	208.748	6.05444	0.0986124	5	17	1.23235e-14	3.02295e-11
35924	CU993384	(sp:Q5JVL4) EF-hand domain-containing protein 1 OS=Homo sapiens GN=EFHC1 PE=1 SV=1	5	0	-0.490351	0.169013	0.551871	0.153499	-0.341666	0.0706467	-0.338535	0.0642402	0.320416	0.0438204	0.567011	0.0203548	84.1748	4.67464	0.188819	5	17	2.20715e-11	4.73874e-08
33043	CU993426	0	5	0	-0.227928	0.0987078	0.996464	0.0586443	0.030285	0.0461495	0.185991	0.0787671	0.739234	0.138182	1.03996	0.130859	124.859	5.6594	0.15411	5	17	8.7641e-13	2.04729e-09
24491	CU993685	0	5	male gonad	0.420781	0.165725	1.50097	0.183283	0.270346	0.0550611	0.336333	0.165233	0.868861	0.167135	0.925205	0.219077	31.7703	4.42939	0.474025	5	17	4.73879e-08	6.4258e-05
28710	CU993694	PREDICTED: similar to LOC129881 protein [Strongylocentrotus purpuratus]	5	0	0.652893	0.119246	1.88064	0.0542166	0.955781	0.0902304	1.09053	0.0596209	1.58269	0.10651	1.56096	0.082979	109.138	4.17006	0.129911	5	17	2.64966e-12	6.05712e-09
22800	CU993854	(sp:A6H8T2) Cancer susceptibility candidate protein 1 homolog OS=Danio rerio GN=casc1 PE=2 SV=2	5	0	1.0824	0.0590669	1.75173	0.0924994	1.11344	0.0305513	1.17771	0.0652963	1.71923	0.070935	1.91258	0.0600028	127.758	2.72765	0.0725906	5	17	7.25309e-13	1.70012e-09
33430	CU993862	0	5	male gonad	0.395071	0.0454677	1.4942	0.0374093	0.3516	0.0985234	0.486539	0.155765	0.822897	0.0577847	0.96363	0.184157	58.9996	3.83026	0.220728	5	17	3.85019e-10	7.42702e-07
38510	CU994336	(sp:Q9BZ19) Ankyrin repeat domain-containing protein 60 OS=Homo sapiens GN=ANKRD60 PE=2 SV=3	5	0	-0.798818	0.0889854	0.0671103	0.143536	-0.571382	0.074369	-0.70125	0.322135	-0.0880007	0.137536	-0.068302	0.264677	13.8963	2.7035	0.661463	5	17	1.69258e-05	0.00876758
17652	CU994347	0	5	0	0.905591	0.14082	1.56512	0.150308	1.11333	0.101352	1.11827	0.0734282	1.46062	0.0791067	1.71357	0.087037	31.4111	1.9355	0.209502	5	17	5.16328e-08	6.97042e-05
42266	CU994483	(sp:Q9CWP6) Motile sperm domain-containing protein 2 OS=Mus musculus GN=Mospd2 PE=1 SV=2	5	male gonad	0.584386	0.12768	1.50065	0.0503648	0.586462	0.112575	0.719849	0.0559208	1.50601	0.131605	1.70965	0.0716457	117.344	5.31346	0.153956	5	17	1.46083e-12	3.36722e-09
38634	CU994825	0	5	male gonad	0.467981	0.184797	1.91579	0.0483331	0.784933	0.078569	0.985545	0.182956	2.32353	0.0912072	2.43011	0.098146	167.423	13.489	0.273931	5	17	7.73825e-14	1.87807e-10
2768	CU995620	(sp:Q4V7N3) Serine/threonine/tyrosine-interacting protein A OS=Xenopus laevis GN=styx-A PE=2 SV=1	5	male gonad	1.10067	0.0995894	1.66567	0.0448524	0.879098	0.0925965	0.839	0.0709273	1.72541	0.0629084	1.90666	0.0278292	165.88	4.23687	0.0868421	5	17	8.35998e-14	2.02562e-10
2887	AM855648	0	5	male gonad	0.492177	0.0601471	1.59911	0.0749869	0.316224	0.104164	0.48293	0.0872572	0.641178	0.317647	0.616719	0.2042	35.0043	4.22116	0.410005	5	17	2.27043e-08	3.35115e-05
43637	CU995942	(sp:Q3V0B4) Coiled-coil domain-containing protein 108 OS=Mus musculus GN=Ccdc108 PE=1 SV=1	5	0	-0.28876	0.0866546	0.586584	0.0416694	-0.349006	0.0316924	-0.344952	0.0664781	0.0589687	0.131092	0.391334	0.0909683	108.552	3.29496	0.103203	5	17	2.76934e-12	6.31687e-09
19227	CU996446	PREDICTED: similar to Uncharacterized protein C18orf34 [Ciona intestinalis]	5	0	1.11419	0.0634963	1.92956	0.0894911	1.15924	0.128953	1.09541	0.0795941	1.755	0.0554326	1.93543	0.122122	74.1993	3.40227	0.155901	5	17	6.12698e-11	1.27319e-07
21007	AM855767	0	5	0	1.17823	0.10316	1.91715	0.0851099	1.1493	0.0790752	1.31079	0.0972306	1.4341	0.118431	1.39087	0.0544691	38.3382	1.55303	0.137729	5	17	1.13048e-08	1.77146e-05
35914	CU996829	0	5	0	-0.788005	0.135608	0.465638	0.112849	-0.438328	0.0279282	-0.291582	0.088902	0.275779	0.0259788	0.698245	0.0950601	152.27	6.62296	0.147883	5	17	1.69975e-13	4.0743e-10
35275	CU997201	(sp:Q9HAQ2) Kinesin-like protein KIF9 OS=Homo sapiens GN=KIF9 PE=1 SV=3	5	0	1.19572	0.115906	2.18064	0.0567754	1.26799	0.0764458	1.37182	0.0447928	1.92587	0.0905879	2.03009	0.071963	117.701	3.65122	0.105472	5	17	1.42486e-12	3.28715e-09
14453	CU997902	PREDICTED: similar to predicted protein [Ciona intestinalis]	5	0	-0.445544	0.125803	0.823512	0.157194	-0.209609	0.147549	-0.131761	0.0560218	0.117212	0.270032	-0.00414174	0.263118	23.3924	3.78312	0.549863	5	17	4.57619e-07	0.000475923
17509	CU998233	(sp:Q4R6T7) IQ and ubiquitin-like domain-containing protein OS=Macaca fascicularis GN=IQUB PE=2 SV=2	5	0	0.0254408	0.133645	1.06294	0.0695996	0.0896855	0.110236	0.269671	0.0558507	1.02274	0.0753073	1.15229	0.0660342	132.884	5.40733	0.138353	5	17	5.24358e-13	1.23486e-09
17420	CX068942	0	5	0	1.04519	0.0906614	1.94061	0.0707909	1.01926	0.0892503	1.06803	0.0433395	1.69705	0.106503	1.8298	0.0740343	115.659	3.68588	0.108353	5	17	1.64535e-12	3.78431e-09
27512	CX069089	0	5	male gonad	-0.374395	0.133062	0.582415	0.150558	-0.170563	0.0203664	-0.1909	0.0802394	0.533304	0.332117	0.927908	0.200321	38.8658	5.51742	0.482667	5	17	1.01749e-08	1.61068e-05
34080	DV736446	0	5	0	0.376491	0.193139	1.62697	0.0231924	0.525808	0.115511	0.682844	0.106952	0.889879	0.0529492	0.97768	0.107553	58.3077	3.91307	0.228176	5	17	4.22933e-10	8.09917e-07
24825	DV736477	hypothetical protein BRAFLDRAFT_269790 [Branchiostoma floridae]	5	0	0.802253	0.067399	1.66302	0.0497813	0.811228	0.086943	0.825333	0.057862	1.32862	0.0749433	1.53675	0.0634416	137.198	3.11082	0.0770913	5	17	4.02678e-13	9.53541e-10
13672	DV736642	0	5	0	1.5	0.09247	1.95784	0.0577165	1.42531	0.048359	1.2517	0.0271175	1.70893	0.0759328	1.82951	0.0784218	63.7919	1.40434	0.0748491	5	17	2.06401e-10	4.10325e-07
25927	DV736679	0	5	0	1.39886	0.0558865	1.7564	0.0226617	1.32824	0.103027	1.24155	0.0861309	1.76143	0.07189	1.97682	0.0813497	60.4782	1.69338	0.0951994	5	17	3.16085e-10	6.1763e-07
4522	DV736763	0	5	0	1.5808	0.0782465	2.4504	0.0375325	1.60942	0.0685301	1.65344	0.0719651	2.4195	0.0316834	2.49246	0.0194531	251.541	4.09587	0.0553626	5	17	2.55351e-15	6.30462e-12
3078	DV736885	0	5	0	1.3532	0.0203584	2.11945	0.0628348	1.3741	0.0839505	1.37269	0.113287	2.01712	0.0596729	2.27351	0.0933041	116.097	3.61851	0.105971	5	17	1.59495e-12	3.67157e-09
20920	DV736921	0	5	0	0.595317	0.0800358	1.34979	0.0831499	0.553483	0.0561273	0.615287	0.0425913	1.10987	0.0734143	1.34164	0.0402033	139.346	2.88856	0.07048	5	17	3.54161e-13	8.4007e-10
26163	DW714017	0	5	0	0.0284216	0.147895	1.21221	0.0979984	0.0996867	0.0393514	0.309997	0.118092	0.376195	0.1653	0.244475	0.236694	34.3342	3.67207	0.363633	5	17	2.63085e-08	3.82e-05
19555	EE677514	0	5	0	-0.559585	0.184291	1.64763	0.131932	-0.682736	0.341141	-0.142387	0.618602	1.90433	0.0926428	2.01631	0.0887428	63.5703	31.6363	1.69204	5	17	2.12228e-10	4.21273e-07
10095	EE677645	0	5	0	1.07561	0.0389393	1.7878	0.0823369	1.11414	0.0751107	1.13704	0.0635837	1.58907	0.0644998	1.73351	0.0717916	95.2779	2.17802	0.077723	5	17	8.05045e-12	1.77995e-08
29405	EE677784	(sp:Q5VTT2) Uncharacterized protein C9orf135 OS=Homo sapiens GN=C9orf135 PE=1 SV=1	5	0	-0.272641	0.0710702	0.270617	0.056793	-0.240372	0.0507435	-0.23499	0.0429392	0.055698	0.090392	0.27875	0.0786286	62.6781	1.34526	0.0729741	5	17	2.37628e-10	4.69078e-07
40770	ES789194	"(sp:O02414) Dynein light chain LC6, flagellar outer arm OS=Anthocidaris crassispina PE=3 SV=1"	5	0	0.426296	0.0586051	0.839091	0.0363896	0.564636	0.04869	0.562283	0.0500545	0.928954	0.0449412	1.15507	0.0713732	104.229	1.47842	0.0482266	5	17	3.86369e-12	8.73966e-09
1736	ES789298	0	5	male gonad	0.722522	0.0789465	1.5354	0.077892	0.386664	0.10563	0.375537	0.0314295	0.681859	0.106964	0.697362	0.206935	54.1669	3.57955	0.224685	5	17	7.59021e-10	1.41026e-06
1559	ES789786	(sp:Q5SSF7) Protein FAM46C OS=Mus musculus GN=Fam46c PE=2 SV=1	5	male gonad	0.498208	0.0967387	1.27527	0.0848111	0.310882	0.0527034	0.490541	0.0470875	0.549701	0.158398	0.422214	0.173708	39.4167	2.38055	0.205342	5	17	9.12797e-09	1.45682e-05
24471	ES789800	(sp:Q5T2S8) Armadillo repeat-containing protein 4 OS=Homo sapiens GN=ARMC4 PE=2 SV=1	5	0	0.492914	0.0789766	1.52789	0.0834871	0.403263	0.131296	0.447465	0.0446244	1.1665	0.0601823	1.41165	0.0863946	142.108	5.30598	0.126948	5	17	3.01092e-13	7.15998e-10
26592	AM856385	(sp:Q3S8M4) Elongation of very long chain fatty acids protein 4 OS=Macaca mulatta GN=ELOVL4 PE=3 SV=1	5	0	-1.34538	0.158552	-0.0572052	0.176	-0.96683	0.497941	-1.60366	0.323127	-0.346447	0.195109	-0.436065	0.116396	18.3279	7.23516	1.34219	5	17	2.59554e-06	0.00202452
41107	EW779489	0	5	male gonad	-0.486869	0.0474681	0.250399	0.0715646	-0.56942	0.0177423	-0.518815	0.0412069	-0.0546739	0.0691157	0.302578	0.0413498	250.879	3.16152	0.0428459	5	17	2.66454e-15	6.57607e-12
8464	EX956366	0	5	0	0.794124	0.0821138	1.76494	0.0831581	0.838801	0.179001	0.912004	0.061851	1.47118	0.110418	1.6318	0.0508522	70.3828	3.74099	0.180717	5	17	9.37656e-11	1.91375e-07
32788	FD483996	(sp:Q494V2) Coiled-coil domain-containing protein 37 OS=Homo sapiens GN=CCDC37 PE=1 SV=1	5	0	0.980621	0.0788252	2.02319	0.121612	1.06836	0.114594	1.19324	0.0468221	1.92698	0.0645721	2.03147	0.0703346	127.675	4.96285	0.132161	5	17	7.29195e-13	1.7085e-09
6609	FP001797	PREDICTED: similar to predicted protein [Ciona intestinalis]	5	0	1.28664	0.0688995	2.32682	0.0471763	1.30638	0.0593801	1.38782	0.053106	2.0623	0.0976316	2.2332	0.0710323	216.756	4.72768	0.0741576	5	17	8.99281e-15	2.20953e-11
35818	AM856684	0	5	0	0.784738	0.0475605	1.82763	0.0282057	0.953846	0.0785442	1.13384	0.0291111	1.61499	0.0648698	1.57719	0.047807	251.861	3.37015	0.0454953	5	17	2.55351e-15	6.30462e-12
30616	FP005565	0	5	0	0.426612	0.0755231	0.841353	0.082078	0.25474	0.0413301	0.198647	0.0929178	0.521227	0.193652	0.959511	0.10686	36.5737	1.91051	0.177607	5	17	1.6235e-08	2.46772e-05
37696	AM856886	(sp:Q0VFN8) Uncharacterized protein C9orf117 homolog OS=Xenopus tropicalis PE=2 SV=1	5	0	0.856485	0.0732322	1.85909	0.0694995	1.07291	0.117121	1.19916	0.0817154	1.53252	0.0323687	1.79404	0.0765746	99.9979	3.27787	0.11145	5	17	5.42355e-12	1.21433e-08
8430	FP006717	PREDICTED: similar to LOC495952 protein [Ciona intestinalis]	5	0	1.09518	0.0635817	1.74507	0.0733269	1.05586	0.0500884	1.13218	0.0618712	1.56017	0.0344258	1.73966	0.0257809	140.806	2.13832	0.0516333	5	17	3.24962e-13	7.71785e-10
14418	FP010022	0	5	male gonad	0.948348	0.093502	1.70253	0.0970428	0.949306	0.106473	0.698944	0.073028	0.999288	0.192909	1.05115	0.159269	30.4388	2.28305	0.255016	5	17	6.54205e-08	8.64205e-05
6755	FP011414	0	5	0	-0.405099	0.112005	2.00475	0.175508	-0.35952	0.303051	0.220688	0.772782	2.3838	0.06307	2.4967	0.0255788	56.1715	36.4629	2.20706	5	17	5.69005e-10	1.07257e-06
39849	AM857403	(sp:Q2IA00) Sperm flagellar protein 2 OS=Sus scrofa GN=SPEF2 PE=2 SV=1	5	0	0.38333	0.0938154	1.34869	0.0910685	0.492241	0.137358	0.685953	0.130464	1.1895	0.0606921	1.55768	0.0906964	83.2978	4.67922	0.190993	5	17	2.40298e-11	5.13997e-08
14531	FP089741	0	5	0	0.251171	0.113287	2.03333	0.0946246	0.177453	0.182134	0.598612	0.334982	2.2786	0.162805	2.29754	0.068105	121.401	20.297	0.568447	5	17	1.10445e-12	2.56674e-09
24396	FP089865	0	5	0	0.920699	0.208519	2.45338	0.0389319	0.983806	0.189322	1.26387	0.190681	2.49169	0.042958	2.50782	0.0350961	113.353	11.9681	0.358981	5	17	1.94134e-12	4.45731e-09
17253	AJ560757	(sp:Q9W734) Mothers against decapentaplegic homolog 6 OS=Gallus gallus GN=SMAD6 PE=2 SV=1	5	0	1.26326	0.0318442	1.78788	0.091786	1.29782	0.0406338	1.42671	0.0194401	1.53308	0.081162	1.66665	0.0399439	55.4695	0.8543	0.0523643	5	17	6.28725e-10	1.17697e-06
22736	AM858470	(sp:Q92038) Acyl-CoA desaturase OS=Cyprinus carpio PE=2 SV=2	5	0	-0.248011	0.0743423	0.344158	0.0513009	-0.0480179	0.0627057	-0.0433307	0.0929686	0.254201	0.0979743	0.3747	0.0605712	46.5767	1.26587	0.0924057	5	17	2.49263e-09	4.38702e-06
2205	AM855102	(sp:Q9DAK2) Parkin coregulated gene protein homolog OS=Mus musculus GN=Pacrg PE=2 SV=1	5	0	0.35114	0.11867	1.40945	0.0684338	0.570385	0.130734	0.525203	0.0868142	1.38122	0.0819	1.52601	0.0640236	119.098	5.4608	0.155894	5	17	1.29297e-12	2.98675e-09
3026	CU987302	(sp:Q9R1K9) Centrin-2 OS=Mus musculus GN=Cetn2 PE=1 SV=1	5	0	1.43404	0.0440118	1.86422	0.0822618	1.37646	0.0440236	1.32752	0.0178291	1.86783	0.12469	2.15495	0.0252408	115.807	2.24416	0.0658867	5	17	1.62803e-12	3.7461e-09
30039	AM855580	(sp:Q5R7A8) C-Myc-binding protein OS=Pongo abelii GN=MYCBP PE=3 SV=3	5	0	1.88051	0.0237055	2.34395	0.077109	1.94788	0.00917998	1.93851	0.0423968	2.44332	0.0251739	2.50015	0.0427804	162.645	1.52726	0.0319265	5	17	9.84768e-14	2.37723e-10
28996	AM858510	(sp:Q9H5F2) UPF0686 protein C11orf1 OS=Homo sapiens GN=C11orf1 PE=2 SV=1	5	0	1.19697	0.0968144	1.99695	0.0914539	1.19688	0.0719671	1.16941	0.0552581	1.25351	0.19366	1.2493	0.218251	23.6822	2.06047	0.295818	5	17	4.18485e-07	0.000438572
40314	AM860593	(sp:Q2TBS4) Uncharacterized protein C1orf88 homolog OS=Bos taurus PE=2 SV=1	5	0	0.263767	0.0762631	1.20259	0.130168	0.268058	0.0922217	0.37967	0.0494954	0.881644	0.0829687	1.12552	0.072964	97.1783	3.74086	0.130882	5	17	6.85163e-12	1.5238e-08
40126	AM864807	0	5	0	-0.753208	0.301834	1.81994	0.115227	-0.594984	0.186753	-0.116543	0.483899	1.90004	0.107584	1.96809	0.116644	96.2925	33.5385	1.18421	5	17	7.38354e-12	1.63988e-08
39394	AM857596	(sp:Q96M34) Uncharacterized protein C3orf30 OS=Homo sapiens GN=C3orf30 PE=2 SV=1	5	male gonad	0.110606	0.0759583	1.18037	0.0745074	0.269355	0.0868022	0.305617	0.0928881	0.597023	0.0500625	0.799716	0.0351784	118.213	3.17006	0.0911766	5	17	1.3749e-12	3.17327e-09
18533	AM853802	hypothetical protein IscW_ISCW013676 [Ixodes scapularis]	5	0	0.74723	0.086078	1.27403	0.076957	0.787928	0.0470351	0.97076	0.0869967	1.33648	0.0887227	1.52653	0.0725045	66.4342	1.97059	0.100852	5	17	1.49105e-10	2.99851e-07
32959	DV736572	(sp:P56597) Nucleoside diphosphate kinase homolog 5 OS=Homo sapiens GN=NME5 PE=1 SV=1	5	0	1.19723	0.0451744	2.35268	0.0652045	1.35699	0.0489937	1.45853	0.0588782	2.15118	0.0341594	2.33577	0.0493229	401.416	5.44392	0.0461101	5	17	0	0
44637	AM857837	(sp:A7MBF6) Uncharacterized protein C1orf228 homolog OS=Bos taurus PE=2 SV=1	5	0	1.10779	0.0723066	1.63954	0.194138	0.88465	0.123899	0.859426	0.0941993	1.3499	0.0579308	1.58971	0.0714256	35.2622	2.31739	0.223444	5	17	2.14672e-08	3.17929e-05
9912	ES789199	(sp:Q5F201) WD repeat-containing protein 16 OS=Mus musculus GN=Wdr16 PE=2 SV=1	5	0	0.982393	0.0626661	2.02406	0.100153	1.19226	0.0925553	1.20069	0.220033	2.19198	0.0831252	2.23388	0.153056	71.0227	6.20224	0.296914	5	17	8.71777e-11	1.7854e-07
15888	AM868795	(sp:Q6GQT0) Dual specificity protein phosphatase CDC14A OS=Mus musculus GN=Cdc14a PE=2 SV=2	5	0	1.5401	0.0734947	1.73628	0.0906617	1.41517	0.113637	1.3691	0.0460047	1.2825	0.0443767	1.27688	0.0447546	21.0729	0.594381	0.0959002	5	17	9.70115e-07	0.000889595
23299	AM857778	(sp:Q9Z0R4) Intersectin-1 OS=Mus musculus GN=Itsn1 PE=1 SV=1	5	male gonad	-0.0428586	0.0249699	0.735025	0.0434771	-0.162714	0.0983045	-0.272116	0.0763526	0.731545	0.221046	1.19881	0.18097	96.9504	7.12857	0.249995	5	17	6.9843e-12	1.55261e-08
1014	AM857793	0	5	0	0.663567	0.29042	1.5169	0.0963535	0.463798	0.126745	0.52556	0.0906257	1.09807	0.0893145	1.03238	0.10545	27.3336	3.24007	0.403028	5	17	1.46045e-07	0.000177153
26781	DV736502	0	5	0	0.844862	0.104734	1.85152	0.0488766	0.912738	0.136792	1.06104	0.0594526	2.00048	0.0596721	2.03051	0.138106	121.445	6.11354	0.171156	5	17	1.10123e-12	2.56036e-09
31151	AM862695	0	5	male gonad	-0.718458	0.0516893	1.40059	0.0993642	-0.298567	0.0562184	-0.23124	0.241587	1.32668	0.207693	1.54526	0.0779261	210.951	20.2699	0.326699	5	17	1.13243e-14	2.77898e-11
17212	AM857827	0	5	0	-0.0235052	0.0305914	0.588207	0.0532642	-0.0549236	0.0380821	-0.049757	0.0464716	0.0996766	0.0811141	0.0991501	0.0506926	94.6655	1.1977	0.0430165	5	17	8.48532e-12	1.87271e-08
33222	FP004754	0	5	0	0.460912	0.101753	1.03667	0.0683223	0.511208	0.0666901	0.672589	0.040289	0.830257	0.0519234	1.08582	0.060995	58.8307	1.38132	0.0798306	5	17	3.93912e-10	7.56705e-07
25829	AM867048	(sp:Q9UIX4) Potassium voltage-gated channel subfamily G member 1 OS=Homo sapiens GN=KCNG1 PE=2 SV=1	5	male gonad	-0.523234	0.0356072	1.06564	0.146408	-0.445257	0.0542806	-0.371058	0.249781	1.24394	0.158802	1.34012	0.0805151	163.144	16.0267	0.334005	5	17	9.59233e-14	2.31751e-10
14324	AM860858	(sp:Q3UFY4) Radial spoke head protein 3 homolog A OS=Mus musculus GN=Rsph3a PE=2 SV=1	5	0	0.303266	0.0424819	1.19625	0.045275	0.315187	0.105822	0.3307	0.0180561	1.12107	0.0560479	1.20221	0.059683	230.312	4.27468	0.0631053	5	17	5.44009e-15	1.33935e-11
17804	CU685144	(sp:P70414) Sodium/calcium exchanger 1 OS=Mus musculus GN=Slc8a1 PE=1 SV=1	5	0	0.15681	0.0841055	1.15429	0.0726341	-0.0159104	0.0763126	-0.118074	0.143234	0.808933	0.118563	1.12261	0.084205	135.883	6.61245	0.165453	5	17	4.36096e-13	1.03093e-09
41355	AM857430	(sp:Q0VC09) RIB43A-like with coiled-coils protein 1 OS=Bos taurus GN=RIBC1 PE=2 SV=1	5	0	-0.21542	0.185098	1.01	0.0625812	-0.0118908	0.209309	0.0617843	0.0425905	0.633323	0.0531764	0.848841	0.0646502	64.2749	5.09661	0.2696	5	17	1.9431e-10	3.87259e-07
5612	AM854419	(sp:Q96HV5) Transmembrane protein 41A OS=Homo sapiens GN=TMEM41A PE=2 SV=1	5	0	1.05653	0.0381824	1.35151	0.0571688	0.999159	0.0832311	0.96389	0.100726	1.41265	0.196867	1.58412	0.0861206	26.2508	1.27518	0.165161	5	17	1.96915e-07	0.000228027
20923	AM869170	0	5	0	-0.213521	0.144638	0.252321	0.0927494	-0.265103	0.0527808	-0.263683	0.120939	0.460333	0.0710312	0.70947	0.0645765	71.2335	3.42351	0.163405	5	17	8.51217e-11	1.74414e-07
18649	AM857935	(sp:Q66IS6) Bardet-Biedl syndrome 5 protein homolog OS=Xenopus laevis GN=bbs5 PE=2 SV=1	5	male gonad	1.21724	0.113118	1.87645	0.13269	1.15269	0.0626586	1.07045	0.0639292	1.60478	0.0606003	1.85897	0.0459193	68.931	2.61364	0.128917	5	17	1.10876e-10	2.24746e-07
27596	CU682555	(sp:Q4R7Y8) Uncharacterized protein C14orf45 homolog OS=Macaca fascicularis GN=QtsA-11302 PE=2 SV=2	5	0	-0.447805	0.0635488	0.0589343	0.0593043	-0.429383	0.0923579	-0.375223	0.0592568	-0.192488	0.0299262	-0.0325913	0.121452	30.0183	0.925566	0.104834	5	17	7.26209e-08	9.45524e-05
12170	AM859254	(sp:Q99932) Sperm-associated antigen 8 OS=Homo sapiens GN=SPAG8 PE=1 SV=2	5	0	1.21041	0.0513233	1.85603	0.102631	1.16073	0.0518534	1.23702	0.0749477	1.70361	0.0974986	1.87504	0.0939572	70.1086	2.26647	0.109915	5	17	9.67561e-11	1.96995e-07
31895	CU683637	0	5	0	0.691086	0.0397546	1.31702	0.0884593	0.814109	0.0563313	0.842253	0.0602451	1.33163	0.0967919	1.55971	0.0615809	105.748	2.44895	0.0787385	5	17	3.43203e-12	7.79071e-09
10205	CU987797	PREDICTED: similar to predicted protein [Ciona intestinalis]	5	0	0.537099	0.196948	1.87748	0.132963	0.819698	0.102134	0.999207	0.0562727	1.30448	0.100071	1.40205	0.110535	56.9793	4.47254	0.26688	5	17	5.07999e-10	9.6215e-07
29895	CU989416	PREDICTED: hypothetical protein [Strongylocentrotus purpuratus]	5	0	0.75756	0.102824	1.82111	0.0583435	0.841892	0.0596946	0.981375	0.159785	1.55707	0.0794843	1.68894	0.0300994	100.648	4.27952	0.144567	5	17	5.14377e-12	1.15375e-08
20605	AM862184	0	5	0	0.261349	0.0903939	0.57163	0.0585747	0.095169	0.0174723	0.00317266	0.0547857	0.338129	0.0600629	0.47351	0.0181375	60.5798	0.943057	0.0529284	5	17	3.11881e-10	6.09727e-07
5392	AM857589	0	5	0	-1.17915	0.294092	1.153	0.110375	-0.835884	0.103269	-0.476127	0.372721	1.17351	0.0917867	1.44328	0.180008	104.391	26.3691	0.858835	5	17	3.81484e-12	8.63679e-09
9805	ES789247	(sp:Q6SP97) Enkurin OS=Mus musculus GN=Enkur PE=1 SV=1	5	0	1.01467	0.0842056	2.20943	0.276062	1.31515	0.0876434	1.48246	0.0501514	2.2625	0.0371447	2.32841	0.0717735	70.2963	6.17586	0.298706	5	17	9.46975e-11	1.93088e-07
29218	EE677501	(sp:A7SMR0) Meiosis expressed gene 1 protein homolog OS=Nematostella vectensis GN=v1g237368 PE=3 SV=1	5	0	1.57228	0.112777	2.45573	0.0412535	1.55718	0.0753262	1.61769	0.0779258	2.48983	0.0429067	2.50726	0.0340466	185.613	4.6764	0.0856606	5	17	3.28626e-14	8.01848e-11
9371	AM855501	"(sp:Q26630) 33 kDa inner dynein arm light chain, axonemal OS=Strongylocentrotus purpuratus PE=1 SV=1"	5	0	1.38785	0.154466	2.3362	0.0651981	1.34424	0.091229	1.53388	0.116457	2.12839	0.07834	2.18185	0.141417	58.8922	3.84977	0.222257	5	17	3.90648e-10	7.51216e-07
33636	AM854208	"(sp:Q28G94) Dynein light chain 1, axonemal OS=Xenopus tropicalis GN=dnal1 PE=2 SV=1"	5	0	1.11938	0.0763047	1.85834	0.11466	1.13953	0.0392542	1.14666	0.0787702	1.8324	0.0356075	2.12121	0.0903606	126.095	3.97478	0.107176	5	17	8.08131e-13	1.89022e-09
39539	AM865207	(sp:Q9UPR5) Sodium/calcium exchanger 2 OS=Homo sapiens GN=SLC8A2 PE=2 SV=2	5	male gonad	0.381735	0.110693	1.22392	0.0979954	0.220861	0.0957402	0.266109	0.158819	1.30296	0.114899	1.45477	0.023365	110.067	6.37022	0.196779	5	17	2.4718e-12	5.66042e-09
43784	AM858229	(sp:Q4R642) T-complex-associated testis-expressed protein 1 OS=Macaca fascicularis GN=TCTE1 PE=2 SV=1	5	0	0.217133	0.143153	1.11467	0.0971893	0.328827	0.107021	0.46762	0.0573869	1.12681	0.0926135	1.3093	0.059912	91.7878	4.37285	0.161979	5	17	1.0914e-11	2.38799e-08
38663	CU682580	0	5	visceral ganglion	0.985526	0.0907368	1.60292	0.0569604	1.08844	0.0594297	1.08347	0.0966027	1.5939	0.0509541	1.72255	0.0727894	74.9185	2.07375	0.0941124	5	17	5.66802e-11	1.18178e-07
23296	AM857587	(sp:Q5JRC9) Protein FAM47A OS=Homo sapiens GN=FAM47A PE=1 SV=3	5	male gonad	-0.531358	0.157677	0.708582	0.0909888	-0.514812	0.107326	-0.378603	0.111691	0.31739	0.0940164	0.492605	0.115119	89.7977	6.04391	0.22884	5	17	1.30473e-11	2.83519e-08
43744	AM858918	(sp:Q9D3N2) EF-hand calcium-binding domain-containing protein 1 OS=Mus musculus GN=Efcab1 PE=2 SV=1	5	male gonad	0.996801	0.0927894	1.79082	0.0738005	1.01828	0.0443348	0.966112	0.0730463	2.29837	0.0182233	2.32607	0.0723197	339.642	8.0343	0.0804278	5	17	2.22045e-16	5.50671e-13
12778	AM857898	0	5	0	-0.390335	0.230074	2.17586	0.17175	-0.364032	0.437665	0.167951	0.948787	2.36716	0.0829445	2.50288	0.0321764	36.6058	38.1066	3.5394	5	17	1.61263e-08	2.4528e-05
36266	ES789239	(sp:Q9D9T8) EF-hand domain-containing protein 1 OS=Mus musculus GN=Efhc1 PE=1 SV=1	5	0	0.236675	0.0795782	1.39006	0.0405813	0.331661	0.0526961	0.444397	0.0624413	1.08071	0.059706	1.22525	0.0708725	256.257	4.98679	0.0661643	5	17	2.22045e-15	5.4845e-12
12036	ES789955	(sp:A6NL82) Protein FAM183A OS=Homo sapiens GN=FAM183A PE=2 SV=2	5	0	0.99389	0.195894	2.07779	0.0697023	1.0305	0.0499817	1.13951	0.0371814	1.95901	0.096294	2.08198	0.0348439	119.11	5.72877	0.163528	5	17	1.29197e-12	2.98573e-09
33725	DV736486	(sp:Q2TA38) Tektin-4 OS=Bos taurus GN=TEKT4 PE=2 SV=1	5	0	1.46122	0.0826786	2.4569	0.041299	1.62118	0.0790655	1.7175	0.0113014	2.40183	0.06741	2.41249	0.0816074	186.687	4.0538	0.0738288	5	17	3.13083e-14	7.64548e-11
30482	AM853323	(sp:O15990) Arginine kinase OS=Liolophura japonica PE=2 SV=1	5	male gonad	1.1277	0.0686055	2.0572	0.02705	0.93898	0.0968952	0.947815	0.151583	2.15361	0.126327	2.35559	0.0544287	184.387	8.36343	0.154218	5	17	3.475e-14	8.47552e-11
43638	AM858256	(sp:Q8NHP6) Motile sperm domain-containing protein 2 OS=Homo sapiens GN=MOSPD2 PE=1 SV=1	5	male gonad	0.2416	0.0995946	1.03764	0.0871878	0.274626	0.136581	0.251678	0.0500057	1.01299	0.0994688	1.25473	0.0857196	93.042	4.31985	0.157859	5	17	9.77107e-12	2.14182e-08
38753	CU983935	(sp:Q567I9) Cytochrome b5 domain-containing protein 1 OS=Danio rerio GN=cyb5d1 PE=2 SV=1	5	0	1.22956	0.034374	2.0771	0.0732519	1.32899	0.0148061	1.3956	0.0482435	1.92244	0.0531431	2.22672	0.042618	321.539	3.62956	0.0383795	5	17	3.33067e-16	8.25673e-13
34614	BQ426960	(sp:A1A5Q4) UPF0704 protein C6orf165 homolog OS=Rattus norvegicus PE=2 SV=1	5	0	1.42113	0.0854711	2.21728	0.0440996	1.44556	0.0697428	1.52579	0.0386179	2.10868	0.0751656	2.23832	0.0441448	166.054	3.12389	0.0639625	5	17	8.28226e-14	2.00762e-10
27379	AM858517	(sp:B0WYR6) WD repeat-containing protein on Y chromosome OS=Culex quinquefasciatus GN=WDY PE=4 SV=2	5	0	-0.0406866	0.0577668	0.640641	0.0792871	-0.0969285	0.0852058	-0.0740385	0.0426763	-0.0911392	0.0359905	-0.0678741	0.0673775	79.5202	1.69154	0.072324	5	17	3.50046e-11	7.39996e-08
9457	CX068887	0	5	0	1.4653	0.036726	1.80385	0.0446098	1.34126	0.027955	1.3916	0.0445905	1.66968	0.100451	1.84343	0.0580847	64.6488	0.924634	0.0486283	5	17	1.85491e-10	3.71168e-07
3850	AM868587	"(sp:P14100) Calcium/calmodulin-dependent 3',5'-cyclic nucleotide phosphodiesterase 1A OS=Bos taurus GN=PDE1A PE=1 SV=3"	5	male gonad	0.0239195	0.0808716	1.72322	0.0436699	0.0623262	0.0571592	0.348757	0.271437	1.85196	0.0876222	1.97148	0.0584197	205.516	17.0319	0.281771	5	17	1.40998e-14	3.45587e-11
3284	AM854073	(sp:Q4G0U5) Uncharacterized protein MGC33657 OS=Homo sapiens PE=2 SV=1	5	0	-0.0526324	0.0245874	0.668908	0.0854928	-0.0947545	0.07694	-0.0682485	0.0669871	0.4282	0.110773	0.669798	0.114563	78.6235	2.74899	0.118877	5	17	3.837e-11	8.09606e-08
28170	CU989003	(sp:Q50JE5) Angiotensin-converting enzyme OS=Mesocricetus auratus GN=Ace PE=2 SV=1	5	0	1.66136	0.169592	2.31195	0.0795258	1.61602	0.188016	1.62209	0.110756	2.48953	0.0405648	2.50584	0.0377036	49.8231	3.74646	0.255664	5	17	1.46857e-09	2.64637e-06
20178	AM863859	0	5	0	1.72873	0.019843	2.22861	0.0792395	1.77652	0.0478135	1.82152	0.029377	1.88203	0.0201652	1.86847	0.036527	62.9045	0.634249	0.0342813	5	17	2.30876e-10	4.56903e-07
4860	EE677431	0	5	0	0.967174	0.0763376	1.79282	0.104865	1.00682	0.00892392	1.11663	0.0538486	1.10045	0.1394	0.815194	0.322543	19.2488	2.32331	0.410377	5	17	1.84197e-06	0.00153988
7215	CU684909	"(sp:Q8TD57) Dynein heavy chain 3, axonemal OS=Homo sapiens GN=DNAH3 PE=2 SV=1"	5	0	0.635328	0.0195346	1.53533	0.054754	0.508281	0.100223	0.568876	0.0424097	0.985191	0.10663	1.07722	0.172129	66.7049	3.08596	0.157294	5	17	1.44321e-10	2.90518e-07
10897	FP089825	PREDICTED: similar to LOC733372 protein [Taeniopygia guttata]	5	0	0.925249	0.0843028	1.71863	0.0718344	0.777965	0.102378	0.834733	0.0466953	1.36562	0.093614	1.5253	0.0635765	101.683	3.12345	0.10444	5	17	4.73077e-12	1.0649e-08
28975	AM857083	(sp:A4IFD0) Adenylate kinase isoenzyme 5 OS=Bos taurus GN=Ak5 PE=2 SV=1	5	0	0.757669	0.140958	1.76215	0.0661891	0.738271	0.0356854	0.936411	0.134158	1.3028	0.0432044	1.53132	0.0204912	90.8236	3.62116	0.135559	5	17	1.18946e-11	2.59778e-08
9588	AM858736	(sp:Q5JVL4) EF-hand domain-containing protein 1 OS=Homo sapiens GN=EFHC1 PE=1 SV=1	5	0	1.27852	0.0676649	2.41451	0.0429357	1.43733	0.0889974	1.59306	0.0571636	2.21379	0.0636147	2.31254	0.0216971	260.538	4.77677	0.0623366	5	17	1.88738e-15	4.66371e-12
28163	AM861826	(sp:Q4V7T8) Ropporin-1-like protein OS=Xenopus laevis GN=ropn1l PE=2 SV=1	5	0	1.50721	0.0359433	2.4565	0.0414881	1.49237	0.088567	1.51188	0.0548552	2.47834	0.0382131	2.50524	0.0373879	382.246	5.47659	0.0487132	5	17	1.11022e-16	2.75446e-13
19877	ES789943	(sp:Q80Y75) DnaJ homolog subfamily B member 13 OS=Mus musculus GN=Dnajb13 PE=2 SV=1	5	0	0.759449	0.13736	2.0243	0.0665894	1.00352	0.0997223	1.16095	0.0444523	1.89009	0.159484	2.04746	0.0898559	119.687	6.36315	0.18076	5	17	1.24156e-12	2.87422e-09
42402	ES789182	(sp:A2BFC9) Uncharacterized protein FLJ46082 homolog OS=Danio rerio GN=si:ch211-215c18.4 PE=4 SV=1	5	0	0.553072	0.162769	2.06138	0.0841733	0.822576	0.122604	1.01219	0.0779365	1.83012	0.094881	1.9661	0.0416177	151.488	8.3432	0.187255	5	17	1.77414e-13	4.24906e-10
30722	ES789166	(sp:B5X5D0) UPF0691 protein C9orf116 homolog OS=Salmo salar PE=2 SV=1	5	0	1.33831	0.0819168	2.3039	0.0956881	1.30473	0.0461179	1.42031	0.0703329	2.08897	0.0626814	2.15441	0.0336282	175.43	4.13142	0.0800709	5	17	5.25135e-14	1.27818e-10
39639	EE677599	(sp:O43805) Sjoegren syndrome nuclear autoantigen 1 OS=Homo sapiens GN=SSNA1 PE=1 SV=2	5	0	1.19563	0.0521763	1.86489	0.0420092	1.36196	0.0840581	1.48836	0.0375294	1.95555	0.104183	2.12713	0.0477053	133.004	2.63739	0.0674197	5	17	5.20473e-13	1.22675e-09
6590	AM858874	0	5	0	-0.964451	0.403495	1.47754	0.121411	-0.996128	0.18278	-0.579242	0.547025	1.47859	0.102321	1.58032	0.149749	68.2004	32.4713	1.61879	5	17	1.20788e-10	2.44234e-07
31949	AM858908	0	5	0	0.513682	0.0881365	1.08753	0.107169	0.584046	0.0576703	0.665233	0.0438013	0.70279	0.0555691	0.621501	0.117179	23.1355	0.822406	0.120861	5	17	4.95755e-07	0.000508149
17384	AM859590	(sp:Q9UHP6) Rhabdoid tumor deletion region protein 1 OS=Homo sapiens GN=RTDR1 PE=2 SV=1	5	0	0.620987	0.0243208	1.55358	0.0836857	0.752417	0.088213	0.715091	0.107119	1.13172	0.127758	1.33019	0.136782	57.3263	2.85492	0.169324	5	17	4.84067e-10	9.19727e-07
40878	CU987413	(sp:Q28FE4) MORN repeat-containing protein 5 OS=Xenopus tropicalis GN=morn5 PE=2 SV=1	5	male gonad	1.32021	0.1434	2.10429	0.0994835	1.32235	0.0437361	1.15984	0.0369575	1.71133	0.0379746	2.03048	0.0324038	101.184	3.19181	0.107252	5	17	4.92506e-12	1.10715e-08
8001	AM858986	0	5	0	-0.713072	0.120539	1.68105	0.0685972	-0.528686	0.163599	-0.019429	0.420797	1.70027	0.169852	1.95114	0.0388232	135.312	29.1092	0.73143	5	17	4.51528e-13	1.06696e-09
31625	CU684060	"PREDICTED: Pan troglodytes hypothetical protein LOC452271 (LOC452271), mRNA"	5	0	1.10278	0.0862722	1.8322	0.0902482	0.93259	0.0941209	0.994209	0.0452468	1.57127	0.117966	1.66293	0.0504835	86.1821	2.91394	0.114959	5	17	1.82263e-11	3.93324e-08
24895	AM867706	PREDICTED: similar to UPF0542 protein FLJ76405 homolog [Ciona intestinalis]	5	0	1.03377	0.0678849	1.42612	0.0799385	0.987866	0.0898393	0.94085	0.0931761	1.31598	0.126445	1.64887	0.0685343	42.0444	1.59919	0.129322	5	17	5.53829e-09	9.14926e-06
1001	CU992728	0	5	0	0.694005	0.101544	1.86049	0.111185	0.90387	0.122073	1.0079	0.106204	1.60635	0.0562051	1.62507	0.0491731	92.9213	4.37644	0.160135	5	17	9.8751e-12	2.16363e-08
25361	AM863619	0	5	0	1.29794	0.0685706	1.84174	0.0716092	1.37599	0.129558	1.3086	0.0413848	1.99224	0.0894633	2.13939	0.0514134	84.8498	2.7182	0.10892	5	17	2.06856e-11	4.45153e-08
40588	AM859108	0	5	male gonad	0.261661	0.0515785	1.69784	0.191738	0.545076	0.188907	0.670919	0.111682	1.49222	0.241695	1.78723	0.0906924	71.6462	8.51866	0.404257	5	17	8.12529e-11	1.66812e-07
40542	CU994265	0	5	0	1.08949	0.0422349	1.53793	0.13771	1.15213	0.0617511	1.21899	0.120977	1.54238	0.0364827	1.84125	0.0502052	44.5898	1.67622	0.127813	5	17	3.50478e-09	6.02472e-06
40111	CX739466	(sp:Q2T9V2) IQ domain-containing protein G OS=Bos taurus GN=IQCG PE=2 SV=1	5	0	-0.814219	0.0316505	-0.13418	0.0746278	-0.873085	0.0614609	-0.80345	0.0785339	-0.485372	0.0605582	-0.159864	0.0814245	100.379	2.26658	0.0767727	5	17	5.25735e-12	1.1787e-08
32916	AM859132	(sp:Q4R6X9) Leucine-rich repeat-containing protein 48 OS=Macaca fascicularis GN=LRRC48 PE=2 SV=1	5	0	1.13432	0.0731516	2.02924	0.0898648	1.18181	0.113441	1.27715	0.0480085	2.16281	0.131954	2.29255	0.122765	112.977	5.51059	0.165839	5	17	1.99507e-12	4.57869e-09
5880	AM859143	0	5	0	0.717079	0.0566815	1.3286	0.11764	0.48802	0.0294192	0.400816	0.0441642	0.720911	0.0517619	0.99118	0.0428356	112.154	2.32445	0.0704668	5	17	2.11853e-12	4.85778e-09
21525	AM856706	(sp:Q53HC0) Coiled-coil domain-containing protein 92 OS=Homo sapiens GN=CCDC92 PE=2 SV=2	5	male gonad	0.502711	0.0566041	1.10857	0.0761903	0.320577	0.0784491	0.178645	0.0556044	0.584055	0.146583	0.708935	0.120251	51.0133	2.11734	0.141119	5	17	1.21933e-09	2.21308e-06
241	AM859302	(sp:Q9UG01) Intraflagellar transport protein 172 homolog OS=Homo sapiens GN=IFT172 PE=1 SV=2	5	0	0.660945	0.0618862	1.2424	0.0587823	0.59639	0.0827989	0.607133	0.101279	1.11801	0.0641263	1.2216	0.0529142	74.4052	1.9656	0.0898194	5	17	5.99142e-11	1.24741e-07
29061	AM859337	(sp:P0C5J2) B9 domain-containing protein 1 OS=Rattus norvegicus GN=B9d1 PE=2 SV=1	5	0	0.542641	0.0756232	0.978648	0.0587132	0.64319	0.0891014	0.734302	0.0348354	1.02309	0.057539	1.24374	0.122228	44.047	1.37837	0.106396	5	17	3.8561e-09	6.5708e-06
26946	AM859436	0	5	0	0.396932	0.118815	1.03841	0.109512	0.253749	0.0766123	0.383877	0.0554664	0.799323	0.0821834	1.06665	0.0707961	64.389	2.53224	0.133712	5	17	1.91568e-10	3.82562e-07
45080	AM859492	0	5	0	-0.0229855	0.228145	2.06817	0.0549664	0.00396791	0.181733	0.583295	0.575636	2.347	0.223998	2.50224	0.0348515	67.3108	26.9711	1.36236	5	17	1.34218e-10	2.70852e-07
31839	AM859555	(sp:Q86RN8) Paramyosin OS=Boophilus microplus GN=PRM PE=1 SV=1	5	0	-0.326657	0.12963	2.1461	0.0446647	-0.304978	0.233048	0.216642	0.466564	2.20151	0.0756583	2.27881	0.0603899	123.221	32.4276	0.894765	5	17	9.77107e-13	2.27861e-09
39956	AM860025	(sp:Q7TSV9) Uncharacterized protein C16orf48 homolog OS=Mus musculus PE=2 SV=1	5	0	0.358062	0.164543	1.24161	0.111592	0.365824	0.26473	0.34166	0.0693216	1.28944	0.197124	1.24918	0.167183	31.5026	4.6773	0.50481	5	17	5.05134e-08	6.8294e-05
18645	AM860112	(sp:A9JS51) UPF0605 protein FAM166B OS=Xenopus laevis GN=fam166b PE=2 SV=1	5	male gonad	-1.1608	0.0493395	0.788369	0.106557	-0.843365	0.227914	-0.815512	0.0894923	-0.223779	0.38433	-0.352726	0.334411	37.9008	9.49903	0.852138	5	17	1.23483e-08	1.92139e-05
44749	AM860242	0	5	0	-1.02596	0.296324	1.30016	0.300405	-1.08657	0.241976	-0.337241	0.663084	1.72757	0.230584	1.8009	0.0986764	55.6702	35.439	2.1644	5	17	6.10962e-10	1.14494e-06
3923	AM860311	(sp:Q9JLI7) Sperm-associated antigen 6 OS=Mus musculus GN=Spag6 PE=1 SV=1	5	0	-0.331402	0.0327738	0.446704	0.0725458	-0.242857	0.050631	-0.181578	0.0626179	0.377169	0.0762446	0.461928	0.118427	101.577	2.75352	0.0921659	5	17	4.77107e-12	1.07349e-08
13754	AM860434	0	5	0	0.402778	0.116059	1.63427	0.0733394	0.730878	0.0975427	0.910376	0.0717926	1.68359	0.0759654	1.71574	0.0805335	161.196	6.23684	0.131549	5	17	1.06026e-13	2.55841e-10
40954	AM860707	0	5	0	0.820866	0.17038	1.91007	0.117295	0.701167	0.0945906	0.691493	0.132149	1.7746	0.149721	1.91878	0.0667478	96.229	7.52266	0.265794	5	17	7.42351e-12	1.64802e-08
40624	AM860880	0	5	male gonad	-0.357597	0.0292745	0.736958	0.0422834	-0.202269	0.0222715	-0.160232	0.132518	0.915384	0.141047	1.02001	0.106638	188.976	7.55957	0.136009	5	17	2.83107e-14	6.9163e-11
38374	AM860940	(sp:Q9D722) Uncharacterized protein C20orf111 homolog OS=Mus musculus PE=2 SV=1	5	0	0.619552	0.0780478	1.06538	0.138582	0.594711	0.0703025	0.681586	0.0910431	0.887501	0.0784056	1.02622	0.0540986	21.4543	0.862324	0.136658	5	17	8.53409e-07	0.000809885
24496	AM861730	(sp:Q8CDU5) EF-hand domain-containing family member B OS=Mus musculus GN=Efhb PE=2 SV=1	5	0	0.332963	0.0669692	1.3978	0.117836	0.392165	0.120353	0.431158	0.077812	1.03534	0.075411	1.19849	0.102057	91.946	4.30928	0.15935	5	17	1.07619e-11	2.35579e-08
1417	AM861850	0	5	male gonad	-0.954459	0.0665232	1.22244	0.0869718	-0.976946	0.19499	-0.580624	0.409286	1.26013	0.0825443	1.4266	0.0382986	136.271	26.8775	0.670604	5	17	4.25882e-13	1.00721e-09
4603	AM861884	(sp:A3KMX7) Putative malate dehydrogenase 1B OS=Bos taurus GN=MDH1B PE=2 SV=1	5	0	0.13835	0.0557834	0.905143	0.167525	0.0532178	0.0658919	-0.0436594	0.0878303	0.772046	0.0618747	0.945573	0.0408501	98.2816	4.11511	0.14236	5	17	6.248e-12	1.39393e-08
5540	AM861891	0	5	0	0.311642	0.0796156	2.40935	0.0774221	0.262396	0.103025	0.651728	0.625407	2.48802	0.0409119	2.50739	0.0337647	67.1962	24.6849	1.24901	5	17	1.36067e-10	2.7431e-07
30706	AM862121	0	5	0	-1.26626	0.279532	1.12444	0.0953353	-1.16271	0.224228	-0.574386	0.499567	1.41172	0.0826462	1.49293	0.057921	94.0507	32.7778	1.18494	5	17	8.94851e-12	1.96867e-08
43482	AM862123	0	5	male gonad	0.439924	0.0846476	1.16018	0.0833453	0.510055	0.147091	0.509411	0.0442362	0.772285	0.113303	0.71094	0.138825	24.4556	1.41415	0.196605	5	17	3.3114e-07	0.000360612
38517	AM862455	(sp:A9JS51) UPF0605 protein FAM166B OS=Xenopus laevis GN=fam166b PE=2 SV=1	5	0	-0.188108	0.110471	0.597063	0.0467768	-0.207344	0.0931321	-0.177949	0.0807768	0.575727	0.0481126	0.743871	0.0662098	129.975	4.07325	0.106552	5	17	6.29385e-13	1.47906e-09
14961	AM862462	0	5	male gonad	-0.935691	0.191187	0.987945	0.223525	-1.12474	0.0740625	-0.851948	0.264558	0.437496	0.261101	0.909169	0.138703	94.6032	18.9217	0.680039	5	17	8.53106e-12	1.88025e-08
36269	AM862529	0	5	male gonad	-0.495118	0.0501394	0.770272	0.0238678	-0.295461	0.0185319	-0.335971	0.0990995	-0.0860983	0.242442	-0.103965	0.191993	51.1289	4.02841	0.267883	5	17	1.19776e-09	2.17752e-06
15790	AM862591	predicted protein [Nematostella vectensis]	5	0	-0.0631742	0.10021	2.09543	0.0762543	-0.301275	0.0983619	0.042013	0.390078	1.94809	0.124825	2.04079	0.0785438	155.417	26.638	0.582748	5	17	1.43552e-13	3.44811e-10
33955	AM862765	(sp:Q9Z1K5) Protein ariadne-1 homolog OS=Mus musculus GN=Arih1 PE=2 SV=3	5	male gonad	1.06005	0.070227	1.54921	0.0873201	1.05836	0.0608626	1.08327	0.0424574	1.3903	0.0955102	1.57835	0.0192466	56.7308	1.22716	0.0735462	5	17	5.2595e-10	9.95098e-07
5064	AJ565739	(sp:Q9ESN6) Tripartite motif-containing protein 2 OS=Mus musculus GN=Trim2 PE=1 SV=1	5	0	0.468199	0.110403	1.22925	0.0818451	0.455735	0.0952594	0.503906	0.0833384	0.654934	0.07482	0.811802	0.0778492	45.1559	1.78099	0.134099	5	17	3.17602e-09	5.50088e-06
42227	AM863647	0	5	0	-1.04654	0.114494	0.885099	0.152944	-0.807116	0.134996	-0.667859	0.10594	-0.20603	0.319686	-0.208762	0.371481	39.2569	9.42439	0.816238	5	17	9.4187e-09	1.5004e-05
17475	AM864034	(sp:Q95230) Sperm surface protein Sp17 OS=Papio hamadryas GN=SPA17 PE=2 SV=1	5	0	0.755624	0.0321503	1.78883	0.0640684	0.69957	0.1152	0.719958	0.047597	1.69154	0.0645693	1.83654	0.0637636	264.63	6.42589	0.0825606	5	17	1.66533e-15	4.11837e-12
5109	AM864088	0	5	male gonad	-0.706091	0.150908	0.956201	0.0915759	-0.87697	0.217845	-0.733605	0.106365	-0.136139	0.0405628	0.00129164	0.19304	83.4885	9.4507	0.384872	5	17	2.35879e-11	5.05017e-08
27335	AM864142	hypothetical protein BRAFLDRAFT_117676 [Branchiostoma floridae]	5	male gonad	0.236599	0.0683127	1.32686	0.14049	0.193838	0.0418515	0.221036	0.0701347	1.05647	0.126357	1.27788	0.0492132	156.36	6.08981	0.132421	5	17	1.36446e-13	3.28017e-10
13065	AM864531	(sp:B4MXW3) Kelch-like protein diablo OS=Drosophila willistoni GN=dbo PE=3 SV=1	5	0	0.0767774	0.140615	2.10341	0.0597633	-0.216643	0.210628	0.02466	0.449597	1.92138	0.0938574	1.97941	0.0754313	97.8976	24.3082	0.844226	5	17	6.45106e-12	1.43794e-08
4195	AM864563	(sp:Q63ZR7) Solute carrier family 25 member 46-B OS=Xenopus laevis GN=slc25a46-B PE=2 SV=1	5	male gonad	-0.0322311	0.171687	0.711307	0.105532	-0.107254	0.082164	-0.104097	0.0643073	0.727055	0.093059	0.90842	0.144663	64.2863	4.43579	0.234602	5	17	1.94032e-10	3.869e-07
41308	AM864669	(sp:Q6NZQ0) Coiled-coil domain-containing protein C16orf93 homolog OS=Mus musculus GN=Gm166 PE=2 SV=2	5	0	-0.229941	0.0681176	0.596769	0.109548	-0.0699189	0.154269	0.017801	0.153257	0.572809	0.0457113	0.826404	0.0610038	60.0247	3.65666	0.207126	5	17	3.35639e-10	6.52819e-07
44022	AM864833	(sp:Q99NH0) Ankyrin repeat domain-containing protein 17 OS=Mus musculus GN=Ankrd17 PE=1 SV=2	5	male gonad	0.428645	0.0469136	1.28835	0.0869648	0.369582	0.0988165	0.311306	0.0957003	0.945611	0.166251	1.12273	0.138647	61.2789	3.58679	0.199009	5	17	2.84592e-10	5.58654e-07
2552	AM864856	0	5	0	-0.902505	0.219644	0.904167	0.0738238	-0.783369	0.167957	-0.652049	0.138769	-0.222609	0.409478	-0.0730622	0.351826	29.9709	8.9046	1.01017	5	17	7.34862e-08	9.52381e-05
34019	AM864858	0	5	0	-0.019166	0.037959	0.728416	0.0980925	-0.0585592	0.109423	-0.00223023	0.103688	0.136049	0.0900838	0.267966	0.0598448	46.5938	1.75874	0.128337	5	17	2.48546e-09	4.3769e-06
38854	AM864903	(sp:Q96M60) Uncharacterized protein C15orf33 OS=Homo sapiens GN=C15orf33 PE=2 SV=2	5	male gonad	-0.0332665	0.0561619	0.490876	0.0727815	-0.0173479	0.0924548	-0.085678	0.118338	0.0971717	0.0870738	0.208709	0.102114	22.4267	0.919856	0.139455	5	17	6.20707e-07	0.000618224
11800	AM853671	0	5	male gonad	-0.179526	0.0357943	0.547281	0.0455882	-0.299404	0.0684804	-0.268781	0.0799577	0.277765	0.0825659	0.499156	0.105771	113.57	3.02376	0.0905236	5	17	1.91103e-12	4.38963e-09
1721	AM865116	(sp:Q9Z1K5) Protein ariadne-1 homolog OS=Mus musculus GN=Arih1 PE=2 SV=3	5	male gonad	0.875221	0.0498066	1.32943	0.0689487	0.821542	0.0193088	0.829286	0.0260891	1.09338	0.0861665	1.33211	0.0496222	83.8454	1.16152	0.0471006	5	17	2.27853e-11	4.88517e-08
15933	AM865188	0	5	male gonad	-0.52415	0.0810555	0.988894	0.0652748	-0.707445	0.0754023	-0.845469	0.0456297	0.0259245	0.54672	0.0342452	0.426994	25.8674	9.13401	1.20057	5	17	2.19458e-07	0.000251718
25199	AM865302	0	5	male gonad	-1.05286	0.199234	1.30387	0.079853	-1.20337	0.381332	-0.676392	0.747046	1.51645	0.0599548	1.65197	0.0685637	53.5238	35.7347	2.26998	5	17	8.34282e-10	1.54509e-06
20499	AM865983	(sp:O02485) Uncharacterized protein ZK1073.1 OS=Caenorhabditis elegans GN=ZK1073.1 PE=2 SV=1	5	0	0.402755	0.0617188	1.16127	0.0719689	0.914011	0.104211	1.04458	0.117872	1.36475	0.0328331	1.43183	0.0800991	74.228	2.67725	0.122631	5	17	6.10789e-11	1.26983e-07
37552	AM865988	0	5	0	-0.596046	0.0921257	1.75606	0.0714129	-0.49201	0.119569	-0.619265	0.218114	0.657222	0.51297	0.657761	0.304564	60.3007	18.284	1.03093	5	17	3.23585e-10	6.30667e-07
32265	AM866114	(sp:Q8IWZ6) Bardet-Biedl syndrome 7 protein OS=Homo sapiens GN=BBS7 PE=1 SV=2	5	0	0.557235	0.0376085	0.986871	0.0984901	0.413511	0.0196402	0.264278	0.0617936	0.692145	0.0406822	1.00314	0.0605236	102.204	1.8113	0.0602561	5	17	4.53682e-12	1.0226e-08
33107	AM866556	0	5	0	-0.924808	0.148305	1.57213	0.100547	-0.712583	0.330928	-0.124751	0.74755	2.05092	0.306195	1.94951	0.333026	46.2446	35.657	2.62157	5	17	2.63623e-09	4.62658e-06
34370	AM866620	(sp:Q8CCB4) Vacuolar protein sorting-associated protein 53 homolog OS=Mus musculus GN=Vps53 PE=2 SV=1	5	male gonad	0.41905	0.166886	0.878696	0.089008	0.465171	0.09747	0.512864	0.0690625	0.783358	0.0469715	0.980672	0.0598263	22.9836	1.11727	0.16528	5	17	5.19955e-07	0.000531914
15029	AM866836	(sp:Q6DGU5) Solute carrier family 25 member 46 OS=Danio rerio GN=slc25a46 PE=2 SV=1	5	male gonad	0.382488	0.144658	0.938729	0.111843	0.300327	0.0976976	0.275077	0.0463637	0.998402	0.157523	1.15211	0.104015	47.5463	3.04117	0.217472	5	17	2.12095e-09	3.7668e-06
11973	AM866946	(sp:Q5PPV3) MORN repeat-containing protein 3 OS=Xenopus laevis GN=morn3 PE=2 SV=1	5	male gonad	0.723093	0.185799	1.58714	0.113457	0.68528	0.0878373	0.740683	0.0346961	1.10013	0.0826176	1.23452	0.0993447	41.6504	2.59945	0.212198	5	17	5.95817e-09	9.77736e-06
41946	AM867219	(sp:Q5XIE5) E3 ubiquitin-protein ligase MARCH3 OS=Rattus norvegicus GN=March3 PE=1 SV=1	5	male gonad	-0.281981	0.0765403	1.87094	0.124036	-0.0557366	0.0825983	0.285709	0.432288	2.0295	0.215554	2.22666	0.101649	111.82	25.2825	0.768741	5	17	2.17104e-12	4.97385e-09
5322	AM867566	(sp:Q58DA1) Sperm flagellar protein 1 OS=Bos taurus GN=SPEF1 PE=2 SV=1	5	0	-0.640836	0.0911566	0.0988838	0.0510317	-0.690476	0.175573	-0.642426	0.139025	-0.107927	0.0235759	0.140195	0.0846914	50.5474	3.06007	0.205831	5	17	1.31079e-09	2.37253e-06
8590	AM867587	PREDICTED: similar to predicted protein [Ciona intestinalis]	5	0	0.408655	0.0531483	1.42252	0.133568	0.407578	0.103407	0.541905	0.0647433	1.26848	0.0177287	1.35916	0.0212626	149.802	4.78638	0.108635	5	17	1.94622e-13	4.65925e-10
16224	AM867810	0	5	0	-0.910394	0.152521	1.40321	0.145082	-0.604063	0.277452	-0.0745635	0.627994	1.90257	0.135641	2.05473	0.0748216	69.8088	32.8634	1.6006	5	17	1.00151e-10	2.03607e-07
26297	AM867935	(sp:Q0VAA2) Uncharacterized protein C14orf166B OS=Homo sapiens GN=C14orf166B PE=2 SV=1	5	0	-0.889682	0.256654	1.61287	0.0874575	-0.843736	0.165201	-0.233207	0.503185	1.69979	0.154118	1.78959	0.103071	98.3111	33.0035	1.1414	5	17	6.23268e-12	1.39238e-08
36023	AM867948	(sp:Q8N7U6) EF-hand domain-containing family member B OS=Homo sapiens GN=EFHB PE=2 SV=3	5	0	-0.564279	0.0491352	0.565676	0.0801236	-0.757513	0.0969932	-0.631457	0.0697894	-0.00294062	0.0417424	0.1808	0.107171	176.146	5.55785	0.107279	5	17	5.07372e-14	1.23596e-10
25949	AM867959	(sp:Q6JEL3) Kelch-like protein 10 OS=Rattus norvegicus GN=Klhl10 PE=2 SV=1	5	0	-1.57648	0.321663	0.971758	0.0971909	-1.75634	0.429187	-1.09081	0.963202	1.26262	0.166745	1.33427	0.0441985	38.01	41.7673	3.73609	5	17	1.2078e-08	1.88175e-05
32330	AM868224	hypothetical protein [Paramecium tetraurelia strain d4-2]	5	0	-1.28397	0.321494	1.04042	0.0806689	-0.694851	0.573888	-1.18129	0.218602	-0.103831	0.590837	-0.169655	0.455265	17.9556	14.6865	2.78098	5	17	2.9935e-06	0.00226608
41061	AM869023	0	5	0	0.600809	0.0741578	1.05563	0.166619	0.63686	0.0642547	0.735283	0.0725634	0.938791	0.0525262	1.11413	0.0205248	24.0571	0.953424	0.134748	5	17	3.7329e-07	0.000400167
8909	AM853970	0	5	0	1.46341	0.0252087	1.85369	0.0865233	1.59964	0.0303828	1.71139	0.02977	1.83151	0.113534	1.93297	0.0658431	30.263	0.610414	0.0685792	5	17	6.8329e-08	8.96477e-05
32579	AM869249	(sp:Q9Z1J8) SEC14-like protein 3 OS=Rattus norvegicus GN=Sec14l3 PE=1 SV=1	5	0	0.353073	0.0296063	0.928461	0.0645909	0.46437	0.0504693	0.373919	0.10494	0.72073	0.0604878	0.968973	0.132281	44.6735	1.51939	0.115637	5	17	3.45387e-09	5.95448e-06
41595	AM869258	(sp:Q96M34) Uncharacterized protein C3orf30 OS=Homo sapiens GN=C3orf30 PE=2 SV=1	5	male gonad	-0.371785	0.0332538	0.813941	0.133759	-0.357422	0.0721574	-0.447162	0.180109	0.0974513	0.0617677	0.313157	0.0861678	83.9487	4.93408	0.199835	5	17	2.25587e-11	4.83885e-08
38779	AM869445	(sp:Q61241) Testis-specific serine/threonine-protein kinase 1 OS=Mus musculus GN=Tssk1b PE=1 SV=1	5	0	-0.942987	0.101788	0.626151	0.322695	-0.789434	0.0741875	-0.698785	0.330223	0.993331	0.320885	1.18596	0.223807	59.1347	18.1463	1.04333	5	17	3.78069e-10	7.30051e-07
19214	CU684428	0	5	male gonad	-0.425482	0.148448	-0.035569	0.0617222	-0.627861	0.062431	-0.796803	0.118004	-0.0761241	0.113532	0.131133	0.0381325	55.8803	2.64854	0.161149	5	17	5.92972e-10	1.11301e-06
8406	CU684841	(sp:Q9JLI7) Sperm-associated antigen 6 OS=Mus musculus GN=Spag6 PE=1 SV=1	5	0	-0.789461	0.071188	0.0372667	0.0689858	-0.872116	0.0758161	-0.819832	0.047811	-0.313926	0.0573514	0.0316807	0.0984689	139.109	3.65156	0.0892489	5	17	3.59268e-13	8.51825e-10
25767	CU684938	0	5	0	1.62013	0.118524	2.38051	0.0651778	1.49332	0.0551094	1.49472	0.0936234	1.98566	0.0438363	2.10954	0.0620739	86.0085	2.6738	0.105698	5	17	1.85274e-11	3.99636e-08
11897	CU684984	0	5	0	0.145155	0.410664	1.7213	0.109768	0.556208	0.25313	0.69646	0.0291457	0.860221	0.285685	0.648996	0.336225	15.0047	5.46889	1.23923	5	17	1.01758e-05	0.00591213
36420	CU685202	(sp:Q5T655) Coiled-coil domain-containing protein 147 OS=Homo sapiens GN=CCDC147 PE=2 SV=1	5	0	-0.478306	0.0957053	-0.119922	0.0222448	-0.407388	0.0545057	-0.437353	0.0902128	-0.176825	0.0491743	0.0357616	0.0806784	33.3936	0.851084	0.0866539	5	17	3.2495e-08	4.60454e-05
43561	CU685363	0	5	0	-0.500313	0.0700822	0.53329	0.0926953	-0.362822	0.0662759	-0.209835	0.0776841	0.665282	0.0925783	0.849358	0.0649983	220.848	6.60008	0.10161	5	17	7.66054e-15	1.88296e-11
35306	CU685474	0	5	male gonad	0.465534	0.0271535	1.30803	0.0531049	0.554988	0.0506294	0.582477	0.0310873	1.28246	0.120765	1.45628	0.0537231	227.89	3.9605	0.0590885	5	17	5.88418e-15	1.44751e-11
31923	CU685498	0	5	0	0.67587	0.118698	1.94715	0.0388516	0.811819	0.099909	0.96796	0.0596387	1.25473	0.0738636	1.27437	0.102118	108.232	4.12579	0.129607	5	17	2.83718e-12	6.46308e-09
37830	CU686086	0	5	0	0.335692	0.0646642	1.07506	0.0769834	0.0899434	0.0495961	0.1735	0.0926727	0.877723	0.153388	1.16619	0.0733412	119.787	4.46243	0.12666	5	17	1.23301e-12	2.85689e-09
14225	CU988103	(sp:Q66HD2) Kelch-like protein 36 OS=Rattus norvegicus GN=Klhl36 PE=2 SV=1	6	0	0.14245	0.178705	1.93909	0.0836555	-0.135648	0.0977002	0.0543548	0.0686758	1.20953	0.075308	1.32825	0.0837479	251.008	14.1723	0.19197	5	17	2.66454e-15	6.57607e-12
11344	AM854799	0	6	0	0.584264	0.0951327	1.31766	0.10927	0.874842	0.154523	1.06715	0.178209	1.08177	0.160845	1.31557	0.0610245	18.1171	1.56015	0.292791	5	17	2.81305e-06	0.0021548
772	CU988915	(sp:Q498H0) Sister chromatid cohesion protein PDS5 homolog B-A OS=Xenopus laevis GN=pds5b-A PE=1 SV=1	6	0	0.582869	0.0822984	0.813061	0.0839351	0.278174	0.0430162	0.280599	0.0368351	0.368267	0.121399	0.720774	0.0690555	37.7003	1.05181	0.0948574	5	17	1.28623e-08	1.99495e-05
44054	CU989036	0	6	0	0.615371	0.241757	2.39959	0.087212	0.632397	0.17386	1.06134	0.429066	2.49112	0.0436551	2.50516	0.0372712	68.0346	16.9909	0.849112	5	17	1.23173e-10	2.48932e-07
863	CU989364	0	6	0	1.2569	0.0916407	1.69544	0.0873232	1.28293	0.0239075	1.41649	0.015072	1.64283	0.0463492	1.89999	0.0508279	70.1163	1.28917	0.0625132	5	17	9.6671e-11	1.97016e-07
3980	CU989844	predicted protein [Nematostella vectensis]	6	male gonad	1.08873	0.0954369	2.30423	0.086112	1.28698	0.18092	1.42388	0.0465478	2.34543	0.102369	2.49231	0.0323755	142.367	7.46885	0.17837	5	17	2.96652e-13	7.06031e-10
13199	CU991439	predicted protein [Nematostella vectensis]	6	male gonad	0.971585	0.129665	1.36736	0.106126	0.787398	0.0968133	0.890135	0.0616648	1.15441	0.0770064	1.35602	0.0886552	25.3043	1.18478	0.159192	5	17	2.57977e-07	0.000289193
31430	CU992035	0	6	0	-0.177603	0.188329	1.38246	0.048894	0.211146	0.233479	0.360899	0.13245	1.26621	0.0601226	1.62239	0.0838729	101.139	10.6516	0.358074	5	17	4.94271e-12	1.11063e-08
1196	CU997450	0	6	0	-0.115455	0.0992172	1.33223	0.290055	0.0346711	0.114813	0.226325	0.0836704	0.876143	0.499472	0.953472	0.336689	19.1845	6.66662	1.1815	5	17	1.88577e-06	0.00156519
29796	CU997820	0	6	male gonad	-0.0570289	0.172417	1.99213	0.126423	0.111173	0.137079	0.259593	0.175688	0.890757	0.329063	0.950815	0.240383	57.7749	11.4873	0.676018	5	17	4.54975e-10	8.68547e-07
19629	CU998139	0	6	0	1.42794	0.0608862	2.09315	0.0428669	1.26012	0.0750338	1.34485	0.0596823	1.98438	0.129983	2.3317	0.0762755	142.878	4.01129	0.0954552	5	17	2.87992e-13	6.85709e-10
4844	CU998495	"(sp:Q96JB1) Dynein heavy chain 8, axonemal OS=Homo sapiens GN=DNAH8 PE=1 SV=2"	6	male gonad	0.251511	0.122349	1.63078	0.0541805	0.0146907	0.106659	0.232979	0.069987	1.26552	0.123443	1.60801	0.0260195	276.276	10.9734	0.135044	5	17	1.22125e-15	3.02258e-12
34795	CU999980	0	6	male gonad	-1.14125	0.391715	0.985569	0.262205	-0.765952	0.218692	-0.640283	0.154541	-0.292303	0.277198	0.445546	0.380382	29.8275	12.8912	1.46945	5	17	7.61769e-08	9.84968e-05
9883	DV736506	0	6	0	0.322576	0.138133	1.71106	0.06992	0.609903	0.144672	0.709451	0.0798471	1.67733	0.177515	1.80463	0.0450503	129.058	8.46226	0.222936	5	17	6.67244e-13	1.56736e-09
43186	DV736576	0	6	0	1.34052	0.013997	1.88225	0.0747816	1.26054	0.0397674	1.2763	0.0206127	1.85945	0.0739056	2.24352	0.0280333	305.939	3.29922	0.0366653	5	17	5.55111e-16	1.37557e-12
29360	DV736941	0	6	0	0.739618	0.0980235	2.17532	0.0242172	0.572083	0.0596587	0.630925	0.143568	2.08798	0.025418	2.15747	0.0258531	413.555	12.9413	0.106396	5	17	0	0
1111	DW713865	(sp:Q28DR4) Histone H4 OS=Xenopus tropicalis GN=TGas006m08.1 PE=3 SV=1	6	male gonad	0.381082	0.103208	1.38395	0.0651556	0.303527	0.0656745	0.454168	0.0714732	0.886914	0.129065	1.52992	0.101792	140.46	5.67443	0.137356	5	17	3.31624e-13	7.87274e-10
3206	ES789360	"PREDICTED: similar to protein tyrosine phosphatase, receptor type, A [Ciona intestinalis]"	6	0	-1.23518	0.317243	0.515662	0.248275	-0.914972	0.0498377	-0.881209	0.287738	-0.142526	0.0743791	0.302836	0.22453	38.7169	10.3054	0.904988	5	17	1.04804e-08	1.65485e-05
28403	EX956377	(sp:Q14565) Meiotic recombination protein DMC1/LIM15 homolog OS=Homo sapiens GN=DMC1 PE=1 SV=2	6	male gonad	-0.299167	0.492404	1.3407	0.147784	0.258731	0.276127	0.479746	0.139878	1.44932	0.153647	1.68953	0.0604123	35.875	12.0129	1.1385	5	17	1.88186e-08	2.80586e-05
5523	AM856507	0	6	0	0.250364	0.218092	1.53982	0.225845	0.286942	0.214566	0.832746	0.109458	1.09702	0.101957	1.17761	0.18023	30.2008	5.22304	0.588009	5	17	6.9392e-08	9.07648e-05
24962	FP002722	0	6	0	1.26873	0.04085	1.74751	0.0217268	1.21525	0.0644076	1.27429	0.0305873	1.67568	0.0955779	1.84692	0.0672435	99.1844	1.56097	0.0535094	5	17	5.79814e-12	1.29762e-08
27818	FP007223	(sp:P97363) Serine palmitoyltransferase 2 OS=Mus musculus GN=Sptlc2 PE=2 SV=2	6	male gonad	-0.427361	0.0930747	0.466005	0.0794138	-0.523294	0.0937368	-0.621951	0.0636783	0.10531	0.0336781	0.589127	0.0594448	195.226	5.52963	0.0963024	5	17	2.15383e-14	5.26397e-11
9625	FP008556	(sp:Q3SXZ7) Probable tubulin polyglutamylase TTLL9 OS=Homo sapiens GN=TTLL9 PE=2 SV=3	6	0	1.10897	0.15745	1.69923	0.0802635	1.03966	0.0622472	1.03815	0.0644353	1.49476	0.0785187	1.97636	0.104877	64.4683	3.09269	0.163106	5	17	1.8969e-10	3.79001e-07
12969	FP009825	0	6	0	0.354399	0.082929	1.04718	0.0416417	0.343499	0.119085	0.364841	0.190247	0.825008	0.115114	1.19903	0.105369	42.4193	2.954	0.236769	5	17	5.16923e-09	8.59126e-06
16621	FP010267	0	6	0	1.32504	0.0657084	1.97652	0.107036	1.34821	0.0768349	1.34122	0.0802751	1.69143	0.0808373	1.99233	0.0310562	68.7882	2.02984	0.100329	5	17	1.1274e-10	2.28298e-07
42995	FP010271	(sp:Q9JLQ0) CD2-associated protein OS=Mus musculus GN=Cd2ap PE=1 SV=2	6	male gonad	1.30411	0.0401368	1.95171	0.113779	1.3797	0.0646828	1.40087	0.060616	1.80157	0.0320433	2.21338	0.102771	91.3345	2.71274	0.100984	5	17	1.13634e-11	2.48403e-08
18225	FP010434	viral A-type inclusion protein [Trichomonas vaginalis G3]	6	0	0.895814	0.0300713	1.4312	0.0901107	1.00365	0.0312758	1.07654	0.0326136	1.39982	0.10065	1.67736	0.103841	71.0113	1.79215	0.0858078	5	17	8.72903e-11	1.78683e-07
24414	FP010952	0	6	male gonad	0.827722	0.120628	1.60584	0.0874302	0.646119	0.0985786	0.646478	0.0138828	1.17868	0.140652	1.5608	0.0881796	81.5402	3.81822	0.159209	5	17	2.85671e-11	6.08766e-08
9373	FP011734	0	6	0	-0.316073	0.260096	2.3811	0.0699262	0.0909156	0.252539	0.555908	0.838199	2.48945	0.0436187	2.50426	0.0381538	44.6034	33.1226	2.52485	5	17	3.4965e-09	6.01398e-06
1240	FP011756	0	6	0	0.655428	0.0814708	1.24952	0.0240873	0.766836	0.0654756	0.995716	0.0818847	1.15488	0.0544358	1.30724	0.0376884	72.6658	1.38529	0.0648173	5	17	7.25083e-11	1.49802e-07
1162	FP089746	0	6	male gonad	-0.629344	0.105814	0.869451	0.0306357	-0.478754	0.098593	-0.355926	0.107313	0.581485	0.0857563	0.965085	0.0951363	247.115	10.3189	0.141976	5	17	2.9976e-15	7.39209e-12
26941	FP089887	0	6	male gonad	0.0714678	0.0714088	0.711148	0.129608	0.237343	0.0498846	0.22559	0.0605957	0.50814	0.0275052	0.776589	0.0686538	55.9059	1.64144	0.0998265	5	17	5.90823e-10	1.11016e-06
38340	FP089910	0	6	male gonad	0.250084	0.100763	1.16755	0.163274	0.536469	0.137112	0.62249	0.109575	1.19104	0.160964	1.50372	0.0916407	54.6247	4.49637	0.279867	5	17	7.10068e-10	1.32428e-06
21490	EF219426	hypothetical protein BRAFLDRAFT_118409 [Branchiostoma floridae]	6	0	0.448584	0.303079	2.45718	0.0415772	0.631548	0.367455	1.1994	0.866342	2.49169	0.0429581	2.50821	0.0346609	21.1465	18.3151	2.94477	5	17	9.46286e-07	0.000875314
32629	EF219427	hypothetical protein BRAFLDRAFT_118409 [Branchiostoma floridae]	6	0	0.334526	0.274226	2.45718	0.041576	0.504098	0.396412	1.09596	0.828868	2.49169	0.0429561	2.50799	0.0349386	25.4248	20.7185	2.77063	5	17	2.49134e-07	0.000280525
38965	EF219428	hypothetical protein BRAFLDRAFT_118409 [Branchiostoma floridae]	6	0	0.42435	0.289296	2.45691	0.0420261	0.660673	0.35201	1.24267	0.866005	2.49169	0.0429542	2.50721	0.0343918	21.4262	18.1822	2.88524	5	17	8.61453e-07	0.000816657
12243	EF219429	hypothetical protein BRAFLDRAFT_118409 [Branchiostoma floridae]	6	0	0.0995072	0.303465	2.45717	0.0415713	0.270617	0.354421	0.860853	0.803452	2.49098	0.0431567	2.50734	0.0345446	33.9393	25.9756	2.60221	5	17	2.87294e-08	4.12841e-05
3654	AM854428	(sp:P62870) Transcription elongation factor B polypeptide 2 OS=Rattus norvegicus GN=Tceb2 PE=1 SV=1	6	0	1.39944	0.0400563	1.90412	0.0821153	1.29188	0.0620941	1.28825	0.0327259	1.85932	0.106971	2.22197	0.0347892	153.028	2.98579	0.0663388	5	17	1.63203e-13	3.9136e-10
27064	AM859447	(sp:Q9UPY8) Microtubule-associated protein RP/EB family member 3 OS=Homo sapiens GN=MAPRE3 PE=1 SV=1	6	0	1.24342	0.0300718	1.58565	0.0366451	1.07074	0.0942949	0.93051	0.0658789	1.3708	0.0198064	1.57795	0.10345	60.7996	1.41853	0.0793264	5	17	3.03e-10	5.92972e-07
33033	CF369228	hypothetical protein BRAFLDRAFT_125849 [Branchiostoma floridae]	6	0	0.301494	0.275206	2.45692	0.0412804	0.485165	0.391332	1.05809	0.819631	2.49169	0.0429565	2.50801	0.0349168	26.7065	21.3218	2.71448	5	17	1.73423e-07	0.000205332
8834	DW713885	(sp:Q95NR9) Calmodulin OS=Metridium senile PE=1 SV=3	6	0	0.15002	0.0326075	0.872082	0.0434326	0.061378	0.0589672	0.144987	0.0413064	0.613208	0.113799	0.916362	0.0639935	162.896	2.99848	0.062585	5	17	9.71445e-14	2.34604e-10
13083	AM859923	0	6	0	-0.207528	0.167061	2.38299	0.130861	0.242224	0.1612	0.728308	0.57673	2.44041	0.0593329	2.50566	0.0317284	81.5378	29.2809	1.22097	5	17	2.85738e-11	6.08622e-08
14659	AM857687	0	6	male gonad	-0.105465	0.273759	1.44388	0.0618473	-0.235495	0.248461	0.10616	0.343572	1.42037	0.0955471	1.96943	0.118281	71.9527	17.689	0.835863	5	17	7.85056e-11	1.61565e-07
3444	AM857723	0	6	0	-1.11919	0.674575	1.23848	0.249272	-0.630165	0.251838	-0.379012	0.490139	1.13784	0.279128	1.53971	0.145435	31.8263	25.1037	2.68182	5	17	4.67618e-08	6.35493e-05
12955	AM865356	0	6	0	1.81484	0.0493497	2.45677	0.0422947	1.95033	0.0449882	1.80359	0.126787	2.41784	0.0864995	2.50755	0.0339905	87.2552	2.19164	0.0854	5	17	1.64821e-11	3.56509e-08
10357	AM858924	0	6	0	1.34456	0.0444326	1.67173	0.0365273	1.23597	0.0340972	1.31631	0.0354733	1.58603	0.055196	1.79267	0.0581073	100.686	0.989417	0.0334109	5	17	5.12779e-12	1.15068e-08
2085	AM857813	0	6	0	-0.793466	0.41173	1.39134	0.0739005	-0.569011	0.21246	-0.307722	0.377932	1.30194	0.0984	1.54018	0.0529469	70.1098	23.0257	1.11664	5	17	9.67436e-11	1.97067e-07
17546	BQ426815	0	6	0	1.73718	0.0502933	2.33171	0.0300693	1.70175	0.0582037	1.77969	0.0479827	2.03876	0.105064	2.30044	0.0677421	87.2344	1.62191	0.0632148	5	17	1.65141e-11	3.57035e-08
18778	AM857859	0	6	0	0.317925	0.0930607	1.38117	0.0973321	0.820872	0.102023	0.965094	0.0372099	1.65473	0.13935	1.82075	0.077119	141.935	6.11409	0.14646	5	17	3.04201e-13	7.23086e-10
38897	AM856476	0	6	0	0.257972	0.04233	0.758684	0.0307648	0.356781	0.0550889	0.428224	0.0492239	0.692861	0.0896109	0.971582	0.078603	85.27	1.4843	0.0591838	5	17	1.9872e-11	4.27844e-08
39943	AM866101	(sp:Q6GR35) UPF0436 protein C9orf6 homolog OS=Xenopus laevis PE=2 SV=1	6	male gonad	1.07438	0.048488	1.74296	0.136883	1.24999	0.119956	1.23224	0.0639685	1.63815	0.0217785	2.0068	0.0364206	70.8546	2.57652	0.123636	5	17	8.88568e-11	1.81801e-07
24317	AM860926	0	6	0	0.291402	0.18862	2.17614	0.0843335	1.10392	0.201031	1.16601	0.14317	1.95804	0.17355	2.40951	0.0635382	112.549	12.6834	0.383152	5	17	2.05813e-12	4.72135e-09
36966	AM857615	(sp:Q4R8G6) Uncharacterized protein C16orf73 homolog OS=Macaca fascicularis GN=QtsA-12515 PE=2 SV=1	6	male gonad	-0.578431	0.102903	0.790868	0.0576534	0.0141298	0.174898	0.211809	0.0847451	0.593617	0.104832	0.8645	0.0666307	106.122	5.94127	0.190351	5	17	3.33411e-12	7.57176e-09
4276	AJ431728	(sp:P41383) Tubulin alpha-2/alpha-4 chain OS=Patella vulgata GN=TUB2 PE=2 SV=1	6	male gonad	-0.429731	0.079063	1.11977	0.10828	-0.274472	0.113249	0.116765	0.115599	0.928427	0.0979123	1.30085	0.0546981	233.11	11.0138	0.160641	5	17	4.88498e-15	1.20366e-11
43380	EW778942	0	6	0	1.56024	0.0209371	1.91466	0.0679721	1.48058	0.0180084	1.4499	0.0234926	1.68531	0.138244	2.02509	0.0787546	51.2087	1.12409	0.0746341	5	17	1.18311e-09	2.15327e-06
27863	AM858163	0	6	male gonad	-0.432111	0.147233	1.84786	0.0260135	0.0753624	0.354566	0.236242	0.407635	1.67024	0.107135	2.02951	0.107657	74.8969	22.0382	1.00044	5	17	5.68123e-11	1.18397e-07
41637	ES789836	0	6	0	1.43998	0.018683	1.80827	0.0438723	1.50466	0.0579659	1.54196	0.021424	1.70867	0.00994358	1.97152	0.0195226	143.679	0.829105	0.0196197	5	17	2.75002e-13	6.55605e-10
40065	CU991158	0	6	0	1.11535	0.0212665	2.01517	0.0645892	1.62961	0.132048	1.73934	0.0471712	1.83632	0.106803	2.15308	0.0725875	79.9792	2.62234	0.111478	5	17	3.34106e-11	7.07303e-08
12221	AM859901	0	6	0	-0.172717	0.112462	1.38151	0.108432	0.595417	0.150953	0.938152	0.2892	1.44415	0.119892	1.7885	0.0974244	74.2377	9.8192	0.449708	5	17	6.10143e-11	1.2691e-07
1804	AM858411	(sp:Q8N1H7) Protein SIX6OS1 OS=Homo sapiens GN=SIX6OS1 PE=2 SV=1	6	male gonad	-0.50298	0.0673836	0.930775	0.105346	-0.20844	0.157299	-0.137864	0.081311	0.691596	0.124504	1.02606	0.0592229	158.977	8.53346	0.182503	5	17	1.18905e-13	2.86442e-10
29627	AM862157	0	6	male gonad	-0.92352	0.190346	1.02933	0.107484	-0.469069	0.115549	-0.205539	0.149276	0.690813	0.164791	1.20693	0.013354	167.458	15.0271	0.305105	5	17	7.72715e-14	1.87615e-10
1536	AM864296	hypothetical protein IscW_ISCW018140 [Ixodes scapularis]	6	0	-1.05813	0.332105	1.32464	0.058519	-0.70202	0.131235	-0.312891	0.372437	1.20509	0.269385	1.60613	0.153987	87.475	26.3768	1.02522	5	17	1.61484e-11	3.49613e-08
8334	AM858495	0	6	0	-1.16128	0.255544	1.02026	0.123617	-0.712743	0.208518	-0.411522	0.255204	0.988983	0.071025	1.31514	0.114344	119.512	21.6842	0.616892	5	17	1.25655e-12	2.90766e-09
9602	AM866457	0	6	male gonad	-0.523712	0.158829	1.29916	0.158889	-0.325123	0.128032	-0.14939	0.0803204	1.28917	0.154517	1.36159	0.0498917	197.112	15.9525	0.275166	5	17	1.9873e-14	4.86292e-11
14139	AM865804	"(sp:P35191) DnaJ homolog 1, mitochondrial OS=Saccharomyces cerevisiae GN=MDJ1 PE=1 SV=1"	6	0	1.33374	0.053843	1.72156	0.0701224	1.38859	0.0543962	1.39131	0.0720659	1.55981	0.0917228	1.79159	0.0296604	37.0503	0.734156	0.0673713	5	17	1.47004e-08	2.24622e-05
27395	BQ427303	0	6	0	2.13198	0.0466724	2.45684	0.0414902	2.17074	0.050317	2.1763	0.0186333	2.46792	0.0155888	2.50685	0.036291	81.2254	0.591831	0.0247734	5	17	2.9477e-11	6.2668e-08
22046	CU685284	0	6	0	1.59589	0.0170555	1.8607	0.0907682	1.52824	0.0134589	1.51281	0.0259715	1.72235	0.127454	1.92637	0.0861802	24.9631	0.608853	0.0829265	5	17	2.84969e-07	0.000316031
30511	AM858618	0	6	0	0.375458	0.156496	2.19007	0.12007	1.48126	0.158607	1.61334	0.084153	2.22231	0.0893509	2.39883	0.0826809	149.243	10.9699	0.249912	5	17	2.00728e-13	4.80142e-10
30240	AM858604	(sp:Q66IM5) Protein GTLF3B OS=Xenopus tropicalis GN=gtlf3b PE=3 SV=1	6	0	1.46088	0.028793	1.79272	0.102772	1.44748	0.0407872	1.50054	0.0741499	1.90561	0.0902397	2.00892	0.129922	32.5371	1.1731	0.122585	5	17	3.95701e-08	5.48046e-05
43225	AM857792	PREDICTED: hypothetical protein [Strongylocentrotus purpuratus]	6	male gonad	0.314368	0.0626422	1.47005	0.0693689	0.522498	0.190331	0.681355	0.0665299	1.61832	0.140041	1.94012	0.0170002	156.363	8.65762	0.188254	5	17	1.36446e-13	3.28017e-10
44084	FP089739	0	6	male gonad	-0.651374	0.0783776	1.38988	0.0512773	-0.422337	0.130603	-0.226544	0.213889	1.25563	0.0938896	1.53056	0.0354977	286.194	19.8774	0.236145	5	17	8.88178e-16	2.19913e-12
9832	AM858971	(sp:P23942) Peripherin-2 OS=Homo sapiens GN=PRPH2 PE=1 SV=1	6	0	-0.885068	0.182995	0.853056	0.102797	-0.428716	0.0832583	-0.25477	0.0785649	1.10948	0.153514	1.22158	0.12217	199.508	15.4551	0.263385	5	17	1.79856e-14	4.40468e-11
9555	CU998852	(sp:Q9C005) Protein dpy-30 homolog OS=Homo sapiens GN=DPY30 PE=1 SV=1	6	0	1.83024	0.0668388	2.31609	0.103633	1.80093	0.0505786	1.82246	0.0258703	2.30559	0.0397702	2.4909	0.0524766	95.624	1.87673	0.0667289	5	17	7.81564e-12	1.73116e-08
31156	AM858978	0	6	0	-0.470734	0.0279479	1.21601	0.0182629	-0.330248	0.183409	-0.0776892	0.246899	1.39776	0.140047	1.56624	0.0657004	169.075	16.8734	0.339313	5	17	7.13873e-14	1.734e-10
24105	AM858990	(sp:O02485) Uncharacterized protein ZK1073.1 OS=Caenorhabditis elegans GN=ZK1073.1 PE=2 SV=1	6	0	0.538192	0.0280847	1.25281	0.154685	0.767279	0.0625399	0.840424	0.0361242	1.154	0.0219566	1.40639	0.0650188	70.8175	2.1546	0.103444	5	17	8.92321e-11	1.8248e-07
41455	AM858998	0	6	0	0.24593	0.0556118	1.72904	0.151612	0.744396	0.0716468	0.831347	0.205054	1.7119	0.0233633	1.8779	0.209915	84.1121	8.73435	0.353062	5	17	2.22055e-11	4.76529e-08
8811	AM864358	0	6	male gonad	-0.517537	0.204223	2.16258	0.10622	-0.234456	0.230868	0.319732	0.592167	2.08498	0.108037	2.29461	0.0904569	78.5618	32.7821	1.41874	5	17	3.86147e-11	8.13997e-08
24665	CU998929	0	6	male gonad	0.891877	0.0804493	1.65101	0.0734413	0.846603	0.0581086	0.869763	0.0428352	1.22152	0.111855	1.56922	0.104495	82.9337	2.65905	0.109012	5	17	2.48993e-11	5.32098e-08
31122	CF369232	0	6	0	0.482809	0.173937	2.23994	0.0501503	1.17538	0.440981	1.1414	0.127217	2.28933	0.12499	2.49821	0.0306088	57.1344	12.8436	0.764308	5	17	4.97143e-10	9.4308e-07
13824	CU682392	0	6	0	1.75368	0.043882	2.19692	0.0655186	1.88741	0.040039	1.99487	0.0263174	2.14855	0.0463945	2.27534	0.0529555	69.7142	0.784487	0.0382599	5	17	1.01248e-10	2.05636e-07
26958	AM861289	(sp:A0JN61) DNA-directed RNA polymerase III subunit RPC9 OS=Bos taurus GN=CRCP PE=2 SV=1	6	0	1.60301	0.0698711	1.86393	0.0863072	1.61923	0.0651577	1.6572	0.0287803	1.9388	0.0572872	2.0932	0.0293972	43.3821	0.783051	0.0613704	5	17	4.34128e-09	7.31072e-06
10352	AM858795	(sp:A8MTL3) RING finger protein ENSP00000382794 OS=Homo sapiens PE=2 SV=1	6	male gonad	0.205443	0.15273	1.49646	0.0623896	0.602483	0.126126	0.761862	0.10774	1.28914	0.0460899	1.69066	0.0369809	128.635	6.52846	0.172556	5	17	6.85563e-13	1.60902e-09
24501	EW778926	(sp:P79145) cAMP-responsive element modulator OS=Canis familiaris GN=CREM PE=2 SV=2	6	0	0.610236	0.0578425	1.07916	0.0348158	0.429417	0.0797539	0.295057	0.0597641	0.81139	0.0732346	1.20423	0.0804074	119.287	2.58198	0.0735936	5	17	1.27631e-12	2.95211e-09
9446	AM859833	0	6	0	-0.246044	0.152504	2.44364	0.039757	0.0368815	0.215408	0.652718	0.565073	2.45196	0.021395	2.50704	0.033325	94.3145	32.6186	1.17589	5	17	8.74645e-12	1.92509e-08
6679	AM859175	0	6	0	-0.690408	0.0929499	0.628701	0.114703	-0.377048	0.0681304	-0.249813	0.0967835	0.428687	0.129388	0.973247	0.181792	118.845	8.39053	0.240042	5	17	1.31584e-12	3.03827e-09
41084	AM860913	0	6	male gonad	-0.293727	0.0861429	1.21089	0.0638385	0.448419	0.206861	0.623998	0.10409	1.00683	0.102916	1.35742	0.0685626	107.274	7.27736	0.230653	5	17	3.05167e-12	6.9395e-09
43751	AM862213	(sp:Q9D5I4) Tctex1 domain-containing protein 1 OS=Mus musculus GN=Tctex1d1 PE=2 SV=1	6	male gonad	0.252268	0.257477	1.60385	0.118594	0.714193	0.0545503	0.744139	0.116838	1.71276	0.0366964	1.9801	0.0470662	103.844	9.17179	0.300297	5	17	3.98259e-12	8.99668e-09
36481	AM858055	0	6	0	0.0728976	0.209708	1.15267	0.0947532	0.236084	0.118637	0.120964	0.217381	0.937028	0.307786	1.17548	0.168253	29.9994	5.44617	0.617245	5	17	7.29642e-08	9.48534e-05
37738	AM861810	(sp:Q5HZE5) Transmembrane protein 17 OS=Rattus norvegicus GN=Tmem17 PE=2 SV=1	6	0	0.579611	0.045494	0.886798	0.0946358	0.509793	0.0373099	0.479006	0.0473511	0.718429	0.084348	1.12087	0.0377486	67.5578	1.24154	0.0624834	5	17	1.30329e-10	2.63264e-07
7615	AM859362	0	6	male gonad	-0.16012	0.0684716	1.63167	0.146276	0.104345	0.0899151	0.32205	0.234914	1.59199	0.084477	1.87772	0.0643038	181.525	15.7361	0.29474	5	17	3.95239e-14	9.63198e-11
26628	AM859619	0	6	male gonad	0.0948698	0.277401	0.878435	0.0691919	0.0187737	0.0815669	0.100956	0.109356	0.881697	0.0342886	1.07621	0.0531133	49.674	4.55638	0.311867	5	17	1.50363e-09	2.70804e-06
791	AM859771	0	6	male gonad	-0.451163	0.123505	1.61809	0.0926272	-0.486096	0.190738	-0.163391	0.757194	1.8776	0.342623	2.04667	0.281782	41.1005	28.6937	2.37365	5	17	6.60485e-09	1.07593e-05
24055	AM860501	(sp:P60368) Keratin-associated protein 10-2 OS=Homo sapiens GN=KRTAP10-2 PE=2 SV=1	6	0	0.439719	0.439857	2.06314	0.353205	0.573826	0.143945	0.858335	0.123712	1.77277	0.0767119	2.04151	0.169948	32.2951	11.0295	1.16117	5	17	4.187e-08	5.7655e-05
44394	AM860511	0	6	male gonad	-0.464307	0.131194	1.09777	0.0270259	-0.268411	0.130193	-0.104932	0.120211	1.13249	0.0903265	1.38269	0.0333848	267.416	13.1892	0.167691	5	17	1.55431e-15	3.84537e-12
35166	AM860557	hypothetical protein BRAFLDRAFT_100807 [Branchiostoma floridae]	6	male gonad	-0.819405	0.114864	0.579216	0.0680252	-0.4398	0.126288	-0.306655	0.060393	0.379818	0.0974466	0.698463	0.116811	149.321	7.56169	0.172177	5	17	1.99951e-13	4.78483e-10
36412	AM860562	0	6	male gonad	0.0209312	0.0851732	1.20333	0.0982167	0.123539	0.115829	0.402193	0.102216	1.37662	0.0922723	1.60985	0.0630899	205.278	9.13277	0.151265	5	17	1.42109e-14	3.48166e-11
28548	AM860659	0	6	male gonad	-0.887101	0.503188	1.02362	0.0342869	-0.32588	0.263967	-0.178551	0.151412	0.953232	0.153791	1.26839	0.0724787	46.9264	15.2372	1.104	5	17	2.35075e-09	4.15142e-06
8435	AM861090	(sp:Q5REP9) Kelch-like protein 3 OS=Pongo abelii GN=KLHL3 PE=2 SV=1	6	male gonad	-0.0526463	0.199752	1.56295	0.126221	-0.272534	0.0554415	-0.0644116	0.0774427	0.784449	0.0579217	1.17541	0.172019	134.355	11.4673	0.290193	5	17	4.78728e-13	1.12932e-09
22082	AM861318	(sp:P0C546) Solute carrier family 25 member 42 OS=Rattus norvegicus GN=Slc25a42 PE=2 SV=1	6	male gonad	-0.172358	0.199834	1.23272	0.124168	0.182522	0.131534	0.384034	0.169023	0.906106	0.0417804	1.20016	0.11096	65.1249	6.59087	0.344092	5	17	1.74902e-10	3.50504e-07
32818	AM861984	(sp:Q03410) Synaptonemal complex protein 1 OS=Rattus norvegicus GN=Sycp1 PE=2 SV=2	6	male gonad	0.595015	0.0771279	1.92124	0.131325	1.10906	0.215194	1.3379	0.0562114	2.18787	0.148044	2.25225	0.161116	83.5535	8.34795	0.339699	5	17	2.34395e-11	5.02073e-08
7174	AM862130	0	6	male gonad	-0.283328	0.0785619	1.53106	0.229023	-0.185049	0.14928	0.167871	0.213781	1.77182	0.0882667	1.9263	0.0916584	163.367	20.2102	0.420617	5	17	9.49241e-14	2.29431e-10
20119	AM862211	0	6	0	-0.49271	0.0326019	-0.0417867	0.0382116	-0.43356	0.0892291	-0.266562	0.0461128	-0.261047	0.116886	-0.117279	0.0922121	22.7735	0.607298	0.0906674	5	17	5.55654e-07	0.000563433
25395	AM863025	0	6	0	-0.723337	0.139837	0.857985	0.0588154	-0.377547	0.293682	-0.15426	0.0708853	0.835869	0.0784649	1.15669	0.0351646	111.917	11.8133	0.358886	5	17	2.15572e-12	4.94091e-09
8571	AM863052	0	6	0	-1.29051	0.216006	1.2647	0.106633	-1.38146	0.292692	-0.981097	0.712895	0.938329	0.0778695	1.31176	0.11582	57.5171	33.971	2.00812	5	17	4.71446e-10	8.98105e-07
2667	AM863057	0	6	male gonad	-0.695145	0.204551	1.06698	0.0742191	-0.417236	0.220326	-0.221285	0.177485	1.05264	0.0719115	1.38867	0.0538371	134.527	15.875	0.40122	5	17	4.73732e-13	1.11848e-09
21607	AM863073	(sp:Q6CEJ6) Glucose-repressible alcohol dehydrogenase transcriptional effector OS=Yarrowia lipolytica GN=CCR4 PE=3 SV=1	6	male gonad	0.429445	0.0897163	1.0588	0.0577287	0.312334	0.0647984	0.251152	0.0437783	0.68413	0.149873	1.02151	0.0432432	82.3444	2.49515	0.103025	5	17	2.63819e-11	5.6299e-08
25922	AM863105	(sp:Q5JUQ0) Protein FAM78A OS=Homo sapiens GN=FAM78A PE=2 SV=1	6	0	-0.142673	0.14314	1.89034	0.0820235	0.0855597	0.106902	0.179951	0.0690604	1.16929	0.244145	1.23876	0.174258	128.931	12.9142	0.340555	5	17	6.72684e-13	1.57946e-09
32451	AM863473	(sp:O94813) Slit homolog 2 protein OS=Homo sapiens GN=SLIT2 PE=1 SV=1	6	male gonad	-0.733213	0.0474339	1.1141	0.179626	-0.109742	0.211778	0.0715331	0.081656	0.236414	0.0448186	1.42197	0.11134	145.587	12.8162	0.299306	5	17	2.46581e-13	5.88341e-10
15669	AM864070	(sp:A6NEK1) Arrestin domain-containing protein 5 OS=Homo sapiens GN=ARRDC5 PE=2 SV=1	6	0	0.473778	0.0387862	1.25974	0.0877657	0.738353	0.058222	0.725267	0.0690341	1.24854	0.184938	1.7128	0.118392	87.11	4.16443	0.162542	5	17	1.67069e-11	3.61035e-08
11719	AM864201	(sp:Q24524) Protein singed OS=Drosophila melanogaster GN=sn PE=2 SV=1	6	male gonad	-0.936705	0.261715	1.76934	0.074841	-0.768081	0.435812	-0.407073	0.383274	1.2242	0.281122	1.51226	0.295791	61.0067	29.6657	1.65331	5	17	2.94886e-10	5.77683e-07
21618	AM864226	0	6	0	-0.311673	0.242809	2.39486	0.104183	-0.183792	0.370414	0.495537	0.73765	2.48602	0.0372355	2.50203	0.0390786	54.4794	36.2254	2.26079	5	17	7.25214e-10	1.35107e-06
12469	AM864460	0	6	male gonad	-1.18795	0.0957729	0.300383	0.0705947	-0.816368	0.0877076	-0.689947	0.209374	-0.176815	0.179079	-0.037411	0.20905	52.8863	6.10218	0.392302	5	17	9.17217e-10	1.68493e-06
3629	AM864555	(sp:Q9VJE5) Restin homolog OS=Drosophila melanogaster GN=CLIP-190 PE=1 SV=1	6	0	-0.532118	0.0678843	0.518466	0.235483	-0.086015	0.181205	0.110691	0.109206	0.658839	0.198362	0.76456	0.155665	35.0713	4.80533	0.465855	5	17	2.23756e-08	3.30711e-05
29012	AM864725	predicted protein [Nematostella vectensis]	6	0	-0.152023	0.238023	0.661899	0.0820384	-0.422583	0.179998	-0.576958	0.119983	0.282983	0.104567	0.723194	0.032238	58.19	6.08476	0.355528	5	17	4.2979e-10	8.21758e-07
7144	AM864870	0	6	male gonad	0.625149	0.230111	1.55723	0.136788	0.76839	0.218788	0.924231	0.09321	1.4308	0.15818	1.83338	0.0829215	34.6205	4.63634	0.455324	5	17	2.46954e-08	3.61787e-05
25007	AM865670	(sp:P62138) Serine/threonine-protein phosphatase PP1-alpha catalytic subunit OS=Rattus norvegicus GN=Ppp1ca PE=1 SV=1	6	male gonad	-0.562621	0.158074	0.791837	0.0675049	-0.443526	0.100605	-0.33838	0.149162	0.757401	0.122034	0.986135	0.158386	116.13	9.93214	0.290787	5	17	1.59117e-12	3.66447e-09
14927	AM865827	0	6	0	-0.956347	0.112516	1.06691	0.17839	-0.882754	0.0434939	-0.538523	0.463405	1.20954	0.140573	1.48058	0.0225244	102.442	24.8392	0.824398	5	17	4.45133e-12	1.00422e-08
14619	AM865892	0	6	0	-0.948592	0.078516	0.028775	0.112566	-1.42568	0.18716	-0.823984	0.391941	-0.634768	0.259498	-0.216504	0.144066	22.693	5.46897	0.819391	5	17	5.70035e-07	0.000575735
17777	AM866075	predicted protein [Candida tropicalis MYA-3404]	6	male gonad	-0.97132	0.095352	1.22966	0.114534	-0.570839	0.119209	-0.456287	0.163491	1.00052	0.0574693	1.35049	0.0851728	328.143	21.0223	0.217819	5	17	3.33067e-16	8.25673e-13
29514	AM866244	hypothetical protein BRAFLDRAFT_100807 [Branchiostoma floridae]	6	male gonad	-0.323399	0.129414	1.32731	0.0782544	0.228923	0.167495	0.469887	0.0654926	1.14326	0.117703	1.4298	0.0449028	163.381	9.58193	0.199403	5	17	9.4813e-14	2.29258e-10
44823	AM866347	hypothetical protein BRAFLDRAFT_64442 [Branchiostoma floridae]	6	0	-0.16718	0.126969	1.51032	0.0822187	0.339261	0.24412	0.609546	0.0427607	1.44527	0.0685278	1.73943	0.0240148	146.138	11.3487	0.264035	5	17	2.3892e-13	5.70541e-10
8410	AM866365	0	6	0	0.238098	0.0402914	2.22668	0.101639	0.75592	0.148848	1.00081	0.155057	2.16885	0.0601756	2.42679	0.0595403	289.663	16.3859	0.192333	5	17	7.77156e-16	1.92502e-12
21778	AM866436	PREDICTED: hypothetical protein [Strongylocentrotus purpuratus]	6	male gonad	-0.844463	0.0666578	0.627178	0.0833041	-0.370613	0.189863	-0.245699	0.0571234	0.628727	0.130666	0.843432	0.0440104	160.882	9.08697	0.19204	5	17	1.07692e-13	2.59752e-10
36691	AM866442	(sp:Q6ZV50) Uncharacterized protein FLJ42986 OS=Homo sapiens PE=2 SV=2	6	male gonad	-0.195384	0.0340481	1.25817	0.117068	0.00260412	0.103766	0.138472	0.136967	1.25818	0.0403052	1.51356	0.136351	197.241	11.1498	0.192198	5	17	1.9762e-14	4.83773e-11
7508	AM866833	0	6	0	1.12514	0.112523	1.65376	0.0779267	1.07107	0.0544294	1.18747	0.0488802	1.38523	0.109761	1.7061	0.0506991	48.9716	1.49886	0.104063	5	17	1.68188e-09	3.01561e-06
21447	AM867021	(sp:O09032) ELAV-like protein 4 OS=Rattus norvegicus GN=Elavl4 PE=1 SV=1	6	0	1.10612	0.0271592	2.13345	0.120612	1.54118	0.130279	1.62754	0.0686451	1.7411	0.0853441	2.07026	0.0954009	63.147	2.83754	0.15278	5	17	2.23879e-10	4.4328e-07
28658	AM867049	0	6	0	-0.731502	0.231465	0.718731	0.0379485	-0.889887	0.121052	-0.8412	0.0952824	-0.229723	0.290611	0.061837	0.255317	45.2022	7.98637	0.600715	5	17	3.15073e-09	5.46336e-06
22213	AM867127	0	6	male gonad	0.0786705	0.0704179	1.4461	0.0277028	0.411899	0.128442	0.540568	0.089754	0.861406	0.0777105	1.34215	0.0309354	186.322	5.79717	0.105787	5	17	3.18634e-14	7.77786e-11
13951	AM867236	0	6	0	-0.5473	0.334776	2.05217	0.106118	-0.178811	0.11769	0.0307601	0.101411	1.33936	0.170163	1.65519	0.133985	142.907	23.2931	0.55418	5	17	2.87548e-13	6.84939e-10
41808	AM867270	0	6	male gonad	-0.401992	0.244864	1.35659	0.469179	-0.111018	0.0616089	-0.0155444	0.196103	1.07935	0.348989	1.51183	0.102328	37.7651	13.7956	1.24202	5	17	1.26936e-08	1.97004e-05
9209	AM867620	0	6	male gonad	-0.513191	0.141315	1.38684	0.10844	-0.233593	0.0869858	-0.143939	0.0912084	0.813254	0.094385	1.15084	0.0820113	240.401	12.7864	0.180839	5	17	3.77476e-15	9.30478e-12
3031	AM867701	0	6	male gonad	-0.305923	0.142195	1.34226	0.102859	0.205326	0.176251	0.446292	0.0661595	1.26225	0.0966853	1.5415	0.0295888	165.31	10.6987	0.220045	5	17	8.60423e-14	2.08394e-10
7971	AM867709	0	6	male gonad	-0.905352	0.0939182	0.448666	0.224948	-0.757605	0.0693387	-0.624061	0.0525423	0.194968	0.253686	0.662071	0.0774949	88.6599	9.06681	0.347701	5	17	1.44743e-11	3.14382e-08
32810	AM867757	0	6	0	-0.690975	0.0336946	1.71224	0.0752476	-0.643326	0.227087	-0.250099	0.358758	1.52308	0.06968	1.74465	0.18846	142.298	28.3543	0.677482	5	17	2.97873e-13	7.08639e-10
28536	AM853911	0	6	0	1.19088	0.0738333	1.68415	0.061499	1.03247	0.0771277	1.07838	0.0519672	1.31055	0.119957	1.62746	0.103564	45.6783	1.53969	0.114604	5	17	2.90299e-09	5.06862e-06
5238	AM868331	0	6	male gonad	0.175771	0.0744648	1.39605	0.11874	0.464808	0.089011	0.54161	0.0505291	1.21746	0.141561	1.62191	0.0533739	164.83	6.73796	0.138986	5	17	8.81517e-14	2.13415e-10
32582	AM868390	0	6	0	-0.591978	0.268384	0.92817	0.0615971	-0.30183	0.192856	-0.212437	0.133642	0.888767	0.227813	1.11199	0.078865	72.1237	10.9266	0.515091	5	17	7.70185e-11	1.58812e-07
15756	AM869004	0	6	0	0.547946	0.111564	1.28121	0.132561	0.537197	0.084077	0.674968	0.0887477	0.917463	0.0943838	1.11087	0.085267	37.1515	1.90697	0.17452	5	17	1.43959e-08	2.20401e-05
2169	AM869290	(sp:P12370) cAMP-dependent protein kinase catalytic subunit OS=Drosophila melanogaster GN=Pka-C1 PE=1 SV=3	6	0	0.321677	0.0710738	1.04252	0.107546	0.246584	0.0474482	0.261688	0.0509039	0.759994	0.0987541	1.09111	0.0304865	121.107	3.08729	0.0866738	5	17	1.12677e-12	2.61748e-09
9871	CF369133	"(sp:Q25010) Actin, cytoplasmic A3a OS=Helicoverpa armigera GN=actA3a PE=2 SV=1"	6	0	0.666037	0.15658	2.45717	0.0415709	1.42677	0.100258	1.69871	0.199226	2.48176	0.027634	2.50802	0.0349084	157.771	10.8188	0.233148	5	17	1.26676e-13	3.04784e-10
19109	CU682126	0	6	male gonad	1.57546	0.0776239	2.26658	0.0459475	1.4466	0.056273	1.47568	0.0399665	2.12397	0.113733	2.4238	0.0573288	170.605	3.73483	0.0744319	5	17	6.61693e-14	1.60858e-10
26365	CU682136	0	6	0	0.0649888	0.0806032	1.32134	0.0789242	0.509982	0.247892	0.701191	0.0995112	1.02649	0.169844	1.40028	0.0666627	54.6853	5.19932	0.323262	5	17	7.03854e-10	1.31339e-06
29683	AM854282	0	6	male gonad	0.333194	0.0658331	1.15114	0.117718	0.146841	0.055543	0.202804	0.0906588	0.805306	0.0414202	1.06204	0.0716062	124.556	3.93085	0.1073	5	17	8.94063e-13	2.08674e-09
16933	CU984538	0	7	0	1.65404	0.066863	1.54625	0.0462975	1.5523	0.0721131	1.33811	0.0260588	1.43134	0.0811744	1.69693	0.066909	18.5534	0.349729	0.0640894	5	17	2.38336e-06	0.00188047
13634	CU986666	0	7	0	1.07326	0.0439985	0.949458	0.0133055	0.785594	0.114456	0.624555	0.0699843	0.729777	0.0892606	0.879524	0.0830589	17.7132	0.505157	0.0969637	5	17	3.28911e-06	0.00245367
9413	CU987866	0	7	0	1.55808	0.0375461	1.69012	0.0798601	1.38144	0.0610656	1.21177	0.0102507	1.39	0.0858904	1.69068	0.0538124	42.3691	0.726579	0.0583059	5	17	5.21707e-09	8.66033e-06
10315	CU988908	(sp:Q91783) Kinesin-related motor protein Eg5 2 OS=Xenopus laevis PE=2 SV=1	7	0	1.08297	0.0940938	1.07563	0.0887567	0.727153	0.171993	0.312694	0.102348	0.975458	0.115542	1.22448	0.0756497	34.8275	2.19447	0.214233	5	17	2.35984e-08	3.47132e-05
31007	CU988963	0	7	0	1.2826	0.193679	1.56486	0.159217	1.40441	0.110061	0.969369	0.0951797	1.66817	0.103767	1.90878	0.0603531	24.8591	2.0806	0.284565	5	17	2.9381e-07	0.000324072
26456	CU988978	0	7	0	1.64392	0.100605	1.67766	0.0841647	1.5292	0.0995294	1.2538	0.00574009	1.66375	0.119976	1.90295	0.0667058	24.9967	0.908484	0.12357	5	17	2.8217e-07	0.000314055
38983	CU989171	0	7	0	1.23922	0.117481	1.15923	0.0867209	1.08995	0.0772241	0.848173	0.055728	1.13563	0.10678	1.2945	0.0210115	14.2554	0.483436	0.115302	5	17	1.43057e-05	0.00768217
26969	AM855031	0	7	0	0.799681	0.0259305	0.550535	0.0794147	0.58723	0.0895177	0.322001	0.071094	0.372765	0.0775486	0.636462	0.0485959	25.1768	0.586863	0.0792529	5	17	2.67713e-07	0.000299035
34934	CU990675	(sp:Q5TB30) DEP domain-containing protein 1A OS=Homo sapiens GN=DEPDC1A PE=1 SV=1	7	female gonad	0.51819	0.134303	0.237342	0.114537	0.267007	0.118184	-0.20788	0.0363596	0.0326152	0.0424665	0.349693	0.0380883	29.2373	1.26662	0.147295	5	17	8.84695e-08	0.000112976
38066	CU990830	0	7	0	1.4293	0.0729552	1.37384	0.105098	1.31493	0.0181293	1.01635	0.0491136	1.29157	0.147468	1.52435	0.0291362	19.6299	0.596789	0.103367	5	17	1.60457e-06	0.0013687
40230	CU991598	0	7	0	0.329787	0.056197	0.547569	0.0615348	0.293477	0.0803159	0.319229	0.054654	0.610327	0.11275	0.974985	0.106285	42.7463	1.36363	0.108462	5	17	4.86972e-09	8.14216e-06
20944	CU994196	(sp:Q6DEY8) WD repeat-containing protein 67 OS=Xenopus tropicalis GN=wdr67 PE=2 SV=1	7	0	1.58177	0.0841151	1.33436	0.0265537	1.36517	0.103473	0.974901	0.050087	1.26963	0.105825	1.4245	0.0705418	27.4358	0.809465	0.100314	5	17	1.42062e-07	0.000173315
18831	AM855480	0	7	0	1.36519	0.070833	1.36819	0.111637	1.1887	0.119815	0.947321	0.0357089	1.17127	0.0999982	1.38861	0.0679622	14.9105	0.584089	0.133188	5	17	1.06131e-05	0.00609192
40377	CU994555	0	7	0	1.32316	0.0449524	1.39614	0.0517275	1.17682	0.103458	1.05685	0.0456147	1.31123	0.129035	1.62737	0.0691927	25.8093	0.759894	0.100105	5	17	2.2312e-07	0.000255249
43931	CU994637	0	7	0	1.21153	0.0664155	1.10876	0.0515889	0.884392	0.155682	0.765774	0.0483816	0.924053	0.0507566	1.22195	0.0813643	18.9157	0.700789	0.125963	5	17	2.08193e-06	0.00168845
3370	CU995306	(sp:P48380) Transcription factor RFX3 OS=Homo sapiens GN=RFX3 PE=2 SV=2	7	0	0.90133	0.101035	1.00705	0.0402426	0.598847	0.00753674	0.527884	0.0340154	0.880581	0.0899059	1.04239	0.0658964	45.3802	0.911838	0.0683173	5	17	3.05546e-09	5.3104e-06
11707	CU995484	(sp:Q8TAM2) Tetratricopeptide repeat protein 8 OS=Homo sapiens GN=TTC8 PE=1 SV=1	7	0	1.09894	0.0723879	1.20363	0.0414786	0.833462	0.0433552	0.622326	0.0133807	1.05273	0.0911486	1.41945	0.0234326	117.462	1.56574	0.045321	5	17	1.44884e-12	3.34103e-09
40629	CU995701	(sp:Q8TAM2) Tetratricopeptide repeat protein 8 OS=Homo sapiens GN=TTC8 PE=1 SV=1	7	0	0.955344	0.091442	1.08245	0.0676136	0.687648	0.0331261	0.489778	0.0466032	0.952704	0.0794486	1.31925	0.0335216	89.8125	1.70651	0.0646026	5	17	1.30299e-11	2.83401e-08
23403	CU996626	0	7	0	1.3494	0.0909866	1.39195	0.126378	1.19084	0.0900179	0.90156	0.053893	1.04562	0.0511023	1.29937	0.0903108	17.671	0.704052	0.135464	5	17	3.34382e-06	0.00248112
2188	CU997415	0	7	0	1.16811	0.0676646	1.35757	0.0723885	1.00033	0.0757824	0.962096	0.0477466	1.08966	0.0415985	1.22114	0.0557953	22.0692	0.430506	0.0663241	5	17	6.96825e-07	0.000681495
14792	CU998088	0	7	0	1.95263	0.0872937	1.55621	0.151298	1.64167	0.120881	1.17016	0.131506	1.17049	0.354812	1.75364	0.0539145	14.0947	1.85617	0.447756	5	17	1.54176e-05	0.0081559
34953	CU998311	0	7	0	1.23706	0.046847	1.13636	0.0552585	1.10606	0.0825236	0.931075	0.101609	1.06597	0.0688876	1.28692	0.0229235	13.7964	0.317378	0.0782153	5	17	1.77473e-05	0.00906888
5466	CU999215	(sp:Q27746) DNA (cytosine-5)-methyltransferase PliMCI OS=Paracentrotus lividus GN=DNMT PE=2 SV=1	7	0	1.6025	0.130806	1.51417	0.0850082	1.36617	0.0996627	0.902516	0.0670258	1.01662	0.138728	1.36805	0.0796479	28.5071	1.45728	0.173808	5	17	1.06852e-07	0.000133245
26091	CX739594	0	7	0	1.72004	0.0190157	2.02838	0.0655961	1.7581	0.065865	1.6914	0.0207032	2.11375	0.056917	2.32879	0.048487	105.533	1.29823	0.0418258	5	17	3.48965e-12	7.91802e-09
2766	DV736354	0	7	0	1.03177	0.0471555	1.12526	0.089832	0.82687	0.0976059	0.668722	0.0299029	1.11169	0.0386856	1.40049	0.0750878	53.5219	1.29163	0.0820513	5	17	8.34521e-10	1.5447e-06
16313	DV736560	(sp:Q17045) GTP-binding protein AGP-1 OS=Ascaris suum GN=AGP-1 PE=2 SV=1	7	0	0.831356	0.0562283	0.726172	0.0888698	0.727348	0.077967	0.553991	0.0137279	0.698874	0.0478356	0.922019	0.035107	17.5013	0.310156	0.0602543	5	17	3.57431e-06	0.00261997
43395	EE677595	0	7	0	1.52025	0.0619845	1.54554	0.0613871	1.37099	0.178881	0.87498	0.0687795	1.53319	0.0948827	1.81889	0.014744	44.0848	1.96665	0.151676	5	17	3.83041e-09	6.53467e-06
24170	EE677842	0	7	0	1.42646	0.112734	1.23897	0.0991922	1.17859	0.144544	0.778475	0.0560752	1.02115	0.130457	1.24859	0.0789099	17.3296	0.981035	0.192475	5	17	3.82581e-06	0.00276606
18825	ES789731	(sp:Q13099) Intraflagellar transport protein 88 homolog OS=Homo sapiens GN=IFT88 PE=1 SV=2	7	0	0.734223	0.0152203	0.783508	0.0331321	0.756412	0.0335532	0.649819	0.0663988	0.846178	0.0200105	1.01391	0.042029	38.8657	0.30512	0.0266922	5	17	1.01751e-08	1.6097e-05
31413	EW778633	(sp:Q9JL60) Glucocorticoid modulatory element-binding protein 1 OS=Mus musculus GN=Gmeb1 PE=2 SV=1	7	0	1.04233	0.0311681	1.44933	0.0984839	0.742334	0.0485595	0.64187	0.0572294	1.57416	0.0800802	1.71616	0.0804586	163.652	3.90637	0.0811577	5	17	9.34808e-14	2.2613e-10
4160	EW779577	(sp:Q6DJ55) Protein TBRG4 OS=Xenopus tropicalis GN=tbrg4 PE=2 SV=2	7	0	0.989989	0.0603322	0.930966	0.108228	0.835223	0.0297649	0.730984	0.039859	0.85627	0.0690382	1.17784	0.0646454	21.1346	0.469645	0.0755536	5	17	9.5009e-07	0.000877883
43036	FP000172	0	7	0	1.55396	0.0681823	1.52057	0.137363	1.25802	0.0824175	0.932029	0.0540144	1.27138	0.15088	1.4601	0.0738957	22.671	1.0775	0.161595	5	17	5.74051e-07	0.000578643
38859	AM856486	0	7	0	1.23042	0.0722919	1.4678	0.0897114	1.11175	0.0333097	1.0529	0.04502	1.20459	0.0710393	1.34682	0.0564966	22.8457	0.462966	0.0689006	5	17	5.43079e-07	0.000551225
22180	FP001578	predicted protein [Nematostella vectensis]	7	0	1.22632	0.0558635	1.35556	0.0834785	0.975742	0.0865646	0.699608	0.0612562	1.34015	0.101869	1.53792	0.131097	45.1712	1.81108	0.136319	5	17	3.16764e-09	5.48952e-06
11610	FP002661	0	7	0	2.40945	0.0594787	2.42919	0.0461478	2.25081	0.0713841	1.87622	0.0384425	2.26247	0.0789896	2.44927	0.0607182	52.3096	0.927132	0.0602614	5	17	1.00024e-09	1.83144e-06
13303	FP003003	(sp:Q922R1) UPF0183 protein C16orf70 homolog OS=Mus musculus PE=2 SV=1	7	0	1.33983	0.0685439	1.48909	0.0614036	1.22959	0.110033	1.04579	0.0185906	1.43655	0.085429	1.61914	0.0632389	31.092	0.817159	0.0893587	5	17	5.57629e-08	7.46108e-05
20551	FP004345	(sp:P67963) Casein kinase I isoform alpha OS=Xenopus laevis GN=csnk1a1 PE=2 SV=1	7	0	1.83771	0.0761958	1.88081	0.0538471	1.74272	0.0634042	1.55671	0.0354149	1.76525	0.0444198	1.84708	0.0431978	18.2368	0.276144	0.0514832	5	17	2.68709e-06	0.00208518
25029	FP005319	0	7	male gonad	0.664957	0.0511194	1.3504	0.196917	-0.0655431	0.0341691	-0.0666591	0.0993264	0.301534	0.363695	0.43103	0.251735	31.2513	5.62458	0.611928	5	17	5.36567e-08	7.22756e-05
31428	FP005383	0	7	0	1.4256	0.117026	1.46059	0.0746925	1.16505	0.143925	0.8227	0.0544875	1.52125	0.0611527	1.71326	0.0307458	47.2858	1.93576	0.139187	5	17	2.21431e-09	3.92376e-06
28864	FP006506	0	7	0	1.36111	0.137188	1.47206	0.143748	1.13807	0.162432	0.551124	0.105362	1.30875	0.0677582	1.50557	0.108431	30.869	2.50004	0.275362	5	17	5.88689e-08	7.83545e-05
40436	AM857018	(sp:Q9DCL4) Putative S-adenosyl-L-methionine-dependent methyltransferase METT5D1 OS=Mus musculus GN=Mett5d1 PE=2 SV=2	7	0	0.454401	0.0127146	0.228918	0.102611	0.357163	0.0549721	0.0837007	0.0538906	0.181416	0.078987	0.325215	0.0709162	15.2383	0.346966	0.0774158	5	17	9.17542e-06	0.0054502
28463	FP007647	(sp:Q8MQI6) Transcription elongation factor 1 homolog OS=Drosophila melanogaster GN=CG40228 PE=1 SV=1	7	0	1.36403	0.0722167	1.36701	0.0638712	1.3681	0.0525374	1.25505	0.0504411	1.41769	0.0802095	1.61178	0.0272412	16.0311	0.277673	0.0588912	5	17	6.51639e-06	0.00415094
31199	AM857194	(sp:Q39030) Serine/threonine-protein kinase AtPK19 OS=Arabidopsis thaliana GN=ATPK19 PE=2 SV=2	7	0	0.712685	0.0235343	0.62603	0.0673311	0.459389	0.0403733	0.115846	0.0745238	0.617052	0.174955	0.899367	0.0738156	41.8699	1.40853	0.114378	5	17	5.72002e-09	9.42087e-06
37378	FP009606	0	7	0	0.973976	0.0367433	1.24756	0.109632	0.84401	0.101053	0.688135	0.0536962	0.962358	0.161729	1.41168	0.127306	26.459	1.40331	0.180326	5	17	1.85768e-07	0.000217348
17088	FP009642	0	7	0	1.95484	0.0351617	2.05167	0.107873	1.81923	0.118671	1.46792	0.0324495	1.98266	0.012126	2.21167	0.0828601	41.5714	1.28282	0.104918	5	17	6.04655e-09	9.91029e-06
36138	FP011354	(sp:Q14008) Cytoskeleton-associated protein 5 OS=Homo sapiens GN=CKAP5 PE=1 SV=3	7	0	0.709051	0.0653021	0.831695	0.0572478	0.359652	0.0705738	0.082906	0.0207876	0.491568	0.147475	0.720983	0.0729001	53.88	1.55784	0.0983047	5	17	7.91617e-10	1.46845e-06
25133	FP011368	0	7	0	1.82969	0.032413	2.23757	0.0636782	1.79575	0.0247446	1.62708	0.0720731	2.1441	0.0717242	2.42295	0.102089	84.3206	1.84246	0.0742924	5	17	2.17637e-11	4.67702e-08
11303	AM857508	0	7	0	1.62013	0.0892378	1.60325	0.107261	1.35545	0.072697	0.965425	0.0340785	1.61481	0.123691	1.68016	0.0537275	42.7585	1.47142	0.117002	5	17	4.85893e-09	8.12899e-06
35111	AM860549	(sp:Q66I67) Intraflagellar transport protein 20 homolog OS=Danio rerio GN=ift20 PE=2 SV=1	7	0	1.143	0.0984178	1.59758	0.0859306	1.04027	0.0765247	0.846406	0.156596	1.41342	0.159673	1.70766	0.150841	29.1723	2.24451	0.261596	5	17	8.99535e-08	0.000114421
23419	AM237648	(sp:Q801E2) Actin-binding protein anillin OS=Xenopus laevis GN=anln PE=1 SV=1	7	0	2.01166	0.12247	2.06514	0.146508	1.89133	0.0606524	1.47121	0.0284764	2.02734	0.167236	2.08021	0.122439	16.1675	1.06405	0.223769	5	17	6.15217e-06	0.0039497
27615	AM858270	0	7	0	1.14361	0.0493372	1.1884	0.0605255	1.00205	0.0403404	0.909808	0.0420269	1.24431	0.0515529	1.34298	0.0462733	41.7753	0.494084	0.0402124	5	17	5.82131e-09	9.56442e-06
8583	AM858010	0	7	0	1.54482	0.0722148	1.569	0.10763	1.46933	0.105952	1.20995	0.0514563	1.74622	0.053476	1.86775	0.0475842	32.7595	1.00717	0.104531	5	17	3.75802e-08	5.24244e-05
8247	AM860887	(sp:Q96MG7) Melanoma-associated antigen G1 OS=Homo sapiens GN=NDNL2 PE=1 SV=1	7	0	1.50742	0.0871912	1.38782	0.102519	1.3284	0.0550608	1.03443	0.183115	1.13136	0.060305	1.49574	0.0253055	14.0455	0.715577	0.17322	5	17	1.57769e-05	0.00831443
17182	AM855207	(sp:Q174D3) Mediator of RNA polymerase II transcription subunit 19 OS=Aedes aegypti GN=MED19 PE=3 SV=1	7	0	1.90306	0.0413719	1.85555	0.0470137	1.81992	0.0632516	1.59889	0.0621523	1.82076	0.134207	2.08008	0.0801982	18.0506	0.481394	0.0906751	5	17	2.8858e-06	0.00219898
15572	AM861293	(sp:Q96GG9) DCN1-like protein 1 OS=Homo sapiens GN=DCUN1D1 PE=1 SV=1	7	0	1.19257	0.0559357	1.26652	0.0668854	1.20049	0.0530031	1.2417	0.0286354	1.3825	0.040635	1.51395	0.045823	24.1082	0.307003	0.0432969	5	17	3.67571e-07	0.000395138
34087	AM856039	0	7	0	2.16681	0.0531125	2.17737	0.100175	2.07936	0.0473807	1.76512	0.0407423	2.22112	0.0277264	2.44333	0.0313876	60.3985	0.973043	0.0547753	5	17	3.19428e-10	6.23844e-07
32066	AM857509	(sp:Q2TGI5) Probable palmitoyltransferase ZDHHC24 OS=Rattus norvegicus GN=Zdhhc24 PE=2 SV=1	7	male gonad	0.458583	0.0372089	0.646592	0.227594	0.171305	0.045259	0.0516932	0.0749875	0.634081	0.132361	0.839367	0.0670421	26.5732	1.8061	0.231088	5	17	1.79954e-07	0.000212346
24211	AM861092	(sp:O75800) Zinc finger MYND domain-containing protein 10 OS=Homo sapiens GN=ZMYND10 PE=1 SV=2	7	0	0.368082	0.118582	0.424551	0.0652684	0.192712	0.0944896	-0.108049	0.0660035	0.171672	0.238243	0.52858	0.0746739	15.497	1.02584	0.225067	5	17	8.19357e-06	0.0049735
31423	AM859992	(sp:Q9DE46) DNA polymerase alpha catalytic subunit OS=Xenopus laevis GN=pola1 PE=2 SV=1	7	0	1.29495	0.127161	1.26771	0.0433667	1.10645	0.130913	0.700166	0.150899	0.952795	0.1932	1.37732	0.141743	13.9158	1.26389	0.308803	5	17	1.67708e-05	0.00870407
39274	AM862283	0	7	0	1.43141	0.0338665	1.53038	0.0537177	1.34751	0.037489	1.17903	0.0383761	1.47344	0.0596034	1.68411	0.0579343	52.1408	0.581314	0.0379063	5	17	1.0261e-09	1.87675e-06
32432	AM858044	(sp:P62291) Abnormal spindle-like microcephaly-associated protein homolog OS=Macaca fascicularis GN=ASPM PE=2 SV=1	7	0	1.1764	0.0472005	1.14416	0.142553	0.855257	0.113078	0.319167	0.0582551	0.996496	0.0760924	1.18831	0.0664354	53.443	2.21647	0.14101	5	17	8.44321e-10	1.56031e-06
12270	AM864104	0	7	0	1.5913	0.141915	1.76587	0.0485311	1.43081	0.162779	1.10935	0.100926	1.46788	0.00645216	1.61168	0.0840684	17.0752	0.998499	0.19882	5	17	4.2356e-06	0.00296069
29562	BQ427176	0	7	0	1.58694	0.0816354	1.47794	0.0524656	1.37171	0.0995854	1.1603	0.026451	1.49385	0.0852305	1.72928	0.0772605	27.4769	0.747839	0.0925377	5	17	1.4049e-07	0.000171538
41570	AM857283	0	7	0	0.907558	0.041761	0.824567	0.0346677	0.69259	0.0479106	0.505908	0.0437456	0.708458	0.0371359	0.885885	0.0411296	52.3629	0.451212	0.0292979	5	17	9.92229e-10	1.81876e-06
40654	AM858054	0	7	0	1.83726	0.0550617	1.74333	0.0580574	1.78791	0.0288726	1.6084	0.0358191	1.63952	0.019877	1.88331	0.0558004	21.3193	0.223781	0.0356885	5	17	8.9281e-07	0.000838349
4310	AM861240	(sp:Q91XA8) Kelch domain-containing protein 8A OS=Mus musculus GN=Klhdc8a PE=2 SV=1	7	0	0.426591	0.0725281	0.305043	0.0749167	0.141964	0.0935695	-0.0947407	0.0632488	0.157795	0.0694908	0.539141	0.0940296	32.3538	1.01884	0.107068	5	17	4.12985e-08	5.69506e-05
732	AM861298	0	7	0	1.3747	0.0962715	1.47986	0.115946	1.20508	0.0705963	0.89104	0.0360415	1.45244	0.0809862	1.71652	0.0370029	51.0699	1.56528	0.104209	5	17	1.20871e-09	2.19502e-06
11559	AM856681	0	7	0	1.63092	0.0804682	1.52002	0.108378	1.2073	0.150531	0.895903	0.106329	1.17313	0.21223	1.45823	0.0723113	18.898	1.45808	0.262329	5	17	2.09563e-06	0.00169746
1055	AM858080	(sp:Q9HB75) Leucine-rich repeat and death domain-containing protein OS=Homo sapiens GN=LRDD PE=1 SV=2	7	0	1.1354	0.104912	1.39044	0.0542499	0.8935	0.133867	0.620919	0.0804446	1.19295	0.138071	1.56734	0.0455984	49.2496	2.30878	0.159389	5	17	1.60866e-09	2.88754e-06
2934	AM861906	(sp:Q7SXU0) Eukaryotic translation initiation factor 3 subunit J-A OS=Danio rerio GN=eif3ja PE=1 SV=1	7	0	1.97985	0.0812557	1.92802	0.069694	1.8696	0.0559984	1.73973	0.0448667	1.93969	0.0786583	2.15796	0.0323298	19.6067	0.376769	0.0653357	5	17	1.61801e-06	0.00137693
26746	AM857579	(sp:Q3KQF4) Leucine-rich repeat-containing protein 69 OS=Xenopus laevis GN=lrrc69 PE=2 SV=1	7	0	0.818226	0.058783	0.94548	0.0306771	0.725804	0.121439	0.372898	0.138925	0.847889	0.142407	1.04427	0.127782	17.9385	1.08093	0.204876	5	17	3.01331e-06	0.00227505
40381	AM860081	hypothetical protein BRAFLDRAFT_124259 [Branchiostoma floridae]	7	0	1.44016	0.116161	1.44843	0.0886465	1.31929	0.0975976	0.812099	0.0637775	1.6203	0.0586752	1.81643	0.0328982	66.9449	2.26364	0.114966	5	17	1.40221e-10	2.82545e-07
44734	AM860978	(sp:Q5PQ23) Outer dense fiber protein 2 OS=Xenopus laevis GN=odf2 PE=2 SV=1	7	0	0.358821	0.0933833	0.218073	0.0529007	0.0790094	0.0529522	-0.239288	0.0602454	0.250491	0.080448	0.33007	0.0310081	47.6043	0.975684	0.0696854	5	17	2.10074e-09	3.73722e-06
31536	AM857573	(sp:P53809) Phosphatidylcholine transfer protein OS=Rattus norvegicus GN=Pctp PE=2 SV=2	7	0	1.11891	0.0509385	1.05938	0.0551091	0.95761	0.0545732	0.687612	0.0189426	1.23792	0.047232	1.40215	0.0549946	98.4756	1.17132	0.0404413	5	17	6.14808e-12	1.3741e-08
30755	AM866038	(sp:Q1L8G7) GATA zinc finger domain-containing protein 1 OS=Danio rerio GN=gatad1 PE=2 SV=1	7	0	1.51692	0.0352275	1.52636	0.104834	1.37692	0.0269284	1.2371	0.0605964	1.37052	0.0819588	1.6335	0.0552824	18.6352	0.397298	0.0724873	5	17	2.31131e-06	0.00183749
2471	AM857913	(sp:Q497H0) AN1-type zinc finger protein 3 OS=Mus musculus GN=Zfand3 PE=2 SV=1	7	0	1.00197	0.0876871	1.16932	0.141747	0.712864	0.0689603	0.466238	0.030369	0.541368	0.099477	0.614236	0.0700423	37.478	1.48685	0.134887	5	17	1.34603e-08	2.07962e-05
24421	AM859540	(sp:Q5BJF6) Outer dense fiber protein 2 OS=Homo sapiens GN=ODF2 PE=1 SV=1	7	0	1.26004	0.0183332	1.18747	0.0405536	0.920552	0.0692757	0.654454	0.103895	1.18174	0.0551406	1.14694	0.101799	39.1216	1.03433	0.0898918	5	17	9.67282e-09	1.53508e-05
15248	AM857775	(sp:Q15291) Retinoblastoma-binding protein 5 OS=Homo sapiens GN=RBBP5 PE=1 SV=2	7	0	0.984836	0.0507736	1.08199	0.0544132	0.785726	0.0984497	0.56828	0.0585587	0.873255	0.102569	1.1756	0.020342	41.5128	0.955563	0.0782629	5	17	6.11304e-09	1.00009e-05
12843	AM866627	0	7	0	0.945314	0.121445	0.579708	0.166464	0.800943	0.189258	0.321314	0.0466065	0.366428	0.0800246	0.755485	0.0421006	15.3982	1.17513	0.259474	5	17	8.55376e-06	0.00514936
39754	CU999609	(sp:Q6P1U0) Protein downstream neighbor of son homolog OS=Xenopus tropicalis GN=donson PE=2 SV=1	7	0	1.7036	0.0703126	1.51191	0.0577475	1.47373	0.0992013	0.973473	0.0180233	1.27893	0.177532	1.57654	0.00917445	37.8794	1.32155	0.118621	5	17	1.24021e-08	1.92729e-05
42608	AM853986	(sp:P13668) Stathmin OS=Rattus norvegicus GN=Stmn1 PE=1 SV=2	7	0	1.11249	0.108851	1.60349	0.112866	0.947417	0.0436041	0.766583	0.0693089	1.68925	0.182634	1.88297	0.0387512	81.3647	3.95079	0.165092	5	17	2.90704e-11	6.18618e-08
11636	CU987660	0	7	0	1.40091	0.0952739	1.3213	0.148495	1.0149	0.161317	0.568399	0.179125	0.963384	0.187532	1.03018	0.0951824	16.23	1.74342	0.365226	5	17	5.99274e-06	0.0038833
23303	AM857564	0	7	0	1.04375	0.057999	0.976514	0.1175	0.851542	0.102574	0.585839	0.0271541	0.953125	0.103917	1.22418	0.055364	26.505	0.904908	0.11608	5	17	1.83401e-07	0.000215496
42902	AM865002	0	7	0	1.40721	0.0793872	1.17514	0.0460922	1.28573	0.0836517	0.883209	0.0645546	1.11463	0.0190491	1.37574	0.0219548	41.7101	0.747676	0.0609469	5	17	5.89234e-09	9.67523e-06
16127	AM868574	(sp:P51892) DNA ligase 1 OS=Xenopus laevis GN=lig1 PE=2 SV=1	7	0	1.35216	0.139097	1.26357	0.0908594	1.27722	0.118744	0.819548	0.054155	1.21992	0.14139	1.38727	0.0467114	15.9019	0.843911	0.180438	5	17	6.88371e-06	0.00431608
21694	BQ426909	(sp:Q3B7G7) Protein SFRS12IP1 OS=Danio rerio GN=sfrs12ip1 PE=2 SV=1	7	0	1.08517	0.0938207	1.09519	0.12015	1.02358	0.0300258	0.788744	0.0349706	1.17017	0.0657989	1.40831	0.0280191	31.4366	0.805355	0.0871024	5	17	5.1318e-08	6.93307e-05
15214	AM858588	(sp:Q32NR3) DNA-binding protein RFX2 OS=Xenopus laevis GN=rfx2 PE=2 SV=1	7	0	0.632716	0.0751088	0.655821	0.0295967	0.268631	0.00829116	0.165275	0.0145282	0.582566	0.0713498	0.708513	0.0675716	78.6583	1.02419	0.0442706	5	17	3.82327e-11	8.07476e-08
31281	AM858595	0	7	0	1.16809	0.0906658	1.18882	0.0566947	0.880856	0.0483931	0.687839	0.0610822	1.18984	0.149249	1.37837	0.0524912	40.1642	1.24437	0.105339	5	17	7.89476e-09	1.27658e-05
5418	AM864971	(sp:Q08AX9) Uncharacterized protein KIAA1841 homolog OS=Xenopus laevis PE=2 SV=1	7	0	0.476008	0.130322	0.765017	0.0895169	0.377258	0.0747202	0.131343	0.0488117	0.626636	0.103633	0.801772	0.0884439	30.3656	1.2846	0.143835	5	17	6.66137e-08	8.77969e-05
10332	AM853630	0	7	0	1.16286	0.0560257	1.28321	0.147811	1.00212	0.159345	0.363722	0.356598	1.35832	0.311704	1.57342	0.0679599	15.8304	3.44915	0.740795	5	17	7.09674e-06	0.00440708
29651	AM858745	0	7	male gonad	0.482335	0.0814572	0.848296	0.0887055	0.377261	0.100488	-0.0724772	0.0639387	0.14672	0.0699396	0.43618	0.0909366	53.9312	1.91394	0.120661	5	17	7.85691e-10	1.45824e-06
14928	DV736933	0	7	0	1.79758	0.0640449	1.74257	0.0498728	1.7111	0.116935	1.41776	0.107211	1.63477	0.070545	1.93617	0.0901969	15.6878	0.598124	0.129631	5	17	7.54446e-06	0.00461721
8674	CX069346	(sp:Q6QLW4) Cytochrome c OS=Pectinaria gouldii PE=3 SV=1	7	0	2.4557	0.0732078	2.45681	0.0418096	2.41424	0.0516294	2.22044	0.0456806	2.49103	0.0435854	2.50634	0.0326931	17.155	0.214867	0.042585	5	17	4.10199e-06	0.00290831
22275	BQ427333	(sp:Q9BPU9) B9 domain-containing protein 2 OS=Homo sapiens GN=B9D2 PE=2 SV=2	7	0	1.34269	0.113093	1.54467	0.0468025	1.22878	0.0768547	1.21885	0.0386393	1.7784	0.0693836	1.93763	0.0868109	58.7012	1.71575	0.099377	5	17	4.00887e-10	7.685e-07
17709	AM856856	(sp:Q8CFP6) DnaJ homolog subfamily C member 27 OS=Mus musculus GN=Dnajc27 PE=2 SV=1	7	0	0.589367	0.0127165	0.865944	0.123842	0.561615	0.171052	0.266908	0.0525421	0.810446	0.0931207	0.970668	0.0388475	26.8241	1.29722	0.164425	5	17	1.67879e-07	0.000200112
37296	AM861774	(sp:Q3T0C9) Synaptojanin-2-binding protein OS=Bos taurus GN=SYNJ2BP PE=2 SV=1	7	0	2.30408	0.0454845	2.45635	0.0429373	2.25764	0.0585828	2.00046	0.0371237	2.49042	0.0446902	2.50418	0.0351451	72.3214	0.7204	0.0338677	5	17	7.53383e-11	1.55498e-07
9436	AM860914	(sp:O49326) Nitrile-specifier protein 2 OS=Arabidopsis thaliana GN=NSP2 PE=2 SV=1	7	0	1.0219	0.133239	0.6141	0.0712478	0.858636	0.120016	0.455392	0.0682749	0.611909	0.148227	0.994064	0.178022	13.5352	1.05376	0.264701	5	17	2.01125e-05	0.00997581
6205	AM865392	(sp:O14578) Citron Rho-interacting kinase OS=Homo sapiens GN=CIT PE=1 SV=2	7	0	0.898745	0.192994	1.07663	0.0966065	0.774346	0.110235	0.569845	0.0328142	1.11908	0.0983429	1.1544	0.0852172	15.6244	1.01353	0.220552	5	17	7.75341e-06	0.00472183
30230	AM865924	(sp:Q6NXP6) Pyrroline-5-carboxylate reductase-like protein C14orf148 OS=Homo sapiens GN=C14orf148 PE=2 SV=2	7	male gonad	0.624674	0.051509	1.10101	0.104183	0.476476	0.120181	0.241402	0.0500194	1.10492	0.0649475	1.37472	0.0156464	126.856	3.75079	0.100529	5	17	7.6894e-13	1.80009e-09
7399	AM858900	0	7	0	1.09857	0.0893645	0.938685	0.126296	0.758647	0.0871743	0.290738	0.0619247	0.686518	0.0723248	1.00557	0.0611852	44.8363	1.68538	0.127805	5	17	3.35721e-09	5.79455e-06
15906	AM859011	(sp:Q5VVX9) Ubiquitin-conjugating enzyme E2 U OS=Homo sapiens GN=UBE2U PE=1 SV=1	7	0	1.2309	0.0733841	1.57802	0.0973727	1.12068	0.061947	0.964727	0.0444703	1.64969	0.135564	1.89165	0.0956638	66.3678	2.46449	0.126255	5	17	1.50306e-10	3.02115e-07
8053	AM857512	(sp:P54279) Mismatch repair endonuclease PMS2 OS=Mus musculus GN=Pms2 PE=1 SV=1	7	0	1.50587	0.104241	1.37158	0.0619002	1.37556	0.0395899	1.10931	0.0544963	1.12973	0.0893325	1.43925	0.081541	18.2257	0.501812	0.0936127	5	17	2.69849e-06	0.00209133
11522	BQ426476	0	7	0	2.04048	0.0485041	2.01712	0.0394226	1.79603	0.0986762	1.73272	0.0606463	2.08379	0.158893	2.10761	0.0465994	15.1676	0.486136	0.108973	5	17	9.46603e-06	0.00560389
30090	BQ426552	0	7	0	1.68214	0.0729077	2.04575	0.063406	1.60436	0.137364	1.52956	0.136254	1.90514	0.0741191	2.20354	0.129769	23.8022	1.41284	0.201816	5	17	4.03382e-07	0.000426374
9974	CX069032	0	7	0	1.5206	0.173947	1.88098	0.116031	1.45475	0.186742	1.10177	0.048387	1.8372	0.0179306	1.9801	0.206744	19.7193	2.15564	0.371676	5	17	1.55394e-06	0.00133483
27120	AM865610	(sp:Q4G163) F-box only protein 43 OS=Homo sapiens GN=FBXO43 PE=1 SV=3	7	0	1.53669	0.0704785	1.56465	0.0633764	1.38555	0.137788	0.764466	0.130067	1.97256	0.0436534	2.0322	0.064534	90.721	4.02816	0.150965	5	17	1.20046e-11	2.62061e-08
18140	CU994437	(sp:Q24K09) DNA (cytosine-5)-methyltransferase 1 OS=Bos taurus GN=DNMT1 PE=2 SV=1	7	0	2.26722	0.144248	2.11816	0.0586646	2.12641	0.120107	1.65069	0.0713309	1.85089	0.109577	2.1727	0.106688	18.75	1.04476	0.189449	5	17	2.21417e-06	0.00177134
28412	AM860848	0	7	0	0.591754	0.0868167	0.861377	0.132288	0.482968	0.154269	0.252797	0.0156545	0.453625	0.104983	0.646576	0.0883165	14.6657	0.831139	0.192686	5	17	1.18515e-05	0.00664871
4874	AM859146	(sp:Q5H7C0) Cell division cycle protein 20 homolog OS=Sus scrofa GN=CDC20 PE=2 SV=1	7	0	0.265802	0.173544	0.81248	0.131619	0.0683132	0.146055	0.194674	0.103926	1.07529	0.110148	0.994755	0.21411	30.9892	3.6505	0.400516	5	17	5.71708e-08	7.62658e-05
31613	CU984250	0	7	0	1.18203	0.0928079	0.871183	0.0871488	1.051	0.105034	0.61216	0.0298322	0.832058	0.0658296	1.01278	0.0589379	25.8495	0.78673	0.103479	5	17	2.20577e-07	0.000252781
14632	AM869223	0	7	0	1.66604	0.0540757	1.41749	0.0190515	1.47998	0.106228	1.02945	0.0768639	1.31776	0.147634	1.59609	0.113214	24.2171	1.02198	0.143482	5	17	3.55692e-07	0.000384147
5591	AM862640	(sp:Q3SWX9) Double-strand-break repair protein rad21 homolog OS=Bos taurus GN=RAD21 PE=2 SV=1	7	0	0.72194	0.0285365	0.715781	0.0979545	0.480618	0.062289	0.123396	0.0379315	0.496755	0.0799706	0.744628	0.0412924	59.3091	1.13542	0.0650902	5	17	3.69304e-10	7.14603e-07
42385	AM859098	RAD51-associated protein 1 [Salmo salar]	7	0	0.780668	0.111118	0.919979	0.124292	0.662351	0.0967346	0.361888	0.0474284	0.697287	0.0618321	1.03486	0.0764426	25.7249	1.08487	0.143385	5	17	2.28559e-07	0.000261015
30270	AM863035	0	7	0	1.25291	0.100452	1.25335	0.0506439	1.13128	0.141991	0.651549	0.121671	1.52674	0.0533859	1.66914	0.0387392	53.6784	2.41655	0.153065	5	17	8.15451e-10	1.51103e-06
1653	AM859576	0	7	0	1.24907	0.08354	1.46805	0.0718983	1.06198	0.0462018	0.929438	0.0550838	1.37167	0.0967619	1.66262	0.0238695	67.4801	1.43666	0.0723864	5	17	1.3154e-10	2.65578e-07
39045	AM859958	0	7	0	1.11354	0.0516465	1.04834	0.0817965	0.78174	0.116404	0.714969	0.0530874	0.834339	0.0963299	1.2714	0.133149	21.1668	0.927125	0.148923	5	17	9.39802e-07	0.000871196
40187	AM860149	0	7	0	0.709381	0.0401365	0.505024	0.0732151	0.403456	0.0608209	-0.147436	0.0433234	0.180131	0.104216	0.516548	0.0321618	98.1404	1.80312	0.0624676	5	17	6.32183e-12	1.40977e-08
14426	AM860168	0	7	0	1.30548	0.135346	1.07513	0.0912672	1.05949	0.108096	0.616089	0.0447234	0.907902	0.0633821	1.2071	0.0593545	28.5031	1.17033	0.139603	5	17	1.06966e-07	0.000133279
36234	AM860204	(sp:Q86SX3) Uncharacterized protein C14orf80 OS=Homo sapiens GN=C14orf80 PE=2 SV=2	7	0	0.560276	0.102962	0.835986	0.119978	0.407331	0.0338345	0.393172	0.0794256	0.831577	0.0342362	1.14407	0.124197	39.8183	1.70945	0.145966	5	17	8.44051e-09	1.3547e-05
34071	AM860397	(sp:A6NN14) Zinc finger protein 729 OS=Homo sapiens GN=ZNF729 PE=2 SV=3	7	0	0.885717	0.094712	0.882983	0.0710607	0.659168	0.0816434	0.532052	0.0678364	0.786568	0.0678676	1.01367	0.0334812	23.2858	0.605685	0.0884372	5	17	4.73028e-07	0.000488165
16770	AM860668	(sp:Q9NVR7) TBCC domain-containing protein 1 OS=Homo sapiens GN=TBCCD1 PE=1 SV=1	7	0	0.696987	0.129547	0.600226	0.090276	0.372047	0.0914307	0.110951	0.117004	0.303406	0.0653434	0.627379	0.0789245	20.362	1.00715	0.168171	5	17	1.23845e-06	0.00109479
13469	AM861450	(sp:Q96S82) Ubiquitin-like protein 7 OS=Homo sapiens GN=UBL7 PE=1 SV=2	7	0	0.848032	0.0388306	1.03038	0.0818986	0.778982	0.132995	0.734527	0.0796628	0.989814	0.0581386	1.24056	0.0855082	19.1693	0.707247	0.125442	5	17	1.8963e-06	0.00157203
9183	AM861777	(sp:Q6QLW4) Cytochrome c OS=Pectinaria gouldii PE=3 SV=1	7	0	2.13968	0.062645	2.18789	0.0820151	1.97216	0.0653874	1.78096	0.0606992	2.31899	0.0618712	2.46356	0.0179677	60.7679	1.15203	0.0644569	5	17	3.04263e-10	5.95138e-07
21004	AM862046	0	7	0	1.82946	0.0857685	1.99904	0.0611519	1.79573	0.0891116	1.51736	0.0544086	2.00123	0.0767505	2.23075	0.0312907	48.645	1.15474	0.0807095	5	17	1.77268e-09	3.16778e-06
362	AM862158	(sp:Q96QU8) Exportin-6 OS=Homo sapiens GN=XPO6 PE=1 SV=1	7	0	0.244933	0.0480498	0.268879	0.0425495	-0.0844388	0.045782	-0.209042	0.0411841	0.0825336	0.101058	0.452794	0.0991524	55.2635	1.19716	0.0736531	5	17	6.47549e-10	1.21092e-06
19732	AM862305	0	7	0	1.82912	0.0510356	1.7399	0.108885	1.67807	0.0501758	1.38049	0.0284409	1.78774	0.0702562	1.97373	0.0714732	34.0487	0.78671	0.0785584	5	17	2.80345e-08	4.03978e-05
17677	AM862616	0	7	0	0.81526	0.14044	0.564111	0.0723088	0.555567	0.125608	0.176057	0.0697837	0.482276	0.116271	0.625742	0.0375739	17.7122	0.875558	0.16807	5	17	3.29033e-06	0.00245129
16883	AM862737	0	7	0	0.947806	0.168473	1.15861	0.177855	0.729904	0.125755	0.370679	0.0594943	0.695351	0.0966419	1.19841	0.141922	20.9234	1.95212	0.317214	5	17	1.02065e-06	0.000928788
37501	AM862862	(sp:Q7YR39) Putative pre-mRNA-splicing factor ATP-dependent RNA helicase DHX16 OS=Pan troglodytes GN=DHX16 PE=3 SV=1	7	0	0.38829	0.0632594	0.251291	0.106892	0.14309	0.0604765	-0.0683725	0.0951919	-0.00396466	0.0434442	0.240952	0.0854073	17.2228	0.557703	0.110097	5	17	3.99218e-06	0.00285441
28120	AM862982	0	7	0	1.01292	0.0763504	1.22157	0.0470106	0.939948	0.0396175	0.821808	0.133052	1.04721	0.156958	1.28087	0.0389596	14.8453	0.592767	0.13576	5	17	1.0928e-05	0.0061962
23602	AM863051	0	7	0	1.79278	0.054338	1.88319	0.0742035	1.67747	0.0760815	1.29497	0.0267691	1.67983	0.0733733	1.8586	0.0389512	52.4409	0.928668	0.0602101	5	17	9.80627e-10	1.79847e-06
27315	AM863339	(sp:Q2TBP2) Histone H4 transcription factor OS=Bos taurus GN=HINFP PE=2 SV=1	7	0	0.538032	0.0746051	0.484169	0.10213	0.355003	0.0550839	0.247313	0.048478	0.568067	0.0263106	0.696331	0.0996941	17.9355	0.502954	0.0953439	5	17	3.01677e-06	0.00227464
21823	AM863343	0	7	0	0.354898	0.0381196	0.548435	0.0817511	-0.0213185	0.0561425	-0.311608	0.0655394	0.255436	0.108802	0.49941	0.0760641	84.5765	2.18367	0.0877842	5	17	2.12346e-11	4.56543e-08
41820	AM863465	(sp:Q0VA03) Polycomb protein suz12 OS=Xenopus tropicalis GN=suz12 PE=2 SV=1	7	0	0.338985	0.0798519	0.132675	0.0811898	0.133979	0.0771248	-0.0458192	0.0487584	0.00468161	0.0337376	0.355413	0.0359825	25.6498	0.5284	0.0700418	5	17	2.33524e-07	0.000265517
17	AM863560	(sp:Q7ZVC2) Clusterin-associated protein 1 homolog OS=Danio rerio GN=cluap1 PE=2 SV=2	7	0	1.42891	0.0807234	1.59599	0.125614	1.32881	0.0779576	1.16913	0.0679056	1.57591	0.0543189	1.765	0.145255	18.0692	0.893624	0.16815	5	17	2.86527e-06	0.00218907
24334	AM863869	(sp:P52429) Diacylglycerol kinase epsilon OS=Homo sapiens GN=DGKE PE=1 SV=1	7	0	0.903514	0.0164937	0.85655	0.0573257	0.612609	0.0842015	0.364237	0.0212914	0.438445	0.0150325	0.758635	0.065054	68.5223	0.936186	0.0464525	5	17	1.16304e-10	2.35399e-07
5417	AM863994	(sp:Q75NR7) ATP-dependent DNA helicase Q4 OS=Mus musculus GN=Recql4 PE=2 SV=2	7	0	0.568708	0.0719071	0.658896	0.0501126	0.389656	0.0486925	0.151541	0.0712332	0.343734	0.0855981	0.597701	0.068423	33.1366	0.72199	0.0740803	5	17	3.44572e-08	4.84813e-05
5107	AM864085	0	7	0	0.330508	0.0542032	0.258002	0.052919	0.0103802	0.117567	-0.147898	0.0794883	-0.0564312	0.182248	0.348698	0.0760216	18.7063	0.888013	0.161403	5	17	2.25063e-06	0.00179825
21559	AM864093	0	7	0	0.636445	0.0700581	0.889196	0.090345	0.394896	0.100171	0.185655	0.0203666	0.521516	0.110668	0.854558	0.108229	38.2801	1.46583	0.130194	5	17	1.14376e-08	1.78769e-05
26618	AM864213	0	7	male gonad	0.497111	0.0811336	0.694894	0.247818	0.315789	0.038796	0.238	0.0599623	0.772065	0.17187	1.00759	0.0810752	19.0407	1.66936	0.29809	5	17	1.98805e-06	0.00162623
43292	AM864225	(sp:Q9D9P2) Coiled-coil domain-containing protein 103 OS=Mus musculus GN=Ccdc103 PE=2 SV=1	7	0	0.774026	0.0377275	1.11158	0.0950053	0.708916	0.0614028	0.681519	0.0417344	1.02781	0.111908	1.34204	0.119305	40.5271	1.3783	0.115632	5	17	7.364e-09	1.19371e-05
14427	AM864265	(sp:A2AM05) Centlein OS=Mus musculus GN=Cntln PE=1 SV=1	7	0	1.25347	0.0243853	1.37492	0.137623	1.02365	0.08272	0.812456	0.0359812	1.3565	0.087729	1.48745	0.0645135	38.6193	1.25961	0.110895	5	17	1.06862e-08	1.682e-05
9713	AM864416	(sp:Q92630) Dual specificity tyrosine-phosphorylation-regulated kinase 2 OS=Homo sapiens GN=DYRK2 PE=1 SV=3	7	0	0.665955	0.0781327	1.06146	0.0444228	0.423133	0.0587542	0.196833	0.059674	0.530133	0.119625	0.687659	0.0726288	64.0317	1.68965	0.0897184	5	17	2.00295e-10	3.98386e-07
25607	AM864428	0	7	0	0.30532	0.0830715	0.446425	0.10045	0.27815	0.07012	-0.0302639	0.0633411	0.545944	0.0195137	0.8028	0.0599611	59.0806	1.55187	0.0893075	5	17	3.80836e-10	7.35014e-07
8273	AM864694	0	7	0	1.38058	0.0816601	1.36006	0.0296195	1.12721	0.0671338	0.92121	0.0529346	1.17663	0.081772	1.3838	0.0281303	38.6161	0.684998	0.0603114	5	17	1.06929e-08	1.682e-05
28893	AM864745	GK24680 [Drosophila willistoni]	7	0	1.02278	0.0622518	0.785055	0.0438208	0.876353	0.0678308	0.640697	0.0528907	0.753591	0.0710619	0.930313	0.00549504	24.9228	0.364842	0.0497722	5	17	2.88356e-07	0.00031921
35711	AM864751	0	7	0	1.59041	0.0978074	1.52584	0.0627803	1.42411	0.0722937	1.01924	0.0645521	1.43354	0.0591402	1.73101	0.0915076	39.2167	1.16288	0.100819	5	17	9.4935e-09	1.51137e-05
40144	AM864999	0	7	0	0.420569	0.121391	0.627222	0.0765264	0.275061	0.0411009	0.105998	0.0633548	0.39791	0.092331	0.806537	0.0569398	39.8836	1.23947	0.105662	5	17	8.3344e-09	1.34017e-05
26505	AM865101	0	7	0	1.65882	0.0945126	1.96335	0.0368492	1.7016	0.05538	1.65666	0.0386266	1.80226	0.0607028	1.91163	0.0650207	18.3875	0.349368	0.0646011	5	17	2.53747e-06	0.00199445
20732	AM866080	0	7	0	1.54415	0.104929	1.34492	0.164153	1.33735	0.191254	0.977599	0.0747257	1.53684	0.0586248	1.81789	0.158745	16.5198	1.56856	0.322829	5	17	5.31198e-06	0.00352716
40599	AM866351	0	7	0	0.406209	0.0466722	0.511377	0.0597823	0.326687	0.0566284	0.250036	0.0493467	0.577554	0.0224593	0.690314	0.0288365	47.1564	0.522683	0.0376857	5	17	2.2624e-09	3.99993e-06
13676	AM853778	(sp:A4QNN3) Ubiquitin carboxyl-terminal hydrolase 30 OS=Xenopus tropicalis GN=usp30 PE=2 SV=1	7	0	1.2981	0.118148	1.34776	0.0723855	0.922601	0.0875498	0.772164	0.0227051	1.05875	0.0694406	1.21151	0.0488189	34.8083	1.01283	0.0989311	5	17	2.36981e-08	3.48125e-05
42800	AM866542	(sp:Q15018) BRISC complex subunit Abro1 OS=Homo sapiens GN=FAM175B PE=1 SV=2	7	0	0.921286	0.0864093	1.05068	0.0879422	0.894007	0.0838866	0.722952	0.0499212	0.929853	0.0406635	1.25025	0.039482	25.6778	0.620586	0.082172	5	17	2.3166e-07	0.000263629
25229	AM866709	"(sp:Q8JZN5) Acyl-CoA dehydrogenase family member 9, mitochondrial OS=Mus musculus GN=Acad9 PE=2 SV=1"	7	0	1.48024	0.0882785	1.39919	0.0696211	1.17246	0.05127	1.00562	0.0507896	1.36499	0.0267038	1.50238	0.0353864	43.3806	0.74931	0.058728	5	17	4.34245e-09	7.30834e-06
27320	AM866784	(sp:Q8C2S5) F-box/LRR-repeat protein 5 OS=Mus musculus GN=Fbxl5 PE=2 SV=2	7	0	-0.0571486	0.102055	0.160255	0.0822926	-0.276042	0.0903501	-0.462076	0.0780461	0.00469475	0.120635	0.195671	0.044694	34.0393	1.29573	0.129423	5	17	2.80933e-08	4.04543e-05
24880	AM866869	PREDICTED: hypothetical protein [Nasonia vitripennis]	7	0	0.448354	0.0810532	0.335804	0.0462527	0.0907718	0.124817	-0.156583	0.0619423	-0.0434318	0.0893178	0.240317	0.0389757	33.2656	1.02622	0.104888	5	17	3.34564e-08	4.71735e-05
42448	AM866873	(sp:Q8C2S5) F-box/LRR-repeat protein 5 OS=Mus musculus GN=Fbxl5 PE=2 SV=2	7	0	0.236856	0.158412	0.402095	0.114982	0.263058	0.0608442	0.0428982	0.0346935	0.426349	0.0995013	0.593519	0.0784981	14.3263	0.707673	0.167949	5	17	1.3844e-05	0.00750345
7216	AM867059	0	7	0	1.07544	0.0759806	1.31149	0.0959511	0.911427	0.0415214	0.826277	0.0602078	1.07603	0.154733	1.38038	0.0882303	24.1534	0.939312	0.132224	5	17	3.62585e-07	0.000390867
11223	AM853805	(sp:Q68FQ4) Uncharacterized protein C11orf70 homolog OS=Rattus norvegicus PE=2 SV=1	7	0	0.734796	0.168155	0.945383	0.129646	0.533158	0.036624	0.448816	0.0527203	0.917084	0.109253	1.36998	0.0517961	41.8588	2.21034	0.179536	5	17	5.73181e-09	9.43456e-06
31687	AM867297	(sp:Q66JT5) Tubulin polyglutamylase complex subunit 2 OS=Mus musculus PE=1 SV=2	7	0	0.78238	0.0845256	1.11268	0.0447587	0.617866	0.0327379	0.376136	0.016452	0.897199	0.0636579	1.23439	0.0621557	132.899	1.99996	0.0511657	5	17	5.23803e-13	1.23408e-09
8764	AM867325	(sp:Q6JE36) Protein NDRG1 OS=Rattus norvegicus GN=Ndrg1 PE=1 SV=1	7	0	1.47017	0.0359813	1.75249	0.133736	1.35659	0.0617647	1.28284	0.0131282	1.6398	0.0957717	1.97548	0.0537483	47.7786	1.35625	0.096513	5	17	2.04135e-09	3.63565e-06
29436	AM867611	(sp:Q5BJQ6) Cleavage stimulation factor 50 kDa subunit OS=Rattus norvegicus GN=Cstf1 PE=2 SV=1	7	0	0.777892	0.0454227	0.731945	0.033591	0.691242	0.0455519	0.55267	0.0208023	0.713909	0.0297491	0.905578	0.0825664	22.9204	0.265064	0.0393195	5	17	5.30425e-07	0.000539973
13608	AM867966	(sp:Q7Z4L9) Leucine-rich repeat-containing protein 67 OS=Homo sapiens GN=LRRC67 PE=2 SV=2	7	0	0.36588	0.0688907	0.399489	0.0997344	0.101601	0.0804658	-0.185349	0.0430592	0.157206	0.0638261	0.473284	0.0121229	52.3523	1.19569	0.0776536	5	17	9.93808e-10	1.82066e-06
3999	AM868319	0	7	0	1.07676	0.015491	1.24491	0.127885	0.77694	0.104838	0.695185	0.0880885	1.03862	0.0834348	1.08985	0.101019	19.5459	0.865611	0.150573	5	17	1.65381e-06	0.00140574
41126	AM868464	0	7	0	1.05412	0.117586	1.2268	0.0718501	0.830073	0.158195	0.526039	0.104011	0.844827	0.0585376	1.00131	0.0579316	21.4546	1.14479	0.181421	5	17	8.53324e-07	0.000810658
39914	AM868896	PREDICTED: hypothetical protein [Strongylocentrotus purpuratus]	7	0	0.361324	0.233006	0.51784	0.0313125	-0.033267	0.106019	-0.3494	0.0646343	0.147514	0.176654	0.535575	0.0953948	26.9477	2.39188	0.301783	5	17	1.62264e-07	0.000194068
45204	AM869341	(sp:Q9NRZ9) Lymphoid-specific helicase OS=Homo sapiens GN=HELLS PE=1 SV=1	7	0	0.961492	0.0543106	0.874878	0.0823193	0.685907	0.0906203	0.543288	0.0362172	0.68353	0.152387	1.01062	0.036846	20.7416	0.660472	0.108266	5	17	1.0861e-06	0.000978577
31076	AM869504	0	7	male gonad	-0.0707091	0.0904013	0.408415	0.154311	-0.21153	0.0992758	-0.56379	0.053712	-0.324981	0.181132	-0.0762065	0.0633801	33.3585	2.07847	0.211844	5	17	3.27554e-08	4.63161e-05
3899	CU682645	(sp:P67963) Casein kinase I isoform alpha OS=Xenopus laevis GN=csnk1a1 PE=2 SV=1	7	0	0.0862965	0.0413298	0.155313	0.0748188	-0.176611	0.0545115	-0.295806	0.0743482	-0.0985015	0.0622374	0.150441	0.103801	27.365	0.704135	0.0874863	5	17	1.44811e-07	0.000175945
41846	CU686507	0	7	male gonad	0.470596	0.0953908	0.925307	0.150651	0.344262	0.150748	-0.00650441	0.0429034	0.862019	0.020728	0.962761	0.109255	48.7094	2.94765	0.205751	5	17	1.75437e-09	3.13682e-06
29624	CU984201	0	7	0	1.00389	0.0777322	1.09629	0.0614325	0.877906	0.0354752	0.759203	0.0544018	1.06212	0.0702925	1.18496	0.10386	19.2061	0.476455	0.0843457	5	17	1.87097e-06	0.00155477
33698	CU986641	0	8	0	0.515669	0.102901	0.633709	0.0700164	0.380952	0.0676853	0.246417	0.13479	0.507353	0.0453922	0.753723	0.0657913	16.588	0.643164	0.131828	5	17	5.16475e-06	0.00344489
3398	CU987970	0	8	0	-0.189152	0.0878321	-0.116806	0.186602	-0.565721	0.04567	-0.837276	0.123906	-0.383348	0.0423088	-0.0623976	0.055593	31.564	1.7896	0.192772	5	17	4.97766e-08	6.73477e-05
18301	CU989074	"(sp:Q68FX0) Isocitrate dehydrogenase [NAD] subunit beta, mitochondrial OS=Rattus norvegicus GN=Idh3B PE=2 SV=1"	8	male gonad	0.826389	0.124196	1.34551	0.0622601	0.682112	0.0698242	0.644051	0.040508	1.36069	0.0578157	1.61169	0.0250644	130.252	3.29543	0.0860217	5	17	6.18505e-13	1.45472e-09
24729	CU989725	(sp:Q9CZA6) Nuclear distribution protein nudE homolog 1 OS=Mus musculus GN=Nde1 PE=1 SV=1	8	0	1.00372	0.0534124	1.10455	0.0371283	0.708152	0.0729984	0.596288	0.0610056	0.694283	0.155838	1.00832	0.0528948	30.2955	0.862618	0.0968099	5	17	6.77808e-08	8.91995e-05
42148	CU989739	0	8	0	1.55083	0.109101	1.73791	0.121953	1.29035	0.0636252	0.982711	0.0701453	1.74509	0.0127278	1.89362	0.0711629	62.8587	2.26936	0.122749	5	17	2.32223e-10	4.59336e-07
33868	CU990533	(sp:P79955) Carboxy-terminal kinesin 2 OS=Xenopus laevis PE=2 SV=1	8	0	1.74958	0.0669436	1.69528	0.0853473	1.62475	0.158264	1.10914	0.0641031	1.73139	0.0157696	1.97437	0.0691292	41.0272	1.6604	0.1376	5	17	6.69692e-09	1.09026e-05
24847	CU990607	0	8	0	1.64181	0.0477294	1.87633	0.0202837	1.53266	0.0378351	1.5403	0.02264	1.60868	0.0740023	1.78086	0.0493018	39.7968	0.37626	0.0321455	5	17	8.47593e-09	1.35869e-05
6353	CU991150	(sp:P49739) Maternal DNA replication licensing factor mcm3 OS=Xenopus laevis GN=mmcm3 PE=1 SV=2	8	0	0.995108	0.0158021	0.957536	0.0454744	1.03627	0.0703246	0.715874	0.0472112	0.82934	0.0983904	1.15014	0.0580898	27.051	0.461146	0.0579608	5	17	1.57737e-07	0.000189442
4420	CU991591	(sp:P70040) Flap endonuclease 1-A OS=Xenopus laevis GN=fen1-A PE=1 SV=1	8	0	2.05524	0.0719108	1.94688	0.136008	1.94997	0.0364564	1.67689	0.0319812	1.9746	0.0576988	2.24334	0.0517955	24.7356	0.674921	0.0927705	5	17	3.04717e-07	0.000333969
33084	CU992983	(sp:Q9CPY6) Uncharacterized protein C17orf39 homolog OS=Mus musculus PE=2 SV=1	8	0	1.0426	0.0327762	1.26549	0.0716044	1.05614	0.0657376	1.14233	0.0465384	1.43167	0.0845415	1.67386	0.105967	46.7933	1.18425	0.0860476	5	17	2.40367e-09	4.24008e-06
34003	CU992985	(sp:Q8WMV1) Delta(14)-sterol reductase OS=Bos taurus GN=TM7SF2 PE=1 SV=1	8	0	1.24123	0.120022	1.48144	0.164913	0.997233	0.151493	0.516058	0.113739	1.15219	0.452477	1.59302	0.14007	14.3323	2.95412	0.700794	5	17	1.38053e-05	0.00749628
18322	CU993629	0	8	0	1.59338	0.12589	1.6281	0.109368	1.39428	0.0195552	1.17443	0.0582795	1.50685	0.0288839	1.79375	0.0419618	30.3843	0.909001	0.101717	5	17	6.63059e-08	8.74575e-05
30510	CU993905	0	8	0	1.06207	0.0489036	1.45905	0.0657606	0.97558	0.0238678	0.923469	0.0734397	1.27196	0.120713	1.50179	0.058903	53.9561	1.2313	0.0775893	5	17	7.82822e-10	1.4537e-06
7053	CU994586	(sp:A4IHT0) Fidgetin-like protein 1 OS=Xenopus tropicalis GN=fignl1 PE=2 SV=1	8	0	0.75447	0.0472561	0.627242	0.0501626	0.261367	0.0819093	0.103226	0.0822312	0.220041	0.033448	0.488485	0.0569473	64.2905	1.25987	0.0666281	5	17	1.9393e-10	3.86891e-07
14302	CU994593	0	8	0	1.85957	0.0198776	1.99538	0.0694208	1.74058	0.0684982	1.73069	0.044997	1.82581	0.0949685	2.1116	0.0328204	26.526	0.445191	0.0570629	5	17	1.8233e-07	0.00021442
22016	CU995094	0	8	male gonad	1.2129	0.0946449	1.718	0.100524	1.16631	0.0401933	1.19991	0.047099	1.5379	0.155183	1.81209	0.0574085	43.6733	1.62799	0.12674	5	17	4.12087e-09	6.97251e-06
38834	CU995830	0	8	0	1.2956	0.0750231	1.46851	0.0902816	1.17749	0.124185	0.99834	0.0695894	1.40072	0.0463572	1.54106	0.0419374	24.2994	0.798347	0.111706	5	17	3.47002e-07	0.000375803
3887	CU995924	(sp:P26446) Poly [ADP-ribose] polymerase 1 OS=Gallus gallus GN=PARP1 PE=1 SV=2	8	0	1.67394	0.0403894	1.98489	0.0909648	1.65315	0.0460882	1.64215	0.0558831	1.79407	0.100623	2.13341	0.0633341	36.1324	0.826182	0.0777424	5	17	1.7817e-08	2.67968e-05
36681	AM855782	0	8	0	1.09209	0.052725	1.41283	0.116524	1.12301	0.079988	1.16618	0.0737941	1.30265	0.0975291	1.59529	0.0836713	20.77	0.761348	0.124631	5	17	1.07556e-06	0.000970158
15341	CU999128	0	8	0	2.28822	0.0222332	2.45718	0.0415731	2.25238	0.0625002	2.21894	0.0397578	2.44946	0.00700454	2.50767	0.0343319	37.5401	0.295495	0.0267629	5	17	1.32902e-08	2.056e-05
24064	CX069167	0	8	0	2.08442	0.0457922	2.38284	0.0683022	1.99604	0.058543	1.94422	0.0372865	2.23589	0.0212121	2.49482	0.0245567	87.4604	0.963302	0.0374481	5	17	1.61703e-11	3.49925e-08
42759	DV736677	0	8	0	1.31926	0.0295933	1.44318	0.0929063	1.20631	0.0448144	1.09966	0.0758318	1.2783	0.0412693	1.5495	0.0993245	20.9438	0.522367	0.0848008	5	17	1.01359e-06	0.000923382
43719	DV736829	"(sp:P0CB68) NADH-ubiquinone oxidoreductase 75 kDa subunit, mitochondrial OS=Pongo pygmaeus GN=NDUFS1 PE=2 SV=1"	8	0	1.95043	0.0698351	2.07607	0.0642941	1.84918	0.0725655	1.79646	0.0299056	2.06361	0.109398	2.2466	0.0462195	24.3959	0.544292	0.0758567	5	17	3.3711e-07	0.000366438
10608	EE677550	0	8	0	2.2455	0.0712149	2.45552	0.0420654	2.11483	0.060131	2.10329	0.0677884	2.32074	0.0454985	2.48898	0.042526	33.5912	0.540639	0.0547218	5	17	3.10711e-08	4.42141e-05
29545	EE677794	(sp:O96647) 60S ribosomal protein L10 OS=Bombyx mandarina GN=RpL10 PE=2 SV=1	8	0	2.36688	0.0247095	2.4553	0.0427418	2.36298	0.030846	2.25891	0.0277322	2.48092	0.0280911	2.50542	0.0366961	31.1497	0.165752	0.0180919	5	17	5.499e-08	7.38516e-05
42738	EW778614	"(sp:Q39610) Dynein alpha chain, flagellar outer arm OS=Chlamydomonas reinhardtii GN=ODA11 PE=3 SV=2"	8	0	0.851863	0.104103	1.07715	0.137058	0.427482	0.125319	0.146227	0.0589572	0.650127	0.195439	1.20973	0.10934	42.1981	3.2104	0.258669	5	17	5.3835e-09	8.92045e-06
21295	EW779453	0	8	0	1.55372	0.0576617	1.66386	0.065151	1.3324	0.0457797	1.18376	0.0648294	1.33813	0.0538444	1.54514	0.0665854	35.6481	0.636462	0.0607038	5	17	1.97544e-08	2.93551e-05
25961	EW779455	hypothetical protein AaeL_AAEL013540 [Aedes aegypti]	8	0	1.142	0.0744812	1.3425	0.0508158	0.987231	0.0610162	0.89658	0.069381	1.22553	0.0910756	1.52827	0.108349	35.8033	1.07207	0.101807	5	17	1.91089e-08	2.84341e-05
42921	EX956406	0	8	male gonad	0.914191	0.0488284	1.25492	0.0684092	0.61073	0.129906	0.505324	0.064894	1.19852	0.108901	1.5215	0.107649	73.2407	3.07903	0.142936	5	17	6.80454e-11	1.40718e-07
3296	FP000328	"(sp:Q16595) Frataxin, mitochondrial OS=Homo sapiens GN=FXN PE=1 SV=2"	8	0	1.10317	0.0483061	1.35455	0.0744578	0.775655	0.0613489	0.887752	0.0678252	1.05417	0.0715465	1.43213	0.0741968	58.8994	1.30752	0.0754775	5	17	3.90267e-10	7.50873e-07
5407	FP000995	(sp:Q64511) DNA topoisomerase 2-beta OS=Mus musculus GN=Top2b PE=1 SV=2	8	0	0.662311	0.0889841	1.08516	0.0280285	0.289865	0.0843765	0.133534	0.0663856	0.841639	0.0628348	1.08281	0.0489287	143.062	3.18815	0.0757691	5	17	2.84883e-13	6.78877e-10
5462	FP001117	(sp:Q9ULG1) Putative DNA helicase INO80 complex homolog 1 OS=Homo sapiens GN=INO80 PE=1 SV=2	8	0	1.67463	0.0566475	1.98333	0.049523	1.70999	0.046308	1.71397	0.0526487	1.87477	0.0597653	2.026	0.0400012	35.9399	0.461695	0.0436774	5	17	1.85602e-08	2.78031e-05
20472	FP001301	(sp:P47224) Guanine nucleotide exchange factor MSS4 OS=Homo sapiens GN=RABIF PE=1 SV=2	8	male gonad	1.15934	0.0742133	1.63128	0.131517	1.28907	0.112915	1.20278	0.153422	1.68271	0.101416	1.95561	0.0961128	29.907	1.98407	0.225561	5	17	7.4672e-08	9.66256e-05
2088	FP001673	"(sp:Q6B860) 28S ribosomal protein S14, mitochondrial OS=Bos taurus GN=MRPS14 PE=1 SV=1"	8	0	1.56546	0.123234	1.73282	0.0622528	1.44428	0.022639	1.40002	0.0203947	1.51371	0.133499	1.94719	0.071877	25.592	0.836368	0.111115	5	17	2.37426e-07	0.000269004
706	FP002102	"(sp:Q3ZC04) Ribosomal protein 63, mitochondrial OS=Bos taurus GN=MRP63 PE=1 SV=1"	8	0	1.16409	0.0665638	1.1746	0.156363	0.897098	0.0467313	0.749838	0.0333444	0.919321	0.121631	1.36872	0.0807875	23.9342	1.02562	0.145695	5	17	3.87477e-07	0.000412663
37963	FP002740	0	8	0	1.56738	0.141439	1.83591	0.070925	1.57357	0.0613143	1.51684	0.0484241	1.60665	0.0858368	2.07791	0.0775945	25.3153	0.939781	0.126218	5	17	2.57152e-07	0.000288525
34731	FP003786	0	8	0	1.81651	0.0653783	2.01716	0.0302578	1.63913	0.0768837	1.66511	0.00270629	1.86399	0.0425546	2.07282	0.0898974	34.9749	0.629458	0.0611913	5	17	2.28504e-08	3.36814e-05
31265	AM856742	(sp:Q497V5) S1 RNA-binding domain-containing protein 1 OS=Mus musculus GN=Srbd1 PE=1 SV=2	8	0	0.487206	0.0408045	0.471953	0.0450861	0.345358	0.0883509	0.189894	0.0821712	0.29185	0.0524413	0.542523	0.0391906	18.5857	0.354633	0.0648752	5	17	2.3546e-06	0.00186249
30852	FP003920	0	8	0	0.993037	0.0909285	1.34147	0.0776531	0.753266	0.112349	0.563159	0.0902002	1.12404	0.0976144	1.17858	0.172626	26.1492	1.64298	0.213625	5	17	2.02626e-07	0.000234235
33501	FP004210	(sp:P26446) Poly [ADP-ribose] polymerase 1 OS=Gallus gallus GN=PARP1 PE=1 SV=2	8	0	1.71991	0.0356568	2.09331	0.0770099	1.84662	0.0380121	1.77595	0.0995392	1.97083	0.102705	2.26873	0.076713	31.1449	0.864874	0.0944158	5	17	5.50535e-08	7.38819e-05
6648	FP004902	(sp:Q3YK19) Fanconi anemia group J protein homolog OS=Gallus gallus GN=BRIP1 PE=2 SV=1	8	0	1.20713	0.0824161	1.38201	0.0693364	0.927742	0.0542046	0.684442	0.0795396	0.891361	0.0475066	1.21788	0.0691357	55.1236	1.32048	0.0814469	5	17	6.60694e-10	1.23484e-06
16160	FP005816	(sp:Q9CY94) DNA replication complex GINS protein PSF3 OS=Mus musculus GN=Gins3 PE=2 SV=1	8	0	1.48975	0.0593851	1.48882	0.130814	1.35055	0.111304	1.10095	0.0712429	1.35446	0.0712629	1.67378	0.0715239	17.8481	0.733935	0.139812	5	17	3.12077e-06	0.00234058
35170	FP006486	0	8	0	1.38552	0.0742403	1.6398	0.153719	1.30316	0.0706371	1.28739	0.0430297	1.45237	0.019828	1.79648	0.0185818	25.2199	0.814226	0.109769	5	17	2.64376e-07	0.000295572
7060	AM856997	0	8	0	0.922062	0.0862001	1.11356	0.0965831	0.77772	0.0584489	0.8427	0.051316	0.955891	0.0595773	1.17768	0.0171147	21.2252	0.476959	0.0764027	5	17	9.21506e-07	0.000859765
15281	FP006839	(sp:P56399) Ubiquitin carboxyl-terminal hydrolase 5 OS=Mus musculus GN=Usp5 PE=1 SV=1	8	0	1.89695	0.0780836	1.94335	0.0253201	1.77447	0.0596294	1.65044	0.0404239	1.89155	0.0581184	2.18924	0.0918123	32.7172	0.652685	0.0678277	5	17	3.79502e-08	5.28646e-05
8763	FP007125	(sp:Q9CWW7) CpG-binding protein OS=Mus musculus GN=Cxxc1 PE=2 SV=1	8	0	1.08527	0.110971	1.34901	0.0894839	0.818904	0.109502	0.875543	0.038362	1.04128	0.0181762	1.37677	0.0809262	30.2433	1.08218	0.12166	5	17	6.86626e-08	8.9948e-05
11239	FP007261	0	8	male gonad	1.12808	0.0905298	1.68677	0.0764184	0.819165	0.0584278	0.710403	0.101222	1.37395	0.127099	1.71672	0.0527638	100.03	3.64066	0.123746	5	17	5.40945e-12	1.21172e-08
26708	FP007638	0	8	0	2.11801	0.0536126	2.33724	0.0670461	2.0094	0.0546781	1.95173	0.0404571	2.23195	0.0646664	2.45626	0.0281726	54.74	0.752393	0.0467324	5	17	6.98295e-10	1.30372e-06
35345	FP007855	0	8	0	2.12638	0.0299699	2.35447	0.0664196	2.07084	0.0553176	2.04739	0.027315	2.25853	0.0794335	2.48529	0.0253592	48.8056	0.601406	0.0418964	5	17	1.72735e-09	3.09024e-06
41416	FP007869	0	8	0	2.04714	0.0576433	2.17299	0.0615588	2.02341	0.0344852	1.93952	0.0435715	2.18116	0.0275382	2.45107	0.0603476	50.9725	0.645283	0.043042	5	17	1.22703e-09	2.22584e-06
21534	FP008314	0	8	0	1.56181	0.0498865	1.60722	0.0431929	1.57084	0.0232061	1.34961	0.0453289	1.60395	0.0251903	1.86933	0.0466658	65.2124	0.54941	0.0286448	5	17	1.73031e-10	3.46927e-07
1495	AM857155	hypothetical protein LOC100158539 [Xenopus (Silurana) tropicalis]	8	0	1.04208	0.104758	1.31828	0.0320517	0.893724	0.132223	0.808273	0.0833981	0.998303	0.100529	1.2848	0.141881	15.1405	0.845737	0.189922	5	17	9.58017e-06	0.00563314
11158	FP009012	0	8	0	1.78487	0.0845937	1.84505	0.0867799	1.65779	0.135802	1.45317	0.0319617	1.69816	0.0717407	1.92162	0.0499259	15.3339	0.5422	0.120223	5	17	8.79799e-06	0.0052612
27119	FP009629	0	8	0	0.854512	0.0558596	1.05755	0.0311945	0.652475	0.0698536	0.459061	0.114974	0.755403	0.0868972	1.08783	0.0668196	41.568	1.16235	0.095073	5	17	6.05043e-09	9.9106e-06
30799	FP010382	0	8	0	2.09323	0.0401884	2.32004	0.0613252	2.1004	0.048224	1.9538	0.0186916	2.25863	0.0265971	2.44543	0.0866061	44.9386	0.63534	0.0480691	5	17	3.298e-09	5.69894e-06
43394	FP011330	0	8	0	1.52855	0.103193	1.52522	0.0988863	1.37721	0.156544	0.922809	0.084665	1.25061	0.0985694	1.46142	0.163447	14.1176	1.06248	0.255881	5	17	1.52532e-05	0.00808422
8655	FP011384	"(sp:Q9CQX8) 28S ribosomal protein S36, mitochondrial OS=Mus musculus GN=Mrps36 PE=1 SV=1"	8	0	1.5121	0.0522226	1.61797	0.077386	1.3059	0.0910512	1.10555	0.0378257	1.39737	0.110869	1.78987	0.0728671	40.9837	1.15506	0.0958235	5	17	6.7521e-09	1.09789e-05
24188	FP011478	0	8	0	1.63526	0.130205	1.45328	0.128079	1.4338	0.0904879	1.02694	0.089541	1.20522	0.116458	1.42254	0.124036	13.6129	0.888719	0.221969	5	17	1.93739e-05	0.00968694
30864	FP011673	0	8	0	2.3408	0.0175652	2.45289	0.0484092	2.21748	0.0266611	2.13228	0.0478536	2.39146	0.0267011	2.5056	0.0374828	60.3531	0.401154	0.0225991	5	17	3.21348e-10	6.27271e-07
13209	FP011728	(sp:O67124) Probable DNA double-strand break repair rad50 ATPase OS=Aquifex aeolicus GN=rad50 PE=3 SV=1	8	0	0.244021	0.0726677	0.650299	0.0853694	-0.0376939	0.0536876	-0.325259	0.0321239	0.413742	0.0567455	0.599236	0.077105	132.089	2.86415	0.0737241	5	17	5.51004e-13	1.29706e-09
42886	AF075688	(sp:Q9GMB0) Dolichyl-diphosphooligosaccharide--protein glycosyltransferase subunit 1 OS=Sus scrofa GN=RPN1 PE=1 SV=1	8	0	1.97241	0.0547119	2.16313	0.0735153	1.93965	0.0604579	1.94931	0.0316744	2.15176	0.0358462	2.36993	0.0773266	32.5388	0.571123	0.0596771	5	17	3.95544e-08	5.48224e-05
21598	AM857985	0	8	0	1.88473	0.052975	2.0111	0.152337	1.8317	0.0256078	1.79271	0.0276789	1.95961	0.0430175	2.20282	0.0182643	17.2952	0.442586	0.0870063	5	17	3.87854e-06	0.00279255
36122	AJ563465	(sp:Q6GP53) N-acetyltransferase NAT13 OS=Xenopus laevis GN=nat13 PE=2 SV=1	8	0	1.57022	0.0764949	1.67331	0.152471	1.63371	0.0611784	1.47047	0.0578242	1.67991	0.0737688	1.95982	0.0485271	14.5082	0.539808	0.126505	5	17	1.27334e-05	0.00707979
28243	BQ427003	0	8	0	2.17168	0.0525052	2.31232	0.066106	2.16385	0.0242592	2.07479	0.0451881	2.31103	0.0193864	2.50309	0.0366351	45.8944	0.459617	0.0340499	5	17	2.79782e-09	4.89059e-06
6680	CD526833	(sp:Q8STF0) Calmodulin OS=Strongylocentrotus intermedius PE=2 SV=3	8	0	1.63048	0.0824244	2.03371	0.123583	1.67813	0.0500821	1.67507	0.0409509	2.07866	0.131301	2.37513	0.065989	47.3692	1.75961	0.126299	5	17	2.18393e-09	3.87429e-06
29779	AM863796	"PREDICTED: Apis mellifera hypothetical LOC552741 (LOC552741), mRNA"	8	0	2.17504	0.0757674	2.20422	0.0812834	2.1948	0.0317598	1.99251	0.0598046	2.17497	0.0421317	2.44602	0.0605888	21.787	0.418837	0.0653621	5	17	7.64295e-07	0.000739837
31759	AM857960	(sp:Q5E9K0) Proteasome subunit beta type-2 OS=Bos taurus GN=PSMB2 PE=1 SV=1	8	0	1.60676	0.0805052	1.63793	0.100025	1.53794	0.0341923	1.45291	0.0355744	1.66706	0.0586629	1.91001	0.0575035	22.1443	0.479128	0.0735646	5	17	6.80008e-07	0.000667768
37992	AM862039	0	8	0	0.832777	0.112075	1.08753	0.0880833	0.832545	0.0375421	0.736912	0.0456789	0.961	0.083597	1.31993	0.0363288	34.6901	0.911965	0.0893823	5	17	2.43205e-08	3.56538e-05
29500	CB617339	0	8	0	2.42139	0.035936	2.45717	0.041572	2.28083	0.0702901	2.23677	0.0519177	2.39552	0.0407129	2.50157	0.0394594	18.0275	0.211842	0.0399535	5	17	2.91154e-06	0.00221568
4993	CU999152	0	8	0	1.7153	0.031792	1.93879	0.14202	1.56539	0.0623243	1.67878	0.10141	1.76255	0.109021	2.07189	0.114671	13.7043	0.682254	0.169266	5	17	1.85439e-05	0.00936467
10590	CX069137	(sp:P40618) High mobility group protein B3 OS=Gallus gallus GN=HMGB3 PE=2 SV=2	8	0	2.49369	0.0629884	2.45615	0.0416984	2.46179	0.0293606	2.00273	0.171146	2.35428	0.091241	2.50687	0.0331503	19.6585	0.737338	0.127525	5	17	1.58814e-06	0.00135786
18281	AM855277	(sp:Q6NVR1) Alpha-endosulfine OS=Xenopus tropicalis GN=ensa PE=2 SV=1	8	0	1.66596	0.0540035	1.70308	0.093949	1.59473	0.0515708	1.55214	0.0513403	1.66551	0.0754628	1.9331	0.066006	15.8928	0.35326	0.0755741	5	17	6.91047e-06	0.00431904
41445	AM861695	"(sp:Q06450) ATP synthase subunit epsilon, mitochondrial OS=Ipomoea batatas PE=1 SV=2"	8	0	2.14405	0.0261758	2.38272	0.0613726	2.17385	0.0432708	2.13521	0.0045095	2.286	0.0250559	2.50346	0.0380889	61.0846	0.442707	0.0246413	5	17	2.91897e-10	5.72118e-07
27172	ES789105	"(sp:Q9DCT2) NADH dehydrogenase [ubiquinone] iron-sulfur protein 3, mitochondrial OS=Mus musculus GN=Ndufs3 PE=1 SV=2"	8	0	1.76942	0.120836	1.92682	0.0988068	1.57665	0.0665319	1.58067	0.0626133	1.77504	0.0325677	2.11893	0.0532083	27.1153	0.867275	0.108748	5	17	1.54988e-07	0.000186451
2058	BQ426961	0	8	0	2.13731	0.0649116	2.31611	0.0567984	1.97305	0.0584896	1.80391	0.0512208	2.32909	0.0488323	2.47123	0.0242588	88.2229	1.21922	0.0469872	5	17	1.50679e-11	3.26974e-08
5534	AM857588	(sp:Q803H4) Histone H3-like centromeric protein A OS=Danio rerio GN=cenpa PE=1 SV=1	8	0	1.73914	0.0603762	1.88602	0.0973137	1.40789	0.253183	1.00741	0.054498	1.74922	0.0508457	2.12155	0.0219909	42.0851	3.05962	0.247182	5	17	5.49679e-09	9.10268e-06
40963	BQ426947	(sp:O42149) Protein mago nashi homolog OS=Xenopus laevis GN=magoh PE=2 SV=1	8	0	2.19823	0.0136848	2.21423	0.125416	2.16034	0.0389556	1.98889	0.0209311	2.05931	0.0283764	2.39139	0.0621653	19.0866	0.375112	0.0668207	5	17	1.95473e-06	0.00160874
35465	AM864634	(sp:Q1HPL8) NADH dehydrogenase [ubiquinone] 1 beta subcomplex subunit 10 OS=Bombyx mori PE=1 SV=1	8	0	1.97464	0.140497	2.12151	0.0625824	1.85958	0.0496391	1.67921	0.0386646	1.95945	0.0989408	2.23772	0.0552043	23.3381	0.765804	0.111566	5	17	4.65402e-07	0.000481691
14054	AM855741	(sp:O54879) High mobility group protein B3 OS=Mus musculus GN=Hmgb3 PE=2 SV=3	8	0	1.58541	0.0712169	1.95433	0.121453	1.46596	0.0577453	1.06306	0.065986	1.45938	0.166887	1.88066	0.034124	50.0318	2.08559	0.14173	5	17	1.42105e-09	2.56641e-06
34732	DV736629	0	8	0	2.22232	0.0689019	2.43391	0.0487531	2.24253	0.0590889	2.19743	0.0379781	2.37974	0.033749	2.50203	0.0417605	24.6047	0.316129	0.0436843	5	17	3.16762e-07	0.000345588
19408	AM869418	(sp:Q9V439) Mediator of RNA polymerase II transcription subunit 22 OS=Drosophila melanogaster GN=MED22 PE=1 SV=1	8	0	2.11096	0.101739	2.25274	0.076463	2.02475	0.0403542	1.90464	0.048006	2.11074	0.0160899	2.38045	0.0604261	26.5481	0.561128	0.0718632	5	17	1.8121e-07	0.000213466
28770	AM864330	(sp:O73817) Proteasome subunit beta type-3 OS=Oncorhynchus mykiss GN=psmb3 PE=2 SV=1	8	0	2.13461	0.0930001	2.3132	0.114052	2.05422	0.0598238	1.93008	0.0544102	1.99588	0.0554997	2.34253	0.115187	14.361	0.551431	0.130553	5	17	1.3624e-05	0.00742509
13947	AM866816	(sp:Q90987) Stathmin-2 OS=Gallus gallus GN=STMN2 PE=2 SV=1	8	0	2.16978	0.0801189	2.45561	0.0410656	2.09662	0.0690369	1.92059	0.0704038	2.49169	0.0429524	2.50822	0.0346633	64.9053	1.16026	0.0607791	5	17	1.79699e-10	3.59757e-07
12653	AM858021	0	8	0	2.13471	0.0360745	2.32141	0.0832336	2.09477	0.0413516	2.05337	0.0357419	2.29578	0.0265863	2.5009	0.035791	50.1791	0.574204	0.0389065	5	17	1.38852e-09	2.51045e-06
42481	AM856859	0	8	0	1.93873	0.0434118	2.17994	0.100961	1.89556	0.02444	1.66785	0.0205535	1.97052	0.128954	2.34454	0.10347	35.9548	1.10687	0.104669	5	17	1.85015e-08	2.77337e-05
15399	AM861427	(sp:P20664) DNA primase small subunit OS=Mus musculus GN=Prim1 PE=1 SV=1	8	0	1.4234	0.0366418	1.36202	0.124186	1.28004	0.0554371	0.938313	0.0445871	0.87964	0.106566	1.35041	0.136513	23.4424	0.993532	0.144098	5	17	4.50589e-07	0.000469514
2830	AM863722	(sp:Q3MHN0) Proteasome subunit beta type-6 OS=Bos taurus GN=PSMB6 PE=1 SV=1	8	0	2.15239	0.0646932	2.20789	0.0940894	2.0229	0.041283	1.86356	0.0487666	2.05528	0.0642276	2.37236	0.0462259	31.0303	0.602558	0.0660224	5	17	5.66029e-08	7.56215e-05
33471	AM862921	(sp:Q9BSJ2) Gamma-tubulin complex component 2 OS=Homo sapiens GN=TUBGCP2 PE=1 SV=2	8	male gonad	-0.210878	0.111204	0.0961305	0.075384	-0.547196	0.0629161	-0.664021	0.105325	-0.287837	0.108175	0.0731498	0.0681115	48.4183	1.94562	0.136624	5	17	1.83895e-09	3.28436e-06
36754	AM859202	hypothetical protein Phum_PHUM308510 [Pediculus humanus corporis]	8	0	1.91151	0.14358	1.71146	0.0451086	1.86149	0.112059	1.30716	0.0691257	1.72992	0.0976345	1.98241	0.0665907	25.9285	1.16163	0.152324	5	17	2.15681e-07	0.000248465
8317	CU685928	0	8	0	2.00157	0.0474242	2.33029	0.0688473	1.96104	0.0572159	1.89757	0.0325763	2.22113	0.0461703	2.47964	0.031821	87.7492	1.06519	0.0412728	5	17	1.57426e-11	3.41143e-08
2795	EE677642	0	8	0	1.70719	0.0548407	1.86843	0.0715121	1.53409	0.0891859	1.44662	0.0528767	1.7127	0.116922	2.03131	0.0419156	34.8114	0.913564	0.0892269	5	17	2.36816e-08	3.4812e-05
41297	AM859124	(sp:Q9CQJ8) NADH dehydrogenase [ubiquinone] 1 beta subcomplex subunit 9 OS=Mus musculus GN=Ndufb9 PE=1 SV=3	8	0	2.31417	0.0284611	2.4094	0.0807278	2.27068	0.0400675	2.21809	0.0245164	2.40472	0.0278401	2.50277	0.0411124	20.8836	0.216337	0.0352213	5	17	1.03459e-06	0.000937338
28701	AM859382	(sp:O14248) Tip elongation aberrant protein 3 OS=Schizosaccharomyces pombe GN=tea3 PE=1 SV=1	8	0	1.31859	0.0863708	1.65896	0.104701	1.21136	0.0621959	1.00143	0.039241	1.2843	0.18387	1.7139	0.0497243	34.4265	1.48363	0.146525	5	17	2.57757e-08	3.75036e-05
38418	AM861410	(sp:P25386) Intracellular protein transport protein USO1 OS=Saccharomyces cerevisiae GN=USO1 PE=1 SV=2	8	male gonad	-0.0100054	0.172072	1.30652	0.0442468	0.393108	0.111201	0.542861	0.103279	1.44805	0.0611736	1.62455	0.0602077	158.189	8.47498	0.182156	5	17	1.23901e-13	2.98229e-10
24676	AM856873	(sp:Q8R010) Aminoacyl tRNA synthetase complex-interacting multifunctional protein 2 OS=Mus musculus GN=Aimp2 PE=1 SV=1	8	0	2.01197	0.0439824	2.06738	0.0439777	1.83092	0.0616667	1.76916	0.0182182	1.80574	0.0293569	2.03997	0.0552977	33.0599	0.339415	0.0349066	5	17	3.50682e-08	4.93059e-05
20357	AM857848	0	8	0	1.38256	0.0949122	1.94577	0.0788202	1.30073	0.0577994	1.14274	0.117144	1.32131	0.0738861	1.64024	0.0645995	46.9077	1.65958	0.120291	5	17	2.35811e-09	4.16206e-06
21174	AM866200	(sp:Q9NQP4) Prefoldin subunit 4 OS=Homo sapiens GN=PFDN4 PE=1 SV=1	8	0	1.91097	0.0822248	1.99262	0.109149	1.79669	0.0787621	1.65311	0.0123021	1.92304	0.0935021	2.19745	0.0683939	21.4824	0.673573	0.106606	5	17	8.45451e-07	0.000804869
18695	AM857904	0	8	0	1.66786	0.0371508	1.92901	0.0708172	1.39582	0.0285291	1.21731	0.0290415	1.90371	0.0553804	2.10226	0.0496275	206.35	2.28686	0.0376804	5	17	1.35447e-14	3.32117e-11
36885	AM859087	(sp:Q5R7X9) Cell cycle checkpoint protein RAD1 OS=Pongo abelii GN=RAD1 PE=2 SV=1	8	0	1.21964	0.125477	1.20891	0.136999	0.983755	0.0818513	0.621948	0.0985236	0.800056	0.115714	1.28453	0.108455	21.5911	1.36422	0.214826	5	17	8.15425e-07	0.000781177
33174	AM857511	0	8	0	1.23358	0.0779693	1.26927	0.0326311	1.04893	0.0686059	1.05107	0.0484513	1.14458	0.0434237	1.39582	0.054371	22.4694	0.365026	0.0552348	5	17	6.12267e-07	0.000611043
30235	AM853968	0	8	0	0.220971	0.0908483	0.434721	0.0887269	-0.0116822	0.0968235	-0.0907917	0.133776	0.0607185	0.144151	0.509637	0.0599571	21.9814	1.18011	0.182534	5	17	7.17069e-07	0.000699143
11783	AM861721	0	8	0	0.881495	0.0784801	0.836839	0.0898719	0.678353	0.0803608	0.318315	0.0736821	0.565284	0.122518	0.864884	0.144406	18.977	0.954152	0.17095	5	17	2.03527e-06	0.00165468
21186	AM856942	(sp:Q7T0M6) Histone chaperone asf1-B OS=Xenopus laevis GN=asf1-B PE=2 SV=1	8	0	1.37164	0.173652	1.7411	0.175699	1.10161	0.111605	1.01065	0.107272	1.3859	0.175151	1.73909	0.0842379	19.0358	1.89019	0.337609	5	17	1.99162e-06	0.00162716
7891	AM864536	(sp:Q3ZBK3) Kinetochore protein Spc25 OS=Bos taurus GN=SPC25 PE=2 SV=1	8	male gonad	1.3449	0.069131	1.83515	0.0906833	1.19087	0.0660386	1.12592	0.0727423	1.80312	0.0621307	1.99245	0.107245	83.3259	2.7005	0.11019	5	17	2.39642e-11	5.12833e-08
35227	CU999748	0	8	0	2.03139	0.0559536	2.34095	0.0401443	2.05298	0.0308186	2.01129	0.0418575	2.2713	0.121	2.5017	0.041057	48.0795	0.801394	0.0566716	5	17	1.94322e-09	3.46476e-06
16199	AM862598	(sp:Q9NYB0) Telomeric repeat-binding factor 2-interacting protein 1 OS=Homo sapiens GN=TERF2IP PE=1 SV=1	8	0	1.28341	0.0632281	1.32791	0.205426	1.13239	0.0217503	0.678981	0.0644468	0.947388	0.0409986	1.36496	0.0504654	28.8136	1.38538	0.163474	5	17	9.86624e-08	0.000124019
4509	AM865265	(sp:Q9DG67) DNA repair and recombination protein RAD54B OS=Gallus gallus GN=RAD54B PE=2 SV=1	8	0	0.441652	0.177156	0.624355	0.088225	0.0791144	0.0882787	-0.230834	0.0657321	0.0850218	0.154777	0.536425	0.0845146	32.826	2.15479	0.223186	5	17	3.70072e-08	5.17361e-05
11356	AM858065	(sp:Q9QWT9) Kinesin-like protein KIFC1 OS=Mus musculus GN=Kifc1 PE=1 SV=2	8	0	1.00074	0.0866993	1.03052	0.138975	0.879833	0.196103	0.297168	0.120624	1.04489	0.0987271	1.27604	0.0633425	27.4286	2.18658	0.271044	5	17	1.42336e-07	0.000173507
20877	EE677773	"(sp:Q94519) Acyl carrier protein, mitochondrial OS=Drosophila melanogaster GN=mtacp1 PE=1 SV=1"	8	0	2.33034	0.0230774	2.42149	0.0848322	2.18742	0.0585211	2.07742	0.0489302	2.2667	0.112733	2.50334	0.0378646	23.208	0.480285	0.0703624	5	17	4.84641e-07	0.000497726
36423	BQ427163	(sp:Q5BJ65) Histone H2A.V OS=Xenopus tropicalis GN=h2afv PE=2 SV=3	8	0	2.44627	0.0560183	2.4569	0.0420496	2.48096	0.0239755	2.27293	0.039043	2.48895	0.0385646	2.50755	0.0353604	17.7842	0.145107	0.0277417	5	17	3.19928e-06	0.00239306
42486	AM860387	"(sp:Q27237) Protein tumorous imaginal discs, mitochondrial OS=Drosophila melanogaster GN=l(2)tid PE=1 SV=2"	8	0	1.42524	0.0640243	1.6291	0.0434797	1.39973	0.0870036	1.42805	0.0266986	1.53472	0.0652083	1.90219	0.0837967	34.4571	0.733591	0.072386	5	17	2.56023e-08	3.73281e-05
19772	AM860399	(sp:O60869) Endothelial differentiation-related factor 1 OS=Homo sapiens GN=EDF1 PE=1 SV=1	8	0	2.20046	0.0189376	2.35352	0.089218	2.26494	0.0470614	2.20325	0.0235401	2.41647	0.0287591	2.50419	0.034069	25.8477	0.291914	0.0383984	5	17	2.20692e-07	0.000252693
43484	AM859534	(sp:P46470) 26S protease regulatory subunit 8 OS=Xenopus laevis GN=psmc5 PE=2 SV=2	8	0	1.90069	0.0570807	2.06532	0.028297	1.85959	0.0569521	1.75449	0.0167939	2.05548	0.111321	2.28831	0.0401213	46.2631	0.712555	0.0523675	5	17	2.62799e-09	4.61475e-06
33910	BQ426350	0	8	0	1.73094	0.0503718	2.09486	0.136384	1.77539	0.0901516	1.75809	0.0295444	2.11882	0.0559899	2.37623	0.0621457	42.3505	1.34861	0.10827	5	17	5.23488e-09	8.67943e-06
41191	BQ426475	(sp:Q9CZ15) DNA replication complex GINS protein PSF1 OS=Mus musculus GN=Gins1 PE=2 SV=1	8	0	1.67496	0.108184	1.80552	0.0557501	1.63617	0.0509374	1.19074	0.0294449	1.46875	0.202144	1.94959	0.029911	33.9364	1.38969	0.139229	5	17	2.87479e-08	4.12819e-05
8250	AM861485	"(sp:Q5ZKG1) 39S ribosomal protein L51, mitochondrial OS=Gallus gallus GN=MRPL51 PE=2 SV=1"	8	0	1.79598	0.0960539	1.84988	0.0689503	1.59608	0.065317	1.47457	0.0412771	1.6271	0.0820466	1.98742	0.0465929	29.9882	0.704084	0.0798278	5	17	7.31699e-08	9.49014e-05
9833	BQ426386	(sp:Q9PTW9) Proteasome subunit alpha type-7 OS=Carassius auratus GN=psma7 PE=2 SV=1	8	0	2.37075	0.0727432	2.43757	0.0741016	2.2489	0.0625968	2.10599	0.0389261	2.32639	0.0705472	2.46725	0.016592	20.3104	0.355004	0.0594284	5	17	1.26094e-06	0.00111088
37637	AM858134	"(sp:Q19724) Probable NADH dehydrogenase [ubiquinone] iron-sulfur protein 6, mitochondrial OS=Caenorhabditis elegans GN=F22D6.4 PE=2 SV=1"	8	0	1.91111	0.0523452	2.14967	0.067561	1.95564	0.100123	1.93916	0.0385591	2.15366	0.0504885	2.44741	0.0371155	42.8926	0.828569	0.0656788	5	17	4.74201e-09	7.95235e-06
20234	AM858773	(sp:Q95KV7) NADH dehydrogenase [ubiquinone] 1 alpha subcomplex subunit 13 OS=Bos taurus GN=NDUFA13 PE=1 SV=3	8	0	2.25876	0.100094	2.4344	0.0329589	2.10652	0.107873	2.02631	0.0814675	2.29177	0.10447	2.50366	0.0390868	19.9718	0.672857	0.114547	5	17	1.42038e-06	0.00123573
39892	AM860893	(sp:P61025) Cyclin-dependent kinases regulatory subunit 1 OS=Mus musculus GN=Cks1b PE=2 SV=1	8	male gonad	0.415861	0.0906992	0.841154	0.0616832	0.517946	0.0909334	0.615776	0.0610375	0.992086	0.112914	1.32715	0.0488668	73.3624	2.25999	0.10474	5	17	6.71404e-11	1.38981e-07
32125	AM858063	0	8	0	1.53476	0.0431179	1.68084	0.13405	1.44085	0.0405019	1.24117	0.0770062	1.58449	0.105876	1.93103	0.0734137	30.2681	1.07528	0.120785	5	17	6.82413e-08	8.96009e-05
42854	AM863516	0	8	0	1.47715	0.0786689	1.44712	0.0900237	1.20077	0.0733103	0.875439	0.0779664	1.24224	0.0795111	1.63003	0.0465665	49.8387	1.4129	0.096388	5	17	1.46497e-09	2.6428e-06
4998	DV736897	(sp:Q9N2W7) Probable NADH dehydrogenase [ubiquinone] 1 alpha subcomplex subunit 12 OS=Caenorhabditis elegans GN=Y94H6A.8 PE=2 SV=2	8	0	0.871455	0.0477677	1.1985	0.0865277	0.751932	0.036698	0.724998	0.00980054	1.03135	0.0991229	1.37805	0.0888818	59.4073	1.34515	0.0769854	5	17	3.64467e-10	7.06701e-07
35333	AM858776	"(sp:P07735) Glycerol-3-phosphate dehydrogenase [NAD+], cytoplasmic OS=Drosophila virilis GN=Gpdh PE=1 SV=3"	8	male gonad	0.21222	0.0901177	0.775659	0.104517	0.20651	0.0762424	0.0229252	0.0833482	0.323666	0.0660314	0.585114	0.151319	30.1662	1.5334	0.172828	5	17	6.99921e-08	9.14797e-05
44390	BQ426799	(sp:P28075) Proteasome subunit beta type-5 OS=Rattus norvegicus GN=Psmb5 PE=1 SV=3	8	0	2.24774	0.0323072	2.3535	0.0858024	2.14584	0.0315488	2.02721	0.0273731	2.25726	0.0769174	2.45376	0.0658315	27.7265	0.450843	0.0552852	5	17	1.31371e-07	0.000161192
18976	AM858935	"(sp:Q0MQI7) NADH dehydrogenase [ubiquinone] flavoprotein 2, mitochondrial OS=Pongo pygmaeus GN=NDUFV2 PE=2 SV=1"	8	0	1.94813	0.0649202	2.25445	0.068545	1.90133	0.0312251	1.85089	0.0370418	2.14979	0.0329274	2.34058	0.0498515	63.7049	0.813257	0.0434044	5	17	2.08669e-10	4.14416e-07
7367	CU988291	(sp:Q5RC35) Transmembrane protein 85 OS=Pongo abelii GN=TMEM85 PE=2 SV=1	8	0	1.87986	0.0915941	1.84704	0.0926247	1.61312	0.0945362	1.48041	0.04591	1.64957	0.0747653	1.96779	0.0201574	24.3201	0.68983	0.0964396	5	17	3.44847e-07	0.000374504
18933	AM864705	(sp:P70195) Proteasome subunit beta type-7 OS=Mus musculus GN=Psmb7 PE=1 SV=1	8	0	2.3345	0.0350411	2.43379	0.0811716	2.19016	0.0492011	2.04755	0.0441385	2.29004	0.112127	2.50314	0.0382328	28.0331	0.544889	0.066087	5	17	1.21062e-07	0.000149632
23160	AM858305	(sp:P0C6T1) Chromosome transmission fidelity protein 8 homolog OS=Rattus norvegicus GN=Chtf8 PE=3 SV=1	8	0	1.06542	0.037298	1.44447	0.134501	1.03475	0.0189358	0.780713	0.0361524	1.04324	0.0490939	1.44319	0.0550969	59.3034	1.34949	0.0773694	5	17	3.69585e-10	7.14778e-07
745	CU998990	(sp:Q9CQZ5) NADH dehydrogenase [ubiquinone] 1 alpha subcomplex subunit 6 OS=Mus musculus GN=Ndufa6 PE=1 SV=1	8	0	1.66244	0.0458155	1.80919	0.0961058	1.55719	0.0547454	1.56402	0.060531	1.74939	0.0670382	2.05043	0.0516701	32.7981	0.684775	0.070987	5	17	3.72468e-08	5.20337e-05
11038	AM861012	(sp:Q96HJ9) UPF0562 protein C7orf55 OS=Homo sapiens GN=C7orf55 PE=1 SV=2	8	0	1.53667	0.0415728	1.55522	0.114495	1.46654	0.0567495	1.3546	0.0594351	1.62082	0.126329	1.85314	0.0879025	15.9033	0.560686	0.11987	5	17	6.87953e-06	0.00432035
22280	CU686479	(sp:Q5R8E4) Regulator of microtubule dynamics protein 1 OS=Pongo abelii GN=FAM82B PE=2 SV=1	8	0	1.30925	0.12545	1.52919	0.108424	1.3857	0.119031	1.23384	0.113567	1.60315	0.187692	1.93668	0.131498	15.2013	1.27874	0.28601	5	17	9.32627e-06	0.00553048
29737	AM863615	0	8	0	1.81372	0.0596011	2.1621	0.0382616	1.72291	0.135524	1.52503	0.0540572	2.29547	0.0865558	2.34061	0.0352321	74.7936	2.14754	0.0976236	5	17	5.74489e-11	1.19666e-07
21143	AM857608	"(sp:Q8WTC1) 28S ribosomal protein S15, mitochondrial OS=Drosophila melanogaster GN=bonsai PE=2 SV=2"	8	0	1.35048	0.0438764	1.46989	0.0641558	1.18386	0.123459	1.11301	0.0522614	1.25807	0.0274456	1.56908	0.0782093	22.1114	0.597658	0.0919001	5	17	6.87324e-07	0.000673578
2317	AM863208	(sp:Q8CI33) CWF19-like protein 1 OS=Mus musculus GN=Cwf19l1 PE=2 SV=1	8	0	0.944709	0.0861497	0.894825	0.133286	0.629701	0.0419821	0.364083	0.0182994	0.399099	0.061755	0.825413	0.0340314	43.6695	1.19391	0.0929546	5	17	4.12367e-09	6.97313e-06
30736	AM863144	0	8	0	1.78453	0.0754345	1.81445	0.129834	1.62208	0.0713846	1.25698	0.0585391	1.75206	0.0420657	2.00781	0.0853479	36.6093	1.27703	0.118602	5	17	1.61144e-08	2.45261e-05
16474	AM854286	0	8	0	1.68641	0.203035	1.43198	0.0638929	1.25973	0.201757	0.793157	0.124008	1.06369	0.114324	1.43833	0.115987	17.812	1.94185	0.370667	5	17	3.16486e-06	0.00237048
21602	AM866389	0	8	0	1.50542	0.0570602	1.59147	0.124157	1.42515	0.129086	1.00437	0.0503746	1.45112	0.0284876	1.70138	0.0433089	32.1141	1.1416	0.120865	5	17	4.36874e-08	5.98954e-05
39497	AM857973	0	8	0	1.05883	0.0375756	1.23585	0.0345278	0.889931	0.0592197	0.789705	0.052244	1.00185	0.0844307	1.26612	0.06724	44.0658	0.704304	0.0543423	5	17	3.84332e-09	6.55286e-06
44561	FP007992	(sp:Q15291) Retinoblastoma-binding protein 5 OS=Homo sapiens GN=RBBP5 PE=1 SV=2	8	0	1.52345	0.0262561	1.56846	0.10292	1.36808	0.0449146	1.19505	0.0883676	1.491	0.104352	1.76837	0.0849919	23.7555	0.746021	0.106774	5	17	4.09188e-07	0.000431284
7058	AM868618	0	8	male gonad	0.331672	0.199069	0.547322	0.150174	0.228889	0.0895058	0.197384	0.0488459	0.494133	0.135918	0.866189	0.113742	14.3878	1.24197	0.293492	5	17	1.34569e-05	0.00738785
44232	AM857602	(sp:Q7ZY85) Transmembrane protein 188 OS=Xenopus laevis GN=tmem188 PE=2 SV=1	8	0	1.1433	0.0416348	1.49879	0.0635796	1.07672	0.0443732	1.06222	0.0297573	1.40634	0.0681117	1.7369	0.0431612	122.847	1.47265	0.040758	5	17	1.00187e-12	2.33435e-09
38699	AM858396	(sp:Q6P2U9) COP9 signalosome complex subunit 3 OS=Danio rerio GN=cops3 PE=2 SV=1	8	0	1.59646	0.0578028	1.82131	0.0595822	1.55607	0.048907	1.50062	0.0399869	1.65894	0.0547126	1.96834	0.0477277	47.2103	0.631324	0.0454669	5	17	2.24224e-09	3.96651e-06
19134	AM857677	(sp:Q9Y547) Heat shock protein beta-11 OS=Homo sapiens GN=HSPB11 PE=1 SV=1	8	0	1.18173	0.0371038	1.61098	0.0956049	1.10879	0.166232	1.06572	0.0727173	1.51313	0.158102	1.90078	0.0821338	37.2098	2.19477	0.200544	5	17	1.42235e-08	2.18331e-05
16871	AM857507	(sp:P52292) Importin subunit alpha-2 OS=Homo sapiens GN=KPNA2 PE=1 SV=1	8	0	2.15866	0.129694	2.30113	0.0749851	1.9252	0.123925	1.47491	0.160467	2.27768	0.104063	2.32314	0.216924	20.4987	2.13113	0.353478	5	17	1.181e-06	0.00105227
40707	BQ426337	(sp:Q9NRX3) NADH dehydrogenase [ubiquinone] 1 alpha subcomplex subunit 4-like 2 OS=Homo sapiens GN=NDUFA4L2 PE=2 SV=1	8	0	2.33995	0.0253405	2.45383	0.0403098	2.34912	0.0449024	2.26468	0.0301861	2.48942	0.0447538	2.50549	0.0370796	25.4993	0.177849	0.0237138	5	17	2.43841e-07	0.000275053
25806	AM858765	0	8	0	1.11183	0.104536	1.37071	0.0381905	1.04463	0.07097	0.930368	0.0843835	1.30239	0.0922369	1.59193	0.072226	37.4184	1.16983	0.106296	5	17	1.36259e-08	2.10248e-05
31771	AM858831	(sp:P40937) Replication factor C subunit 5 OS=Homo sapiens GN=RFC5 PE=1 SV=1	8	0	2.02098	0.0509087	2.0632	0.0581755	1.94716	0.0335763	1.70965	0.048883	1.91453	0.0675282	2.17981	0.0620466	34.8018	0.503075	0.0491484	5	17	2.37315e-08	3.48378e-05
38783	AM857731	(sp:Q96BD8) Spindle and kinetochore-associated protein 1 OS=Homo sapiens GN=SKA1 PE=1 SV=1	8	0	1.54781	0.18558	1.57231	0.0719852	1.40811	0.16721	1.02603	0.0772381	1.47227	0.0769723	1.76509	0.0579142	17.0677	1.21759	0.242552	5	17	4.24853e-06	0.00296548
25138	AM861895	hypothetical protein [Schistosoma mansoni]	8	0	1.82659	0.0478349	2.03728	0.0627042	1.69077	0.0592739	1.71004	0.0344271	1.86176	0.0505535	2.20834	0.0408447	63.3578	0.798906	0.042872	5	17	2.17991e-10	4.32057e-07
44337	AM857074	"(sp:Q9DB77) Cytochrome b-c1 complex subunit 2, mitochondrial OS=Mus musculus GN=Uqcrc2 PE=1 SV=1"	8	0	2.33069	0.0149535	2.45625	0.0416029	2.31442	0.0374294	2.27137	0.038225	2.46324	0.0449135	2.49955	0.0365518	26.3777	0.174497	0.0224921	5	17	1.90032e-07	0.000220817
10940	AM864524	(sp:Q02370) NADH dehydrogenase [ubiquinone] 1 alpha subcomplex subunit 2 OS=Bos taurus GN=NDUFA2 PE=1 SV=2	8	0	1.87547	0.117045	2.0713	0.124535	1.71081	0.0803396	1.65923	0.0520158	1.92863	0.103661	2.29376	0.0711912	24.7571	1.10534	0.151801	5	17	3.02786e-07	0.000332459
2931	AM857779	(sp:Q6GQA6) COP9 signalosome complex subunit 8 OS=Xenopus laevis GN=csn8 PE=2 SV=2	8	0	1.49347	0.0883084	1.50092	0.0662877	1.28866	0.0756517	1.12894	0.0488297	1.31403	0.0692889	1.55	0.0818271	19.6676	0.524017	0.0905888	5	17	1.58301e-06	0.00135664
36318	BQ426921	(sp:P83941) Transcription elongation factor B polypeptide 1 OS=Rattus norvegicus GN=Tceb1 PE=1 SV=1	8	0	2.0765	0.0696759	2.42501	0.0369094	2.15629	0.0775946	2.20281	0.0610218	2.4834	0.03204	2.50602	0.0369367	41.1155	0.653385	0.0540309	5	17	6.5862e-09	1.07355e-05
18325	AM858850	0	8	0	0.502651	0.0384902	0.722164	0.0863128	0.240226	0.077104	0.081931	0.103223	0.288151	0.250111	0.674741	0.0934654	19.2493	1.29034	0.227912	5	17	1.84165e-06	0.00154146
38794	AM854376	"(sp:Q24439) ATP synthase subunit O, mitochondrial OS=Drosophila melanogaster GN=Oscp PE=2 SV=2"	8	0	2.24199	0.0632816	2.37703	0.0488154	2.08103	0.0657191	2.01302	0.0338775	2.19055	0.059039	2.4654	0.0746161	33.8909	0.590463	0.0592364	5	17	2.90429e-08	4.16475e-05
21530	ES789210	0	8	0	2.09386	0.0225041	2.40142	0.0868549	2.01322	0.0243199	2.07749	0.0656573	2.31008	0.0201563	2.46837	0.0485487	52.2513	0.71832	0.0467412	5	17	1.00909e-09	1.84664e-06
26782	BQ427325	0	8	0	1.55807	0.0769305	1.66533	0.12862	1.48994	0.0660097	1.45259	0.0879368	1.61866	0.0643599	1.92677	0.0625347	15.9374	0.579701	0.123671	5	17	6.78058e-06	0.00428533
9474	AM861357	"(sp:Q8BMS1) Trifunctional enzyme subunit alpha, mitochondrial OS=Mus musculus GN=Hadha PE=1 SV=1"	8	0	2.15003	0.0432911	2.22159	0.0541223	1.92924	0.0777528	1.79761	0.0794078	2.11233	0.0688278	2.36688	0.0374453	43.6564	0.83646	0.0651443	5	17	4.13331e-09	6.9853e-06
12164	AM857804	0	8	0	0.756038	0.0781125	0.783183	0.116444	0.443772	0.0841709	0.362998	0.0630244	0.525958	0.0777074	0.767225	0.055187	20.3914	0.679913	0.113367	5	17	1.22581e-06	0.00108485
22917	CU999736	0	8	0	1.97573	0.0263384	2.2195	0.0737482	1.88221	0.0814165	1.85286	0.0444365	2.07417	0.0171101	2.38523	0.0445907	57.0345	0.851455	0.0507578	5	17	5.04103e-10	9.55275e-07
11129	AM857580	"(sp:Q0VFH6) 39S ribosomal protein L22, mitochondrial OS=Xenopus tropicalis GN=mrpl22 PE=2 SV=1"	8	0	1.69958	0.0515921	1.79319	0.145156	1.43714	0.0899657	1.34342	0.0681968	1.46939	0.118418	1.83624	0.0695857	18.6256	0.832688	0.152002	5	17	2.31961e-06	0.00183945
9796	AM865687	(sp:O35280) Serine/threonine-protein kinase Chk1 OS=Mus musculus GN=Chek1 PE=1 SV=2	8	0	0.480434	0.07193	0.634873	0.095126	0.191945	0.0718494	-0.0307411	0.0556308	0.415835	0.0472624	0.682297	0.0433591	64.9226	1.48076	0.0775475	5	17	1.79318e-10	3.59173e-07
31129	AM857495	(sp:Q18359) Probable NADH dehydrogenase [ubiquinone] 1 alpha subcomplex subunit 5 OS=Caenorhabditis elegans GN=C33A12.1 PE=3 SV=1	8	0	1.73098	0.0575025	2.01578	0.10161	1.74011	0.0913509	1.68248	0.0229291	1.88633	0.137096	2.29226	0.0463691	32.7304	1.07381	0.111546	5	17	3.78341e-08	5.27408e-05
28061	FP000529	(sp:Q9Z1P6) NADH dehydrogenase [ubiquinone] 1 alpha subcomplex subunit 7 OS=Mus musculus GN=Ndufa7 PE=1 SV=3	8	0	2.07228	0.0443252	2.35246	0.110089	2.08176	0.0572312	2.14516	0.0557699	2.30696	0.0714613	2.5047	0.0386504	26.4897	0.592939	0.0761048	5	17	1.84184e-07	0.000216048
3343	AM861532	0	8	0	1.91427	0.0866188	2.0434	0.134295	1.87038	0.0916638	1.86931	0.0275131	2.01381	0.0432073	2.30465	0.0279788	16.7939	0.544191	0.110174	5	17	4.74679e-06	0.00323731
37113	FP000860	(sp:Q08AG7) UPF0582 protein C13orf37 OS=Homo sapiens GN=C13orf37 PE=2 SV=2	8	0	1.81489	0.0585529	2.01083	0.095089	1.73382	0.053354	1.54719	0.050716	1.72902	0.0802772	2.11585	0.13728	23.3694	0.846063	0.123093	5	17	4.60896e-07	0.000478871
15168	CU682058	0	8	0	1.1062	0.0544114	1.46701	0.10082	1.0752	0.038316	1.05688	0.0590752	1.51765	0.0549905	1.62842	0.0831766	53.4383	1.27392	0.0810529	5	17	8.44905e-10	1.55969e-06
12139	CU986637	(sp:P62489) DNA-directed RNA polymerase II subunit RPB7 OS=Rattus norvegicus GN=Polr2g PE=2 SV=1	8	0	1.88462	0.0681364	1.9987	0.0560231	1.83502	0.0462242	1.74757	0.0473824	1.88604	0.0348936	2.18141	0.0554094	32.0737	0.454073	0.0481345	5	17	4.41053e-08	6.03801e-05
32107	AM857977	(sp:Q5RGJ5) CWF19-like protein 1 OS=Danio rerio GN=cwf19l1 PE=2 SV=1	8	0	1.48516	0.0676357	1.42224	0.0581243	1.03768	0.164498	0.951975	0.075675	0.977753	0.0977218	1.26529	0.055748	23.4616	1.03949	0.15064	5	17	4.47912e-07	0.000467172
21229	CB617549	"(sp:P91929) NADH dehydrogenase [ubiquinone] 1 alpha subcomplex subunit 10, mitochondrial OS=Drosophila melanogaster GN=ND42 PE=1 SV=2"	8	0	-0.166551	0.0498907	0.027911	0.0764699	-0.459092	0.0203772	-0.542789	0.086247	-0.19414	0.136607	0.135368	0.0826582	44.7649	1.40077	0.106392	5	17	3.39923e-09	5.86368e-06
38812	AM858020	(sp:Q7T3E4) Lariat debranching enzyme OS=Danio rerio GN=dbr1 PE=1 SV=1	8	0	0.176801	0.0679968	0.303559	0.0247817	-0.0152536	0.0430874	-0.211469	0.074013	0.153268	0.0753857	0.480422	0.0450568	71.8349	1.16569	0.0551728	5	17	7.95487e-11	1.63552e-07
40729	AM859057	(sp:Q9VGI8) Bloom syndrome protein homolog OS=Drosophila melanogaster GN=mus309 PE=1 SV=1	8	0	1.12401	0.0389735	1.23892	0.0603455	0.786497	0.0561276	0.632916	0.0277048	1.14252	0.0343963	1.33679	0.0855172	98.3098	1.49029	0.0515409	5	17	6.23335e-12	1.39191e-08
40087	AM859423	(sp:Q1T769) Protein MIS12 homolog OS=Gallus gallus GN=MIS12 PE=2 SV=1	8	0	1.15783	0.04351	1.55807	0.0452533	1.08555	0.0458041	0.91623	0.0633973	1.34664	0.0440848	1.67153	0.0567665	130.233	1.67499	0.0437289	5	17	6.19171e-13	1.45567e-09
21532	BQ426893	0	8	0	1.22264	0.138701	1.36675	0.0615698	0.839437	0.0814508	0.63676	0.0472928	1.57883	0.114874	1.61567	0.0648664	76.2992	3.02309	0.134713	5	17	4.89077e-11	1.02364e-07
27751	AM866447	0	8	0	0.215647	0.0860882	0.456488	0.2718	0.24755	0.1305	-0.152462	0.179396	0.562666	0.0845102	0.848884	0.153409	16.4166	2.30018	0.476385	5	17	5.54409e-06	0.00363693
17292	AM859066	"(sp:P35816) [Pyruvate dehydrogenase [acetyl-transferring]]-phosphatase 1, mitochondrial OS=Bos taurus GN=PDP1 PE=1 SV=1"	8	0	0.616301	0.0598131	0.822389	0.0514972	0.542419	0.0160175	0.601009	0.0330582	0.718785	0.0424005	0.98004	0.117995	26.8185	0.537167	0.0681009	5	17	1.68136e-07	0.00020025
16510	AM861163	0	8	0	1.34767	0.105725	1.4543	0.0830423	1.07105	0.0926944	0.849759	0.0590071	1.20717	0.136508	1.59072	0.0939181	31.8256	1.44315	0.154174	5	17	4.67698e-08	6.35134e-05
41922	AM859796	predicted protein [Nematostella vectensis]	8	0	0.648993	0.0884723	0.810843	0.13033	0.717279	0.107205	0.348502	0.0841267	0.615538	0.104531	0.901974	0.0894929	14.0361	0.726703	0.176031	5	17	1.5847e-05	0.00833552
25469	AM858017	(sp:Q7ZUS1) Serine/threonine-protein kinase VRK1 OS=Danio rerio GN=vrk1 PE=2 SV=1	8	0	0.343848	0.0533673	0.52631	0.1361	0.0414416	0.2108	-0.0296957	0.103007	0.469615	0.145689	0.578175	0.0880113	15.0469	1.3053	0.294944	5	17	9.98612e-06	0.00582191
6319	AM863968	(sp:Q04323) UBX domain-containing protein 1 OS=Homo sapiens GN=UBXN1 PE=1 SV=2	8	0	1.30286	0.0383191	1.62037	0.123852	1.29837	0.0459827	1.26203	0.0239633	1.40881	0.132343	1.77624	0.0482342	29.3161	0.866533	0.100498	5	17	8.67058e-08	0.000110897
39063	FP004920	"(sp:Q9Y6H1) Coiled-coil-helix-coiled-coil-helix domain-containing protein 2, mitochondrial OS=Homo sapiens GN=CHCHD2 PE=1 SV=1"	8	0	2.13596	0.0420896	2.33064	0.0402475	2.07702	0.056575	2.04439	0.0392906	2.16587	0.117937	2.48639	0.0610241	30.6731	0.571944	0.0633979	5	17	6.1756e-08	8.19503e-05
35242	FP000037	0	8	0	1.59261	0.0565226	1.66005	0.0411891	1.41449	0.0867684	1.26292	0.0557736	1.52963	0.0728415	1.85668	0.0299635	47.4517	0.835955	0.0598976	5	17	2.1543e-09	3.82388e-06
28747	AM859307	(sp:Q8BP27) Uncharacterized protein C10orf78 homolog OS=Mus musculus PE=1 SV=2	8	0	1.04365	0.0806833	1.17785	0.12326	0.887616	0.0852602	0.689378	0.150562	1.25036	0.160261	1.56912	0.0785923	27.8215	1.83966	0.224821	5	17	1.28076e-07	0.000157405
25141	AM859414	"(sp:Q9CQ06) 39S ribosomal protein L24, mitochondrial OS=Mus musculus GN=Mrpl24 PE=2 SV=1"	8	0	1.94146	0.0360953	2.00655	0.0626827	1.66347	0.0406947	1.56155	0.057054	1.7289	0.107219	2.14588	0.0434505	57.3894	0.997313	0.0590852	5	17	4.79852e-10	9.12199e-07
22248	AM859496	0	8	0	1.8471	0.0816924	1.85217	0.0513756	1.67769	0.0588448	1.36832	0.15581	1.70094	0.134879	2.00565	0.0790453	19.4421	0.95087	0.166287	5	17	1.71699e-06	0.00144742
28134	AM859548	(sp:Q8R2U4) Methyltransferase-like protein 11A OS=Mus musculus GN=Mettl11a PE=2 SV=3	8	0	1.71708	0.0719919	1.78471	0.100928	1.57124	0.0319759	1.52353	0.0452786	1.67029	0.0274929	1.93425	0.0452937	23.9019	0.442833	0.0629922	5	17	3.91308e-07	0.000415569
9714	AM859558	(sp:Q9D0F6) Replication factor C subunit 5 OS=Mus musculus GN=Rfc5 PE=2 SV=1	8	0	1.27275	0.0451953	1.24013	0.0912044	1.14205	0.0141568	0.969667	0.0304595	1.15243	0.0940265	1.3733	0.0545607	21.1075	0.379189	0.0610798	5	17	9.5881e-07	0.000883064
6999	AM859623	(sp:Q99J62) Replication factor C subunit 4 OS=Mus musculus GN=Rfc4 PE=1 SV=1	8	0	0.981888	0.160267	0.969074	0.096129	0.501971	0.0660314	0.244163	0.095193	0.40676	0.0702243	0.765544	0.0637788	37.1222	1.82456	0.16711	5	17	1.44832e-08	2.21448e-05
28448	AM859656	(sp:Q6AYU1) Mortality factor 4-like protein 1 OS=Rattus norvegicus GN=Morf4l1 PE=2 SV=1	8	0	0.556501	0.041103	0.616948	0.135464	0.44662	0.0874902	0.289957	0.0414902	0.539378	0.0575458	0.870659	0.0435798	25.1059	0.742606	0.100568	5	17	2.73302e-07	0.000305005
16181	AM859761	CENP-C [Schizosaccharomyces japonicus yFS275]	8	0	0.132692	0.133407	0.305152	0.172216	-0.117089	0.0818489	-0.416124	0.136143	0.0388929	0.136118	0.38642	0.0749955	21.5109	1.72087	0.271999	5	17	8.37458e-07	0.000798098
14529	AM859834	(sp:P47809) Dual specificity mitogen-activated protein kinase kinase 4 OS=Mus musculus GN=Map2k4 PE=1 SV=2	8	0	1.2599	0.0669686	1.466	0.101677	1.0834	0.0921473	0.970817	0.0388126	1.09809	0.107629	1.37854	0.0643283	22.1163	0.715816	0.110044	5	17	6.86229e-07	0.00067319
21794	AM860049	0	8	0	0.65118	0.114016	0.782149	0.109629	0.407003	0.10644	0.148585	0.153304	0.602429	0.0647473	0.776103	0.0543962	20.6189	1.19353	0.19681	5	17	1.13292e-06	0.00101509
3213	AM860354	0	8	0	1.97436	0.0506311	2.03706	0.0664195	1.74894	0.0778312	1.62478	0.0711858	1.83688	0.123712	2.1527	0.0207027	29.9324	0.758837	0.0861957	5	17	7.41973e-08	9.60855e-05
21249	AM860454	0	8	0	1.852	0.158144	1.62076	0.0894208	1.57192	0.170946	1.09926	0.0734393	1.411	0.13314	1.79244	0.0134221	21.1783	1.48782	0.238857	5	17	9.36164e-07	0.000869696
25083	AM860657	(sp:Q6NWH5) Transmembrane protein 11 OS=Danio rerio GN=tmem11 PE=2 SV=1	8	0	1.47998	0.0680383	1.92835	0.0798554	1.38246	0.0312343	1.18519	0.0486249	1.96111	0.0902485	2.24765	0.064432	154.665	3.26535	0.0717822	5	17	1.49436e-13	3.58646e-10
278	AM860702	(sp:Q9NWQ9) Uncharacterized protein C14orf119 OS=Homo sapiens GN=C14orf119 PE=2 SV=1	8	0	0.85886	0.0866818	0.913836	0.0545984	0.566281	0.0707666	0.564939	0.052781	0.887224	0.115141	1.28266	0.0339315	56.7381	1.41569	0.0848343	5	17	5.25413e-10	9.94607e-07
33903	AM861527	(sp:O43663) Protein regulator of cytokinesis 1 OS=Homo sapiens GN=PRC1 PE=1 SV=2	8	0	1.02756	0.124646	1.0753	0.084629	0.739697	0.0871059	0.128947	0.0406475	0.992229	0.0185742	1.28057	0.0434761	108.198	3.25153	0.102176	5	17	2.8445e-12	6.47693e-09
42594	AM862165	0	8	0	0.0480467	0.0272376	0.248417	0.040824	-0.176561	0.0642079	-0.224808	0.0651392	-0.108365	0.077906	0.20823	0.0795941	42.3885	0.791258	0.0634671	5	17	5.19847e-09	8.63466e-06
19923	AM862170	(sp:P49454) Centromere protein F OS=Homo sapiens GN=CENPF PE=1 SV=2	8	0	1.25423	0.0332222	1.62464	0.0948057	0.928032	0.095997	0.712411	0.0706818	1.4403	0.120282	1.66732	0.114967	70.477	2.93303	0.141497	5	17	9.27615e-11	1.89419e-07
24013	AM862425	(sp:P50532) Structural maintenance of chromosomes protein 4 OS=Xenopus laevis GN=smc4 PE=1 SV=1	8	0	2.14408	0.0400222	2.21304	0.0861379	2.08035	0.0934195	1.80776	0.0349739	1.9605	0.116329	2.1994	0.091959	14.9912	0.482144	0.10935	5	17	1.0237e-05	0.00593745
38640	AM862560	(sp:Q96BR5) Hcp beta-lactamase-like protein C1orf163 OS=Homo sapiens GN=C1orf163 PE=1 SV=2	8	0	1.00615	0.143615	1.19148	0.0553293	0.959216	0.0958567	0.826725	0.0413421	1.01446	0.208001	1.44725	0.107127	14.2019	0.93862	0.224711	5	17	1.46659e-05	0.00781695
24438	AM862564	0	8	0	1.24436	0.089927	1.50831	0.144426	1.13374	0.0784783	1.13868	0.0381336	1.32088	0.0758176	1.60805	0.0361078	20.824	0.766104	0.125084	5	17	1.05586e-06	0.00095344
15271	AM863230	(sp:Q502M8) Exoribonuclease 2 OS=Danio rerio GN=eri2 PE=2 SV=1	8	0	1.16746	0.0748631	1.1577	0.137127	0.99653	0.0805599	0.473305	0.0378398	0.924119	0.112895	1.23046	0.0320581	41.9804	1.55036	0.125564	5	17	5.60417e-09	9.25248e-06
41858	AM863464	0	8	0	1.396	0.0410307	1.56597	0.097605	1.41598	0.022153	1.27828	0.0208702	1.44821	0.0614728	1.80001	0.0686303	37.974	0.648885	0.0580979	5	17	1.21664e-08	1.89432e-05
20841	AM864086	0	8	0	0.417184	0.163212	0.630482	0.0675149	0.147525	0.0765034	-0.198656	0.1863	0.167735	0.0495326	0.62009	0.0475257	30.5842	2.04153	0.226954	5	17	6.31182e-08	8.35054e-05
1793	AM864177	"(sp:Q68FX0) Isocitrate dehydrogenase [NAD] subunit beta, mitochondrial OS=Rattus norvegicus GN=Idh3B PE=2 SV=1"	8	male gonad	1.47037	0.152964	1.96904	0.0783117	1.2189	0.0825118	1.17685	0.0631785	1.89052	0.0624555	2.23792	0.0344251	95.855	3.73123	0.132348	5	17	7.6632e-12	1.69893e-08
6241	AM864235	0	8	0	1.57737	0.144931	1.80336	0.214526	1.50766	0.196041	0.950899	0.0728141	2.07062	0.146928	2.11489	0.144053	27.5456	3.54617	0.43771	5	17	1.37915e-07	0.000168669
4311	AM864317	0	8	0	1.12416	0.117531	1.26475	0.0950095	0.876295	0.0768622	0.425079	0.0281518	0.969904	0.112791	1.29608	0.119726	44.9783	2.07785	0.157069	5	17	3.27532e-09	5.66303e-06
21502	AM864356	0	8	0	1.21659	0.0528037	1.10604	0.112538	1.13111	0.0740078	0.826379	0.0581954	0.99809	0.18288	1.37794	0.0781795	14.9045	0.693397	0.158177	5	17	1.06416e-05	0.00609766
26001	AM864373	(sp:Q91917) DNA repair protein RAD51 homolog B OS=Xenopus laevis GN=rad51-B PE=2 SV=1	8	0	0.610836	0.094295	0.57426	0.0622952	0.442943	0.0749855	0.129895	0.0654872	0.46895	0.112771	0.72292	0.0627942	26.8779	0.832543	0.105315	5	17	1.65408e-07	0.000197497
32096	AM864374	0	8	0	1.12166	0.0662307	1.34118	0.0638956	0.823975	0.0187509	0.773984	0.0378379	0.972921	0.0837119	1.23541	0.0620672	61.8083	1.02401	0.0563297	5	17	2.65702e-10	5.22901e-07
12557	AM864384	0	8	0	0.925871	0.0842135	1.33223	0.0635894	0.865659	0.117812	0.965403	0.0935813	1.6107	0.200191	1.85652	0.0238754	59.8239	3.22312	0.183181	5	17	3.44725e-10	6.69801e-07
6692	AM864414	(sp:O73672) Proteasome subunit alpha type-2 OS=Carassius auratus GN=psma2 PE=2 SV=3	8	0	1.97384	0.065971	1.98602	0.0783134	1.8004	0.0704758	1.6059	0.0154143	1.81757	0.0817204	2.12392	0.0339527	34.8296	0.654425	0.0638836	5	17	2.35873e-08	3.47205e-05
33688	AM864882	(sp:Q4V8Z3) UPF0709 protein C3orf34 homolog OS=Danio rerio GN=si:ch73-159l23.3 PE=2 SV=1	8	0	1.27732	0.0448825	1.50382	0.0982889	1.21541	0.0342518	1.13791	0.0499589	1.28481	0.0530853	1.60128	0.157846	16.9631	0.630702	0.126415	5	17	4.43164e-06	0.00307113
16163	AM864974	(sp:Q556Y9) Mitotic spindle assembly checkpoint protein MAD2A OS=Dictyostelium discoideum GN=mad2l1-1 PE=3 SV=1	8	0	0.902094	0.0714095	0.85186	0.116164	0.724969	0.0189191	0.356614	0.0697411	0.661177	0.230611	1.04994	0.127692	17.0323	1.13578	0.226724	5	17	4.30942e-06	0.00299936
32181	AM865050	predicted protein [Nematostella vectensis]	8	male gonad	1.17521	0.0945229	1.48759	0.0382172	1.04445	0.105865	1.11576	0.0344716	1.32995	0.0254984	1.63175	0.0517954	45.6106	1.04262	0.0777213	5	17	2.93684e-09	5.11891e-06
12522	AM865493	0	8	0	0.630888	0.0594746	0.932883	0.101825	0.325512	0.147208	-0.207139	0.104037	0.767035	0.126734	1.11733	0.0311377	87.9054	4.50462	0.174229	5	17	1.55165e-11	3.36552e-08
10595	AM865801	"(sp:Q9CY16) 28S ribosomal protein S28, mitochondrial OS=Mus musculus GN=Mrps28 PE=2 SV=1"	8	0	1.41314	0.0650399	1.49656	0.0988055	1.26997	0.0586499	1.15084	0.0529047	1.36953	0.0876919	1.75814	0.0397564	36.4652	0.866755	0.0808158	5	17	1.66086e-08	2.51621e-05
24636	AM865889	(sp:P54276) DNA mismatch repair protein Msh6 OS=Mus musculus GN=Msh6 PE=1 SV=2	8	0	0.779061	0.176581	0.813778	0.112381	0.598084	0.0606276	0.2916	0.0536137	0.397999	0.0823569	0.786612	0.034033	19.0827	0.943594	0.168122	5	17	1.95754e-06	0.0016091
24191	AM866055	(sp:Q3UA06) Thyroid receptor-interacting protein 13 OS=Mus musculus GN=Trip13 PE=2 SV=1	8	male gonad	1.05983	0.0840746	1.09681	0.0549545	0.846336	0.104142	0.622385	0.0341113	1.1316	0.0258918	1.45645	0.042701	73.4518	1.5793	0.0731039	5	17	6.64843e-11	1.37755e-07
6109	AM866066	(sp:Q8N8J6) Zinc finger protein 615 OS=Homo sapiens GN=ZNF615 PE=1 SV=2	8	0	0.482776	0.0704974	0.624812	0.11371	0.246847	0.0121635	0.217407	0.0211044	0.388104	0.182515	0.768256	0.0529508	24.0534	0.92333	0.130515	5	17	3.7371e-07	0.000400244
43904	AM866236	(sp:Q9Y248) DNA replication complex GINS protein PSF2 OS=Homo sapiens GN=GINS2 PE=1 SV=1	8	0	1.33419	0.0490734	1.57902	0.106845	1.1657	0.019334	0.860977	0.0436327	1.27256	0.132861	1.8394	0.0596147	82.1842	2.27871	0.0942712	5	17	2.68018e-11	5.71414e-08
11673	AM866249	0	8	0	1.30908	0.048876	1.25468	0.097039	1.04307	0.0973975	0.933264	0.0357003	0.967392	0.0951851	1.28459	0.0531502	19.7773	0.548495	0.0942939	5	17	1.52204e-06	0.00131352
21826	AM866364	(sp:Q96B26) Exosome complex exonuclease RRP43 OS=Homo sapiens GN=EXOSC8 PE=1 SV=1	8	0	1.46927	0.031567	1.69717	0.0687181	1.32827	0.0803288	1.34891	0.0205451	1.43362	0.0576648	1.73248	0.0828578	31.2398	0.59748	0.0650271	5	17	5.38067e-08	7.237e-05
28105	AM866372	0	8	0	1.53483	0.0685372	1.84559	0.0995214	1.4376	0.070258	1.51868	0.0630158	1.64483	0.108703	1.82762	0.0601343	18.6569	0.576215	0.105008	5	17	2.29257e-06	0.00182718
16310	AM866477	(sp:Q5ZLP8) Insulin-like growth factor 2 mRNA-binding protein 3 OS=Gallus gallus GN=IGF2BP3 PE=2 SV=1	8	0	1.12514	0.0532186	1.39771	0.0350562	0.672963	0.0560821	0.748103	0.0416777	0.973343	0.0950696	1.3326	0.155244	51.5123	1.77579	0.117209	5	17	1.1292e-09	2.05741e-06
30966	AM866898	0	8	0	1.50417	0.0678786	1.43687	0.117059	1.37031	0.0842842	0.974262	0.0426682	1.20787	0.0686825	1.57903	0.0639336	31.6318	0.961994	0.103401	5	17	4.89765e-08	6.63631e-05
4654	AM867327	(sp:Q7ZY08) Ubiquitin-conjugating enzyme E2 T OS=Xenopus laevis GN=ube2t PE=2 SV=1	8	0	0.661496	0.0419132	0.416252	0.0730261	0.509105	0.0535264	0.362698	0.122577	0.425207	0.0688948	0.986237	0.12156	28.2619	1.07032	0.128762	5	17	1.13954e-07	0.000141645
35079	AM867341	0	8	0	0.65128	0.0490548	0.843309	0.0556171	0.493212	0.040203	0.402704	0.0582068	0.633644	0.0491413	0.991388	0.0691132	63.7077	0.94946	0.0506715	5	17	2.08594e-10	4.14477e-07
4484	AM867380	0	8	0	1.26129	0.0926986	1.57449	0.0502269	1.18812	0.0858659	1.05448	0.0846953	1.36266	0.112338	1.73921	0.0111077	42.7332	1.28949	0.102596	5	17	4.88138e-09	8.15678e-06
38740	AM867673	0	8	0	1.00495	0.132178	1.231	0.133732	0.962176	0.0836292	0.863296	0.0468433	1.19224	0.0835971	1.51484	0.0670025	23.3049	1.10407	0.161075	5	17	4.7022e-07	0.000486208
19694	AM867732	(sp:Q15645) Thyroid receptor-interacting protein 13 OS=Homo sapiens GN=TRIP13 PE=1 SV=2	8	0	1.74873	0.0602462	1.8686	0.0642982	1.48448	0.0867545	1.28932	0.0190852	1.79508	0.0367572	2.09699	0.067724	87.8448	1.6387	0.0634251	5	17	1.56037e-11	3.38289e-08
4857	AM868384	0	8	male gonad	0.364177	0.0882687	0.83106	0.0718112	0.15406	0.0649127	0.0719796	0.028286	0.940302	0.114062	1.10125	0.0937248	117.262	3.66476	0.106259	5	17	1.46927e-12	3.3852e-09
35731	AM868500	(sp:P62335) 26S protease regulatory subunit S10B OS=Spermophilus tridecemlineatus GN=PSMC6 PE=2 SV=1	8	0	2.22582	0.0329784	2.32605	0.0628344	2.21485	0.0414696	2.1207	0.0364498	2.28427	0.0815639	2.4914	0.0579957	22.6414	0.3173	0.047648	5	17	5.79481e-07	0.000582958
29268	AM868505	(sp:Q15928) Zinc finger protein 141 OS=Homo sapiens GN=ZNF141 PE=2 SV=1	8	0	0.594846	0.0631569	0.704544	0.0483889	0.396499	0.106926	0.283535	0.0407699	0.562076	0.0837638	0.783554	0.0597672	28.6714	0.700136	0.0830257	5	17	1.02373e-07	0.000128375
8836	AM853923	0	8	0	1.94219	0.113656	2.13126	0.0840568	1.90483	0.101097	1.95755	0.0672704	2.26324	0.0815578	2.31393	0.0331223	16.5719	0.588702	0.120782	5	17	5.19914e-06	0.00345743
2668	AM868690	(sp:Q7TN88) Polycystic kidney disease protein 1-like 2 OS=Mus musculus GN=Pkd1l2 PE=2 SV=1	8	0	0.353569	0.226045	1.18498	0.0966959	0.268569	0.0952634	0.231001	0.131936	0.945744	0.0719593	1.31662	0.0302799	58.9182	4.74625	0.273893	5	17	3.89278e-10	7.49361e-07
21927	AM868747	predicted protein [Nematostella vectensis]	8	0	1.26337	0.126148	1.40051	0.0808089	1.20436	0.0561796	1.01653	0.055796	1.22927	0.0899235	1.5088	0.0950857	15.1175	0.575508	0.129435	5	17	9.67827e-06	0.00567147
28957	AM868764	(sp:Q90XG0) Triosephosphate isomerase B OS=Danio rerio GN=tpi1b PE=2 SV=1	8	0	1.04334	0.0416877	1.33065	0.150373	1.10259	0.0289913	1.16139	0.0380992	1.2689	0.0621268	1.61871	0.0572302	29.9896	0.85974	0.0974709	5	17	7.31428e-08	9.50124e-05
23627	AM869109	0	8	0	1.5244	0.100237	1.50036	0.041124	1.49943	0.117399	1.11474	0.0713886	1.52143	0.0487824	1.80464	0.0152792	33.8053	0.967546	0.0973118	5	17	2.96064e-08	4.23964e-05
40016	AM869119	0	8	0	1.33842	0.0680903	1.36809	0.0828885	1.25758	0.0481392	1.10711	0.101354	1.17429	0.028337	1.49307	0.0350452	16.4942	0.376362	0.0775808	5	17	5.36866e-06	0.00355942
3177	AM869126	0	8	0	0.815171	0.0814601	0.669098	0.105738	0.445509	0.141735	-0.0292345	0.0483592	0.1699	0.154453	0.570096	0.0246538	38.6823	1.93714	0.170266	5	17	1.05527e-08	1.66522e-05
41023	AM869337	(sp:Q29RZ2) Peptidylprolyl isomerase domain and WD repeat-containing protein 1 OS=Bos taurus GN=PPWD1 PE=2 SV=1	8	male gonad	0.967811	0.030072	1.23669	0.0247636	0.856548	0.0805402	0.834138	0.0371465	1.01514	0.0417722	1.33096	0.0456734	73.5761	0.820168	0.0379005	5	17	6.55834e-11	1.3602e-07
26014	AM854023	0	8	0	1.29801	0.0539572	1.43159	0.0743682	0.960251	0.0359598	0.811738	0.0506826	1.23637	0.028384	1.43232	0.0769653	78.7997	1.30469	0.0562938	5	17	3.76813e-11	7.96206e-08
17356	BQ426329	(sp:A6QR20) Ankyrin repeat domain-containing protein 32 OS=Bos taurus GN=ANKRD32 PE=2 SV=2	8	0	1.39117	0.118823	1.43162	0.0406911	1.26593	0.0916874	0.960785	0.0291323	1.09135	0.0313951	1.33796	0.0922158	21.661	0.653476	0.102572	5	17	7.96758e-07	0.000767278
42898	BQ426460	0	8	0	0.618489	0.0473531	0.818335	0.130158	0.372441	0.0700669	0.354729	0.0607445	0.551605	0.0812351	0.786466	0.036204	26.4204	0.780792	0.100479	5	17	1.87779e-07	0.00021895
13410	CB617487	0	8	0	0.159995	0.0128582	0.277462	0.0816861	-0.0281991	0.0289738	-0.0589226	0.047161	0.0584434	0.0317989	0.293798	0.0917015	27.0825	0.453669	0.0569547	5	17	1.56382e-07	0.000187971
29051	CU681498	(sp:O59801) Uncharacterized helicase C550.03c OS=Schizosaccharomyces pombe GN=SPCC550.03c PE=2 SV=1	8	0	1.46001	0.0863066	1.49184	0.0479659	1.25081	0.0944927	1.12213	0.0929771	1.38349	0.0295851	1.61064	0.0516959	22.9863	0.620208	0.0917374	5	17	5.19508e-07	0.000531976
39527	AM854153	(sp:Q16667) Cyclin-dependent kinase inhibitor 3 OS=Homo sapiens GN=CDKN3 PE=1 SV=1	8	0	0.906773	0.0488864	1.08018	0.136666	0.909567	0.058101	0.778835	0.049207	0.950487	0.0271965	1.2645	0.126939	14.8465	0.569465	0.130413	5	17	1.09223e-05	0.00620385
39372	CU685527	0	8	0	0.83646	0.217765	1.04735	0.164253	0.811845	0.0437668	0.596684	0.0714682	0.92062	0.0280758	1.27145	0.0732187	13.6412	1.0509	0.261931	5	17	1.91129e-05	0.0095947
42611	CU986374	0	9	0	0.725498	0.0188354	0.350885	0.0830883	0.361472	0.142882	-0.0781254	0.091973	0.272058	0.0836108	0.451435	0.110202	29.0532	1.35707	0.158813	5	17	9.27457e-08	0.000117509
26526	CU987063	0	9	0	1.45644	0.0584586	0.867206	0.0660761	1.22366	0.165518	0.669897	0.0341309	0.55935	0.128295	0.932228	0.0924843	42.9623	2.11794	0.167612	5	17	4.68254e-09	7.85729e-06
42866	CU988479	0	9	0	1.264	0.0410847	1.17683	0.0523375	1.08224	0.0878727	0.787301	0.0524285	1.0936	0.0836863	1.46346	0.0667999	47.2499	1.00178	0.072086	5	17	2.22754e-09	3.94497e-06
31550	CU989656	0	9	0	2.30753	0.0507854	2.17514	0.118263	2.09849	0.0941028	1.49151	0.0896141	2.3142	0.0760296	2.4201	0.0827281	56.6554	2.207	0.132447	5	17	5.31536e-10	1.0046e-06
39778	CU990303	(sp:Q9WU62) Inner centromere protein OS=Mus musculus GN=Incenp PE=1 SV=2	9	0	1.46177	0.184364	1.19836	0.113713	1.34392	0.148123	0.795287	0.150506	1.35524	0.0666774	1.38321	0.0380267	13.664	1.1565	0.28777	5	17	1.89046e-05	0.0095279
36536	CU990716	(sp:Q32PJ3) Origin recognition complex subunit 3 OS=Bos taurus GN=ORC3L PE=2 SV=1	9	female gonad	1.24685	0.0579003	0.771213	0.0796384	1.0644	0.0681696	0.822817	0.0638604	0.785411	0.109747	0.98626	0.0879444	22.6671	0.683689	0.102551	5	17	5.74759e-07	0.000578783
23364	CU991475	(sp:A4K436) Regulator of telomere elongation helicase 1 OS=Bos taurus GN=RTEL1 PE=2 SV=1	9	0	1.28155	0.127229	0.996552	0.038493	0.97387	0.0813662	0.550726	0.0413654	0.944323	0.0996156	1.11386	0.0530699	37.6628	1.17749	0.106297	5	17	1.2961e-08	2.00766e-05
13245	CU991519	(sp:P16255) Signal recognition particle 14 kDa protein OS=Canis familiaris GN=SRP14 PE=1 SV=2	9	0	1.92476	0.0294816	1.68534	0.105667	1.68968	0.0674719	1.39319	0.0289077	1.51645	0.147715	1.91382	0.0361639	29.397	0.863157	0.0998309	5	17	8.49366e-08	0.000108889
25759	CU991773	0	9	0	2.08146	0.0570574	1.52406	0.067017	1.93621	0.105212	1.30631	0.0516483	1.44177	0.166156	1.70377	0.104794	38.6554	1.73509	0.152613	5	17	1.06095e-08	1.67312e-05
560	CU992090	0	9	0	1.84948	0.211995	1.77216	0.0757534	1.71105	0.0518274	1.49894	0.0280248	1.86431	0.0596174	2.08894	0.0105054	15.0646	0.752766	0.169895	5	17	9.90795e-06	0.00578624
27350	CU992682	(sp:P61959) Small ubiquitin-related modifier 2 OS=Rattus norvegicus GN=Sumo2 PE=1 SV=1	9	0	2.4879	0.0596093	2.20017	0.0845789	2.47348	0.0342229	2.15901	0.0423367	2.16688	0.0961867	2.38835	0.0546754	22.6932	0.457091	0.0684834	5	17	5.70002e-07	0.000576272
25279	CU992748	(sp:Q96P70) Importin-9 OS=Homo sapiens GN=IPO9 PE=1 SV=3	9	female gonad	1.3522	0.0928219	1.01721	0.0613904	1.18568	0.146219	0.73628	0.0748625	0.720865	0.22454	0.910719	0.0822651	16.756	1.17907	0.239247	5	17	4.82076e-06	0.00327329
29491	CU993103	0	9	0	1.79133	0.0451899	1.54326	0.075759	1.6236	0.0797239	1.28929	0.108402	1.4549	0.124457	1.67504	0.0276668	18.6715	0.609243	0.11094	5	17	2.28008e-06	0.0018195
25392	CU993146	0	9	0	1.8459	0.116157	1.53772	0.0886703	1.49445	0.154011	0.807174	0.225517	1.64446	0.169972	1.71908	0.129018	22.8572	2.65892	0.395514	5	17	5.41112e-07	0.00054977
40133	CU993160	0	9	0	1.43757	0.0595267	1.27583	0.0673399	1.27588	0.0510645	1.15374	0.0678822	1.25275	0.0431326	1.56611	0.0715763	22.7585	0.434897	0.0649713	5	17	5.58302e-07	0.00056556
40050	CU993555	0	9	0	0.709104	0.141739	0.100144	0.195464	0.573426	0.116581	0.0201081	0.102001	-0.0873124	0.132551	0.220761	0.055367	22.1529	1.8974	0.291211	5	17	6.7811e-07	0.00066726
9218	CU994048	0	9	0	1.14627	0.0850507	0.945433	0.158929	0.915196	0.0906496	0.52997	0.0732579	0.544074	0.0786632	1.06742	0.0985933	24.0812	1.27323	0.179766	5	17	3.7058e-07	0.000397633
3508	CU994651	0	9	0	1.89385	0.127224	1.79377	0.112007	1.55494	0.283077	1.07165	0.180614	1.96695	0.0664641	2.24514	0.0732758	24.2446	3.20455	0.449399	5	17	3.52763e-07	0.00038169
5227	CU995182	0	9	0	1.75096	0.0986969	1.47798	0.0553855	1.52843	0.0863242	1.25225	0.0112238	1.22246	0.113616	1.4397	0.07211	23.2568	0.701644	0.102576	5	17	4.77325e-07	0.000491168
19856	CU995383	0	9	0	2.25829	0.035564	2.12495	0.102992	2.0613	0.117147	1.45062	0.11041	2.22119	0.108236	2.30755	0.103835	39.8477	1.98223	0.169133	5	17	8.3925e-09	1.34867e-05
21874	CU995756	0	9	0	1.48129	0.148068	0.773639	0.111971	1.13915	0.200509	0.610126	0.216063	0.478177	0.261358	0.606085	0.255696	13.8094	2.83012	0.696804	5	17	1.76379e-05	0.00903062
31188	CU996024	(sp:Q08013) Translocon-associated protein subunit gamma OS=Rattus norvegicus GN=Ssr3 PE=1 SV=2	9	0	1.98362	0.0878675	1.9117	0.0175421	1.92055	0.0453706	1.86504	0.0137078	1.88421	0.0195436	2.12467	0.0392407	16.6887	0.177724	0.0362078	5	17	4.95536e-06	0.00332504
39827	CU996403	0	9	0	1.73774	0.100308	1.34569	0.0311368	1.37403	0.176542	0.786565	0.120125	1.06739	0.100982	1.50114	0.148116	28.8344	2.17187	0.256095	5	17	9.81308e-08	0.000123449
7478	CU996637	0	9	0	1.88369	0.121506	0.976462	0.12749	1.28837	0.0456496	0.636129	0.154477	0.802173	0.114716	0.830898	0.329773	26.4229	4.06807	0.523463	5	17	1.87648e-07	0.000219173
42128	CU998170	0	9	0	1.11165	0.0433167	1.05408	0.109267	0.963865	0.0234738	0.689342	0.0946022	0.923649	0.0944647	1.23777	0.0373911	25.7411	0.696451	0.0919903	5	17	2.27501e-07	0.000260034
31752	CU998340	0	9	0	1.96769	0.121684	1.69073	0.0710423	1.77363	0.0546066	1.36921	0.0338267	1.40172	0.0500529	1.72221	0.0883768	33.4413	0.987327	0.100382	5	17	3.21445e-08	4.55809e-05
30961	AM856014	"(sp:Q9Y700) Elongation factor Tu, mitochondrial OS=Schizosaccharomyces pombe GN=tuf1 PE=2 SV=1"	9	0	0.88656	0.100503	0.708488	0.107292	0.673598	0.0724064	0.446995	0.0432268	0.492604	0.0581019	0.882562	0.0451142	22.6054	0.658407	0.0990286	5	17	5.86173e-07	0.000588518
27357	CU999229	(sp:Q6ZQK0) Condensin-2 complex subunit D3 OS=Mus musculus GN=Ncapd3 PE=1 SV=2	9	0	1.79228	0.100005	1.61928	0.0263373	1.61362	0.0700186	1.26483	0.099301	1.42042	0.0931994	1.6098	0.0802825	19.7905	0.65822	0.113082	5	17	1.5149e-06	0.00130888
4010	CU999477	0	9	0	1.73929	0.0811016	1.74312	0.0879255	1.60991	0.0314841	1.46144	0.0466014	1.61523	0.0615582	1.97259	0.022863	32.6706	0.591539	0.0615609	5	17	3.83618e-08	5.3323e-05
13414	CU999848	0	9	0	1.06387	0.142126	0.865244	0.101144	0.673787	0.0799433	0.582386	0.164183	0.877885	0.07616	1.18313	0.103629	14.8533	1.02728	0.235149	5	17	1.08888e-05	0.00619574
6285	DV736755	0	9	0	1.79622	0.0827048	1.53754	0.0837839	1.46708	0.0420522	1.38051	0.110377	1.48397	0.101333	1.66291	0.0530884	13.5546	0.448201	0.112425	5	17	1.99251e-05	0.00992268
8286	FP000043	(sp:Q2VIQ3) Chromosome-associated kinesin KIF4B OS=Homo sapiens GN=KIF4B PE=1 SV=2	9	0	1.81748	0.0924676	1.55507	0.0815113	1.56449	0.154005	1.0323	0.0580439	1.40917	0.0862808	1.69002	0.0642783	32.4348	1.47032	0.154127	5	17	4.05247e-08	5.59646e-05
17556	FP000128	0	9	0	1.82913	0.138232	1.58376	0.132458	1.59706	0.0726008	1.17117	0.0225927	1.21749	0.0393657	1.53522	0.092692	25.6006	1.17596	0.156178	5	17	2.36843e-07	0.00026858
22165	FP000130	(sp:Q3T0M7) Ran-specific GTPase-activating protein OS=Bos taurus GN=RANBP1 PE=2 SV=1	9	0	1.25633	0.0791839	1.02351	0.081344	0.976685	0.0284588	0.864662	0.0610511	0.924536	0.0713684	1.05689	0.0130407	19.4507	0.360234	0.0629693	5	17	1.71166e-06	0.00144465
42067	FP000294	(sp:Q1JPX3) Phenylalanyl-tRNA synthetase alpha chain OS=Danio rerio GN=farsa PE=2 SV=2	9	0	1.25768	0.0350745	1.0074	0.0602187	1.09867	0.0346463	0.936186	0.0621034	0.969698	0.0603744	1.17836	0.0802886	18.4977	0.306681	0.0563701	5	17	2.43394e-06	0.00191794
31377	FP000479	(sp:Q6PFS2) UPF0566 protein OS=Danio rerio GN=zgc:64201 PE=2 SV=1	9	0	1.25282	0.0572672	0.935582	0.163266	1.01182	0.0406338	0.76067	0.0774612	0.739432	0.0516173	1.02245	0.0730996	17.1459	0.676354	0.13412	5	17	4.11705e-06	0.00291076
34249	FP000925	"(sp:Q5SPH9) Probable 28S ribosomal protein S10, mitochondrial OS=Danio rerio GN=mrps10 PE=2 SV=1"	9	0	1.22174	0.0653771	1.22389	0.114794	0.928286	0.0399039	0.826961	0.0574374	0.928376	0.0893426	1.23885	0.0467607	25.7204	0.677457	0.0895536	5	17	2.28852e-07	0.00026112
8998	FP001123	0	9	0	0.843894	0.0289071	0.829686	0.124691	0.635376	0.0655928	0.52568	0.0478276	0.648642	0.0933946	0.965939	0.0893635	16.3766	0.531385	0.110323	5	17	5.63707e-06	0.00367537
17516	FP001316	(sp:Q6IV78) Tafazzin OS=Saimiri sciureus GN=TAZ PE=3 SV=1	9	0	1.58378	0.0907755	1.45172	0.156712	1.39908	0.0720158	1.03351	0.0291875	1.2993	0.0962513	1.71781	0.0442693	26.7578	1.10902	0.140919	5	17	1.70979e-07	0.000203123
34066	FP001757	0	9	0	1.8825	0.0279624	1.71452	0.0346388	1.67185	0.0751688	1.55271	0.0251385	1.54159	0.081421	1.70983	0.0541221	21.369	0.29438	0.0468384	5	17	8.78063e-07	0.000828891
26727	FP001875	0	9	0	1.12981	0.0777121	0.911881	0.147055	0.820685	0.0423559	0.447531	0.0366996	0.521091	0.148846	0.829861	0.0696144	27.3636	1.2174	0.151265	5	17	1.44864e-07	0.000175864
6153	FP002758	0	9	0	0.511109	0.202428	0.213055	0.0711546	0.292799	0.145715	-0.32053	0.193942	-0.193127	0.223839	0.202349	0.111426	13.9924	1.86063	0.452114	5	17	1.61756e-05	0.00847602
28117	FP003979	0	9	0	1.3166	0.137986	1.06242	0.122908	0.977402	0.0213062	0.730716	0.119125	0.836591	0.0649377	0.993219	0.0588656	16.211	0.787677	0.165203	5	17	6.04078e-06	0.0038963
42111	FP004037	0	9	female gonad	0.639958	0.163925	-0.0227964	0.134202	0.435591	0.114372	-0.112629	0.0447834	-0.189892	0.111679	0.0902172	0.167369	24.0359	2.04224	0.288886	5	17	3.75704e-07	0.000402003
7901	FP004170	0	9	0	1.85421	0.0421218	1.36989	0.0991929	1.65728	0.0377458	1.38452	0.0279611	1.35732	0.0427291	1.46892	0.0252307	56.0697	0.775434	0.0470214	5	17	5.77261e-10	1.08698e-06
39838	FP004387	(sp:P50157) T-complex protein 1 subunit alpha (Fragment) OS=Ambystoma mexicanum PE=2 SV=1	9	0	2.37715	0.0362913	2.32015	0.0547191	2.23298	0.05194	2.11566	0.0396295	2.21845	0.0492419	2.41057	0.0483241	21.7561	0.240557	0.0375937	5	17	7.72116e-07	0.000746636
28812	FP006804	0	9	0	2.12327	0.105924	1.98084	0.0226965	1.94576	0.0982468	1.51556	0.017818	1.93668	0.0787753	2.17354	0.146328	25.8793	1.07903	0.141762	5	17	2.18714e-07	0.000251083
[truncated: 209 more rows]

## Sheet: F 0.05
spot	ID	Description	gameto	tissus	2N mean	2N Stdev	3Na mean	3Na Stdev	3Nb mean	3Nb Stdev	F ratio	SS(Groups)	SS(Error)	df(Groups)	df(Error)	Raw p value	Adj p value
[truncated: 730 more rows]

[truncated: 1 more sheets: M 0.05]
